# Supplementary material for: Mucin foraging enables Akkermansia muciniphila to compete against other microbes in the gut and to modulate host sterol biosynthesis
Source: Research Square preprint supplement (doi:10.21203/rs.3.rs-1475049/v1), 2022-03-31
Supplement: Supplementary file 2 [file 783f4b495b4a5bf62f474c68.xlsx]

## Sheet: INSeq in vitro
VLP, INSeq /Transit output
TRANSIT analysis output of INSeq data for A. muciniphila cultures grown for eight generations in mucin medium with or without supplementation with Phytone.
Mucin, 8 generations										Mucin + Phytone, 8 generations
Orf	Desc	Sites	Mean Ctrl	Mean Exp	log2FC	U-Statistic	p-value	Adj. p-value		Orf	Desc	Sites	Mean Ctrl	Mean Exp	log2FC	U-Statistic	p-value	Adj. p-value
Amuc_0544	Tetratricopeptide TPR_2 repeat protein	3231	3449.3	49	-6.14	2385	1e-06	0		Amuc_0544	Tetratricopeptide TPR_2 repeat protein	3231	3681.1	121.6	-4.92	1515	1e-05	1e-05
Amuc_1246	hypothetical protein	1245	34652.8	2806.2	-3.63	1348	4e-05	0.06097		Amuc_1106	peptidase M24	1281	60	9.6	-2.65	119	0.00084	1
Amuc_0809	acetolactate synthase, small subunit	480	15833.3	269.8	-5.88	235	4e-05	0.06097		Amuc_1781	ATPase associated with various cellular activities AAA_3	981	1632	56	-4.86	93	0.00117	1
Amuc_0785	3-isopropylmalate dehydrogenase	1107	4521.4	158.6	-4.83	382	8e-05	0.06918		Amuc_1101	cell division protein FtsA	1782	15046.9	257.5	-5.87	142	0.00186	1
Amuc_2106	Malate dehydrogenase (oxaloacetate-decarboxylating) (NADP(+))	1308	204.7	15.2	-3.75	230	8e-05	0.06918		Amuc_1713	succinyl-CoA synthetase, beta subunit	1179	1435	35.9	-5.32	90	0.00251	1
Amuc_0666	3-isopropylmalate dehydratase, large subunit	1410	680.2	12.3	-5.79	147	0.00011	0.07031		Amuc_0290	glycoside hydrolase family 2 sugar binding	2958	92.2	13.3	-2.79	50	0.00269	1
Amuc_1106	peptidase M24	1281	56.4	5.1	-3.47	185	0.00012	0.07031		Amuc_1631	carboxyl-terminal protease	2244	5661	68.1	-6.38	68	0.00316	1
Amuc_1781	ATPase associated with various cellular activities AAA_3	981	1529.9	25.7	-5.9	144	0.0002	0.10101		Amuc_0576	peptidase M16 domain protein	4326	2105	643.1	-1.71	815	0.00439	1
Amuc_1684	TonB-dependent receptor	2004	77	14.2	-2.44	269	0.00021	0.10101		Amuc_1946	dihydrodipicolinate synthetase	915	1633.8	110.8	-3.88	87	0.00515	1
Amuc_2013	O-acetylhomoserine/O-acetylserine sulfhydrylase	1284	1403.9	27.3	-5.68	179	0.00033	0.14029		Amuc_1102	hypothetical protein	714	12036.3	212.6	-5.82	110	0.00531	1
Amuc_1101	cell division protein FtsA	1782	14102.4	180.4	-6.29	214	0.00077	0.2997		Amuc_0872	acetylornithine and succinylornithine aminotransferase	1254	158.8	8.8	-4.18	48	0.00581	1
Amuc_0065	2-isopropylmalate synthase	1554	80.2	2.9	-4.79	75	0.00113	0.34896		Amuc_0809	acetolactate synthase, small subunit	480	16894.5	7843.7	-1.11	135	0.00593	1
Amuc_1946	dihydrodipicolinate synthetase	915	1531.1	66	-4.54	135	0.00121	0.34896		Amuc_1684	TonB-dependent receptor	2004	82.4	22.9	-1.84	163	0.00596	1
Amuc_1713	succinyl-CoA synthetase, beta subunit	1179	1348.2	32.1	-5.39	135	0.00121	0.34896		Amuc_0029	NAD-dependent epimerase/dehydratase	924	1146.7	48	-4.58	32	0.00836	1
Amuc_0290	glycoside hydrolase family 2 sugar binding	2958	86.1	4.4	-4.3	75	0.00123	0.34896		Amuc_1125	UDP-glucose 4-epimerase	987	2101.2	32.4	-6.02	32	0.00847	1
Amuc_0576	peptidase M16 domain protein	4326	1973.8	569.1	-1.79	1244	0.00132	0.35204		Amuc_2013	O-acetylhomoserine/O-acetylserine sulfhydrylase	1284	1500	102.7	-3.87	107	0.00924	1
Amuc_1631	carboxyl-terminal protease	2244	5306	60.4	-6.46	102	0.00154	0.38631		Amuc_0543	hypothetical protein	1020	6294.8	221.4	-4.83	61	0.02169	1
Amuc_1283	outer membrane autotransporter barrel domain protein	9045	685.9	392.7	-0.8	6225	0.00173	0.41004		Amuc_2051	Glutamate dehydrogenase (NADP(+))	1353	21.6	8.8	-1.29	30	0.02186	1
Amuc_1102	hypothetical protein	714	11285.4	154.7	-6.19	168	0.00185	0.41504		Amuc_0343	Thiol:disulfide interchange protein-like protein	2328	452.3	13.7	-5.05	18	0.02753	1
Amuc_0872	acetylornithine and succinylornithine aminotransferase	1254	147.5	8.7	-4.09	72	0.00298	0.63417		Amuc_1295	binding-protein-dependent transport systems inner membrane component	777	46.6	17.5	-1.41	18	0.02753	1
Amuc_1294	Sulfite reductase (NADPH)	1638	46.4	4	-3.54	48	0.00423	0.81009		Amuc_0058	ATP:guanido phosphotransferase	1053	536.6	60.3	-3.15	18	0.02819	1
Amuc_2051	Glutamate dehydrogenase (NADP(+))	1353	20.3	5.1	-1.98	48	0.00435	0.81009		Amuc_0543--Amuc_0544	intergenic	44	486.8	14.1	-5.11	18	0.02819	1
Amuc_1125	UDP-glucose 4-epimerase	987	1968.5	29.8	-6.05	48	0.00437	0.81009		Amuc_0692--Amuc_0693	intergenic	524	395.3	67.7	-2.55	18	0.02819	1
Amuc_1107	ATP phosphoribosyltransferase	873	2169	183.2	-3.57	125	0.0068	1		Amuc_0206	succinate CoA transferase	1494	116.3	4	-4.87	18	0.02819	1
Amuc_0668	hypothetical protein	1119	530.7	22.3	-4.57	46	0.00913	1		Amuc_0309	phosphoglycerate mutase, 2,3-bisphosphoglycerate-independent	1542	79.3	4.8	-4.04	18	0.02819	1
Amuc_0543	hypothetical protein	1020	5898.5	92.5	-5.99	92	0.01225	1		Amuc_2137	nitroreductase	645	75	98.9	0.4	0	0.02819	1
Amuc_0029	NAD-dependent epimerase/dehydratase	924	1074	65.2	-4.04	45	0.01292	1		Amuc_0666	3-isopropylmalate dehydratase, large subunit	1410	726.8	125.6	-2.53	78	0.03348	1
Amuc_1295	binding-protein-dependent transport systems inner membrane component	777	43.7	5.9	-2.88	27	0.01549	1		Amuc_1246	hypothetical protein	1245	36976.6	37102.9	0	748	0.0405	1
Amuc_0543--Amuc_0544	intergenic	44	455.6	7.7	-5.9	27	0.01604	1		Amuc_1283	outer membrane autotransporter barrel domain protein	9045	731.6	479.6	-0.61	3870	0.04203	1
Amuc_0892	outer membrane autotransporter barrel domain protein	2445	95.6	8.5	-3.5	27	0.01604	1		Amuc_1443	hypothetical protein	1380	2307.4	65.7	-5.14	42	0.04237	1
Amuc_0058	ATP:guanido phosphotransferase	1053	503.9	41.7	-3.59	27	0.01623	1		Amuc_0775	thioesterase superfamily protein	465	34.1	9.4	-1.86	28	0.05039	1
Amuc_0343	Thiol:disulfide interchange protein-like protein	2328	424.1	8.6	-5.62	27	0.01623	1		Amuc_1448	arginine biosynthesis bifunctional protein ArgJ	1251	597.8	11.6	-5.69	28	0.0508	1
Amuc_0692--Amuc_0693	intergenic	524	372	18.3	-4.34	27	0.01623	1		Amuc_0668	hypothetical protein	1119	565.9	35.6	-3.99	28	0.0508	1
Amuc_0206	succinate CoA transferase	1494	110.1	5.7	-4.28	27	0.01623	1		Amuc_0793	hypothetical protein	816	373.4	164.6	-1.18	28	0.0508	1
Amuc_0309	phosphoglycerate mutase, 2,3-bisphosphoglycerate-independent	1542	73.8	4.6	-4.01	27	0.01623	1		Amuc_1190	Alcohol dehydrogenase zinc-binding domain protein	999	60.4	19.8	-1.6	28	0.0508	1
Amuc_1714	Histidinol dehydrogenase	1296	22.6	4.6	-2.29	27	0.01623	1		Amuc_1434	hypothetical protein	978	22.7	10.7	-1.08	17	0.05182	1
Amuc_1443	hypothetical protein	1380	2162.5	32.8	-6.04	64	0.02221	1		Amuc_1294	Sulfite reductase (NADPH)	1638	49	20.4	-1.26	27	0.07453	1
Amuc_1448	arginine biosynthesis bifunctional protein ArgJ	1251	558.7	8.3	-6.08	43	0.02466	1		Amuc_1230	hypothetical protein	813	21142.9	638.2	-5.05	40	0.07575	1
Amuc_1190	Alcohol dehydrogenase zinc-binding domain protein	999	57	14.5	-1.98	43	0.02476	1		Amuc_1984	Methylmalonyl-CoA mutase	2052	103.7	16.6	-2.64	16	0.09192	1
Amuc_2014	cysteine synthase A	927	1139.7	31.9	-5.16	42	0.03356	1		Amuc_1902	conserved hypothetical protein	690	348.6	30.7	-3.51	16	0.09329	1
Amuc_2137	nitroreductase	645	70.4	89.8	0.35	2	0.04196	1		Amuc_0687	outer membrane autotransporter barrel domain protein	3132	236.5	157.5	-0.59	507	0.0949	1
Amuc_1434	hypothetical protein	978	21.5	8.5	-1.34	25	0.04196	1		Amuc_0547	hypothetical protein	504	117.7	2.2	-5.76	8	0.10021	1
Amuc_1230	hypothetical protein	813	19814.2	299.1	-6.05	60	0.05473	1		Amuc_1523	hypothetical protein	744	31.1	1	-5.01	8	0.10021	1
Amuc_0611	Phosphoribosyl-AMP cyclohydrolase	489	2469.7	425.9	-2.54	40	0.06016	1		Amuc_1983	methylmalonyl-CoA mutase, large subunit	2142	28.9	4.1	-2.82	8	0.10021	1
Amuc_1584	type II secretion system protein	1266	4511.6	72.4	-5.96	24	0.06399	1		Amuc_1309	Aldose 1-epimerase	957	4307.1	1811.1	-1.25	54	0.10121	1
Amuc_0556	regulatory protein, FmdB family	258	247.3	12.9	-4.26	24	0.06399	1		Amuc_1070	glycosyl transferase family 2	1011	7131.3	327.1	-4.45	8	0.10519	1
Amuc_0176	peptidase S1 and S6 chymotrypsin/Hap	1002	23.2	10.2	-1.18	24	0.06399	1		Amuc_1100	hypothetical protein	951	3022.9	58.3	-5.7	8	0.10519	1
Amuc_1902	conserved hypothetical protein	690	326.5	29.9	-3.45	24	0.06446	1		Amuc_0531	GreA/GreB family elongation factor	1845	2063.9	699.2	-1.56	8	0.10519	1
Amuc_1984	Methylmalonyl-CoA mutase	2052	97.4	25.6	-1.93	24	0.06446	1		Amuc_1205	ribosomal protein L9	453	1795.2	533.1	-1.75	8	0.10519	1
Amuc_1712	succinyl-CoA synthetase, alpha subunit	885	295.5	6.1	-5.59	12	0.06513	1		Amuc_1766	glycosyl transferase family 2	1515	822.5	114.5	-2.85	8	0.10519	1
Amuc_0559	Argininosuccinate synthase	1290	195.4	4.2	-5.55	12	0.06513	1		Amuc_0059	ATPase AAA-2 domain protein	2580	792.9	90.8	-3.13	8	0.10519	1
Amuc_0547	hypothetical protein	504	108.8	1.8	-5.9	12	0.06513	1		Amuc_0747	aspartate decarboxylase	336	789.8	226.3	-1.8	8	0.10519	1
Amuc_0745	hypothetical protein	639	86.3	2.8	-4.97	12	0.06513	1		Amuc_1101--Amuc_1102	intergenic	97	588	15.7	-5.23	8	0.10519	1
Amuc_1523	hypothetical protein	744	28.8	1.2	-4.54	12	0.06513	1		Amuc_1712	succinyl-CoA synthetase, alpha subunit	885	315.3	9.8	-5.01	8	0.10519	1
Amuc_1983	methylmalonyl-CoA mutase, large subunit	2142	27.3	10.5	-1.37	12	0.06513	1		Amuc_0508	ATP synthase F1, alpha subunit	1530	287.4	147.3	-0.96	8	0.10519	1
Amuc_1105	hypothetical protein	657	7335.3	228.5	-5	12	0.06675	1		Amuc_0830	potassium-transporting ATPase, A subunit	1698	266.3	94.3	-1.5	8	0.10519	1
Amuc_1070	glycosyl transferase family 2	1011	6690.7	198.7	-5.07	12	0.06675	1		Amuc_0086	DNA mismatch repair protein MutL	1899	254.2	67.8	-1.91	8	0.10519	1
Amuc_1100	hypothetical protein	951	2836	30.5	-6.54	12	0.06675	1		Amuc_1120	conserved hypothetical protein	2388	229.9	10.8	-4.42	8	0.10519	1
Amuc_0531	GreA/GreB family elongation factor	1845	1929.4	641.5	-1.59	12	0.06675	1		Amuc_0559	Argininosuccinate synthase	1290	208.9	5.6	-5.23	8	0.10519	1
Amuc_1205	ribosomal protein L9	453	1683.3	826.5	-1.03	12	0.06675	1		Amuc_0362	hypothetical protein	420	174.3	80.6	-1.11	8	0.10519	1
Amuc_1766	glycosyl transferase family 2	1515	772.9	71.2	-3.44	12	0.06675	1		Amuc_1123--Amuc_1124	intergenic	146	127	29.4	-2.11	8	0.10519	1
Amuc_0059	ATPase AAA-2 domain protein	2580	743.7	53.6	-3.79	12	0.06675	1		Amuc_1812--Amuc_1813	intergenic	312	93.6	23	-2.02	8	0.10519	1
Amuc_0747	aspartate decarboxylase	336	738.6	9.9	-6.23	12	0.06675	1		Amuc_0745	hypothetical protein	639	91.5	2.4	-5.25	8	0.10519	1
Amuc_1101--Amuc_1102	intergenic	97	554	10.8	-5.69	12	0.06675	1		Amuc_0030	conserved hypothetical protein	1092	89.3	10.2	-3.12	8	0.10519	1
Amuc_0353	hypothetical protein	1026	448.8	85.6	-2.39	12	0.06675	1		Amuc_1524	hypothetical protein	798	81.9	2.9	-4.83	8	0.10519	1
Amuc_0083	hypothetical protein	537	405.5	49.3	-3.04	12	0.06675	1		Amuc_2148	Beta-N-acetylhexosaminidase	1647	64.8	3.8	-4.08	8	0.10519	1
Amuc_0508	ATP synthase F1, alpha subunit	1530	269.5	67.4	-2	12	0.06675	1		Amuc_0266	ribosomal protein L32	189	45.8	4.4	-3.4	8	0.10519	1
Amuc_0830	potassium-transporting ATPase, A subunit	1698	249.6	85.9	-1.54	12	0.06675	1		Amuc_1203	acetylglutamate kinase	891	40.9	2.7	-3.94	8	0.10519	1
Amuc_1120	conserved hypothetical protein	2388	213	3.8	-5.82	12	0.06675	1		Amuc_0521	conserved hypothetical protein	546	39.6	22.7	-0.81	8	0.10519	1
Amuc_0199	hypothetical protein	1536	147.2	9.1	-4.02	12	0.06675	1		Amuc_0313	hypothetical protein	1875	24.4	5.6	-2.13	8	0.10519	1
Amuc_1123--Amuc_1124	intergenic	146	118.4	30.6	-1.95	12	0.06675	1		Amuc_0491	sulfatase	1500	15.4	6	-1.36	8	0.10519	1
Amuc_1812--Amuc_1813	intergenic	312	88.6	11.4	-2.96	12	0.06675	1		Amuc_1430	ribosomal protein L31	327	2667	630.5	-2.08	26	0.10664	1
Amuc_0030	conserved hypothetical protein	1092	84.2	9.9	-3.09	12	0.06675	1		Amuc_0378	Redoxin domain protein	690	200.1	116.9	-0.78	161	0.1314	1
Amuc_1685	extracellular solute-binding protein family 5	2004	83.3	24	-1.79	12	0.06675	1		Amuc_1869	glycosyl transferase group 1	1296	2295.5	1148.8	-1	69	0.14573	1
Amuc_1524	hypothetical protein	798	77.8	2.2	-5.12	12	0.06675	1		Amuc_1759	peptidase M20	1395	725.5	17	-5.42	15	0.15385	1
Amuc_0246	transcriptional regulator, MarR family	399	75.5	32.2	-1.23	12	0.06675	1		Amuc_0892	outer membrane autotransporter barrel domain protein	2445	101.9	19.7	-2.37	15	0.15558	1
Amuc_2148	Beta-N-acetylhexosaminidase	1647	60.9	3.9	-3.97	12	0.06675	1		Amuc_1107	ATP phosphoribosyltransferase	873	2311	330.1	-2.81	67	0.19169	1
Amuc_0040--Amuc_R0003	intergenic	84	58.5	27.1	-1.11	12	0.06675	1		Amuc_0096	transcriptional regulator, TraR/DksA family	621	1370.9	430	-1.67	36	0.19845	1
Amuc_1299	sulfate adenylyltransferase, small subunit	909	54.5	13.4	-2.03	12	0.06675	1		Amuc_0615	carbamoyl-phosphate synthase, large subunit	3192	6051	2806.4	-1.11	482	0.20124	1
Amuc_0988	TatD-related deoxyribonuclease	813	45.2	27.9	-0.7	12	0.06675	1		Amuc_0394	hypothetical protein	756	109138	2755.5	-5.31	24	0.20273	1
Amuc_0266	ribosomal protein L32	189	43.1	4.8	-3.17	12	0.06675	1		Amuc_0722	GTP-binding protein TypA	1833	458.4	402.9	-0.19	49	0.24146	1
Amuc_1203	acetylglutamate kinase	891	38.5	2	-4.3	12	0.06675	1		Amuc_1060	Membrane-fusion protein-like protein	1422	344.1	181.7	-0.92	49	0.24171	1
Amuc_0521	conserved hypothetical protein	546	37.2	13.2	-1.5	12	0.06675	1		Amuc_0556	regulatory protein, FmdB family	258	264.3	28.4	-3.22	14	0.2433	1
Amuc_0378--Amuc_0379	intergenic	64	21.5	7.2	-1.58	12	0.06675	1		Amuc_1456	hypothetical protein	516	8867.1	14119.4	0.67	4	0.24528	1
Amuc_0491	sulfatase	1500	14.6	4	-1.88	12	0.06675	1		Amuc_1309--Amuc_1310	intergenic	32	6109.8	4329.4	-0.5	14	0.24528	1
Amuc_1091	Cytochrome-c peroxidase	1377	725.6	463.2	-0.65	137	0.07798	1		Amuc_1584	type II secretion system protein	1266	4820.2	137.7	-5.13	14	0.24528	1
Amuc_0775	thioesterase superfamily protein	465	31.8	12.9	-1.3	39	0.07846	1		Amuc_1310	17 kDa surface antigen	477	234.7	185.7	-0.34	14	0.24528	1
Amuc_0793	hypothetical protein	816	349.9	166.4	-1.07	39	0.07868	1		Amuc_1650	acetolactate synthase, large subunit, biosynthetic type	1851	234.3	111.2	-1.08	14	0.24528	1
Amuc_0961	protein of unknown function DUF362	846	118.6	148.6	0.33	9	0.07868	1		Amuc_0906	methionine-R-sulfoxide reductase	1125	185.2	118.3	-0.65	14	0.24528	1
Amuc_0687	outer membrane autotransporter barrel domain protein	3132	221.7	156.5	-0.5	756	0.08403	1		Amuc_1892	hypothetical protein	831	148.6	82	-0.86	14	0.24528	1
Amuc_1309	Aldose 1-epimerase	957	4037.1	1761.8	-1.2	80	0.08913	1		Amuc_0176	peptidase S1 and S6 chymotrypsin/Hap	1002	24.6	14.9	-0.73	14	0.24528	1
Amuc_1060	Membrane-fusion protein-like protein	1422	322.7	68.6	-2.23	80	0.08913	1		Amuc_1714	Histidinol dehydrogenase	1296	24.2	14.5	-0.74	14	0.24528	1
Amuc_1869	glycosyl transferase group 1	1296	2151.9	874.6	-1.3	105	0.10003	1		Amuc_0431	pyruvate kinase	1419	140.5	102	-0.46	7	0.24716	1
Amuc_1870	Alpha-glucosidase	2394	51.7	22.1	-1.22	38	0.10161	1		Amuc_0040--Amuc_R0003	intergenic	84	61.6	33.3	-0.89	7	0.24716	1
Amuc_1537	outer membrane autotransporter barrel domain protein	9456	611.4	292.7	-1.06	242	0.10389	1		Amuc_0988	TatD-related deoxyribonuclease	813	48	33.5	-0.52	7	0.24716	1
Amuc_1059	acriflavin resistance protein	3156	720	347.6	-1.05	132	0.12236	1		Amuc_1235--Amuc_1236	intergenic	226	46.5	12.6	-1.88	7	0.24716	1
Amuc_1430	ribosomal protein L31	327	2500.2	1104.7	-1.18	37	0.12956	1		Amuc_0485--Amuc_0486	intergenic	152	41.5	23.4	-0.82	7	0.24716	1
Amuc_1438	Glycosyl hydrolase family 98 putative carbohydrate binding module	1917	762.3	130.7	-2.54	37	0.12956	1		Amuc_0378--Amuc_0379	intergenic	64	23.2	9.2	-1.33	7	0.24716	1
Amuc_0867	peptidase M42 family protein	1146	643.8	128.7	-2.32	37	0.12956	1		Amuc_1797	conserved hypothetical protein	870	23	31	0.43	1	0.24716	1
Amuc_1558	peptidase M50	1443	305	13.9	-4.45	11	0.1313	1		Amuc_0768	ferripyochelin binding protein (fbp)	534	71.9	54.6	-0.4	65	0.24753	1
Amuc_0086	DNA mismatch repair protein MutL	1899	237.8	66	-1.85	11	0.13361	1		Amuc_1052	trigger factor	1308	546.7	421.6	-0.38	126	0.26187	1
Amuc_0362	hypothetical protein	420	163.7	97.2	-0.75	11	0.13361	1		Amuc_1722	outer membrane autotransporter barrel domain protein	5526	136.1	95.2	-0.52	103	0.26865	1
Amuc_0371	two component regulator propeller domain protein	2574	45.9	8	-2.51	11	0.13361	1		Amuc_0867	peptidase M42 family protein	1146	687.7	220.6	-1.64	23	0.26961	1
Amuc_1235--Amuc_1236	intergenic	226	43.5	13.1	-1.73	11	0.13361	1		Amuc_0961	protein of unknown function DUF362	846	126	138.4	0.14	9	0.26961	1
Amuc_0313	hypothetical protein	1875	22.9	6.6	-1.8	11	0.13361	1		Amuc_0168	hypothetical protein	1545	54.3	46.9	-0.21	23	0.26961	1
Amuc_0670	Trypsin-like protein serine protease typically periplasmic contain C-terminal PDZ domain-like protein	1578	2053.9	1678.6	-0.29	163	0.1341	1		Amuc_0077	2-amino-3-ketobutyrate coenzyme A ligase	1197	11889.2	3419.5	-1.8	48	0.28145	1
Amuc_1759	peptidase M20	1395	680.1	12.5	-5.77	22	0.1377	1		Amuc_1411	hypothetical protein	672	585.1	1067.3	0.87	16	0.29786	1
Amuc_0378	Redoxin domain protein	690	187.4	107.1	-0.81	236	0.14329	1		Amuc_2167	Oligopeptidase A	2100	159	114	-0.48	63	0.31386	1
Amuc_1592	Superoxide dismutase	642	97.4	63.4	-0.62	101	0.15194	1		Amuc_2165	hypothetical protein	738	13054	23880.7	0.87	48	0.34253	1
Amuc_0253	Peptidase M23	867	386.1	142.1	-1.44	36	0.16283	1		Amuc_1438	Glycosyl hydrolase family 98 putative carbohydrate binding module	1917	814.2	223.7	-1.86	22	0.34939	1
Amuc_0168	hypothetical protein	1545	51	39	-0.39	36	0.16283	1		Amuc_1118	sulfatase	1884	114.9	72.2	-0.67	22	0.34939	1
Amuc_0394	hypothetical protein	756	102271	1184.1	-6.43	36	0.16314	1		Amuc_2014	cysteine synthase A	927	1216.1	179	-2.76	22	0.35024	1
Amuc_0669	2-alkenal reductase	1572	350.5	271.1	-0.37	158	0.18842	1		Amuc_0253	Peptidase M23	867	412.6	331.9	-0.31	22	0.35024	1
Amuc_0821	Peptidoglycan-binding LysM	492	4032.3	6276	0.64	53	0.19026	1		Amuc_0447	glycine cleavage system H protein	378	53335.9	17328.5	-1.62	62	0.35105	1
Amuc_0359	hypothetical protein	1104	7003.3	3036.2	-1.21	53	0.19043	1		Amuc_1661--Amuc_1662	intergenic	336	10170.6	13657.1	0.43	17	0.35833	1
Amuc_1456	hypothetical protein	516	8311.1	15499.8	0.9	6	0.19556	1		Amuc_0359	hypothetical protein	1104	7464.5	3885.7	-0.94	33	0.35833	1
Amuc_1309--Amuc_1310	intergenic	32	5720.8	3431.1	-0.74	21	0.19556	1		Amuc_2015	thiamine-phosphate pyrophosphorylase	612	1496.1	1245.9	-0.26	13	0.36616	1
Amuc_2015	thiamine-phosphate pyrophosphorylase	612	1401.6	957.6	-0.55	21	0.19556	1		Amuc_1127	hypothetical protein	459	368.6	467.4	0.34	5	0.36616	1
Amuc_1650	acetolactate synthase, large subunit, biosynthetic type	1851	219.7	74.5	-1.56	21	0.19556	1		Amuc_1413	capsular exopolysaccharide family	2205	39797.8	85191.6	1.1	63	0.36807	1
Amuc_1892	hypothetical protein	831	139.7	82.4	-0.76	21	0.19556	1		Amuc_1537	outer membrane autotransporter barrel domain protein	9456	652.6	424.5	-0.62	145	0.36948	1
Amuc_1673	regulatory protein GntR HTH	1098	51.1	32.5	-0.65	21	0.19556	1		Amuc_1868	glycoside hydrolase family 57	1185	1912.2	1375.5	-0.48	46	0.3736	1
Amuc_1421	serine/threonine protein kinase	2613	155.5	144.8	-0.1	157	0.20102	1		Amuc_2099	hypothetical protein	912	591.1	1914.7	1.7	26	0.3736	1
Amuc_2034	Methylmalonyl-CoA carboxytransferase	1521	722.9	362.5	-1	125	0.21482	1		Amuc_0836	ATP-dependent chaperone ClpB	2580	160.5	104.5	-0.62	78	0.40841	1
Amuc_2165	hypothetical protein	738	12230.9	25946.1	1.08	67	0.21486	1		Amuc_1036	GTP-binding protein LepA	1797	4544.5	4057.8	-0.16	32	0.42557	1
Amuc_0447	glycine cleavage system H protein	378	49984.3	8304.7	-2.59	97	0.22236	1		Amuc_1032	Beta-N-acetylhexosaminidase	1554	281.5	240.1	-0.23	32	0.42598	1
Amuc_0615	carbamoyl-phosphate synthase, large subunit	3192	5670.4	3760.7	-0.59	707	0.23668	1		Amuc_2034	Methylmalonyl-CoA carboxytransferase	1521	771.1	450.5	-0.78	77	0.4439	1
Amuc_2167	Oligopeptidase A	2100	149.5	114.5	-0.39	96	0.24312	1		Amuc_2156--Amuc_2157	intergenic	951	78.6	106.8	0.44	11	0.4439	1
Amuc_0768	ferripyochelin binding protein (fbp)	534	67.5	52.2	-0.37	96	0.24312	1		Amuc_0335	ABC transporter related	744	4226.5	6132.3	0.54	11	0.4447	1
Amuc_0077	2-amino-3-ketobutyrate coenzyme A ligase	1197	11142.7	3003.8	-1.89	72	0.24324	1		Amuc_0770	nitroreductase	651	452.2	627.5	0.47	11	0.4447	1
Amuc_0536	hypothetical protein	777	936.9	407.2	-1.2	10	0.24335	1		Amuc_0787	Rhomboid family protein	873	215.1	159.9	-0.43	21	0.4447	1
Amuc_1763	alanine racemase domain protein	693	351.6	219.7	-0.68	10	0.24335	1		Amuc_1870	Alpha-glucosidase	2394	54.4	28.5	-0.93	21	0.4447	1
Amuc_1472	ribosomal 5S rRNA E-loop binding protein Ctc/L25/TL5	603	282	51.4	-2.45	10	0.24335	1		Amuc_1412	hypothetical protein	1212	15014.1	25742.4	0.78	653	0.44941	1
Amuc_0015	DEAD/DEAH box helicase domain protein	1269	274.5	35.2	-2.96	10	0.24335	1		Amuc_1056	hypothetical protein	735	1463.5	867	-0.76	96	0.45579	1
Amuc_0769	hypothetical protein	2226	61	9.1	-2.75	10	0.24335	1		Amuc_1025	Disulfide bond chaperones of the HSP33 family-like protein	771	939.4	527.7	-0.83	59	0.47848	1
Amuc_1136	hypothetical protein	1251	41.6	12.9	-1.69	10	0.24335	1		Amuc_0215--Amuc_0216	intergenic	597	22743.6	9658	-1.24	6	0.48745	1
Amuc_0096	transcriptional regulator, TraR/DksA family	621	1283.4	482.1	-1.41	51	0.25649	1		Amuc_1891	hypothetical protein	885	9724	13536	0.48	2	0.48745	1
Amuc_1411	hypothetical protein	672	549.2	1327.1	1.27	24	0.25649	1		Amuc_1229--Amuc_1230	intergenic	44	4151.6	98.3	-5.4	6	0.48745	1
Amuc_0037	amino acid permease-associated region	1482	435.2	68.9	-2.66	20	0.26726	1		Amuc_1057--Amuc_1058	intergenic	89	3973.1	3495.9	-0.18	6	0.48745	1
Amuc_0121	sulfatase	1578	94.5	68.3	-0.47	20	0.26726	1		Amuc_R0059	tRNA-Gln	72	3384.4	903.7	-1.9	6	0.48745	1
Amuc_1974	pyruvate, phosphate dikinase	2742	1172.4	657.4	-0.83	306	0.27181	1		Amuc_0670	Trypsin-like protein serine protease typically periplasmic contain C-terminal PDZ domain-like protein	1578	2192.9	2086.1	-0.07	95	0.48745	1
Amuc_1056	hypothetical protein	735	1370.7	576	-1.25	152	0.27308	1		Amuc_1765	ErfK/YbiS/YcfS/YnhG family protein	855	1721.3	1124	-0.61	6	0.48745	1
Amuc_1025	Disulfide bond chaperones of the HSP33 family-like protein	771	880.2	366.3	-1.26	94	0.28857	1		Amuc_0354	hypothetical protein	1287	1406.7	421	-1.74	6	0.48745	1
Amuc_1413	capsular exopolysaccharide family	2205	37300.7	105951	1.51	92	0.28939	1		Amuc_0863	glycosyl hydrolase family 88	2232	1352	920.4	-0.55	6	0.48745	1
Amuc_0052	Hyalurononglucosaminidase	2859	1082	269.6	-2	50	0.29489	1		Amuc_0127	transposase IS3/IS911 family protein	378	1032.4	222.7	-2.21	6	0.48745	1
Amuc_2099	hypothetical protein	912	554.6	1799.5	1.7	38	0.30145	1		Amuc_1841	Thioredoxin domain	942	957.9	915	-0.07	6	0.48745	1
Amuc_1182	sulfatase	1395	12604.8	2157.8	-2.55	33	0.30265	1		Amuc_1911	iron-containing alcohol dehydrogenase	1158	865.5	762.2	-0.18	6	0.48745	1
Amuc_0938	Polyphosphate kinase	2085	368.9	179.1	-1.04	33	0.30265	1		Amuc_0969	galactokinase	1176	833.4	222.7	-1.9	6	0.48745	1
Amuc_1500	polysaccharide deacetylase	960	620.3	682.6	0.14	149	0.32382	1		Amuc_0328	hypothetical protein	2013	779.1	993.4	0.35	2	0.48745	1
Amuc_1412	hypothetical protein	1212	14070.2	30999.9	1.14	958	0.33815	1		Amuc_0754	glycosyl transferase family 2	1023	524.8	109.7	-2.26	6	0.48745	1
Amuc_1486	hypothetical protein	459	76.1	2	-5.25	3	0.34578	1		Amuc_0353	hypothetical protein	1026	478.3	292.5	-0.71	6	0.48745	1
Amuc_1099	hypothetical protein	1011	22.2	0.3	-6.06	3	0.34578	1		Amuc_0083	hypothetical protein	537	432.5	116.2	-1.9	6	0.48745	1
Amuc_1835	Exo-alpha-sialidase	2022	20.3	0.3	-5.93	3	0.34578	1		Amuc_0669	2-alkenal reductase	1572	373.9	324.2	-0.21	95	0.48745	1
Amuc_1976	Sel1 domain protein repeat-containing protein	1086	18.5	0.7	-4.8	3	0.34578	1		Amuc_1763	alanine racemase domain protein	693	373.7	264.7	-0.5	6	0.48745	1
Amuc_0321--Amuc_0322	intergenic	466	18.4	0.3	-5.79	3	0.34578	1		Amuc_1558	peptidase M50	1443	326.6	19	-4.1	6	0.48745	1
Amuc_0166	twitching motility protein	1092	17.9	0.7	-4.75	3	0.34578	1		Amuc_0983--Amuc_0984	intergenic	554	302.5	249.2	-0.28	6	0.48745	1
Amuc_0337	Prephenate dehydrogenase	885	16.2	0.3	-5.6	3	0.34578	1		Amuc_1472	ribosomal 5S rRNA E-loop binding protein Ctc/L25/TL5	603	301.8	86.5	-1.8	6	0.48745	1
Amuc_0437	ribosomal protein S4	609	14.3	0.3	-5.42	3	0.34578	1		Amuc_0015	DEAD/DEAH box helicase domain protein	1269	294	61.7	-2.25	6	0.48745	1
Amuc_1969	hypothetical protein	1413	14.1	0.3	-5.4	3	0.34578	1		Amuc_1833	L-fucose transporter	1932	261.6	512.4	0.97	2	0.48745	1
Amuc_0174	hypothetical protein	855	13.8	0.7	-4.37	3	0.34578	1		Amuc_1832	L-fucose isomerase	1776	232.6	186.9	-0.32	6	0.48745	1
Amuc_0252	hypothetical protein	843	13.2	0.3	-5.3	3	0.34578	1		Amuc_1676	Eco57I restriction endonuclease	1995	227.3	431.1	0.92	2	0.48745	1
Amuc_1054	hypothetical protein	747	11.2	0.3	-5.08	3	0.34578	1		Amuc_0284	hypothetical protein	441	227.2	276.8	0.28	2	0.48745	1
Amuc_0812	glucose inhibited division protein A	1884	11	0.3	-5.04	3	0.34578	1		Amuc_0334	protein of unknown function DUF214	2823	223	189	-0.24	6	0.48745	1
Amuc_1772	Abortive infection protein	777	10.9	0.3	-5.03	3	0.34578	1		Amuc_0922	metallophosphoesterase	1455	200.1	613	1.61	2	0.48745	1
Amuc_0215	hypothetical protein	600	11085.6	8981.5	-0.3	19	0.35523	1		Amuc_1244	N-acetylmuramoyl-L-alanine amidase family 2	729	172.7	62.8	-1.46	6	0.48745	1
Amuc_2068	pseduogene	447	287.8	230.2	-0.32	19	0.35523	1		Amuc_0199	hypothetical protein	1536	158.5	99.4	-0.67	6	0.48745	1
Amuc_1310	17 kDa surface antigen	477	219.4	139.1	-0.66	19	0.35523	1		Amuc_2159	hypothetical protein	798	157.7	54.4	-1.54	6	0.48745	1
Amuc_1624	protein of unknown function DUF107	1434	73.7	40.6	-0.86	19	0.35523	1		Amuc_1693	2-oxoglutarate dehydrogenase, E1 subunit	2763	146.5	104.7	-0.48	6	0.48745	1
Amuc_1868	glycoside hydrolase family 57	1185	1792.2	1205.8	-0.57	68	0.36812	1		Amuc_0377	transcriptional regulator, TetR family	672	127.4	78.4	-0.7	6	0.48745	1
Amuc_0764--Amuc_0765	intergenic	146	106283	79580.3	-0.42	3	0.37109	1		Amuc_0473	hypothetical protein	969	110.6	148.5	0.42	2	0.48745	1
Amuc_1189	ribosomal protein L28	261	51443.5	14077.3	-1.87	3	0.37109	1		Amuc_1820--Amuc_1821	intergenic	328	108.4	118.4	0.13	2	0.48745	1
Amuc_1112	hypothetical protein	126	41736.7	604.5	-6.11	3	0.37109	1		Amuc_0750--Amuc_0751	intergenic	84	99.9	84.2	-0.25	6	0.48745	1
Amuc_1229	hypothetical protein	774	40829.7	608.6	-6.07	3	0.37109	1		Amuc_1685	extracellular solute-binding protein family 5	2004	88.3	45	-0.97	6	0.48745	1
Amuc_1282--Amuc_1283	intergenic	304	39732.6	54767.2	0.46	0	0.37109	1		Amuc_0133	parB-like partition protein	882	81.5	61.1	-0.42	6	0.48745	1
Amuc_0088	hypothetical protein	1950	32222.1	18846.7	-0.77	3	0.37109	1		Amuc_0197--Amuc_0198	intergenic	112	79.4	58.2	-0.45	6	0.48745	1
Amuc_1197	helicase c2	1983	31831.7	99990.4	1.65	0	0.37109	1		Amuc_2020	LAO/AO transport system ATPase	1017	78.3	53.8	-0.54	6	0.48745	1
Amuc_0459	RNA polymerase, sigma-24 subunit, ECF subfamily	597	28261.7	33263.2	0.24	0	0.37109	1		Amuc_1128	conserved hypothetical protein	261	75.8	67.7	-0.16	6	0.48745	1
Amuc_2043--Amuc_2044	intergenic	667	26205.2	97408.9	1.89	0	0.37109	1		Amuc_0769	hypothetical protein	2226	65	94.1	0.53	2	0.48745	1
Amuc_2021	NUDIX hydrolase	474	24838.5	352.4	-6.14	3	0.37109	1		Amuc_1299	sulfate adenylyltransferase, small subunit	909	57.9	32.4	-0.84	6	0.48745	1
Amuc_0686	ABC transporter related	2529	24726.9	295.4	-6.39	3	0.37109	1		Amuc_0975--Amuc_0976	intergenic	65	57.4	31.6	-0.86	6	0.48745	1
Amuc_0667	3-isopropylmalate dehydratase, small subunit	606	23969.6	358.7	-6.06	3	0.37109	1		Amuc_1726	NAD-dependent epimerase/dehydratase	930	56.3	22.7	-1.31	6	0.48745	1
Amuc_0905--Amuc_0906	intergenic	369	18965.2	27829.6	0.55	0	0.37109	1		Amuc_0888--Amuc_0889	intergenic	293	53	32.2	-0.72	6	0.48745	1
Amuc_0556--Amuc_0557	intergenic	69	18319.2	331.9	-5.79	3	0.37109	1		Amuc_0371	two component regulator propeller domain protein	2574	49.7	13.2	-1.91	6	0.48745	1
Amuc_0148--Amuc_0149	intergenic	203	16248.9	24334.7	0.58	0	0.37109	1		Amuc_0097	ROK family protein	957	47.5	29.8	-0.67	6	0.48745	1
Amuc_1792--Amuc_R0055	intergenic	184	13738.2	25380.9	0.89	0	0.37109	1		Amuc_1136	hypothetical protein	1251	44.7	19.4	-1.21	6	0.48745	1
Amuc_0794--Amuc_0795	intergenic	54	10170	8697.8	-0.23	3	0.37109	1		Amuc_1149--Amuc_1150	intergenic	1063	38.2	59	0.63	2	0.48745	1
Amuc_1683	cobyric acid synthase CobQ	2574	6311.3	82.4	-6.26	3	0.37109	1		Amuc_1219	hypothetical protein	561	36.3	33.6	-0.11	6	0.48745	1
Amuc_0601	hypothetical protein	633	6289.7	11589	0.88	0	0.37109	1		Amuc_1129	hypothetical protein	819	34.5	24.4	-0.5	6	0.48745	1
Amuc_0690--Amuc_0691	intergenic	223	6041.8	10573.2	0.81	0	0.37109	1		Amuc_0016--Amuc_0017	intergenic	492	12.3	9.5	-0.37	6	0.48745	1
Amuc_1453--Amuc_1454	intergenic	67	4164.6	5680.3	0.45	0	0.37109	1		Amuc_1282	peptidylprolyl isomerase FKBP-type	831	2704.3	2936.1	0.12	19	0.50056	1
Amuc_2038	PUR-alpha/beta/gamma DNA/RNA-binding	210	4105.1	6232.5	0.6	0	0.37109	1		Amuc_0215	hypothetical protein	600	11829	10503.8	-0.17	12	0.51861	1
Amuc_0096--Amuc_0097	intergenic	433	4014.7	1714.4	-1.23	3	0.37109	1		Amuc_0283	hypothetical protein	261	4370.1	6111.9	0.48	6	0.51861	1
Amuc_1343	hypothetical protein	564	3794.8	2334.5	-0.7	3	0.37109	1		Amuc_0267	hypothetical protein	489	3373.1	379.8	-3.15	12	0.51861	1
Amuc_0440	domain of unknown function DUF1730	1059	3774.9	1328.3	-1.51	3	0.37109	1		Amuc_0037	amino acid permease-associated region	1482	466.1	87.6	-2.41	12	0.51861	1
Amuc_1865	MotA/TolQ/ExbB proton channel	630	3726.2	633.3	-2.56	3	0.37109	1		Amuc_0241	Sel1 domain protein repeat-containing protein	1440	277.7	371.2	0.42	6	0.51861	1
Amuc_0419	General substrate transporter	1959	3692.6	6545.2	0.83	0	0.37109	1		Amuc_0914	Cupin 2 conserved barrel domain protein	336	232.8	286	0.3	12	0.51861	1
Amuc_1154--Amuc_1155	intergenic	349	3181.7	2296.4	-0.47	3	0.37109	1		Amuc_1360--Amuc_1361	intergenic	63	187.4	162.8	-0.2	12	0.51861	1
Amuc_1358	hypothetical protein	462	3034.1	35.7	-6.41	3	0.37109	1		Amuc_1939	efflux transporter, RND family, MFP subunit	1110	93	78	-0.26	12	0.51861	1
Amuc_0831	K+-transporting ATPase, B subunit	2118	3028.4	513.1	-2.56	3	0.37109	1		Amuc_1673	regulatory protein GntR HTH	1098	55.3	42.3	-0.39	12	0.51861	1
Amuc_1882	protein of unknown function DUF1232	285	2968	3443.6	0.21	0	0.37109	1		Amuc_1059	acriflavin resistance protein	3156	770.4	594.7	-0.37	75	0.52023	1
Amuc_1715	Na+-dependent transporter-like protein	894	2761.7	58.9	-5.55	3	0.37109	1		Amuc_0460	hypothetical protein	519	184967	264231	0.51	0	0.54029	1
Amuc_0494	conserved hypothetical protein	573	2645.8	64.8	-5.35	3	0.37109	1		Amuc_0764--Amuc_0765	intergenic	146	113428	91929.2	-0.3	2	0.54029	1
Amuc_0864	sulfatase	1716	2367.9	1188.3	-0.99	3	0.37109	1		Amuc_1189	ribosomal protein L28	261	54879.7	9625.3	-2.51	2	0.54029	1
Amuc_1746	LicD family protein	957	2275.3	1778.4	-0.36	3	0.37109	1		Amuc_1112	hypothetical protein	126	44509.7	1722.2	-4.69	2	0.54029	1
Amuc_0970	SSS sodium solute transporter superfamily	2295	2231.7	490.5	-2.19	3	0.37109	1		Amuc_1229	hypothetical protein	774	43541	1201.7	-5.18	2	0.54029	1
Amuc_0511	H+transporting two-sector ATPase C subunit	261	2222.7	1361.2	-0.71	3	0.37109	1		Amuc_1282--Amuc_1283	intergenic	304	42373.6	50385.7	0.25	0	0.54029	1
Amuc_1601	hypothetical protein	471	2142.5	631.4	-1.76	3	0.37109	1		Amuc_0088	hypothetical protein	1950	34367.8	20706.1	-0.73	2	0.54029	1
Amuc_0784--Amuc_R0025	intergenic	686	2125	1472.8	-0.53	3	0.37109	1		Amuc_1197	helicase c2	1983	33963.3	101871	1.58	0	0.54029	1
Amuc_0598--Amuc_0599	intergenic	140	2098	53.2	-5.3	3	0.37109	1		Amuc_0459	RNA polymerase, sigma-24 subunit, ECF subfamily	597	30130.5	29383.4	-0.04	1	0.54029	1
Amuc_1712--Amuc_1713	intergenic	18	2068.5	50.6	-5.35	3	0.37109	1		Amuc_2043--Amuc_2044	intergenic	667	27950.4	90870	1.7	0	0.54029	1
Amuc_1808--Amuc_1809	intergenic	167	2055.1	1187.7	-0.79	3	0.37109	1		Amuc_2021	NUDIX hydrolase	474	26519.2	777.5	-5.09	2	0.54029	1
Amuc_1542	pyruvate formate-lyase activating enzyme	777	1926.1	4292.7	1.16	0	0.37109	1		Amuc_0686	ABC transporter related	2529	26384	925.2	-4.83	2	0.54029	1
Amuc_2138	histidinol-phosphate aminotransferase	1089	1805.8	25.5	-6.14	3	0.37109	1		Amuc_0667	3-isopropylmalate dehydratase, small subunit	606	25560.2	1781.3	-3.84	2	0.54029	1
Amuc_0762	conserved hypothetical protein	1029	1718.1	18.6	-6.53	3	0.37109	1		Amuc_0905--Amuc_0906	intergenic	369	20251.9	27017.6	0.42	0	0.54029	1
Amuc_1629	hypothetical protein	513	1685.1	27.6	-5.93	3	0.37109	1		Amuc_0556--Amuc_0557	intergenic	69	19554.8	492	-5.31	2	0.54029	1
Amuc_0356--Amuc_0357	intergenic	160	1659.7	2439.9	0.56	0	0.37109	1		Amuc_0148--Amuc_0149	intergenic	203	17343.7	22733.7	0.39	0	0.54029	1
Amuc_1264--Amuc_1265	intergenic	35	1656.9	219	-2.92	3	0.37109	1		Amuc_1792--Amuc_R0055	intergenic	184	14655.9	21356	0.54	0	0.54029	1
Amuc_0322	pseduogene	1231	1613	2699.3	0.74	0	0.37109	1		Amuc_0794--Amuc_0795	intergenic	54	10854.7	11854.7	0.13	0	0.54029	1
Amuc_1040	DNA-directed RNA polymerase, beta' subunit	4194	1569.8	2222.5	0.5	0	0.37109	1		Amuc_1683	cobyric acid synthase CobQ	2574	6735.2	133.1	-5.66	2	0.54029	1
Amuc_0397	Beta-N-acetylhexosaminidase	2166	1525.1	898.8	-0.76	3	0.37109	1		Amuc_0601	hypothetical protein	633	6701.7	11502.8	0.78	0	0.54029	1
Amuc_1196	hypothetical protein	564	1521.4	47.2	-5.01	3	0.37109	1		Amuc_0690--Amuc_0691	intergenic	223	6449	9341.4	0.53	0	0.54029	1
Amuc_0789--Amuc_0790	intergenic	383	1492.3	2236.8	0.58	0	0.37109	1		Amuc_1453--Amuc_1454	intergenic	67	4438.4	5643.1	0.35	0	0.54029	1
Amuc_0663	recA protein	1038	1486.7	589.3	-1.34	3	0.37109	1		Amuc_2038	PUR-alpha/beta/gamma DNA/RNA-binding	210	4376.8	5549.9	0.34	0	0.54029	1
Amuc_2087	hypothetical protein	828	1434.8	1017.1	-0.5	3	0.37109	1		Amuc_0096--Amuc_0097	intergenic	433	4288	1666.1	-1.36	2	0.54029	1
Amuc_R0061	tRNA-Val	72	1382.3	270.4	-2.35	3	0.37109	1		Amuc_1343	hypothetical protein	564	4039.9	3505.7	-0.2	2	0.54029	1
Amuc_1230--Amuc_R0041	intergenic	358	1341.7	896.9	-0.58	3	0.37109	1		Amuc_0440	domain of unknown function DUF1730	1059	4029.3	799.3	-2.33	2	0.54029	1
Amuc_R0062	tRNA-Val	72	1325.8	93	-3.83	3	0.37109	1		Amuc_1865	MotA/TolQ/ExbB proton channel	630	3984.8	929.8	-2.1	2	0.54029	1
Amuc_1009	4Fe-4S ferredoxin iron-sulfur binding domain protein	1308	1314	3419	1.38	0	0.37109	1		Amuc_0419	General substrate transporter	1959	3938.4	6882.4	0.81	0	0.54029	1
Amuc_1643	diacylglycerol kinase catalytic region	855	1276.9	1111.9	-0.2	3	0.37109	1		Amuc_1154--Amuc_1155	intergenic	349	3402.7	2949.1	-0.21	2	0.54029	1
Amuc_0089	protein of unknown function DUF488	354	1195.6	159.8	-2.9	3	0.37109	1		Amuc_1358	hypothetical protein	462	3236.2	92.3	-5.13	2	0.54029	1
Amuc_1506	ribosomal protein L17	408	1130.4	1690.7	0.58	0	0.37109	1		Amuc_0831	K+-transporting ATPase, B subunit	2118	3234.6	910.3	-1.83	2	0.54029	1
Amuc_1373	hypothetical protein	234	1107.6	34.9	-4.99	3	0.37109	1		Amuc_1882	protein of unknown function DUF1232	285	3168.6	3576.4	0.17	0	0.54029	1
Amuc_2006	integrase family protein	1068	1078.9	309.4	-1.8	3	0.37109	1		Amuc_1159	serine/threonine protein kinase	2301	3037.2	2767.4	-0.13	2	0.54029	1
Amuc_1948	conserved hypothetical protein	612	1016.2	1188.2	0.23	0	0.37109	1		Amuc_1715	Na+-dependent transporter-like protein	894	2947.3	88.4	-5.06	2	0.54029	1
Amuc_1958--Amuc_R0057	intergenic	279	992	1712.9	0.79	0	0.37109	1		Amuc_0494	conserved hypothetical protein	573	2825.8	106.9	-4.72	2	0.54029	1
Amuc_0555--Amuc_0556	intergenic	136	915.5	4931.4	2.43	0	0.37109	1		Amuc_0864	sulfatase	1716	2535.1	1632.3	-0.64	2	0.54029	1
Amuc_0899	hypothetical protein	1170	907	4052.4	2.16	0	0.37109	1		Amuc_1746	LicD family protein	957	2428.8	2858.1	0.23	0	0.54029	1
Amuc_2077	polysaccharide export protein	780	887.6	2476.6	1.48	0	0.37109	1		Amuc_0970	SSS sodium solute transporter superfamily	2295	2384.3	658.1	-1.86	2	0.54029	1
Amuc_0073	UBA/THIF-type NAD/FAD binding protein	792	874.1	25.1	-5.12	3	0.37109	1		Amuc_0511	H+transporting two-sector ATPase C subunit	261	2376.2	1677.6	-0.5	2	0.54029	1
Amuc_1705--Amuc_R0051	intergenic	66	858.2	1113.5	0.38	0	0.37109	1		Amuc_1601	hypothetical protein	471	2282.2	1368.1	-0.74	2	0.54029	1
Amuc_1013	conserved hypothetical protein	594	846.9	1959.3	1.21	0	0.37109	1		Amuc_0784--Amuc_R0025	intergenic	686	2265.9	1736.7	-0.38	2	0.54029	1
Amuc_1935--Amuc_1936	intergenic	326	799.5	740.5	-0.11	3	0.37109	1		Amuc_0598--Amuc_0599	intergenic	140	2240.4	70.5	-4.99	2	0.54029	1
Amuc_1548	Ankyrin	1359	759.7	82.7	-3.2	3	0.37109	1		Amuc_1712--Amuc_1713	intergenic	18	2207.1	91.3	-4.59	2	0.54029	1
Amuc_R0002--Amuc_0035	intergenic	777	751.6	1370.6	0.87	0	0.37109	1		Amuc_1808--Amuc_1809	intergenic	167	2198.3	1995.1	-0.14	1	0.54029	1
Amuc_0048	MATE efflux family protein	1503	736.6	17.8	-5.37	3	0.37109	1		Amuc_1542	pyruvate formate-lyase activating enzyme	777	2061.2	3388.1	0.72	0	0.54029	1
Amuc_R0051--Amuc_1706	intergenic	318	710.6	1476.2	1.05	0	0.37109	1		Amuc_2138	histidinol-phosphate aminotransferase	1089	1930.1	43	-5.49	2	0.54029	1
Amuc_0310	thioesterase superfamily protein	408	690.1	114.1	-2.6	3	0.37109	1		Amuc_1404	Sel1 domain protein repeat-containing protein	1119	1835.4	1690.4	-0.12	2	0.54029	1
Amuc_0235--Amuc_0236	intergenic	98	690	734.6	0.09	0	0.37109	1		Amuc_0762	conserved hypothetical protein	1029	1826.5	42.8	-5.42	2	0.54029	1
Amuc_1551--Amuc_1552	intergenic	217	676.8	1056.3	0.64	0	0.37109	1		Amuc_1629	hypothetical protein	513	1800.8	31	-5.86	2	0.54029	1
Amuc_1147	hypothetical protein	876	672.2	12.8	-5.72	3	0.37109	1		Amuc_0356--Amuc_0357	intergenic	160	1774.1	2654.2	0.58	0	0.54029	1
Amuc_1272	hypothetical protein	834	659.4	97.5	-2.76	3	0.37109	1		Amuc_1264--Amuc_1265	intergenic	35	1767.7	2029.8	0.2	0	0.54029	1
Amuc_2074	Acetyltransferase including N-acetylase of ribosomal protein-like protein	594	650.8	544	-0.26	3	0.37109	1		Amuc_1115	integrase family protein	1095	1759	1858.3	0.08	1	0.54029	1
Amuc_1820	KH domain protein	279	634	262.5	-1.27	3	0.37109	1		Amuc_0545--Amuc_0546	intergenic	175	1729.1	1787.4	0.05	0	0.54029	1
Amuc_2164--Amuc_2165	intergenic	147	618.8	54.7	-3.5	3	0.37109	1		Amuc_0322	pseduogene	1231	1719.4	2841.7	0.72	0	0.54029	1
Amuc_1432--Amuc_1433	intergenic	373	612.2	144.9	-2.08	3	0.37109	1		Amuc_1040	DNA-directed RNA polymerase, beta' subunit	4194	1671.8	1671.2	0	1	0.54029	1
Amuc_2116--Amuc_2117	intergenic	39	604.9	199.4	-1.6	3	0.37109	1		Amuc_1196	hypothetical protein	564	1627.2	88.7	-4.2	2	0.54029	1
Amuc_1463	hypothetical protein	1788	598.3	1060.2	0.83	0	0.37109	1		Amuc_0397	Beta-N-acetylhexosaminidase	2166	1626.7	1253.1	-0.38	2	0.54029	1
Amuc_1114	outer membrane autotransporter barrel domain protein	4074	593.4	22.4	-4.73	3	0.37109	1		Amuc_0789--Amuc_0790	intergenic	383	1595.1	2395.9	0.59	0	0.54029	1
Amuc_0966	conserved hypothetical protein	744	589.1	952.1	0.69	0	0.37109	1		Amuc_0663	recA protein	1038	1593.5	786.4	-1.02	2	0.54029	1
Amuc_1446--Amuc_R0047	intergenic	444	583.6	652.6	0.16	0	0.37109	1		Amuc_2087	hypothetical protein	828	1530.1	1147.7	-0.41	2	0.54029	1
Amuc_0267--Amuc_0268	intergenic	108	578.9	513.4	-0.17	3	0.37109	1		Amuc_R0061	tRNA-Val	72	1470.4	286.6	-2.36	2	0.54029	1
Amuc_0446--Amuc_0447	intergenic	67	563.4	97.7	-2.53	3	0.37109	1		Amuc_1230--Amuc_R0041	intergenic	358	1434.6	876.5	-0.71	2	0.54029	1
Amuc_0396	type I phosphodiesterase/nucleotide pyrophosphatase	1413	558	477.8	-0.22	3	0.37109	1		Amuc_R0062	tRNA-Val	72	1419.9	128.2	-3.47	2	0.54029	1
Amuc_0486	ferric uptake regulator, Fur family	438	521.1	68.8	-2.92	3	0.37109	1		Amuc_1009	4Fe-4S ferredoxin iron-sulfur binding domain protein	1308	1401.8	2743.4	0.97	0	0.54029	1
Amuc_1592--Amuc_1593	intergenic	213	510.1	120.2	-2.08	3	0.37109	1		Amuc_1643	diacylglycerol kinase catalytic region	855	1363.8	1256	-0.12	1	0.54029	1
Amuc_R0056--Amuc_1850	intergenic	206	501.1	86	-2.54	3	0.37109	1		Amuc_0089	protein of unknown function DUF488	354	1274.5	311.4	-2.03	2	0.54029	1
Amuc_2030	transporter, hydrophobe/amphiphile efflux-1 (HAE1) family	3105	500.9	674.3	0.43	0	0.37109	1		Amuc_1506	ribosomal protein L17	408	1205.4	1252.3	0.06	1	0.54029	1
Amuc_2126--Amuc_2127	intergenic	612	499.7	21.7	-4.52	3	0.37109	1		Amuc_1373	hypothetical protein	234	1183.4	83.2	-3.83	2	0.54029	1
Amuc_0637	glycosyl transferase group 1	1158	493.3	78.6	-2.65	3	0.37109	1		Amuc_2006	integrase family protein	1068	1154.9	854.6	-0.43	2	0.54029	1
Amuc_0216	hypothetical protein	2535	487.5	688.3	0.5	0	0.37109	1		Amuc_1948	conserved hypothetical protein	612	1077.9	1247.5	0.21	0	0.54029	1
Amuc_1655	sulfatase	1662	452	704.2	0.64	0	0.37109	1		Amuc_1217	hypothetical protein	414	1055	997.2	-0.08	1	0.54029	1
Amuc_0445	GTP-binding protein YchF	1119	448.9	212.4	-1.08	3	0.37109	1		Amuc_1958--Amuc_R0057	intergenic	279	1054.8	1626.2	0.62	0	0.54029	1
Amuc_0788--Amuc_0789	intergenic	109	442.3	634	0.52	0	0.37109	1		Amuc_0292	hypothetical protein	840	1012.9	1032.4	0.03	1	0.54029	1
Amuc_0869	conserved hypothetical protein	1188	439.3	1021.5	1.22	0	0.37109	1		Amuc_0555--Amuc_0556	intergenic	136	977.1	4036.8	2.05	0	0.54029	1
Amuc_2056--Amuc_2057	intergenic	150	435.7	588	0.43	0	0.37109	1		Amuc_0899	hypothetical protein	1170	966.3	2745.9	1.51	0	0.54029	1
Amuc_0585	Pyridoxal-5'-phosphate-dependent protein beta subunit	1614	432.4	236.3	-0.87	3	0.37109	1		Amuc_2077	polysaccharide export protein	780	947.8	2617.9	1.47	0	0.54029	1
Amuc_1424	major facilitator superfamily MFS_1	2550	432.4	19	-4.5	3	0.37109	1		Amuc_0073	UBA/THIF-type NAD/FAD binding protein	792	935.6	57.4	-4.03	2	0.54029	1
Amuc_0778	hypothetical protein	1020	423.6	338.3	-0.32	3	0.37109	1		Amuc_1705--Amuc_R0051	intergenic	66	919.8	1062.5	0.21	0	0.54029	1
Amuc_1235	ribosomal protein S9	393	420.2	343.1	-0.29	3	0.37109	1		Amuc_1013	conserved hypothetical protein	594	909.7	1614	0.83	0	0.54029	1
Amuc_1171	protein of unknown function DUF418	1182	404.1	240.4	-0.75	3	0.37109	1		Amuc_1935--Amuc_1936	intergenic	326	856.2	739.8	-0.21	2	0.54029	1
Amuc_0848	ComEC/Rec2-related protein	2067	403.8	1132.9	1.49	0	0.37109	1		Amuc_1548	Ankyrin	1359	818.1	167.3	-2.29	2	0.54029	1
Amuc_0892--Amuc_0893	intergenic	44	399.7	247.8	-0.69	3	0.37109	1		Amuc_R0002--Amuc_0035	intergenic	777	798.1	1341.7	0.75	0	0.54029	1
Amuc_0793--Amuc_0794	intergenic	137	395.4	720.3	0.87	0	0.37109	1		Amuc_0048	MATE efflux family protein	1503	788	52.4	-3.91	2	0.54029	1
Amuc_0108	efflux transporter, RND family, MFP subunit	1374	392	302.7	-0.37	3	0.37109	1		Amuc_1706	protein of unknown function DUF218	651	784.7	756	-0.05	2	0.54029	1
Amuc_0512	ATP synthase F0, A subunit	936	390	8.3	-5.56	3	0.37109	1		Amuc_R0051--Amuc_1706	intergenic	318	754.2	1296.4	0.78	0	0.54029	1
Amuc_0240	twin-arginine translocation protein, TatA/E family subunit	297	380.5	75.4	-2.34	3	0.37109	1		Amuc_0310	thioesterase superfamily protein	408	739.2	244.4	-1.6	2	0.54029	1
Amuc_0420	hypothetical protein	1515	378.9	449.7	0.25	0	0.37109	1		Amuc_0235--Amuc_0236	intergenic	98	734.4	695.9	-0.08	1	0.54029	1
Amuc_1361	transcriptional regulator, XRE family	441	373.8	219.6	-0.77	3	0.37109	1		Amuc_1551--Amuc_1552	intergenic	217	723.7	1394.2	0.95	0	0.54029	1
Amuc_1305	binding-protein-dependent transport systems inner membrane component	2352	361.5	271.2	-0.41	3	0.37109	1		Amuc_1147	hypothetical protein	876	717.7	31.4	-4.52	2	0.54029	1
Amuc_0579--Amuc_0580	intergenic	266	359.8	557.7	0.63	0	0.37109	1		Amuc_1272	hypothetical protein	834	704.1	263.7	-1.42	2	0.54029	1
Amuc_0967--Amuc_0968	intergenic	399	350.9	305.4	-0.2	3	0.37109	1		Amuc_2074	Acetyltransferase including N-acetylase of ribosomal protein-like protein	594	692.2	806.1	0.22	0	0.54029	1
Amuc_0468--Amuc_0469	intergenic	56	350.6	559.1	0.67	0	0.37109	1		Amuc_1820	KH domain protein	279	676.7	373.3	-0.86	2	0.54029	1
Amuc_2104	2-succinyl-6-hydroxy-2, 4-cyclohexadiene-1-carboxylate synthase	1599	343.4	9.2	-5.22	3	0.37109	1		Amuc_0838	ATP-cone domain protein	489	671.7	571.4	-0.23	2	0.54029	1
Amuc_0850	RNA methyltransferase, TrmA family	1221	339.1	6.1	-5.79	3	0.37109	1		Amuc_1432--Amuc_1433	intergenic	373	656.6	207.9	-1.66	2	0.54029	1
Amuc_1834	hypothetical protein	510	331.6	4.6	-6.16	3	0.37109	1		Amuc_2164--Amuc_2165	intergenic	147	654	57.7	-3.5	2	0.54029	1
Amuc_0523	KpsF/GutQ family protein	969	327.5	36.8	-3.15	3	0.37109	1		Amuc_0020	major facilitator superfamily MFS_1	1152	645.4	756.6	0.23	0	0.54029	1
Amuc_1265--Amuc_1266	intergenic	162	323.8	255.3	-0.34	3	0.37109	1		Amuc_2116--Amuc_2117	intergenic	39	643.1	130.9	-2.3	2	0.54029	1
Amuc_1707--Amuc_1708	intergenic	667	317.3	484.6	0.61	0	0.37109	1		Amuc_1463	hypothetical protein	1788	638.8	853.8	0.42	0	0.54029	1
Amuc_1224	hypothetical protein	714	309	330.6	0.1	0	0.37109	1		Amuc_1114	outer membrane autotransporter barrel domain protein	4074	632.2	40.2	-3.98	2	0.54029	1
Amuc_0382--Amuc_0383	intergenic	879	307.9	15.9	-4.28	3	0.37109	1		Amuc_0966	conserved hypothetical protein	744	628.9	917	0.54	0	0.54029	1
Amuc_0278--Amuc_0279	intergenic	213	306.4	67.6	-2.18	3	0.37109	1		Amuc_1446--Amuc_R0047	intergenic	444	621.2	776.4	0.32	0	0.54029	1
Amuc_0050--Amuc_0051	intergenic	571	293.6	660.7	1.17	0	0.37109	1		Amuc_0267--Amuc_0268	intergenic	108	620.8	405.4	-0.61	2	0.54029	1
Amuc_2015--Amuc_2016	intergenic	44	291.9	139.3	-1.07	3	0.37109	1		Amuc_0446--Amuc_0447	intergenic	67	600.1	279.2	-1.1	2	0.54029	1
Amuc_2079--Amuc_2080	intergenic	35	291.6	4.6	-6	3	0.37109	1		Amuc_0396	type I phosphodiesterase/nucleotide pyrophosphatase	1413	592.1	365.3	-0.7	2	0.54029	1
Amuc_1647	pseduogene	267	290.3	649.7	1.16	0	0.37109	1		Amuc_1711	conserved hypothetical phage related protein	720	584	510.9	-0.19	2	0.54029	1
Amuc_1298	sulfate adenylyltransferase, large subunit	1725	290.1	123	-1.24	3	0.37109	1		Amuc_0486	ferric uptake regulator, Fur family	438	555	39.2	-3.82	2	0.54029	1
Amuc_0281--Amuc_0282	intergenic	232	287.3	99.5	-1.53	3	0.37109	1		Amuc_1592--Amuc_1593	intergenic	213	543.9	382.1	-0.51	2	0.54029	1
Amuc_1483	zinc/iron permease	810	285.6	751.2	1.4	0	0.37109	1		Amuc_R0056--Amuc_1850	intergenic	206	536.5	148.4	-1.85	2	0.54029	1
Amuc_1062	hypothetical protein	426	276.1	164.1	-0.75	3	0.37109	1		Amuc_2030	transporter, hydrophobe/amphiphile efflux-1 (HAE1) family	3105	536.1	717.8	0.42	0	0.54029	1
Amuc_0817	hypothetical protein	438	273.3	13.6	-4.33	3	0.37109	1		Amuc_2126--Amuc_2127	intergenic	612	535.7	32.7	-4.03	2	0.54029	1
Amuc_0481	hypothetical protein	465	270.1	240.9	-0.17	3	0.37109	1		Amuc_0637	glycosyl transferase group 1	1158	524.8	225.4	-1.22	2	0.54029	1
Amuc_1350	hypothetical protein	837	266.9	173	-0.63	3	0.37109	1		Amuc_0216	hypothetical protein	2535	519.8	682.4	0.39	0	0.54029	1
Amuc_1686	Beta-galactosidase	2340	264.7	1035.3	1.97	0	0.37109	1		Amuc_1655	sulfatase	1662	482.4	669.1	0.47	0	0.54029	1
Amuc_2166	oxidoreductase domain protein	1320	252.1	124.2	-1.02	3	0.37109	1		Amuc_0445	GTP-binding protein YchF	1119	479.4	180	-1.41	2	0.54029	1
Amuc_2071	cytochrome c assembly protein	2649	250.1	33.3	-2.91	3	0.37109	1		Amuc_0788--Amuc_0789	intergenic	109	471.8	634.7	0.43	0	0.54029	1
Amuc_0990	hypothetical protein	705	247.5	13.2	-4.23	3	0.37109	1		Amuc_0869	conserved hypothetical protein	1188	470.9	883.7	0.91	0	0.54029	1
Amuc_0882--Amuc_0883	intergenic	31	245.9	442.4	0.85	0	0.37109	1		Amuc_0585	Pyridoxal-5'-phosphate-dependent protein beta subunit	1614	463.9	264.8	-0.81	2	0.54029	1
Amuc_1655--Amuc_1656	intergenic	313	244.9	210.1	-0.22	3	0.37109	1		Amuc_1424	major facilitator superfamily MFS_1	2550	463.7	98.8	-2.23	2	0.54029	1
Amuc_1864--Amuc_1865	intergenic	35	244.4	179	-0.45	3	0.37109	1		Amuc_2056--Amuc_2057	intergenic	150	463.1	554.1	0.26	0	0.54029	1
Amuc_1119	hypothetical protein	1155	243.2	37.3	-2.71	3	0.37109	1		Amuc_0575--Amuc_0576	intergenic	206	461.9	467	0.02	1	0.54029	1
Amuc_1441	pseudouridine synthase	774	241.4	255.3	0.08	0	0.37109	1		Amuc_0778	hypothetical protein	1020	453.4	362.4	-0.32	2	0.54029	1
Amuc_0963	ABC transporter related	1770	239.2	72.8	-1.72	3	0.37109	1		Amuc_1887	MscS Mechanosensitive ion channel	2433	449.5	318.3	-0.5	2	0.54029	1
Amuc_0243--Amuc_0244	intergenic	118	236.5	110.9	-1.09	3	0.37109	1		Amuc_1235	ribosomal protein S9	393	447.5	208.5	-1.1	2	0.54029	1
Amuc_2158	NADH dehydrogenase (ubiquinone) 30 kDa subunit	582	235.1	17.4	-3.75	3	0.37109	1		Amuc_1171	protein of unknown function DUF418	1182	432.9	370	-0.23	2	0.54029	1
Amuc_0689	asparaginyl-tRNA synthetase	1368	224.9	327.9	0.54	0	0.37109	1		Amuc_0848	ComEC/Rec2-related protein	2067	429.6	1560.4	1.86	0	0.54029	1
Amuc_0526	DoxX family protein	462	217.8	306.9	0.5	0	0.37109	1		Amuc_0892--Amuc_0893	intergenic	44	428.3	350.8	-0.29	2	0.54029	1
Amuc_0548	MotA/TolQ/ExbB proton channel	789	217.2	1.2	-7.48	3	0.37109	1		Amuc_1538	OsmC family protein	408	425.6	464.6	0.13	0	0.54029	1
Amuc_2043	RND efflux system, outer membrane lipoprotein, NodT family	1431	217	341.9	0.66	0	0.37109	1		Amuc_0580	Entericidin EcnAB	141	425.3	411.6	-0.05	1	0.54029	1
Amuc_0186	glycoside hydrolase family 95	2364	214.1	288.3	0.43	0	0.37109	1		Amuc_0793--Amuc_0794	intergenic	137	422	591.7	0.49	0	0.54029	1
Amuc_0600	integrase family protein	1146	208.2	18.2	-3.51	3	0.37109	1		Amuc_0108	efflux transporter, RND family, MFP subunit	1374	418.8	209.8	-1	2	0.54029	1
Amuc_0827	osmosensitive K+ channel signal transduction histidine kinase	2676	206.8	8.7	-4.57	3	0.37109	1		Amuc_0512	ATP synthase F0, A subunit	936	417.8	10.6	-5.3	2	0.54029	1
Amuc_1957	membrane protein-like protein	1419	204	3.9	-5.72	3	0.37109	1		Amuc_0893	conserved hypothetical protein	441	413.2	600.3	0.54	0	0.54029	1
Amuc_1844--Amuc_1845	intergenic	267	201.1	244.8	0.28	0	0.37109	1		Amuc_0240	twin-arginine translocation protein, TatA/E family subunit	297	403.5	169.9	-1.25	2	0.54029	1
Amuc_1212	DEAD/DEAH box helicase domain protein	2097	198.2	72.1	-1.46	3	0.37109	1		Amuc_0420	hypothetical protein	1515	401	387.4	-0.05	1	0.54029	1
Amuc_0761	acyltransferase 3	2070	197.1	5.6	-5.13	3	0.37109	1		Amuc_1361	transcriptional regulator, XRE family	441	399.8	275.1	-0.54	2	0.54029	1
Amuc_0102	efflux transporter, RND family, MFP subunit	1395	196.2	294.4	0.59	0	0.37109	1		Amuc_1504--Amuc_1505	intergenic	272	396.1	392.8	-0.01	1	0.54029	1
Amuc_0602	hypothetical protein	1155	193.3	246.1	0.35	0	0.37109	1		Amuc_0550--Amuc_0551	intergenic	899	394.4	440	0.16	1	0.54029	1
Amuc_0107	transporter, hydrophobe/amphiphile efflux-1 (HAE1) family	3174	191.1	22.5	-3.09	3	0.37109	1		Amuc_1305	binding-protein-dependent transport systems inner membrane component	2352	386.8	269.9	-0.52	2	0.54029	1
Amuc_0588	hypothetical protein	129	188.7	98.2	-0.94	3	0.37109	1		Amuc_0579--Amuc_0580	intergenic	266	383.8	646.3	0.75	0	0.54029	1
Amuc_0937	metal dependent phosphohydrolase	1554	187	33.6	-2.48	3	0.37109	1		Amuc_0967--Amuc_0968	intergenic	399	376.1	296.4	-0.34	2	0.54029	1
Amuc_1153	potassium-transporting ATPase, C subunit	582	177.8	109.7	-0.7	3	0.37109	1		Amuc_0468--Amuc_0469	intergenic	56	374.3	518.2	0.47	0	0.54029	1
Amuc_1127--Amuc_1128	intergenic	188	176.7	197.3	0.16	0	0.37109	1		Amuc_2104	2-succinyl-6-hydroxy-2, 4-cyclohexadiene-1-carboxylate synthase	1599	366.3	23.2	-3.98	2	0.54029	1
Amuc_1499	putative sigma E regulatory protein, MucB/RseB	729	175.6	65.6	-1.42	3	0.37109	1		Amuc_0850	RNA methyltransferase, TrmA family	1221	361.6	92.9	-1.96	2	0.54029	1
Amuc_0842	zinc finger SWIM domain protein	687	170.8	2.6	-6.02	3	0.37109	1		Amuc_1834	hypothetical protein	510	353.1	4.4	-6.34	2	0.54029	1
Amuc_1664	hypothetical protein	621	170.7	159.3	-0.1	3	0.37109	1		Amuc_0603	hypothetical protein	540	352.6	554.9	0.65	0	0.54029	1
Amuc_1690	nucleotidyltransferase substrate binding protein, HI0074 family	405	169.4	3.3	-5.68	3	0.37109	1		Amuc_1321	alkyl hydroperoxide reductase/ Thiol specific antioxidant/ Mal allergen	621	347	342.6	-0.02	2	0.54029	1
Amuc_0371--Amuc_0372	intergenic	1181	163	106.3	-0.62	3	0.37109	1		Amuc_0523	KpsF/GutQ family protein	969	346.6	122.2	-1.5	2	0.54029	1
Amuc_0172	hypothetical protein	3897	162.4	3.1	-5.73	3	0.37109	1		Amuc_1265--Amuc_1266	intergenic	162	343.5	312	-0.14	1	0.54029	1
Amuc_0903	N-acetylmuramoyl-L-alanine amidase family 2	663	159.1	57.9	-1.46	3	0.37109	1		Amuc_1707--Amuc_1708	intergenic	667	337.4	459.7	0.45	0	0.54029	1
Amuc_1848	pseduogene	2199	156.3	116.2	-0.43	3	0.37109	1		Amuc_1224	hypothetical protein	714	329.4	322.3	-0.03	2	0.54029	1
Amuc_1397--Amuc_1398	intergenic	486	154.7	51.1	-1.6	3	0.37109	1		Amuc_0382--Amuc_0383	intergenic	879	328.3	15	-4.45	2	0.54029	1
Amuc_0715	hypothetical protein	639	154.5	173.7	0.17	0	0.37109	1		Amuc_0278--Amuc_0279	intergenic	213	327.9	203.4	-0.69	2	0.54029	1
Amuc_0687--Amuc_0688	intergenic	324	153.9	214.2	0.48	0	0.37109	1		Amuc_0050--Amuc_0051	intergenic	571	313.9	572.5	0.87	0	0.54029	1
Amuc_0249	conserved hypothetical protein	474	153.3	177.1	0.21	0	0.37109	1		Amuc_2015--Amuc_2016	intergenic	44	313.3	237.1	-0.4	2	0.54029	1
Amuc_0941	glycosyl transferase family 2	1128	146	5.5	-4.72	3	0.37109	1		Amuc_1298	sulfate adenylyltransferase, large subunit	1725	310.8	372.1	0.26	0	0.54029	1
Amuc_1519	helicase domain protein	3234	141.6	274.1	0.95	0	0.37109	1		Amuc_1647	pseduogene	267	310.2	529.1	0.77	0	0.54029	1
Amuc_0089--Amuc_0090	intergenic	333	140.9	112.9	-0.32	3	0.37109	1		Amuc_2079--Amuc_2080	intergenic	35	309.9	10.7	-4.85	2	0.54029	1
Amuc_0522	UBA/THIF-type NAD/FAD binding protein	777	140.3	61.5	-1.19	3	0.37109	1		Amuc_0281--Amuc_0282	intergenic	232	306.4	187.1	-0.71	2	0.54029	1
Amuc_1866	Biopolymer transport protein ExbD/TolR	426	139.9	226.3	0.69	0	0.37109	1		Amuc_1483	zinc/iron permease	810	305.3	683.2	1.16	0	0.54029	1
Amuc_1741	UTP--glucose-1-phosphate uridylyltransferase	1383	138.4	84.6	-0.71	3	0.37109	1		Amuc_1062	hypothetical protein	426	295.1	266.2	-0.15	1	0.54029	1
Amuc_1837--Amuc_1838	intergenic	211	137.6	299.4	1.12	0	0.37109	1		Amuc_0817	hypothetical protein	438	290.1	12	-4.6	2	0.54029	1
Amuc_1792	hypothetical protein	129	135.3	41.9	-1.69	3	0.37109	1		Amuc_0481	hypothetical protein	465	289.5	272.7	-0.09	2	0.54029	1
Amuc_0115--Amuc_0116	intergenic	279	134.9	16.8	-3.01	3	0.37109	1		Amuc_1686	Beta-galactosidase	2340	285.1	1146.5	2.01	0	0.54029	1
Amuc_2013--Amuc_2014	intergenic	33	133.9	3.1	-5.44	3	0.37109	1		Amuc_1350	hypothetical protein	837	283.5	162.4	-0.8	2	0.54029	1
Amuc_1217--Amuc_1218	intergenic	213	129.8	15.1	-3.1	3	0.37109	1		Amuc_2166	oxidoreductase domain protein	1320	270.8	144.5	-0.91	2	0.54029	1
Amuc_0432	GCN5-related N-acetyltransferase	513	128.4	64.3	-1	3	0.37109	1		Amuc_2071	cytochrome c assembly protein	2649	266.5	28	-3.25	2	0.54029	1
Amuc_0214--Amuc_0215	intergenic	124	126.1	382.3	1.6	0	0.37109	1		Amuc_0882--Amuc_0883	intergenic	31	264.5	446.9	0.76	0	0.54029	1
Amuc_2006--Amuc_2007	intergenic	582	125.6	3.3	-5.24	3	0.37109	1		Amuc_0990	hypothetical protein	705	264.2	236.7	-0.16	1	0.54029	1
Amuc_1331	major facilitator superfamily MFS_1	1317	124.1	2.2	-5.84	3	0.37109	1		Amuc_1864--Amuc_1865	intergenic	35	263.2	187.1	-0.49	2	0.54029	1
Amuc_1061	Outer membrane protein-like protein	1278	123.5	49	-1.33	3	0.37109	1		Amuc_1119	hypothetical protein	1155	260.6	17.8	-3.87	2	0.54029	1
Amuc_2098	acyltransferase 3	2046	123.1	302.6	1.3	0	0.37109	1		Amuc_1655--Amuc_1656	intergenic	313	258.4	237.6	-0.12	2	0.54029	1
Amuc_1081--Amuc_1082	intergenic	424	122.6	227.1	0.89	0	0.37109	1		Amuc_1441	pseudouridine synthase	774	258.3	251.8	-0.04	1	0.54029	1
Amuc_1054--Amuc_1055	intergenic	33	119.4	1.5	-6.31	3	0.37109	1		Amuc_0963	ABC transporter related	1770	255.8	112.4	-1.19	2	0.54029	1
Amuc_0829	hypothetical protein	777	115.8	38.2	-1.6	3	0.37109	1		Amuc_0243--Amuc_0244	intergenic	118	252.1	117.6	-1.1	2	0.54029	1
Amuc_1162	Threonine aldolase	1035	112.9	31.7	-1.83	3	0.37109	1		Amuc_2158	NADH dehydrogenase (ubiquinone) 30 kDa subunit	582	250.5	38.9	-2.69	2	0.54029	1
Amuc_2146	6-pyruvoyl-tetrahydropterin synthase-like protein	450	108.3	80.3	-0.43	3	0.37109	1		Amuc_0689	asparaginyl-tRNA synthetase	1368	242.3	299.5	0.31	0	0.54029	1
Amuc_1476	ribosomal protein S6	282	107.7	83.4	-0.37	3	0.37109	1		Amuc_1247	Na+/H+ antiporter NhaC	1323	240.7	267.9	0.15	0	0.54029	1
Amuc_0907	hypothetical protein	513	105.5	56.9	-0.89	3	0.37109	1		Amuc_0233	L-threonine 3-dehydrogenase	1035	239.7	199	-0.27	2	0.54029	1
Amuc_0839	hypothetical protein	525	105.3	2.5	-5.41	3	0.37109	1		Amuc_0526	DoxX family protein	462	232.3	402.8	0.79	0	0.54029	1
Amuc_1348	phage tape measure protein	2118	105.3	27.3	-1.95	3	0.37109	1		Amuc_2043	RND efflux system, outer membrane lipoprotein, NodT family	1431	230.7	364.1	0.66	0	0.54029	1
Amuc_1181	hypothetical protein	684	102.5	81.1	-0.34	3	0.37109	1		Amuc_0548	MotA/TolQ/ExbB proton channel	789	230.5	4.3	-5.74	2	0.54029	1
Amuc_0467	protein of unknown function DUF344	1341	100.6	34.7	-1.54	3	0.37109	1		Amuc_0186	glycoside hydrolase family 95	2364	228.9	244.7	0.1	1	0.54029	1
Amuc_1872	Polysulphide reductase NrfD	1344	100.3	14	-2.84	3	0.37109	1		Amuc_0600	integrase family protein	1146	222.8	27.8	-3	2	0.54029	1
Amuc_0464	hypothetical protein	627	99.3	7.2	-3.79	3	0.37109	1		Amuc_2077--Amuc_2078	intergenic	127	219.6	271.8	0.31	0	0.54029	1
Amuc_1440	nitroreductase	645	99	184.7	0.9	0	0.37109	1		Amuc_0827	osmosensitive K+ channel signal transduction histidine kinase	2676	219.2	38.2	-2.52	2	0.54029	1
Amuc_1381	ABC transporter related	1761	92	58.6	-0.65	3	0.37109	1		Amuc_1261	Aldose 1-epimerase	852	218.7	204.1	-0.1	2	0.54029	1
Amuc_1366--Amuc_1367	intergenic	149	90.7	16.1	-2.5	3	0.37109	1		Amuc_0870	Alkaline phosphatase	1143	217.7	184.2	-0.24	2	0.54029	1
Amuc_0859	anion transporter	1737	89.9	79.3	-0.18	3	0.37109	1		Amuc_1957	membrane protein-like protein	1419	215.9	5.8	-5.22	2	0.54029	1
Amuc_1867	peptide deformylase	546	89	30.6	-1.54	3	0.37109	1		Amuc_1844--Amuc_1845	intergenic	267	215.3	243.1	0.18	0	0.54029	1
Amuc_0502	putative transmembrane protein	1119	87.2	36.7	-1.25	3	0.37109	1		Amuc_1212	DEAD/DEAH box helicase domain protein	2097	212.6	76.6	-1.47	2	0.54029	1
Amuc_0788	Mg chelatase, subunit ChlI	1533	85.3	25	-1.77	3	0.37109	1		Amuc_0761	acyltransferase 3	2070	210	215.5	0.04	1	0.54029	1
Amuc_1489--Amuc_1490	intergenic	508	85.3	10.1	-3.08	3	0.37109	1		Amuc_0102	efflux transporter, RND family, MFP subunit	1395	209.6	292.3	0.48	0	0.54029	1
Amuc_0087--Amuc_0088	intergenic	80	83.8	11.6	-2.85	3	0.37109	1		Amuc_0602	hypothetical protein	1155	206.9	253.7	0.29	0	0.54029	1
Amuc_2091	hypothetical protein	1572	81.9	250.1	1.61	0	0.37109	1		Amuc_0107	transporter, hydrophobe/amphiphile efflux-1 (HAE1) family	3174	206.1	274.3	0.41	0	0.54029	1
Amuc_0228	hypothetical protein	1956	78.8	56.7	-0.47	3	0.37109	1		Amuc_0937	metal dependent phosphohydrolase	1554	201.6	50.3	-2	2	0.54029	1
Amuc_0443--Amuc_0444	intergenic	557	78.6	59.8	-0.4	3	0.37109	1		Amuc_0588	hypothetical protein	129	200.4	66	-1.6	2	0.54029	1
Amuc_1076	Glycosyltransferase-like protein	1194	78.5	1.2	-6.08	3	0.37109	1		Amuc_0035	hypothetical protein	411	199.5	125.6	-0.67	2	0.54029	1
Amuc_2107	hypothetical protein	4374	78.2	18.1	-2.11	3	0.37109	1		Amuc_2001	putative lipoprotein	2037	198.1	187.4	-0.08	2	0.54029	1
Amuc_1323	hypothetical protein	1557	76.9	42.3	-0.86	3	0.37109	1		Amuc_1644	transglutaminase domain protein	1137	196.2	196.6	0	1	0.54029	1
Amuc_0953	sulfatase	4242	75.8	56.7	-0.42	3	0.37109	1		Amuc_0690	hypothetical protein	1278	195.9	211.6	0.11	1	0.54029	1
Amuc_0246--Amuc_0247	intergenic	133	74.7	27.1	-1.47	3	0.37109	1		Amuc_1770	transcriptional regulator, AsnC family	483	195.4	236.6	0.28	0	0.54029	1
Amuc_0397--Amuc_0398	intergenic	191	74.2	2.8	-4.75	3	0.37109	1		Amuc_0562--Amuc_0563	intergenic	144	194.8	210.9	0.11	1	0.54029	1
Amuc_0539	glycoside hydrolase family 2 sugar binding	2739	74	53.1	-0.48	3	0.37109	1		Amuc_1127--Amuc_1128	intergenic	188	190.3	217.2	0.19	0	0.54029	1
Amuc_0506	ATP synthase F1, beta subunit	1419	73.9	14.5	-2.35	3	0.37109	1		Amuc_2143--Amuc_2144	intergenic	252	190.2	185.9	-0.03	1	0.54029	1
Amuc_1401	hydrogenase expression/formation protein HypD	1065	73.9	83	0.17	0	0.37109	1		Amuc_0271	ribosomal protein S16	240	189.4	120.3	-0.66	2	0.54029	1
Amuc_1151	potassium-transporting ATPase, A subunit	1707	72.3	86.5	0.26	0	0.37109	1		Amuc_1153	potassium-transporting ATPase, C subunit	582	189	205.7	0.12	1	0.54029	1
Amuc_1853	extracellular solute-binding protein family 5	2202	72.2	3.9	-4.19	3	0.37109	1		Amuc_1499	putative sigma E regulatory protein, MucB/RseB	729	188.2	114.7	-0.72	2	0.54029	1
Amuc_1829	class II aldolase/adducin family protein	813	72	3.7	-4.27	3	0.37109	1		Amuc_0634	glycosyl transferase family 8	945	187.5	222.6	0.25	0	0.54029	1
Amuc_0020--Amuc_0021	intergenic	146	71.9	64.3	-0.16	3	0.37109	1		Amuc_0842	zinc finger SWIM domain protein	687	183.9	6.6	-4.79	2	0.54029	1
Amuc_0136	conserved hypothetical protein-putative transmembrane protein	2196	70	7.8	-3.17	3	0.37109	1		Amuc_1690	nucleotidyltransferase substrate binding protein, HI0074 family	405	182.5	5.3	-5.1	2	0.54029	1
Amuc_0882	hypothetical protein	327	68.4	59.4	-0.2	3	0.37109	1		Amuc_1664	hypothetical protein	621	182.4	193.1	0.08	1	0.54029	1
Amuc_2064	hypothetical protein	255	67.3	44.5	-0.6	3	0.37109	1		Amuc_0172	hypothetical protein	3897	174.3	6.8	-4.68	2	0.54029	1
Amuc_1856	metallophosphoesterase	756	66.2	30.9	-1.1	3	0.37109	1		Amuc_0371--Amuc_0372	intergenic	1181	171.2	164.3	-0.06	1	0.54029	1
Amuc_0046--Amuc_R0004	intergenic	207	64.4	80.5	0.32	0	0.37109	1		Amuc_0903	N-acetylmuramoyl-L-alanine amidase family 2	663	167.9	90.4	-0.89	2	0.54029	1
Amuc_0274--Amuc_0275	intergenic	121	64.1	115.2	0.85	0	0.37109	1		Amuc_1848	pseduogene	2199	167.7	215.9	0.36	0	0.54029	1
Amuc_1451--Amuc_1452	intergenic	174	63.2	1.2	-5.77	3	0.37109	1		Amuc_0687--Amuc_0688	intergenic	324	166.7	176.9	0.09	0	0.54029	1
Amuc_0920	oxidoreductase domain protein	1419	62.7	38.8	-0.69	3	0.37109	1		Amuc_1397--Amuc_1398	intergenic	486	165.8	87.1	-0.93	2	0.54029	1
Amuc_R0062--Amuc_2071	intergenic	192	60.7	28.5	-1.09	3	0.37109	1		Amuc_0715	hypothetical protein	639	164.5	155.7	-0.08	1	0.54029	1
Amuc_2076--Amuc_2077	intergenic	1004	59.9	103.6	0.79	0	0.37109	1		Amuc_0249	conserved hypothetical protein	474	162.5	255.8	0.65	0	0.54029	1
Amuc_1960	PA14 domain protein	612	58.6	36.1	-0.7	3	0.37109	1		Amuc_0941	glycosyl transferase family 2	1128	154.4	5.7	-4.75	2	0.54029	1
Amuc_0944--Amuc_0945	intergenic	403	58.4	141.5	1.28	0	0.37109	1		Amuc_1866	Biopolymer transport protein ExbD/TolR	426	152.9	217.2	0.51	0	0.54029	1
Amuc_0149	metallophosphoesterase	981	57.2	34.9	-0.71	3	0.37109	1		Amuc_0239--Amuc_0240	intergenic	223	152.4	204.6	0.42	0	0.54029	1
Amuc_1627	peptidase M15D vanX D-ala-D-ala dipeptidase	738	57	7.3	-2.97	3	0.37109	1		Amuc_0522	UBA/THIF-type NAD/FAD binding protein	777	151.1	108.4	-0.48	2	0.54029	1
Amuc_1332--Amuc_1333	intergenic	269	55.6	43.5	-0.35	3	0.37109	1		Amuc_0089--Amuc_0090	intergenic	333	150.4	184.2	0.29	0	0.54029	1
Amuc_0480	Glycosyl hydrolase family 98 putative carbohydrate binding module	2382	55.4	34.9	-0.67	3	0.37109	1		Amuc_1145--Amuc_1146	intergenic	581	149.5	249.2	0.74	0	0.54029	1
Amuc_0500	GCN5-related N-acetyltransferase	498	54.9	86.5	0.66	0	0.37109	1		Amuc_1519	helicase domain protein	3234	149.3	236.7	0.67	0	0.54029	1
Amuc_2065--Amuc_2066	intergenic	461	53.9	7.9	-2.77	3	0.37109	1		Amuc_1528	V-type H(+)-translocating pyrophosphatase	2226	148.7	123.1	-0.27	2	0.54029	1
Amuc_0671--Amuc_0672	intergenic	526	53.7	24.2	-1.15	3	0.37109	1		Amuc_1741	UTP--glucose-1-phosphate uridylyltransferase	1383	148.6	115.5	-0.36	2	0.54029	1
Amuc_0123	pseduogene	1281	53.6	64.8	0.27	0	0.37109	1		Amuc_1837--Amuc_1838	intergenic	211	145.5	334.5	1.2	0	0.54029	1
Amuc_1301	cysteine synthase A	927	53	15.7	-1.76	3	0.37109	1		Amuc_0115--Amuc_0116	intergenic	279	145	30.6	-2.25	2	0.54029	1
Amuc_0014--Amuc_0015	intergenic	537	52.6	25.9	-1.02	3	0.37109	1		Amuc_1792	hypothetical protein	129	143.4	56.5	-1.34	2	0.54029	1
Amuc_0952--Amuc_0953	intergenic	177	51.1	35.8	-0.51	3	0.37109	1		Amuc_2013--Amuc_2014	intergenic	33	142.9	12.6	-3.51	2	0.54029	1
Amuc_2125--Amuc_2126	intergenic	414	51.1	45.8	-0.16	3	0.37109	1		Amuc_1747	cytidyltransferase-related domain protein	1353	141.8	120.6	-0.23	2	0.54029	1
Amuc_0765--Amuc_0766	intergenic	196	51	4.2	-3.6	3	0.37109	1		Amuc_0672--Amuc_0673	intergenic	530	139.5	114.7	-0.28	2	0.54029	1
Amuc_0240--Amuc_0241	intergenic	54	48.3	7.3	-2.73	3	0.37109	1		Amuc_1266--Amuc_1267	intergenic	510	139	135.9	-0.03	1	0.54029	1
Amuc_1387	hypothetical protein	2589	48	75.6	0.66	0	0.37109	1		Amuc_1507--Amuc_1508	intergenic	63	138.1	144.7	0.07	1	0.54029	1
Amuc_1071	hypothetical protein	981	47.4	32.3	-0.55	3	0.37109	1		Amuc_0432	GCN5-related N-acetyltransferase	513	137	89.3	-0.62	2	0.54029	1
Amuc_1565	alpha-2-macroglobulin domain protein	6375	47.3	22.3	-1.08	3	0.37109	1		Amuc_1217--Amuc_1218	intergenic	213	136.9	26.7	-2.36	2	0.54029	1
Amuc_0643	hypothetical protein	1587	46.6	12.2	-1.93	3	0.37109	1		Amuc_2006--Amuc_2007	intergenic	582	136.7	1.5	-6.51	2	0.54029	1
Amuc_0046	hypothetical protein	264	46.2	1.3	-5.17	3	0.37109	1		Amuc_0214--Amuc_0215	intergenic	124	133.4	275.7	1.05	0	0.54029	1
Amuc_2047	hypothetical protein	537	46.1	63.9	0.47	0	0.37109	1		Amuc_2098	acyltransferase 3	2046	133.1	250.3	0.91	0	0.54029	1
Amuc_0814--Amuc_0815	intergenic	88	45.9	30.9	-0.57	3	0.37109	1		Amuc_0150	hypothetical protein	1026	132.7	178.4	0.43	0	0.54029	1
Amuc_1290	protein of unknown function DUF323	3480	45.8	2.8	-4.06	3	0.37109	1		Amuc_1061	Outer membrane protein-like protein	1278	130.7	122.8	-0.09	1	0.54029	1
Amuc_1186--Amuc_1187	intergenic	20	41.3	5.1	-3.03	3	0.37109	1		Amuc_1081--Amuc_1082	intergenic	424	130.5	200.9	0.62	0	0.54029	1
Amuc_0881	hypothetical protein	381	41.2	51.4	0.32	0	0.37109	1		Amuc_1331	major facilitator superfamily MFS_1	1317	130.3	3.4	-5.26	2	0.54029	1
Amuc_0436--Amuc_0437	intergenic	127	40.4	35.8	-0.17	3	0.37109	1		Amuc_1054--Amuc_1055	intergenic	33	125.7	4.4	-4.85	2	0.54029	1
Amuc_1320	MscS Mechanosensitive ion channel	900	39.9	15.6	-1.36	3	0.37109	1		Amuc_1930	transport system permease protein	1008	124.3	119.4	-0.06	1	0.54029	1
Amuc_2017--Amuc_R0059	intergenic	131	39.6	3.6	-3.47	3	0.37109	1		Amuc_0829	hypothetical protein	777	123.9	54.9	-1.17	2	0.54029	1
Amuc_1220	Alpha-N-acetylglucosaminidase	2556	39.3	1.6	-4.62	3	0.37109	1		Amuc_1896--Amuc_1897	intergenic	128	121.4	112.8	-0.11	2	0.54029	1
Amuc_1178--Amuc_1179	intergenic	96	39	25.2	-0.63	3	0.37109	1		Amuc_1162	Threonine aldolase	1035	119.3	47.6	-1.32	2	0.54029	1
Amuc_1580--Amuc_1581	intergenic	143	39	55.8	0.52	0	0.37109	1		Amuc_0477	hypothetical protein	282	119	132.7	0.16	1	0.54029	1
Amuc_1526	Lipoate-protein ligase A-like protein	738	38.6	10.1	-1.94	3	0.37109	1		Amuc_0039--Amuc_0040	intergenic	460	116.5	148.8	0.35	0	0.54029	1
Amuc_1774	glycyl-tRNA synthetase	1575	38.5	9.4	-2.03	3	0.37109	1		Amuc_2146	6-pyruvoyl-tetrahydropterin synthase-like protein	450	114.8	69.9	-0.71	2	0.54029	1
Amuc_1885	exsB protein	669	37.6	21.8	-0.79	3	0.37109	1		Amuc_1476	ribosomal protein S6	282	114.5	75.3	-0.61	2	0.54029	1
Amuc_1904	hypothetical protein	588	36.5	59.6	0.71	0	0.37109	1		Amuc_1649	beta-phosphoglucomutase family hydrolase	606	114.3	113.8	-0.01	1	0.54029	1
Amuc_0752	metallophosphoesterase	849	35.9	27.9	-0.36	3	0.37109	1		Amuc_1348	phage tape measure protein	2118	114.2	40.9	-1.48	2	0.54029	1
Amuc_1225	Inorganic diphosphatase	1689	35.7	76.1	1.09	0	0.37109	1		Amuc_0907	hypothetical protein	513	113.4	89.1	-0.35	2	0.54029	1
Amuc_0116	FAD dependent oxidoreductase	1590	34.5	17	-1.02	3	0.37109	1		Amuc_0839	hypothetical protein	525	112.8	90.3	-0.32	1	0.54029	1
Amuc_1529	hypothetical protein	918	34.2	55.5	0.7	0	0.37109	1		Amuc_1420--Amuc_1421	intergenic	337	111.8	202	0.85	0	0.54029	1
Amuc_1190--Amuc_1191	intergenic	339	34	12.4	-1.45	3	0.37109	1		Amuc_1181	hypothetical protein	684	109.4	71.7	-0.61	2	0.54029	1
Amuc_2108	glycoside hydrolase family 16	957	34	4	-3.07	3	0.37109	1		Amuc_1872	Polysulphide reductase NrfD	1344	107.3	30.8	-1.8	2	0.54029	1
Amuc_0615--Amuc_0616	intergenic	138	33.7	17.7	-0.93	3	0.37109	1		Amuc_1440	nitroreductase	645	106.8	191.9	0.85	0	0.54029	1
Amuc_1996	conserved hypothetical protein	591	33.6	8.5	-1.98	3	0.37109	1		Amuc_0467	protein of unknown function DUF344	1341	106.5	66.8	-0.67	2	0.54029	1
Amuc_1514	hypothetical protein	1980	33	3.7	-3.16	3	0.37109	1		Amuc_0464	hypothetical protein	627	105.8	8	-3.73	2	0.54029	1
Amuc_0311	signal transduction histidine kinase, nitrogen specific, NtrB	1149	32.6	6.1	-2.41	3	0.37109	1		Amuc_1138	hypothetical protein	591	102.4	122.6	0.26	0	0.54029	1
Amuc_1894--Amuc_1895	intergenic	924	32	1.8	-4.14	3	0.37109	1		Amuc_1735	hypothetical protein	234	98.9	94.2	-0.07	2	0.54029	1
Amuc_1447	N-acetyl-gamma-glutamyl-phosphate reductase	1041	31.8	2.6	-3.59	3	0.37109	1		Amuc_1381	ABC transporter related	1761	98.3	47.1	-1.06	2	0.54029	1
Amuc_1408--Amuc_1409	intergenic	170	31.5	28.9	-0.13	3	0.37109	1		Amuc_0392	coagulation factor 5/8 type domain protein	2127	97.4	93.2	-0.06	1	0.54029	1
Amuc_2142	hypothetical protein	1482	31.3	42.4	0.44	0	0.37109	1		Amuc_1366--Amuc_1367	intergenic	149	97	45	-1.11	2	0.54029	1
Amuc_0769--Amuc_0770	intergenic	287	30.9	41.6	0.43	0	0.37109	1		Amuc_0859	anion transporter	1737	96.8	75.1	-0.37	2	0.54029	1
Amuc_1945--Amuc_1946	intergenic	401	30.5	2.5	-3.64	3	0.37109	1		Amuc_1867	peptide deformylase	546	95.2	29.3	-1.7	2	0.54029	1
Amuc_1291	putative surface layer protein, with cytochrome c domain	1860	30.2	18.1	-0.74	3	0.37109	1		Amuc_0502	putative transmembrane protein	1119	94.3	45.6	-1.05	2	0.54029	1
Amuc_1694	cytochrome d ubiquinol oxidase, subunit II	1035	29.6	18.6	-0.67	3	0.37109	1		Amuc_1377	DnaB domain protein helicase domain protein	1311	92.7	90.6	-0.03	1	0.54029	1
Amuc_0740	Haloacid dehalogenase domain protein hydrolase	636	29.5	26.1	-0.18	3	0.37109	1		Amuc_1489--Amuc_1490	intergenic	508	91.8	11.6	-2.98	2	0.54029	1
Amuc_2177--Amuc_2178	intergenic	19	29.5	7.4	-2.01	3	0.37109	1		Amuc_0788	Mg chelatase, subunit ChlI	1533	91.6	52.7	-0.8	2	0.54029	1
Amuc_1810	transcriptional regulator, MerR family	483	29.3	11.2	-1.39	3	0.37109	1		Amuc_0087--Amuc_0088	intergenic	80	89.7	17.3	-2.38	2	0.54029	1
Amuc_1547	conserved hypothetical protein	1785	29.1	19.5	-0.58	3	0.37109	1		Amuc_2022	Alkyl sulfatase and related hydrolase-like protein	1473	89.7	123.4	0.46	0	0.54029	1
Amuc_0604	hypothetical protein	387	28.9	7.2	-2.01	3	0.37109	1		Amuc_2091	hypothetical protein	1572	87.7	209.1	1.25	0	0.54029	1
Amuc_0408	ABC transporter related	786	28.5	12.2	-1.22	3	0.37109	1		Amuc_0228	hypothetical protein	1956	85.1	74	-0.2	2	0.54029	1
Amuc_0451--Amuc_0452	intergenic	415	28.3	36.4	0.36	0	0.37109	1		Amuc_1323	hypothetical protein	1557	83.7	54.1	-0.63	2	0.54029	1
Amuc_1716	Tetratricopeptide TPR_2 repeat protein	1665	28.2	33.4	0.24	0	0.37109	1		Amuc_2022--Amuc_2023	intergenic	233	83.7	82.2	-0.03	1	0.54029	1
Amuc_2153--Amuc_2154	intergenic	31	27.9	17.5	-0.67	3	0.37109	1		Amuc_0443--Amuc_0444	intergenic	557	83.6	68.6	-0.29	2	0.54029	1
Amuc_0563	hypothetical protein	681	27.5	10.8	-1.34	3	0.37109	1		Amuc_1076	Glycosyltransferase-like protein	1194	83	2.4	-5.1	2	0.54029	1
Amuc_1822--Amuc_1823	intergenic	379	27.1	58.6	1.11	0	0.37109	1		Amuc_2107	hypothetical protein	4374	83	39.9	-1.06	2	0.54029	1
Amuc_1298--Amuc_1299	intergenic	42	26.5	1.6	-4.05	3	0.37109	1		Amuc_1486	hypothetical protein	459	80.7	3.9	-4.37	2	0.54029	1
Amuc_0146	Alpha-L-fucosidase	2133	26.3	7.1	-1.89	3	0.37109	1		Amuc_0953	sulfatase	4242	80	70.8	-0.18	2	0.54029	1
Amuc_1357	hypothetical protein	408	25.3	9.9	-1.36	3	0.37109	1		Amuc_0397--Amuc_0398	intergenic	191	79.7	5.3	-3.91	2	0.54029	1
Amuc_1815	Beta-N-acetylhexosaminidase	2184	24.7	33.7	0.45	0	0.37109	1		Amuc_0246--Amuc_0247	intergenic	133	79.5	20.7	-1.94	2	0.54029	1
Amuc_1776	TPR repeat-containing protein	2412	24.4	1.8	-3.78	3	0.37109	1		Amuc_1401	hydrogenase expression/formation protein HypD	1065	79.5	55.5	-0.52	2	0.54029	1
Amuc_0344	lipolytic protein G-D-S-L family	729	23.8	7.2	-1.73	3	0.37109	1		Amuc_0539	glycoside hydrolase family 2 sugar binding	2739	79.2	79.5	0	1	0.54029	1
Amuc_0510	H+transporting two-sector ATPase B/B' subunit	525	23.8	7.4	-1.68	3	0.37109	1		Amuc_0506	ATP synthase F1, beta subunit	1419	78.8	45.3	-0.8	2	0.54029	1
Amuc_0238	beta-lactamase domain protein	1404	23.7	7.9	-1.58	3	0.37109	1		Amuc_1853	extracellular solute-binding protein family 5	2202	77.4	3.9	-4.31	2	0.54029	1
Amuc_1949	Chorismate binding-like protein	1014	22.8	16.7	-0.45	3	0.37109	1		Amuc_0020--Amuc_0021	intergenic	146	76.8	64.7	-0.25	2	0.54029	1
Amuc_1086--Amuc_1087	intergenic	95	22.6	63	1.48	0	0.37109	1		Amuc_1151	potassium-transporting ATPase, A subunit	1707	76.7	77	0.01	1	0.54029	1
Amuc_1760	ABC transporter related	876	22.2	1.3	-4.14	3	0.37109	1		Amuc_1751--Amuc_1752	intergenic	122	76.5	92.4	0.27	0	0.54029	1
Amuc_1591--Amuc_1592	intergenic	146	22	13.4	-0.72	3	0.37109	1		Amuc_1829	class II aldolase/adducin family protein	813	76.5	2.5	-4.94	2	0.54029	1
Amuc_1073	hypothetical protein	888	21.5	6.7	-1.68	3	0.37109	1		Amuc_0868	Beta-N-acetylhexosaminidase	1647	74.6	76.4	0.03	1	0.54029	1
Amuc_0680	conserved hypothetical protein	882	21.1	5	-2.08	3	0.37109	1		Amuc_0136	conserved hypothetical protein-putative transmembrane protein	2196	74.1	12.9	-2.52	2	0.54029	1
Amuc_1191	Holliday junction resolvase YqgF	423	21	15.6	-0.43	3	0.37109	1		Amuc_0882	hypothetical protein	327	73.5	61.1	-0.27	2	0.54029	1
Amuc_1982--Amuc_1983	intergenic	347	20.8	14.1	-0.57	3	0.37109	1		Amuc_2064	hypothetical protein	255	72.7	58.4	-0.32	1	0.54029	1
Amuc_0062	hypothetical protein	705	19.5	13.8	-0.49	3	0.37109	1		Amuc_1856	metallophosphoesterase	756	71.6	37.4	-0.94	2	0.54029	1
Amuc_0713--Amuc_0714	intergenic	91	19.2	3.4	-2.5	3	0.37109	1		Amuc_0046--Amuc_R0004	intergenic	207	70.4	73.1	0.05	0	0.54029	1
Amuc_1840--Amuc_1841	intergenic	96	19	3.3	-2.54	3	0.37109	1		Amuc_0274--Amuc_0275	intergenic	121	67.8	107.5	0.66	0	0.54029	1
Amuc_0567	hypothetical protein	888	18.1	1.3	-3.82	3	0.37109	1		Amuc_1451--Amuc_1452	intergenic	174	66.2	1.9	-5.1	2	0.54029	1
Amuc_1251	carbamoyl-phosphate synthase, large subunit	3201	18	24.4	0.43	0	0.37109	1		Amuc_0920	oxidoreductase domain protein	1419	65.8	38.4	-0.78	2	0.54029	1
Amuc_0035--Amuc_0036	intergenic	595	17.7	33.2	0.91	0	0.37109	1		Amuc_0700	hypothetical protein	417	64.4	60.3	-0.09	1	0.54029	1
Amuc_0141	hypothetical protein	219	17.7	10.6	-0.74	3	0.37109	1		Amuc_R0062--Amuc_2071	intergenic	192	63.9	27.1	-1.24	2	0.54029	1
Amuc_0530--Amuc_0531	intergenic	488	17.7	11.6	-0.61	3	0.37109	1		Amuc_0411	hypothetical protein	1440	63.3	74.2	0.23	0	0.54029	1
Amuc_1428	Phosphate acetyltransferase	1089	17.6	13.1	-0.43	3	0.37109	1		Amuc_1960	PA14 domain protein	612	63.3	35.8	-0.82	2	0.54029	1
Amuc_0542--Amuc_0543	intergenic	470	17.5	9.1	-0.94	3	0.37109	1		Amuc_2076--Amuc_2077	intergenic	1004	62.9	148.3	1.24	0	0.54029	1
Amuc_1867--Amuc_1868	intergenic	157	17.4	6.7	-1.37	3	0.37109	1		Amuc_0944--Amuc_0945	intergenic	403	62.3	121.8	0.97	0	0.54029	1
Amuc_1669	Beta-N-acetylhexosaminidase	1641	17.3	6.1	-1.5	3	0.37109	1		Amuc_0075	PfkB domain protein	1065	61.8	62	0.01	1	0.54029	1
Amuc_1315	Domain of unknown function DUF1848	912	17.2	3	-2.51	3	0.37109	1		Amuc_0149	metallophosphoesterase	981	60.4	34.9	-0.79	2	0.54029	1
Amuc_0288--Amuc_0289	intergenic	139	17	2.1	-3.05	3	0.37109	1		Amuc_1627	peptidase M15D vanX D-ala-D-ala dipeptidase	738	59.7	18.1	-1.73	2	0.54029	1
Amuc_0061	pseduogene	1074	16.9	24.2	0.52	0	0.37109	1		Amuc_0480	Glycosyl hydrolase family 98 putative carbohydrate binding module	2382	59	44.7	-0.4	2	0.54029	1
Amuc_1767--Amuc_1768	intergenic	23	16.5	8.2	-1	3	0.37109	1		Amuc_0500	GCN5-related N-acetyltransferase	498	58.8	95.1	0.69	0	0.54029	1
Amuc_2029	efflux transporter, RND family, MFP subunit	1134	16.3	1	-4.1	3	0.37109	1		Amuc_1695	cytochrome bd ubiquinol oxidase subunit I	1377	58.8	61.8	0.07	1	0.54029	1
Amuc_2100	aminoglycoside phosphotransferase	1146	16.1	22.3	0.47	0	0.37109	1		Amuc_1332--Amuc_1333	intergenic	269	58.6	53.3	-0.14	2	0.54029	1
Amuc_1088--Amuc_1089	intergenic	73	15.9	5.6	-1.5	3	0.37109	1		Amuc_0123	pseduogene	1281	58.3	57.4	-0.02	1	0.54029	1
Amuc_1344	hypothetical protein	516	15.4	6.3	-1.28	3	0.37109	1		Amuc_0418	Ankyrin	1056	58.1	41.5	-0.48	2	0.54029	1
Amuc_1751	glycoside hydrolase family 13 domain protein	2034	15.4	3.3	-2.23	3	0.37109	1		Amuc_2065--Amuc_2066	intergenic	461	57.3	13.9	-2.05	2	0.54029	1
Amuc_0051	single-stranded-DNA-specific exonuclease RecJ	1737	15.1	11.9	-0.34	3	0.37109	1		Amuc_0671--Amuc_0672	intergenic	526	57	38.7	-0.56	2	0.54029	1
Amuc_1432	putative lipoprotein	429	15	9.9	-0.6	3	0.37109	1		Amuc_1301	cysteine synthase A	927	56.7	56.6	0	1	0.54029	1
Amuc_0539--Amuc_0540	intergenic	267	14.6	1.8	-3.01	3	0.37109	1		Amuc_1422	recG	3174	56.7	60.9	0.1	1	0.54029	1
Amuc_0468	transcriptional regulator, DeoR family	747	14.4	3	-2.24	3	0.37109	1		Amuc_0952--Amuc_0953	intergenic	177	55.7	45.2	-0.3	2	0.54029	1
Amuc_0858	cyclic nucleotide-binding protein	1440	14.4	32.4	1.17	0	0.37109	1		Amuc_2125--Amuc_2126	intergenic	414	55.5	46.9	-0.24	2	0.54029	1
Amuc_1692	2-oxoglutarate dehydrogenase, E2 subunit, dihydrolipoamide succinyltransferase	1089	14.4	9.2	-0.65	3	0.37109	1		Amuc_0014--Amuc_0015	intergenic	537	55.3	46.7	-0.24	2	0.54029	1
Amuc_0524	hypothetical protein	783	14.3	5.5	-1.39	3	0.37109	1		Amuc_0765--Amuc_0766	intergenic	196	53.5	10.5	-2.35	2	0.54029	1
Amuc_0757	glycosyl transferase family 2	1152	14	5.3	-1.41	3	0.37109	1		Amuc_1387	hypothetical protein	2589	50.9	70.6	0.47	0	0.54029	1
Amuc_0366	transcriptional regulator, NifA subfamily, Fis Family	1524	13.6	9.2	-0.55	3	0.37109	1		Amuc_1565	alpha-2-macroglobulin domain protein	6375	50.6	26	-0.96	2	0.54029	1
Amuc_1205--Amuc_1206	intergenic	242	13.4	7.7	-0.79	3	0.37109	1		Amuc_0374	DNA polymerase III, alpha subunit	3522	50.5	42	-0.27	2	0.54029	1
Amuc_1903	conserved hypothetical protein	1005	13.4	2.4	-2.49	3	0.37109	1		Amuc_1071	hypothetical protein	981	50.3	26.3	-0.93	2	0.54029	1
Amuc_1686--Amuc_1687	intergenic	255	13.3	10	-0.41	3	0.37109	1		Amuc_0240--Amuc_0241	intergenic	54	49.8	14.6	-1.77	2	0.54029	1
Amuc_1700	tryptophan synthase, beta subunit	1221	13.3	7.4	-0.86	3	0.37109	1		Amuc_0643	hypothetical protein	1587	49.1	8.1	-2.6	2	0.54029	1
Amuc_1816	conserved hypothetical protein	948	13.1	6.1	-1.09	3	0.37109	1		Amuc_1290	protein of unknown function DUF323	3480	48.9	1.4	-5.1	2	0.54029	1
Amuc_0767	conserved hypothetical protein	483	12.9	7.1	-0.86	3	0.37109	1		Amuc_0046	hypothetical protein	264	48.6	4.3	-3.49	2	0.54029	1
Amuc_1336	peptidase S49	741	12.9	4.3	-1.59	3	0.37109	1		Amuc_0814--Amuc_0815	intergenic	88	48.6	34.7	-0.49	2	0.54029	1
Amuc_1254	60 kDa inner membrane insertion protein	1884	12.6	2	-2.69	3	0.37109	1		Amuc_2047	hypothetical protein	537	48	79.6	0.73	0	0.54029	1
Amuc_0694	hypothetical protein	1182	12.5	8.9	-0.48	3	0.37109	1		Amuc_0671	3-dehydroquinate synthase	1161	47.6	35.2	-0.43	2	0.54029	1
Amuc_1827	Pirin domain protein	696	11.9	9.2	-0.38	3	0.37109	1		Amuc_1985	hypothetical protein	2544	46.8	75.5	0.69	0	0.54029	1
Amuc_0697	beta-glucanase precursor	1143	11.8	1.3	-3.22	3	0.37109	1		Amuc_0152	Tubulin/FtsZ GTPase	1455	44.3	42.1	-0.07	1	0.54029	1
Amuc_1666	glycoside hydrolase family 2 TIM barrel	3867	11.8	3.9	-1.6	3	0.37109	1		Amuc_0881	hypothetical protein	381	44.3	67.2	0.6	0	0.54029	1
Amuc_1593--Amuc_1594	intergenic	94	11.7	1.3	-3.21	3	0.37109	1		Amuc_0472	GTPase EngC	1119	44.2	14.8	-1.57	2	0.54029	1
Amuc_1209--Amuc_1210	intergenic	279	11.5	8.5	-0.44	3	0.37109	1		Amuc_1186--Amuc_1187	intergenic	20	44.1	19.7	-1.16	2	0.54029	1
Amuc_1089	FeoA family protein	228	11.4	5.6	-1.03	3	0.37109	1		Amuc_0436--Amuc_0437	intergenic	127	43	46.8	0.12	0	0.54029	1
Amuc_1654--Amuc_1655	intergenic	187	11.4	7.2	-0.67	3	0.37109	1		Amuc_1320	MscS Mechanosensitive ion channel	900	42.8	25	-0.78	2	0.54029	1
Amuc_0050	pseduogene	847	11.3	5.8	-0.97	3	0.37109	1		Amuc_2017--Amuc_R0059	intergenic	131	42.5	2.9	-3.86	2	0.54029	1
Amuc_2131	hydrogenase maturation protease	543	11.1	17.1	0.62	0	0.37109	1		Amuc_0024	protein of unknown function DUF204	597	42.3	38.2	-0.15	1	0.54029	1
Amuc_0208	glucose-1-phosphate thymidylyltransferase	861	11	4.1	-1.41	3	0.37109	1		Amuc_1580--Amuc_1581	intergenic	143	41.7	69	0.73	0	0.54029	1
Amuc_2055	conserved hypothetical protein	342	10.8	15.2	0.5	0	0.37109	1		Amuc_1178--Amuc_1179	intergenic	96	41.6	21.3	-0.96	2	0.54029	1
Amuc_0909	protein of unknown function UPF0027	1113	10.6	18	0.76	0	0.37109	1		Amuc_1220	Alpha-N-acetylglucosaminidase	2556	41	2.4	-4.1	2	0.54029	1
Amuc_0109	transcriptional regulator, MarR family	423	792	920	0.22	48	0.38255	1		Amuc_1526	Lipoate-protein ligase A-like protein	738	41	24.1	-0.77	2	0.54029	1
Amuc_0354	hypothetical protein	1287	1318.8	216.6	-2.61	9	0.40184	1		Amuc_1774	glycyl-tRNA synthetase	1575	40.3	7.7	-2.39	2	0.54029	1
Amuc_0975--Amuc_0976	intergenic	65	52.7	34.7	-0.61	9	0.40184	1		Amuc_1885	exsB protein	669	40.2	29.3	-0.46	2	0.54029	1
Amuc_0215--Amuc_0216	intergenic	597	21324.3	8098.2	-1.4	9	0.40466	1		Amuc_0752	metallophosphoesterase	849	39	39.5	0.02	1	0.54029	1
Amuc_1229--Amuc_1230	intergenic	44	3892.3	44.3	-6.46	9	0.40466	1		Amuc_1904	hypothetical protein	588	38.7	49.5	0.35	0	0.54029	1
Amuc_R0059	tRNA-Gln	72	3174.2	1153.3	-1.46	9	0.40466	1		Amuc_0330	hypothetical protein	444	38.6	61.5	0.67	0	0.54029	1
Amuc_1765	ErfK/YbiS/YcfS/YnhG family protein	855	1612.1	494.2	-1.71	9	0.40466	1		Amuc_0635	hypothetical protein	1245	38.6	21.5	-0.84	2	0.54029	1
Amuc_1187--Amuc_1188	intergenic	335	1564.8	1222.9	-0.36	9	0.40466	1		Amuc_1225	Inorganic diphosphatase	1689	37.4	91.6	1.29	0	0.54029	1
Amuc_0127	transposase IS3/IS911 family protein	378	963.8	257.2	-1.91	9	0.40466	1		Amuc_1529	hypothetical protein	918	37.4	69.9	0.9	0	0.54029	1
Amuc_0969	galactokinase	1176	781	286.4	-1.45	9	0.40466	1		Amuc_2108	glycoside hydrolase family 16	957	37.2	1.4	-4.7	2	0.54029	1
Amuc_1173	conserved hypothetical protein	996	507.5	27.2	-4.22	9	0.40466	1		Amuc_0116	FAD dependent oxidoreductase	1590	36.6	13.8	-1.41	2	0.54029	1
Amuc_1059--Amuc_1060	intergenic	87	489.6	121.3	-2.01	9	0.40466	1		Amuc_0615--Amuc_0616	intergenic	138	36.3	26	-0.48	2	0.54029	1
Amuc_0754	glycosyl transferase family 2	1023	489.4	74.3	-2.72	9	0.40466	1		Amuc_1996	conserved hypothetical protein	591	36.1	9.7	-1.9	2	0.54029	1
Amuc_1833	L-fucose transporter	1932	247.4	514.7	1.06	3	0.40466	1		Amuc_1190--Amuc_1191	intergenic	339	35.5	12.5	-1.51	2	0.54029	1
Amuc_1832	L-fucose isomerase	1776	217.8	184.9	-0.24	9	0.40466	1		Amuc_1514	hypothetical protein	1980	35.4	5.2	-2.75	2	0.54029	1
Amuc_0284	hypothetical protein	441	214.2	413.7	0.95	3	0.40466	1		Amuc_1894--Amuc_1895	intergenic	924	34.4	2.4	-3.82	2	0.54029	1
Amuc_1676	Eco57I restriction endonuclease	1995	213.4	481.4	1.17	3	0.40466	1		Amuc_0311	signal transduction histidine kinase, nitrogen specific, NtrB	1149	34.1	7.2	-2.23	2	0.54029	1
Amuc_0334	protein of unknown function DUF214	2823	208.6	155.8	-0.42	9	0.40466	1		Amuc_1447	N-acetyl-gamma-glutamyl-phosphate reductase	1041	34	2.4	-3.85	2	0.54029	1
Amuc_1300	adenylylsulfate reductase, thioredoxin dependent	681	192	59.1	-1.7	9	0.40466	1		Amuc_1408--Amuc_1409	intergenic	170	33.6	41.9	0.32	0	0.54029	1
Amuc_0922	metallophosphoesterase	1455	186	667.6	1.84	3	0.40466	1		Amuc_2142	hypothetical protein	1482	33.3	48	0.53	0	0.54029	1
Amuc_1244	N-acetylmuramoyl-L-alanine amidase family 2	729	161.8	44.7	-1.85	9	0.40466	1		Amuc_0769--Amuc_0770	intergenic	287	32.9	47	0.52	0	0.54029	1
Amuc_1143	YD repeat protein	5973	159.6	137.3	-0.22	9	0.40466	1		Amuc_1945--Amuc_1946	intergenic	401	32.1	2.4	-3.77	2	0.54029	1
Amuc_2163	Sel1 domain protein repeat-containing protein	2760	152.4	45.6	-1.74	9	0.40466	1		Amuc_2177--Amuc_2178	intergenic	19	32.1	13.9	-1.21	2	0.54029	1
Amuc_2159	hypothetical protein	798	147.5	41.4	-1.83	9	0.40466	1		Amuc_1291	putative surface layer protein, with cytochrome c domain	1860	32	12.5	-1.35	2	0.54029	1
Amuc_1693	2-oxoglutarate dehydrogenase, E1 subunit	2763	136.4	88.5	-0.62	9	0.40466	1		Amuc_1694	cytochrome d ubiquinol oxidase, subunit II	1035	32	17.7	-0.85	2	0.54029	1
Amuc_0431	pyruvate kinase	1419	131.1	109.6	-0.26	9	0.40466	1		Amuc_0693	conserved hypothetical protein	678	31.5	17.7	-0.83	2	0.54029	1
Amuc_0377	transcriptional regulator, TetR family	672	118.5	75.2	-0.66	9	0.40466	1		Amuc_0740	Haloacid dehalogenase domain protein hydrolase	636	31.2	38.7	0.31	1	0.54029	1
Amuc_1596	protein of unknown function DUF111	1218	108.3	138.6	0.36	3	0.40466	1		Amuc_1810	transcriptional regulator, MerR family	483	30.9	14.9	-1.05	2	0.54029	1
Amuc_0473	hypothetical protein	969	104.5	179.4	0.78	3	0.40466	1		Amuc_1547	conserved hypothetical protein	1785	30.7	24.2	-0.34	2	0.54029	1
Amuc_1820--Amuc_1821	intergenic	328	101.9	151.6	0.57	3	0.40466	1		Amuc_0408	ABC transporter related	786	30.5	16.2	-0.91	2	0.54029	1
Amuc_0750--Amuc_0751	intergenic	84	93.2	63.7	-0.55	9	0.40466	1		Amuc_0604	hypothetical protein	387	30.1	4.8	-2.64	2	0.54029	1
Amuc_0865	Rubrerythrin	546	75.6	89.4	0.24	3	0.40466	1		Amuc_2153--Amuc_2154	intergenic	31	30.1	25	-0.27	2	0.54029	1
Amuc_0133	parB-like partition protein	882	75.5	38.4	-0.97	9	0.40466	1		Amuc_0853	hypothetical protein	1461	29.9	29.9	0	1	0.54029	1
Amuc_0197--Amuc_0198	intergenic	112	73.9	48.5	-0.61	9	0.40466	1		Amuc_0451--Amuc_0452	intergenic	415	29.7	33.3	0.16	0	0.54029	1
Amuc_1726	NAD-dependent epimerase/dehydratase	930	52.9	14.3	-1.89	9	0.40466	1		Amuc_0563	hypothetical protein	681	29.3	14.9	-0.98	2	0.54029	1
Amuc_0888--Amuc_0889	intergenic	293	49.8	26.5	-0.91	9	0.40466	1		Amuc_1822--Amuc_1823	intergenic	379	29.2	45.3	0.63	0	0.54029	1
Amuc_2050	protein of unknown function DUF1568	1008	44	89.3	1.02	3	0.40466	1		Amuc_1716	Tetratricopeptide TPR_2 repeat protein	1665	28.9	21.8	-0.41	2	0.54029	1
Amuc_0332	hypothetical protein	447	37.3	23.7	-0.66	9	0.40466	1		Amuc_0146	Alpha-L-fucosidase	2133	28.3	12.6	-1.17	2	0.54029	1
Amuc_1219	hypothetical protein	561	34.6	31.2	-0.15	9	0.40466	1		Amuc_1166	hypothetical protein	867	28.3	20.1	-0.5	2	0.54029	1
Amuc_1129	hypothetical protein	819	32.2	20	-0.69	9	0.40466	1		Amuc_1298--Amuc_1299	intergenic	42	28.1	7.2	-1.95	2	0.54029	1
Amuc_0836	ATP-dependent chaperone ClpB	2580	150.1	96.3	-0.64	115	0.42076	1		Amuc_1357	hypothetical protein	408	27.6	12	-1.2	2	0.54029	1
Amuc_1052	trigger factor	1308	513	516.6	0.01	176	0.42575	1		Amuc_1815	Beta-N-acetylhexosaminidase	2184	26.3	37.3	0.51	0	0.54029	1
Amuc_0235	alpha-glucan phosphorylase	1662	11129	16150.2	0.54	1206	0.42682	1		Amuc_0344	lipolytic protein G-D-S-L family	729	25.8	6.2	-2.06	2	0.54029	1
Amuc_0770	nitroreductase	651	423.9	580.7	0.45	17	0.43056	1		Amuc_0510	H+transporting two-sector ATPase B/B' subunit	525	25.5	16	-0.67	2	0.54029	1
Amuc_0229	hypothetical protein	495	288	263	-0.13	31	0.43056	1		Beg--Amuc_R0001	intergenic	504	25.4	26	0.03	0	0.54029	1
Amuc_0787	Rhomboid family protein	873	201.3	111.2	-0.86	31	0.43056	1		Amuc_1776	TPR repeat-containing protein	2412	25.3	1.9	-3.72	2	0.54029	1
Amuc_2176	excinuclease ABC, A subunit	5520	78.6	62.9	-0.32	31	0.43056	1		Amuc_0238	beta-lactamase domain protein	1404	25.1	7.2	-1.81	2	0.54029	1
Amuc_2156--Amuc_2157	intergenic	951	73.4	87.6	0.25	17	0.43056	1		Amuc_1086--Amuc_1087	intergenic	95	24.8	67.7	1.45	0	0.54029	1
Amuc_1032	Beta-N-acetylhexosaminidase	1554	264.3	234.4	-0.17	47	0.43211	1		Amuc_1949	Chorismate binding-like protein	1014	24.6	16.9	-0.54	2	0.54029	1
Amuc_2072	Rubrerythrin	573	4868	3043.4	-0.68	66	0.44328	1		Amuc_1056--Amuc_1057	intergenic	253	24.2	21.9	-0.14	1	0.54029	1
Amuc_0283	hypothetical protein	261	4100.5	6579	0.68	9	0.45954	1		Amuc_1591--Amuc_1592	intergenic	146	23.8	13.3	-0.84	2	0.54029	1
Amuc_1705	Endoribonuclease L-PSP	468	1067.1	250.7	-2.09	18	0.45954	1		Amuc_0889	efflux transporter, RND family, MFP subunit	1152	23.6	21.5	-0.14	1	0.54029	1
Amuc_0064	5-oxopent-3-ene-1,2,5-tricarboxylatedecarboxylase	876	393.4	394	0	18	0.45954	1		Amuc_1099	hypothetical protein	1011	23.5	1.4	-4.04	2	0.54029	1
Amuc_0946	DJ-1 family protein	561	317	429.7	0.44	9	0.45954	1		Amuc_1760	ABC transporter related	876	23.3	0.5	-5.54	2	0.54029	1
Amuc_0241	Sel1 domain protein repeat-containing protein	1440	260.7	347.6	0.41	9	0.45954	1		Amuc_1073	hypothetical protein	888	23.1	10.7	-1.11	2	0.54029	1
Amuc_0914	Cupin 2 conserved barrel domain protein	336	216.7	255.3	0.24	18	0.45954	1		Amuc_0680	conserved hypothetical protein	882	22.8	4.3	-2.4	2	0.54029	1
Amuc_1253	Glutamate synthase (ferredoxin)	4437	194.1	153.7	-0.34	18	0.45954	1		Amuc_1191	Holliday junction resolvase YqgF	423	22.7	7.7	-1.57	2	0.54029	1
Amuc_0906	methionine-R-sulfoxide reductase	1125	173.2	102.6	-0.76	18	0.45954	1		Amuc_1982--Amuc_1983	intergenic	347	22.6	20.2	-0.16	2	0.54029	1
Amuc_0244	tRNA (guanine-N1)-methyltransferase	717	157.4	190.3	0.27	9	0.45954	1		Amuc_1835	Exo-alpha-sialidase	2022	22.1	3.4	-2.72	2	0.54029	1
Amuc_1268	L-serine dehydratase 1	1377	156.3	124	-0.33	18	0.45954	1		Amuc_1402	hydrogenase expression/formation protein HypE	1032	21.8	11.6	-0.92	2	0.54029	1
Amuc_1126	dimethyladenosine transferase	1377	95.7	63.3	-0.6	18	0.45954	1		Amuc_1603	hypothetical protein	882	21.8	16.6	-0.39	1	0.54029	1
Amuc_0360	hypothetical protein	552	5689.8	4460.9	-0.35	174	0.46294	1		Amuc_0062	hypothetical protein	705	20.9	10.1	-1.06	2	0.54029	1
Amuc_0999	sigma 54 modulation protein/ribosomal protein S30EA	591	250.8	206.7	-0.28	113	0.47271	1		Amuc_0713--Amuc_0714	intergenic	91	20	3.8	-2.39	2	0.54029	1
Amuc_1258	glutamine synthetase catalytic region	2109	705.6	1134.2	0.68	65	0.48393	1		Amuc_0401	hypothetical protein	594	19.9	19	-0.07	1	0.54029	1
Amuc_1282	peptidylprolyl isomerase FKBP-type	831	2534.4	3187.2	0.33	29	0.48499	1		Amuc_1840--Amuc_1841	intergenic	96	19.9	10.2	-0.97	2	0.54029	1
Amuc_0355	hypothetical protein	513	1040.7	935.5	-0.15	46	0.48499	1		Amuc_1976	Sel1 domain protein repeat-containing protein	1086	19.8	1.4	-3.8	2	0.54029	1
Amuc_1767	hypothetical protein	888	478.1	707.5	0.57	29	0.48499	1		Amuc_0368	hypothetical protein	852	19.6	23.2	0.24	0	0.54029	1
Amuc_2070	Catalase	2253	125.4	82.6	-0.6	46	0.48499	1		Amuc_2000	major facilitator superfamily MFS_1	1182	19.5	26.5	0.44	0	0.54029	1
Amuc_0581	diaminopimelate dehydrogenase	879	2994.3	5197.8	0.8	128	0.50187	1		Amuc_1251	carbamoyl-phosphate synthase, large subunit	3201	19.4	25.1	0.37	0	0.54029	1
Amuc_1414	polysaccharide export protein	603	423.6	1012.5	1.26	18	0.50479	1		Amuc_0321--Amuc_0322	intergenic	466	19.3	1.9	-3.32	2	0.54029	1
Amuc_1616	polysaccharide deacetylase	1464	139.9	64.9	-1.11	30	0.50479	1		Amuc_0530--Amuc_0531	intergenic	488	19.3	13.5	-0.52	2	0.54029	1
Amuc_0976	hypothetical protein	567	62	45.1	-0.46	30	0.50479	1		Amuc_0567	hypothetical protein	888	19.1	1.4	-3.74	2	0.54029	1
Amuc_0833	Cupin 2 conserved barrel domain protein	351	699.9	1015.6	0.54	30	0.54119	1		Amuc_0141	hypothetical protein	219	18.9	21.1	0.15	1	0.54029	1
Amuc_0435	hypothetical protein	882	3516.2	4053.9	0.21	242	0.54376	1		Amuc_0166	twitching motility protein	1092	18.9	0.5	-5.24	2	0.54029	1
Amuc_0336	TonB-dependent receptor	2220	1158	1404.4	0.28	1011	0.56117	1		Amuc_1428	Phosphate acetyltransferase	1089	18.9	15.6	-0.28	1	0.54029	1
Amuc_0952	hypothetical protein	756	6558.4	10367.6	0.66	226	0.56829	1		Amuc_2172	GCN5-related N-acetyltransferase	498	18.7	18.6	-0.01	1	0.54029	1
Amuc_0267	hypothetical protein	489	3162.7	764.1	-2.05	17	0.5791	1		Amuc_1867--Amuc_1868	intergenic	157	18.6	4.3	-2.11	2	0.54029	1
Amuc_1411--Amuc_1412	intergenic	22	757.7	1616.9	1.09	10	0.5791	1		Amuc_0288--Amuc_0289	intergenic	139	18.5	1	-4.21	2	0.54029	1
Amuc_1127	hypothetical protein	459	345.5	494	0.52	10	0.5791	1		Amuc_0035--Amuc_0036	intergenic	595	18.4	26.9	0.55	0	0.54029	1
Amuc_0891	hypothetical protein	600	249.2	366.4	0.56	10	0.5791	1		Amuc_0542--Amuc_0543	intergenic	470	18.4	10	-0.88	2	0.54029	1
Amuc_0820	ErfK/YbiS/YcfS/YnhG family protein	729	244.6	208.1	-0.23	17	0.5791	1		Amuc_1315	Domain of unknown function DUF1848	912	18.4	3.8	-2.27	2	0.54029	1
Amuc_1360--Amuc_1361	intergenic	63	175.9	132.5	-0.41	17	0.5791	1		Amuc_1669	Beta-N-acetylhexosaminidase	1641	18.1	3.9	-2.23	2	0.54029	1
Amuc_0772	phosphoglycerate mutase 1 family	1803	159.4	183.2	0.2	10	0.5791	1		Amuc_0061	pseduogene	1074	18	42.1	1.23	0	0.54029	1
Amuc_2126	hypothetical protein	675	41.3	33.9	-0.28	17	0.5791	1		Amuc_1767--Amuc_1768	intergenic	23	17.5	6.8	-1.36	2	0.54029	1
Amuc_1118	sulfatase	1884	107.1	71.6	-0.58	29	0.58527	1		Amuc_0337	Prephenate dehydrogenase	885	17.4	13.9	-0.33	2	0.54029	1
Amuc_0456	DoxX family protein	459	31.7	24.1	-0.39	29	0.58527	1		Amuc_1177	Lipocalin family protein	507	17.4	17.5	0.01	1	0.54029	1
Amuc_2129	nickel-dependent hydrogenase large subunit	1755	26.9	33.4	0.31	31	0.6002	1		Amuc_1967	Thioredoxin domain	507	17.4	15	-0.22	2	0.54029	1
Amuc_1982	hypothetical protein	702	2257.5	2794.3	0.31	31	0.60033	1		Amuc_0364	hypothetical protein	1578	17.3	30.3	0.81	0	0.54029	1
Amuc_1036	GTP-binding protein LepA	1797	4260.3	5168	0.28	44	0.60047	1		Amuc_1563	protein of unknown function DUF6 transmembrane	915	17.3	18.1	0.07	1	0.54029	1
Amuc_0735	YD repeat protein	5814	354.3	278.5	-0.35	44	0.60047	1		Amuc_2029	efflux transporter, RND family, MFP subunit	1134	17.2	2.4	-2.87	2	0.54029	1
Amuc_0461	PDZ/DHR/GLGF domain protein	873	5170.4	2517.5	-1.04	167	0.60629	1		Amuc_2100	aminoglycoside phosphotransferase	1146	17.2	26.3	0.61	0	0.54029	1
Amuc_0824	glycoside hydrolase family 2 TIM barrel	3792	910.2	876.5	-0.05	2784	0.6145	1		Amuc_0196	serine/threonine protein kinase	1641	17	17.2	0.02	1	0.54029	1
Amuc_0126	hypothetical protein	2307	186.9	194.1	0.05	108	0.61671	1		Amuc_1088--Amuc_1089	intergenic	73	16.9	16.3	-0.05	1	0.54029	1
Amuc_1891	hypothetical protein	885	9109.7	13994.6	0.62	4	0.61708	1		Amuc_1344	hypothetical protein	516	16.9	8.6	-0.97	2	0.54029	1
Amuc_0863	glycosyl hydrolase family 88	2232	1268.5	1127.5	-0.17	8	0.61708	1		Amuc_1751	glycoside hydrolase family 13 domain protein	2034	16.4	3.3	-2.3	2	0.54029	1
Amuc_1174	hypothetical protein	681	941.1	794.3	-0.24	8	0.61708	1		Amuc_1667	glycoside hydrolase family 2 sugar binding	2574	16.1	15	-0.11	2	0.54029	1
Amuc_0983--Amuc_0984	intergenic	554	283.8	188.5	-0.59	8	0.61708	1		Amuc_0051	single-stranded-DNA-specific exonuclease RecJ	1737	16	9.6	-0.74	2	0.54029	1
Amuc_0146--Amuc_0147	intergenic	334	200.5	144.8	-0.47	8	0.61708	1		Amuc_0539--Amuc_0540	intergenic	267	15.8	1.9	-3.04	2	0.54029	1
Amuc_1409--Amuc_1410	intergenic	168	148.5	137.6	-0.11	8	0.61708	1		Amuc_1432	putative lipoprotein	429	15.7	12.9	-0.28	1	0.54029	1
Amuc_1378	integrase family protein	1248	81.6	62.5	-0.38	8	0.61708	1		Amuc_0437	ribosomal protein S4	609	15.4	3.7	-2.04	2	0.54029	1
Amuc_0097	ROK family protein	957	44.2	33	-0.42	8	0.61708	1		Amuc_1969	hypothetical protein	1413	15.4	0.5	-4.94	2	0.54029	1
Amuc_0485--Amuc_0486	intergenic	152	39.1	30.2	-0.37	8	0.61708	1		Amuc_0468	transcriptional regulator, DeoR family	747	15.3	3.9	-1.99	2	0.54029	1
Amuc_1039	outer membrane autotransporter barrel domain protein	5595	1891.8	2860	0.6	269	0.64294	1		Amuc_0858	cyclic nucleotide-binding protein	1440	15.2	37	1.28	0	0.54029	1
Amuc_1426	hypothetical protein	831	13909.2	11088.7	-0.33	43	0.66252	1		Amuc_0978	D-tyrosyl-tRNA(Tyr) deacylase	450	15.1	12	-0.32	2	0.54029	1
Amuc_1794	peptidase S24 and S26 domain protein	804	877	543.1	-0.69	43	0.66252	1		Amuc_0174	hypothetical protein	855	15	0.5	-4.9	2	0.54029	1
Amuc_1951	NADH:flavin oxidoreductase/NADH oxidase	1101	110.3	132.4	0.26	47	0.66477	1		Amuc_0524	hypothetical protein	783	15	2	-2.91	2	0.54029	1
Amuc_0977	hypothetical protein	726	305.1	119.7	-1.35	28	0.67125	1		Amuc_1692	2-oxoglutarate dehydrogenase, E2 subunit, dihydrolipoamide succinyltransferase	1089	15	13.5	-0.16	2	0.54029	1
Amuc_0513	hypothetical protein	2199	3773.4	9911.4	1.39	814	0.67534	1		Amuc_0757	glycosyl transferase family 2	1152	14.6	5.4	-1.44	2	0.54029	1
Amuc_1722	outer membrane autotransporter barrel domain protein	5526	127.9	77.5	-0.72	133	0.68776	1		Amuc_0220	transporter, hydrophobe/amphiphile efflux-1 (HAE1) family	3168	14.5	15.2	0.07	1	0.54029	1
Amuc_0356	hypothetical protein	480	7107.2	7916.5	0.16	137	0.69622	1		Amuc_1700	tryptophan synthase, beta subunit	1221	14.4	10.6	-0.44	2	0.54029	1
Amuc_0711	sodium/hydrogen exchanger	1743	2211.3	3022.2	0.45	11	0.71153	1		Amuc_1205--Amuc_1206	intergenic	242	14.3	5.4	-1.42	2	0.54029	1
Amuc_0175	PDZ/DHR/GLGF domain protein	1170	422.4	196.6	-1.1	16	0.71153	1		Amuc_1686--Amuc_1687	intergenic	255	14.2	12.9	-0.14	1	0.54029	1
Amuc_0236	Ion transport 2 domain protein	768	244.8	254	0.05	16	0.71153	1		Amuc_1903	conserved hypothetical protein	1005	14.2	1.4	-3.31	2	0.54029	1
Amuc_1026	Peptidylprolyl isomerase	501	231.7	307.9	0.41	11	0.71153	1		Amuc_1816	conserved hypothetical protein	948	14.1	9	-0.66	2	0.54029	1
Amuc_1569	hypothetical protein	519	92.2	105.9	0.2	11	0.71153	1		Amuc_0207	hypothetical protein	699	14	16	0.19	1	0.54029	1
Amuc_1226	hypothetical protein	1038	78.6	50.3	-0.64	16	0.71153	1		Amuc_0252	hypothetical protein	843	14	8.2	-0.77	2	0.54029	1
Amuc_1522	type III restriction protein res subunit	3024	47.4	51.2	0.11	11	0.71153	1		Amuc_0366	transcriptional regulator, NifA subfamily, Fis Family	1524	14	12	-0.22	2	0.54029	1
Amuc_1473	hypothetical protein	1224	33.6	44.8	0.41	11	0.71153	1		Amuc_0694	hypothetical protein	1182	14	13.5	-0.06	2	0.54029	1
Amuc_0722	GTP-binding protein TypA	1833	430.4	411.1	-0.07	60	0.71381	1		Amuc_1588	hypothetical protein	507	14	13.6	-0.05	1	0.54029	1
Amuc_2057	hypothetical protein	501	874.1	788.6	-0.15	60	0.71387	1		Amuc_0808	ATP-dependent helicase HrpA	3693	13.9	17.2	0.31	0	0.54029	1
Amuc_1687	hypothetical protein	666	1551.5	3095.7	1	111	0.71485	1		Amuc_1650--Amuc_1651	intergenic	711	13.7	13.8	0.01	1	0.54029	1
Amuc_1316	transcriptional regulator, MarR family	459	3820.8	5548.9	0.54	111	0.71486	1		Amuc_0767	conserved hypothetical protein	483	13.5	10.2	-0.41	2	0.54029	1
Amuc_0537	peptidase M42 family protein	1077	419.8	462.4	0.14	195	0.72457	1		Amuc_1912--Amuc_1913	intergenic	372	13.5	22.5	0.74	1	0.54029	1
Amuc_1661--Amuc_1662	intergenic	336	9524.8	13897	0.55	33	0.72698	1		Amuc_1336	peptidase S49	741	13.4	7.7	-0.8	2	0.54029	1
Amuc_2002	heat shock protein Hsp90	1839	3936	6930.5	0.82	33	0.72698	1		Amuc_1254	60 kDa inner membrane insertion protein	1884	13.1	1.4	-3.2	2	0.54029	1
Amuc_0347	iojap-like protein	348	1895.3	3553	0.91	33	0.72698	1		Amuc_1827	Pirin domain protein	696	12.9	14.9	0.21	0	0.54029	1
Amuc_0789	hypothetical protein	651	10347.8	12092.8	0.22	824	0.73821	1		Amuc_0624	regulatory protein GntR HTH	1185	12.7	13.3	0.06	1	0.54029	1
Amuc_1704	hypothetical protein	1641	1158.8	1123.7	-0.04	104	0.74413	1		Amuc_1593--Amuc_1594	intergenic	94	12.6	1	-3.65	2	0.54029	1
Amuc_1665	conserved hypothetical protein	939	5360.2	5585.5	0.06	169	0.74499	1		Amuc_0697	beta-glucanase precursor	1143	12.5	2.4	-2.39	2	0.54029	1
Amuc_0372	glutamate decarboxylase	1398	214.7	217.9	0.02	230	0.74787	1		Amuc_1666	glycoside hydrolase family 2 TIM barrel	3867	12.4	4.8	-1.38	2	0.54029	1
Amuc_1978	hypothetical protein	762	440	587.9	0.42	80	0.75023	1		Amuc_0050	pseduogene	847	12.2	6.9	-0.83	2	0.54029	1
Amuc_1083	heavy metal translocating P-type ATPase	2094	612.7	429.7	-0.51	27	0.76159	1		Amuc_1089	FeoA family protein	228	12.2	7.2	-0.75	2	0.54029	1
Amuc_0584	outer membrane autotransporter barrel domain protein	6906	134.5	146.8	0.13	27	0.76159	1		Amuc_1654--Amuc_1655	intergenic	187	12.1	4.9	-1.32	2	0.54029	1
Amuc_0384	Maltose O-acetyltransferase	639	2669.1	4293.7	0.69	21	0.76176	1		Amuc_1054	hypothetical protein	747	11.9	1	-3.57	2	0.54029	1
Amuc_0044	Diaminopimelate epimerase	822	2100	4549.8	1.12	21	0.76176	1		Amuc_2131	hydrogenase maturation protease	543	11.9	16.4	0.47	0	0.54029	1
Amuc_0871	large conductance mechanosensitive channel protein	411	543.2	1227.2	1.18	27	0.76176	1		Amuc_0812	glucose inhibited division protein A	1884	11.8	1.9	-2.61	2	0.54029	1
Amuc_1860	Formate--tetrahydrofolate ligase	1671	86.5	118.4	0.45	21	0.76176	1		Amuc_1209--Amuc_1210	intergenic	279	11.8	6.3	-0.91	2	0.54029	1
Amuc_1180	GntR domain protein	693	638.5	676.6	0.08	49	0.76418	1		Amuc_1772	Abortive infection protein	777	11.7	1	-3.55	2	0.54029	1
Amuc_1661	hypothetical protein	645	81.1	113.7	0.49	140	0.76666	1		Amuc_2055	conserved hypothetical protein	342	11.7	12.9	0.14	1	0.54029	1
Amuc_1560	hypothetical protein	786	715.2	749.4	0.07	130	0.77006	1		Amuc_0208	glucose-1-phosphate thymidylyltransferase	861	11.6	2	-2.54	2	0.54029	1
Amuc_0525	cycloartenol synthase-like protein	1176	528.4	553.4	0.07	130	0.77006	1		Amuc_0496	hypothetical protein	1794	11.4	10	-0.2	1	0.54029	1
Amuc_1266	hypothetical protein	660	127968	227079	0.83	34	0.79343	1		Amuc_0909	protein of unknown function UPF0027	1113	11.1	17.8	0.68	0	0.54029	1
Amuc_0452	DEAD/DEAH box helicase domain protein	1812	331.1	334.8	0.02	41	0.79343	1		Amuc_1414	polysaccharide export protein	603	451.6	895.2	0.99	12	0.55221	1
Amuc_1936	hypothetical protein	429	99.2	93.6	-0.08	41	0.79343	1		Amuc_0938	Polyphosphate kinase	2085	394.2	302.4	-0.38	20	0.55221	1
Amuc_1008	glycoside hydrolase family 31	3933	131.9	156.8	0.25	280	0.79838	1		Amuc_0730	conserved hypothetical protein	1023	321.2	288.3	-0.16	20	0.55221	1
Amuc_1069	adenosylhomocysteinase	1413	3996	4389.8	0.14	102	0.81083	1		Amuc_0229	hypothetical protein	495	307.9	288.1	-0.1	20	0.55221	1
Amuc_1333	hypothetical protein	843	20126.5	33919.5	0.75	324	0.82437	1		Amuc_0356	hypothetical protein	480	7583.9	9358.7	0.3	86	0.55257	1
Amuc_0448	glycine dehydrogenase	2844	617.7	937.8	0.6	469	0.8301	1		Amuc_0581	diaminopimelate dehydrogenase	879	3193.6	5016	0.65	86	0.55257	1
Amuc_0894	peptidase membrane zinc metallopeptidase putative	756	309.2	524.4	0.76	69	0.83193	1		Amuc_0435	hypothetical protein	882	3753.8	4137.9	0.14	162	0.55703	1
Amuc_0834	transcriptional regulator, MarR family with acetyltransferase activity	954	6278.4	9890.3	0.66	581	0.83714	1		Amuc_1069	adenosylhomocysteinase	1413	4262.6	3838.5	-0.15	74	0.56073	1
Amuc_1660	pseduogene	6079	3489.9	4282.1	0.3	1406	0.83994	1		Amuc_2070	Catalase	2253	133.8	103.1	-0.38	30	0.5812	1
Amuc_1074	sulfatase	1656	3142.2	4997.5	0.67	502	0.84025	1		Amuc_0347	iojap-like protein	348	2020.7	3383.1	0.74	20	0.58154	1
Amuc_0242	pseudouridine synthase	1401	199.1	196	-0.02	101	0.84474	1		Amuc_0052	Hyalurononglucosaminidase	2859	1151.4	790.7	-0.54	30	0.58154	1
Amuc_1209	hypothetical protein	747	37299.1	48665.7	0.38	15	0.85331	1		Amuc_1500	polysaccharide deacetylase	960	661.9	812	0.29	92	0.5891	1
Amuc_2170--Amuc_2171	intergenic	423	6663.3	12676	0.93	12	0.85331	1		Amuc_1974	pyruvate, phosphate dikinase	2742	1250.6	804.8	-0.64	187	0.60211	1
Amuc_0275	preprotein translocase, YajC subunit	330	2902.5	2026.6	-0.52	15	0.85331	1		Amuc_1091	Cytochrome-c peroxidase	1377	773.5	681.6	-0.18	73	0.6027	1
Amuc_0154	hypothetical protein	603	2490	2645.8	0.09	15	0.85331	1		Amuc_1258	glutamine synthetase catalytic region	2109	753.6	969.3	0.36	42	0.60647	1
Amuc_1310--Amuc_1311	intergenic	142	1826.3	1570	-0.22	15	0.85331	1		Amuc_0999	sigma 54 modulation protein/ribosomal protein S30EA	591	266.9	237.1	-0.17	72	0.64603	1
Amuc_1703	Ferroxidase	492	1422	2355.6	0.73	12	0.85331	1		Amuc_1687	hypothetical protein	666	1656.7	2703.7	0.71	72	0.66197	1
Amuc_0341	hypothetical protein	459	1258.8	2137	0.76	12	0.85331	1		Amuc_0952	hypothetical protein	756	6996.6	9576.9	0.45	154	0.66575	1
Amuc_1702--Amuc_1703	intergenic	114	575.7	545.4	-0.08	15	0.85331	1		Amuc_0821	Peptidoglycan-binding LysM	492	4299.5	5878.3	0.45	29	0.66817	1
Amuc_0237	arsenate reductase and related	357	407.9	471.5	0.21	12	0.85331	1		Amuc_0355	hypothetical protein	513	1113.8	1203.3	0.11	29	0.66817	1
Amuc_0917	peptidase U32	2505	198	143.1	-0.47	15	0.85331	1		Amuc_0833	Cupin 2 conserved barrel domain protein	351	747.3	1059.2	0.5	21	0.66817	1
Amuc_0242--Amuc_0243	intergenic	200	130.8	145.3	0.15	12	0.85331	1		Amuc_0452	DEAD/DEAH box helicase domain protein	1812	353.9	321.7	-0.14	29	0.66817	1
Amuc_1481	6-phosphofructokinase	1077	94.6	98.2	0.05	15	0.85331	1		Amuc_1182	sulfatase	1395	13449.8	2117.4	-2.67	19	0.67113	1
Amuc_2153	hypothetical protein	798	78.7	102.4	0.38	12	0.85331	1		Amuc_1616	polysaccharide deacetylase	1464	148.7	112.5	-0.4	19	0.67113	1
Amuc_1498	protein of unknown function DUF152	687	56.9	91.1	0.68	12	0.85331	1		Amuc_2176	excinuclease ABC, A subunit	5520	84.5	67.8	-0.32	19	0.67113	1
Amuc_1037	conserved hypothetical protein	201	45.4	110.6	1.29	15	0.85331	1		Amuc_0976	hypothetical protein	567	66	51.7	-0.35	19	0.67113	1
Amuc_0335	ABC transporter related	744	3962.4	5939.2	0.58	22	0.85566	1		Amuc_0456	DoxX family protein	459	33.6	27.4	-0.3	19	0.67113	1
Amuc_1915	type I restriction-modification system, M subunit	2559	2717.5	3829.4	0.49	22	0.85566	1		Amuc_0336	TonB-dependent receptor	2220	1236.6	1489.3	0.27	663	0.67341	1
Amuc_1890	Undecaprenyl-diphosphatase	834	751.4	806	0.1	22	0.85566	1		Amuc_0967	RNP-1 like RNA-binding protein	663	47226.7	40770.6	-0.21	41	0.67342	1
Amuc_0730	conserved hypothetical protein	1023	301.5	293	-0.04	26	0.85566	1		Amuc_1039	outer membrane autotransporter barrel domain protein	5595	2017.5	2601.4	0.37	180	0.67918	1
Amuc_1399	(NiFe) hydrogenase maturation protein HypF	2325	182.4	153.7	-0.25	26	0.85566	1		Amuc_1978	hypothetical protein	762	468.7	614.4	0.39	55	0.68157	1
Amuc_1633	Helicase ATP-dependent domain protein	2583	389	451.1	0.21	6	0.86684	1		Amuc_1705	Endoribonuclease L-PSP	468	1137.4	939.3	-0.28	11	0.69854	1
Amuc_0555	protein of unknown function DUF21	1329	62.6	59	-0.08	7	0.86684	1		Amuc_1411--Amuc_1412	intergenic	22	807.4	1453.2	0.85	7	0.69854	1
Amuc_0552	Indole-3-glycerol-phosphate synthase	783	24.6	21.4	-0.2	7	0.86684	1		Amuc_0175	PDZ/DHR/GLGF domain protein	1170	450.2	403.2	-0.16	11	0.69854	1
Amuc_0016--Amuc_0017	intergenic	492	11.5	7.8	-0.56	6	0.86684	1		Amuc_0064	5-oxopent-3-ene-1,2,5-tricarboxylatedecarboxylase	876	421.4	426.7	0.02	11	0.69854	1
Amuc_0840	sulfate transporter	1677	119964	18763.7	-2.68	6	0.86763	1		Amuc_0891	hypothetical protein	600	266.2	383.9	0.53	7	0.69854	1
Amuc_2141	hypothetical protein	486	60705.5	84670.5	0.48	6	0.86763	1		Amuc_1253	Glutamate synthase (ferredoxin)	4437	207.2	184.1	-0.17	11	0.69854	1
Amuc_1227	conserved hypothetical protein	312	11221.5	7083.8	-0.66	7	0.86763	1		Amuc_1268	L-serine dehydratase 1	1377	166	134.4	-0.3	11	0.69854	1
Amuc_0739	transferase hexapeptide repeat containing protein	600	10281	297.5	-5.11	7	0.86763	1		Amuc_1126	dimethyladenosine transferase	1377	102.2	65.6	-0.64	11	0.69854	1
Amuc_R0059--Amuc_2018	intergenic	149	10102.6	13875.8	0.46	6	0.86763	1		Amuc_0121	sulfatase	1578	101.3	89.4	-0.18	11	0.69854	1
Amuc_0434--Amuc_0435	intergenic	139	9835.2	13227.5	0.43	6	0.86763	1		Amuc_1624	protein of unknown function DUF107	1434	78.3	65.7	-0.25	11	0.69854	1
Amuc_0469	GCN5-related N-acetyltransferase	441	6361.8	11760.9	0.89	6	0.86763	1		Amuc_1033	sulfatase	1743	74.2	78.5	0.08	11	0.69854	1
Amuc_0684	transcriptional regulator, HxlR family	363	4024.7	10874.8	1.43	51	0.86763	1		Amuc_1522	type III restriction protein res subunit	3024	50.8	47.6	-0.09	11	0.69854	1
Amuc_1057--Amuc_1058	intergenic	89	3733.4	3991.9	0.1	7	0.86763	1		Amuc_0448	glycine dehydrogenase	2844	658.6	894	0.44	303	0.70679	1
Amuc_1549	Cof-like hydrolase	837	3277.2	4068.8	0.31	6	0.86763	1		Amuc_0360	hypothetical protein	552	6072.1	5620.6	-0.11	109	0.70844	1
Amuc_1502	pseduogene	1040	3245.3	3302.5	0.03	7	0.86763	1		Amuc_1661	hypothetical protein	645	86.4	116.3	0.43	91	0.70844	1
Amuc_1799	uncharacterized Fe-S center protein, putative ferredoxin	1005	2012.2	59.1	-5.09	6	0.86763	1		Amuc_0537	peptidase M42 family protein	1077	447.9	454	0.02	131	0.71675	1
Amuc_0803	coagulation factor 5/8 type domain protein	2136	1709.8	3061.7	0.84	6	0.86763	1		Amuc_0789	hypothetical protein	651	11045.9	12873.4	0.22	547	0.73352	1
Amuc_2016	Hydroxyethylthiazole kinase	813	1322.3	1324.4	0	7	0.86763	1		Amuc_1660	pseduogene	6079	3725.3	4227.2	0.18	919	0.7352	1
Amuc_1845	pseduogene	2351	1294.8	1654.1	0.35	6	0.86763	1		Amuc_1704	hypothetical protein	1641	1235.3	1004.2	-0.3	70	0.73626	1
Amuc_0060--Amuc_0061	intergenic	1021	1216.6	388	-1.65	6	0.86763	1		Amuc_1316	transcriptional regulator, MarR family	459	4077.7	4809.5	0.24	74	0.73814	1
Amuc_1623	MiaB-like tRNA modifying enzyme YliG	1356	1138.5	90.4	-3.66	7	0.86763	1		Amuc_1560	hypothetical protein	786	763	785.9	0.04	88	0.73814	1
Amuc_1841	Thioredoxin domain	942	899.1	899.1	0	7	0.86763	1		Amuc_2106	Malate dehydrogenase (oxaloacetate-decarboxylating) (NADP(+))	1308	218.3	227.9	0.06	74	0.73814	1
Amuc_0277	tRNA (guanine-N(7)-)-methyltransferase	594	843.9	1400.7	0.73	6	0.86763	1		Amuc_2072	Rubrerythrin	573	5191.6	4145.9	-0.32	40	0.74306	1
Amuc_1911	iron-containing alcohol dehydrogenase	1158	806.9	757.5	-0.09	5	0.86763	1		Amuc_1180	GntR domain protein	693	681.6	701.7	0.04	32	0.74306	1
Amuc_0328	hypothetical protein	2013	735.9	740.5	0.01	5	0.86763	1		Amuc_1665	conserved hypothetical protein	939	5720.3	5533.7	-0.05	112	0.74548	1
Amuc_1602	hypothetical protein	150	562.9	18.6	-4.92	6	0.86763	1		Amuc_1266	hypothetical protein	660	136555	220796	0.69	22	0.75946	1
Amuc_0154--Amuc_0155	intergenic	37	533	834.3	0.65	6	0.86763	1		Amuc_1426	hypothetical protein	831	14838.7	10744.8	-0.47	28	0.75946	1
Amuc_0572	hypothetical protein	327	444.5	612.6	0.46	6	0.86763	1		Amuc_2002	heat shock protein Hsp90	1839	4205.1	5650.6	0.43	22	0.75946	1
Amuc_1634--Amuc_1635	intergenic	500	409.5	444	0.12	6	0.86763	1		Amuc_1982	hypothetical protein	702	2411	2726.6	0.18	22	0.75946	1
Amuc_1764	protein of unknown function DUF179	561	402.9	464.2	0.2	6	0.86763	1		Amuc_1794	peptidase S24 and S26 domain protein	804	936	725.6	-0.37	28	0.75946	1
Amuc_0945	glycosyl transferase family 2	1074	394.5	508.2	0.37	5	0.86763	1		Amuc_0790	O-acetylhomoserine/O-acetylserine sulfhydrylase	1299	183.2	222.4	0.28	22	0.75946	1
Amuc_0714	protein of unknown function DUF1432	1047	388.3	334	-0.22	7	0.86763	1		Amuc_1936	hypothetical protein	429	106.1	102.9	-0.04	28	0.75946	1
Amuc_1312	peptidase M16 domain protein	2520	376.1	464.3	0.3	6	0.86763	1		Amuc_2129	nickel-dependent hydrogenase large subunit	1755	29	29.4	0.02	28	0.75946	1
Amuc_0270--Amuc_0271	intergenic	161	329.9	414.2	0.33	6	0.86763	1		Amuc_0513	hypothetical protein	2199	4025	7533.2	0.9	553	0.7881	1
Amuc_0342	OsmC family protein	405	305.7	400.6	0.39	5	0.86763	1		Amuc_0235	alpha-glucan phosphorylase	1662	11874.3	16777	0.5	756	0.79063	1
Amuc_0265--Amuc_0266	intergenic	145	299.7	421.8	0.49	6	0.86763	1		Amuc_1656	hypothetical protein	789	1619.7	1991.3	0.3	45	0.794	1
Amuc_1471--Amuc_1472	intergenic	130	288.6	382.4	0.41	6	0.86763	1		Amuc_0147	Thioredoxin domain	963	1147.4	1102	-0.06	53	0.794	1
Amuc_1824	hypothetical protein	564	286.7	161	-0.83	6	0.86763	1		Amuc_0894	peptidase membrane zinc metallopeptidase putative	756	330.3	478.4	0.53	45	0.794	1
Amuc_2136	Glycoside hydrolase, family 20, catalytic core	2268	267.7	371.9	0.47	51	0.86763	1		Amuc_1915	type I restriction-modification system, M subunit	2559	2899	3509.8	0.28	14	0.79891	1
Amuc_2169--Amuc_2170	intergenic	162	250.1	353.1	0.5	6	0.86763	1		Amuc_0384	Maltose O-acetyltransferase	639	2848.3	3844.1	0.43	14	0.79891	1
Amuc_1187	Alpha-galactosidase	1599	243.4	354.5	0.54	6	0.86763	1		Amuc_0611	Phosphoribosyl-AMP cyclohydrolase	489	2631.7	1966.1	-0.42	18	0.79891	1
Amuc_0428--Amuc_0429	intergenic	149	230.9	176.7	-0.39	5	0.86763	1		Amuc_0044	Diaminopimelate epimerase	822	2240.2	4339.9	0.95	14	0.79891	1
Amuc_1364	hypothetical protein	567	228.6	189	-0.27	6	0.86763	1		Amuc_1890	Undecaprenyl-diphosphatase	834	803.8	884.5	0.14	14	0.79891	1
Amuc_0381	protein of unknown function DUF21	1332	225.1	209.2	-0.11	7	0.86763	1		Amuc_1083	heavy metal translocating P-type ATPase	2094	655	446.5	-0.55	18	0.79891	1
Amuc_1995	Tryptophanase	1461	219.6	250.8	0.19	5	0.86763	1		Amuc_0871	large conductance mechanosensitive channel protein	411	580.8	1187.1	1.03	18	0.79891	1
Amuc_0451	sulfatase	2157	208.8	282.7	0.44	6	0.86763	1		Amuc_0625	Exo-alpha-sialidase	1257	220.5	193.5	-0.19	18	0.79891	1
Amuc_2164	glycoside hydrolase family 18	3699	202.2	666.8	1.72	6	0.86763	1		Amuc_1399	(NiFe) hydrogenase maturation protein HypF	2325	194	132	-0.56	18	0.79891	1
Amuc_1973--Amuc_1974	intergenic	450	195.3	239.4	0.29	6	0.86763	1		Amuc_0584	outer membrane autotransporter barrel domain protein	6906	142.5	148.8	0.06	14	0.79891	1
Amuc_1974--Amuc_1975	intergenic	368	185.5	156	-0.25	6	0.86763	1		Amuc_0036	YD repeat protein	5871	66.5	119.9	0.85	39	0.81478	1
Amuc_0325	conserved hypothetical protein	1293	178.7	183.4	0.04	7	0.86763	1		Amuc_0684	transcriptional regulator, HxlR family	363	4295.5	10102.7	1.23	33	0.81487	1
Amuc_0799--Amuc_0800	intergenic	237	171.7	199	0.21	6	0.86763	1		Amuc_2134	conserved hypothetical protein	399	3834.3	5709.3	0.57	33	0.81487	1
Amuc_0815--Amuc_0816	intergenic	492	153	151.9	-0.01	6	0.86763	1		Amuc_0840	sulfate transporter	1677	128029	44272.1	-1.53	4	0.81696	1
Amuc_1316--Amuc_1317	intergenic	747	146.3	168.5	0.2	5	0.86763	1		Amuc_2141	hypothetical protein	486	64782	88893.5	0.46	4	0.81696	1
Amuc_0327	hypothetical protein	585	101.5	129.2	0.35	6	0.86763	1		Amuc_1227	conserved hypothetical protein	312	11972.4	11683.2	-0.04	3	0.81696	1
Amuc_1588--Amuc_1589	intergenic	155	101	111.3	0.14	7	0.86763	1		Amuc_0739	transferase hexapeptide repeat containing protein	600	10973.8	1493	-2.88	5	0.81696	1
Amuc_1065	hypothetical protein	642	83.9	76.6	-0.13	6	0.86763	1		Amuc_R0059--Amuc_2018	intergenic	149	10776.4	12744.2	0.24	4	0.81696	1
Amuc_1216	oxidoreductase domain protein	1275	81.8	92.7	0.18	6	0.86763	1		Amuc_0434--Amuc_0435	intergenic	139	10497.3	12300.7	0.23	4	0.81696	1
Amuc_1200	cobalamin (vitamin B12) biosynthesis CbiM protein	1041	76	110.7	0.54	6	0.86763	1		Amuc_1105	hypothetical protein	657	7830.1	9157.1	0.23	4	0.81696	1
Amuc_2020	LAO/AO transport system ATPase	1017	73.4	60.2	-0.29	7	0.86763	1		Amuc_0469	GCN5-related N-acetyltransferase	441	6789.9	10294.1	0.6	4	0.81696	1
Amuc_1128	conserved hypothetical protein	261	71.6	59.2	-0.27	7	0.86763	1		Amuc_1549	Cof-like hydrolase	837	3492.8	3471.9	-0.01	5	0.81696	1
Amuc_1723	outer membrane autotransporter barrel domain protein	5859	59.6	51.4	-0.21	6	0.86763	1		Amuc_1502	pseduogene	1040	3457.3	3883.2	0.17	4	0.81696	1
Amuc_0504	hypothetical protein	561	55.2	50.6	-0.13	7	0.86763	1		Amuc_1799	uncharacterized Fe-S center protein, putative ferredoxin	1005	2145.1	83.9	-4.68	4	0.81696	1
Amuc_0688	hypothetical protein	738	53.3	40.3	-0.4	7	0.86763	1		Amuc_0803	coagulation factor 5/8 type domain protein	2136	1819.1	2408.1	0.4	4	0.81696	1
Amuc_1293--Amuc_1294	intergenic	229	52.8	100.6	0.93	6	0.86763	1		Amuc_1187--Amuc_1188	intergenic	335	1668.1	1434	-0.22	4	0.81696	1
Amuc_1222	oligopeptide transporter, OPT superfamily	1866	48.9	35.1	-0.48	7	0.86763	1		Amuc_2016	Hydroxyethylthiazole kinase	813	1409.8	1981.1	0.49	4	0.81696	1
Amuc_0017	oxidoreductase domain protein	1443	37.9	44	0.21	6	0.86763	1		Amuc_1845	pseduogene	2351	1380.1	1606.9	0.22	4	0.81696	1
Amuc_1149--Amuc_1150	intergenic	1063	35.9	29.1	-0.3	6	0.86763	1		Amuc_0060--Amuc_0061	intergenic	1021	1300.2	525.7	-1.31	4	0.81696	1
Amuc_0883	hypothetical protein	186	33.1	35.4	0.1	6	0.86763	1		Amuc_1623	MiaB-like tRNA modifying enzyme YliG	1356	1216.1	150.8	-3.01	5	0.81696	1
Amuc_1108--Amuc_1109	intergenic	579	21.8	24.7	0.19	5	0.86763	1		Amuc_1174	hypothetical protein	681	1004.1	795.8	-0.34	5	0.81696	1
Amuc_1797	conserved hypothetical protein	870	21.6	24.3	0.17	6	0.86763	1		Amuc_0536	hypothetical protein	777	999.4	565.1	-0.82	4	0.81696	1
Amuc_1252	glutamine synthetase catalytic region	2133	15.6	14.2	-0.13	6	0.86763	1		Amuc_0277	tRNA (guanine-N(7)-)-methyltransferase	594	900.8	1144.5	0.35	4	0.81696	1
Amuc_1656	hypothetical protein	789	1519.1	2280	0.59	70	0.87354	1		Amuc_1602	hypothetical protein	150	602.6	30.9	-4.29	4	0.81696	1
Amuc_1409	conserved hypothetical protein	450	816.5	1080.9	0.4	70	0.87354	1		Amuc_0154--Amuc_0155	intergenic	37	568.6	727.2	0.36	4	0.81696	1
Amuc_1543	formate acetyltransferase	2265	1203.8	1589.2	0.4	611	0.90712	1		Amuc_1173	conserved hypothetical protein	996	540.7	776.8	0.52	4	0.81696	1
Amuc_0147	Thioredoxin domain	963	1075.2	1118.5	0.06	76	0.91549	1		Amuc_1059--Amuc_1060	intergenic	87	523.9	372.6	-0.49	5	0.81696	1
Amuc_2134	conserved hypothetical protein	399	3593.3	6311.1	0.81	52	0.92034	1		Amuc_0572	hypothetical protein	327	471.2	595.3	0.34	4	0.81696	1
Amuc_0446	glycine cleavage system T protein	1083	3120.6	2658.1	-0.23	52	0.92034	1		Amuc_1634--Amuc_1635	intergenic	500	435.9	411.8	-0.08	5	0.81696	1
Amuc_0066	putative ATP/GTP-binding protein	912	4110.5	7524.3	0.87	39	0.93018	1		Amuc_1764	protein of unknown function DUF179	561	429.5	547.4	0.35	4	0.81696	1
Amuc_1028	hypothetical protein	648	60890.2	89154.2	0.55	36	0.93044	1		Amuc_0945	glycosyl transferase family 2	1074	421.6	402.1	-0.07	4	0.81696	1
Amuc_1484	hypothetical protein	1017	387.5	437.4	0.17	36	0.93044	1		Amuc_0714	protein of unknown function DUF1432	1047	416.4	421.7	0.02	3	0.81696	1
Amuc_0790	O-acetylhomoserine/O-acetylserine sulfhydrylase	1299	171.1	200	0.23	36	0.93044	1		Amuc_1633	Helicase ATP-dependent domain protein	2583	414.5	630.4	0.61	4	0.81696	1
Amuc_1521	DNA methylase N-4/N-6 domain protein	1896	74.8	72.3	-0.05	36	0.93044	1		Amuc_1312	peptidase M16 domain protein	2520	400.5	448.6	0.16	4	0.81696	1
Amuc_0815	hypothetical protein	681	1049.6	777.2	-0.43	250	0.94945	1		Amuc_0270--Amuc_0271	intergenic	161	352.1	415	0.24	4	0.81696	1
Amuc_1398	hydrogenase accessory protein HypB	738	566.9	579.8	0.03	23	0.95165	1		Amuc_0342	OsmC family protein	405	327.5	348.5	0.09	4	0.81696	1
Amuc_0597	conserved hypothetical protein	504	515.1	192.9	-1.42	24	0.95165	1		Amuc_0265--Amuc_0266	intergenic	145	320.8	437.7	0.45	4	0.81696	1
Amuc_0625	Exo-alpha-sialidase	1257	205.6	169.7	-0.28	24	0.95165	1		Amuc_1471--Amuc_1472	intergenic	130	307.5	392.6	0.35	3	0.81696	1
Amuc_1123	hypothetical protein	1500	1394.1	2607.5	0.9	72	0.95769	1		Amuc_1824	hypothetical protein	564	304.6	249.9	-0.29	4	0.81696	1
Amuc_0895	conserved hypothetical protein	456	582.7	1075.9	0.88	55	0.9734	1		Amuc_2169--Amuc_2170	intergenic	162	266.7	268.9	0.01	4	0.81696	1
Amuc_0967	RNP-1 like RNA-binding protein	663	44268.1	52080.2	0.23	55	0.97341	1		Amuc_1187	Alpha-galactosidase	1599	259.6	394	0.6	4	0.81696	1
Amuc_1179	ABC transporter related	795	15782.5	15617.1	-0.02	53	0.97341	1		Amuc_0428--Amuc_0429	intergenic	149	245.7	226.4	-0.12	3	0.81696	1
Amuc_0794	hypothetical protein	432	11551.1	12120.5	0.07	54	0.97341	1		Amuc_1364	hypothetical protein	567	241.1	175.7	-0.46	4	0.81696	1
Amuc_1622	hypothetical protein	606	607.9	850.8	0.48	54	0.97341	1		Amuc_0381	protein of unknown function DUF21	1332	240.9	247.4	0.04	4	0.81696	1
Amuc_1184	Phosphopyruvate hydratase	1278	204.8	170.1	-0.27	53	0.97341	1		Amuc_1995	Tryptophanase	1461	233	246.8	0.08	3	0.81696	1
Amuc_0036	YD repeat protein	5871	62.2	149.4	1.27	55	0.97341	1		Amuc_0451	sulfatase	2157	222.4	253.9	0.19	4	0.81696	1
Amuc_1185	aminotransferase class I and II	1593	121.4	137.6	0.18	96	0.98264	1		Amuc_2164	glycoside hydrolase family 18	3699	214.7	564.9	1.4	4	0.81696	1
Amuc_0428	hypothetical protein	825	1129.1	1793.7	0.67	216	0.9905	1		Amuc_0146--Amuc_0147	intergenic	334	214.6	166.9	-0.36	4	0.81696	1
Amuc_0460	hypothetical protein	519	173284	179930	0.05	1	1	1		Amuc_1973--Amuc_1974	intergenic	450	207.9	274.7	0.4	4	0.81696	1
Amuc_1057	hypothetical protein	270	8089.9	7644.3	-0.08	13	1	1		Amuc_1300	adenylylsulfate reductase, thioredoxin dependent	681	206.2	184.9	-0.16	4	0.81696	1
Amuc_0866	mucin-associated surface protein (MASP)	573	5271	5826.9	0.14	13	1	1		Amuc_1974--Amuc_1975	intergenic	368	198.6	178.5	-0.15	5	0.81696	1
Amuc_1159	serine/threonine protein kinase	2301	2840.9	2910.6	0.03	1	1	1		Amuc_0325	conserved hypothetical protein	1293	191.2	188.1	-0.02	5	0.81696	1
Amuc_1404	Sel1 domain protein repeat-containing protein	1119	1724.4	1733.4	0.01	2	1	1		Amuc_0799--Amuc_0800	intergenic	237	182.1	206.3	0.18	4	0.81696	1
Amuc_1115	integrase family protein	1095	1642.5	1709.1	0.06	1	1	1		Amuc_1143	YD repeat protein	5973	169.1	173.7	0.04	3	0.81696	1
Amuc_0545--Amuc_0546	intergenic	175	1624.6	1747.1	0.1	1	1	1		Amuc_0815--Amuc_0816	intergenic	492	163.6	169	0.05	4	0.81696	1
Amuc_1217	hypothetical protein	414	984.4	1022.1	0.05	1	1	1		Amuc_2163	Sel1 domain protein repeat-containing protein	2760	163.5	123.8	-0.4	4	0.81696	1
Amuc_0292	hypothetical protein	840	951.2	751.7	-0.34	2	1	1		Amuc_1409--Amuc_1410	intergenic	168	158.5	170.4	0.1	3	0.81696	1
Amuc_1124	hypothetical protein	1521	836.8	617.7	-0.44	14	1	1		Amuc_1316--Amuc_1317	intergenic	747	156.6	166.8	0.09	3	0.81696	1
Amuc_1706	protein of unknown function DUF218	651	737.8	665.1	-0.15	2	1	1		Amuc_1596	protein of unknown function DUF111	1218	116	133.1	0.2	3	0.81696	1
Amuc_2112	hypothetical protein	2907	685.4	1030.3	0.59	254	1	1		Amuc_1588--Amuc_1589	intergenic	155	109.1	131.2	0.27	4	0.81696	1
Amuc_0838	ATP-cone domain protein	489	628.5	628.7	0	1	1	1		Amuc_0327	hypothetical protein	585	107.9	156.6	0.54	4	0.81696	1
Amuc_0020	major facilitator superfamily MFS_1	1152	603.9	671.4	0.15	1	1	1		Amuc_1065	hypothetical protein	642	88.8	87.5	-0.02	4	0.81696	1
Amuc_1711	conserved hypothetical phage related protein	720	548.4	482.7	-0.18	2	1	1		Amuc_1216	oxidoreductase domain protein	1275	87.4	98.6	0.17	3	0.81696	1
Amuc_0575--Amuc_0576	intergenic	206	433.2	439.3	0.02	1	1	1		Amuc_1378	integrase family protein	1248	87.2	92.3	0.08	4	0.81696	1
Amuc_1887	MscS Mechanosensitive ion channel	2433	422.3	478.3	0.18	1	1	1		Amuc_1200	cobalamin (vitamin B12) biosynthesis CbiM protein	1041	81.4	89.8	0.14	4	0.81696	1
Amuc_1538	OsmC family protein	408	399	386.5	-0.05	1	1	1		Amuc_0865	Rubrerythrin	546	80.4	80.3	0	3	0.81696	1
Amuc_0580	Entericidin EcnAB	141	398.8	396.8	-0.01	1	1	1		Amuc_0246	transcriptional regulator, MarR family	399	80.3	57.3	-0.49	4	0.81696	1
Amuc_0893	conserved hypothetical protein	441	385	514	0.42	1	1	1		Amuc_0555	protein of unknown function DUF21	1329	66.4	62	-0.1	4	0.81696	1
Amuc_0550--Amuc_0551	intergenic	899	371.5	356.1	-0.06	2	1	1		Amuc_1723	outer membrane autotransporter barrel domain protein	5859	64.5	60.3	-0.1	3	0.81696	1
Amuc_1504--Amuc_1505	intergenic	272	369.2	404.6	0.13	1	1	1		Amuc_0504	hypothetical protein	561	59	59.1	0	4	0.81696	1
Amuc_0603	hypothetical protein	540	330	466.9	0.5	1	1	1		Amuc_0688	hypothetical protein	738	56.7	53	-0.1	5	0.81696	1
Amuc_1321	alkyl hydroperoxide reductase/ Thiol specific antioxidant/ Mal allergen	621	323.4	305.5	-0.08	2	1	1		Amuc_1293--Amuc_1294	intergenic	229	56.5	101	0.84	4	0.81696	1
Amuc_2119	ATPase associated with various cellular activities AAA_3	1002	271.4	362.5	0.42	13	1	1		Amuc_1222	oligopeptide transporter, OPT superfamily	1866	51.2	34.5	-0.57	5	0.81696	1
Amuc_1213	hypothetical protein	441	256	265.4	0.05	38	1	1		Amuc_2050	protein of unknown function DUF1568	1008	47.1	85.8	0.86	3	0.81696	1
Amuc_1247	Na+/H+ antiporter NhaC	1323	225	232	0.04	1	1	1		Amuc_0017	oxidoreductase domain protein	1443	40.6	54.2	0.42	4	0.81696	1
Amuc_0233	L-threonine 3-dehydrogenase	1035	223.2	207.4	-0.11	2	1	1		Amuc_0332	hypothetical protein	447	39.5	30.2	-0.39	5	0.81696	1
Amuc_2077--Amuc_2078	intergenic	127	207.1	223.3	0.11	1	1	1		Amuc_0883	hypothetical protein	186	35.9	39.8	0.15	3	0.81696	1
Amuc_0870	Alkaline phosphatase	1143	204.3	197.2	-0.05	1	1	1		Amuc_0552	Indole-3-glycerol-phosphate synthase	783	26.6	23.2	-0.2	5	0.81696	1
Amuc_1261	Aldose 1-epimerase	852	202.9	207.5	0.03	1	1	1		Amuc_1108--Amuc_1109	intergenic	579	23.4	24.8	0.09	4	0.81696	1
Amuc_2001	putative lipoprotein	2037	185.5	185	0	1	1	1		Amuc_1252	glutamine synthetase catalytic region	2133	16.7	19	0.18	4	0.81696	1
Amuc_0035	hypothetical protein	411	185	181.1	-0.03	1	1	1		Amuc_0824	glycoside hydrolase family 2 TIM barrel	3792	971.6	966.6	-0.01	1809	0.81786	1
Amuc_1644	transglutaminase domain protein	1137	184.3	169.9	-0.12	2	1	1		Amuc_1008	glycoside hydrolase family 31	3933	141.1	145.8	0.05	205	0.82058	1
Amuc_1770	transcriptional regulator, AsnC family	483	183.7	190.1	0.05	1	1	1		Amuc_1333	hypothetical protein	843	21473	30657	0.51	216	0.83784	1
Amuc_0690	hypothetical protein	1278	183.3	198.7	0.12	1	1	1		Amuc_1074	sulfatase	1656	3352.9	4488	0.42	335	0.84722	1
Amuc_0562--Amuc_0563	intergenic	144	180.7	195.8	0.12	2	1	1		Amuc_1409	conserved hypothetical protein	450	871.7	1136.1	0.38	46	0.85204	1
Amuc_2143--Amuc_2144	intergenic	252	178	195.2	0.13	1	1	1		Amuc_0785	3-isopropylmalate dehydrogenase	1107	4822.5	6384.6	0.4	138	0.85357	1
Amuc_0634	glycosyl transferase family 8	945	177	217.2	0.3	1	1	1		Amuc_1767	hypothetical protein	888	512.1	615.3	0.26	23	0.85424	1
Amuc_0271	ribosomal protein S16	240	176.8	166.7	-0.08	1	1	1		Amuc_1484	hypothetical protein	1017	414.6	475.9	0.2	23	0.85424	1
Amuc_0239--Amuc_0240	intergenic	223	141.8	163	0.2	1	1	1		Amuc_0735	YD repeat protein	5814	378.8	340.4	-0.15	27	0.85424	1
Amuc_1145--Amuc_1146	intergenic	581	141.7	171.1	0.27	1	1	1		Amuc_0834	transcriptional regulator, MarR family with acetyltransferase activity	954	6699.9	9713.7	0.54	388	0.85689	1
Amuc_1528	V-type H(+)-translocating pyrophosphatase	2226	140	133.2	-0.07	2	1	1		Amuc_2112	hypothetical protein	2907	731.8	920.7	0.33	175	0.86984	1
Amuc_1747	cytidyltransferase-related domain protein	1353	134.1	134.4	0	2	1	1		Amuc_0461	PDZ/DHR/GLGF domain protein	873	5517.1	4125.7	-0.42	104	0.87763	1
Amuc_1266--Amuc_1267	intergenic	510	130.3	115.5	-0.17	2	1	1		Amuc_1185	aminotransferase class I and II	1593	129.7	147.7	0.19	61	0.87832	1
Amuc_0672--Amuc_0673	intergenic	530	130.1	131	0.01	1	1	1		Amuc_1951	NADH:flavin oxidoreductase/NADH oxidase	1101	118	129.3	0.13	34	0.88822	1
Amuc_1507--Amuc_1508	intergenic	63	128.7	140.8	0.13	1	1	1		Amuc_1179	ABC transporter related	795	16845	16997.8	0.01	34	0.88827	1
Amuc_0150	hypothetical protein	1026	124.6	124.5	0	1	1	1		Amuc_2136	Glycoside hydrolase, family 20, catalytic core	2268	285.8	435.6	0.61	34	0.88827	1
Amuc_1930	transport system permease protein	1008	116.6	122.3	0.07	1	1	1		Amuc_1184	Phosphopyruvate hydratase	1278	218.4	181.9	-0.26	34	0.88827	1
Amuc_1896--Amuc_1897	intergenic	128	112.6	108.1	-0.06	2	1	1		Amuc_1209	hypothetical protein	747	39801.2	51638.5	0.38	10	0.89728	1
Amuc_0477	hypothetical protein	282	111.3	106.8	-0.06	2	1	1		Amuc_1057	hypothetical protein	270	8636.4	7578.3	-0.19	10	0.89728	1
Amuc_0039--Amuc_0040	intergenic	460	108.3	125.3	0.21	1	1	1		Amuc_2170--Amuc_2171	intergenic	423	7118.3	13916.7	0.97	8	0.89728	1
Amuc_1649	beta-phosphoglucomutase family hydrolase	606	106	106.9	0.01	1	1	1		Amuc_0866	mucin-associated surface protein (MASP)	573	5622.1	5624.8	0	9	0.89728	1
Amuc_1420--Amuc_1421	intergenic	337	105.9	121.3	0.2	1	1	1		Amuc_0275	preprotein translocase, YajC subunit	330	3093.3	2433.2	-0.35	10	0.89728	1
Amuc_1138	hypothetical protein	591	96.6	107.7	0.16	1	1	1		Amuc_0154	hypothetical protein	603	2651	3845.5	0.54	10	0.89728	1
Amuc_1735	hypothetical protein	234	92.3	95.6	0.05	1	1	1		Amuc_0711	sodium/hydrogen exchanger	1743	2360.5	2747.4	0.22	10	0.89728	1
Amuc_0392	coagulation factor 5/8 type domain protein	2127	91.8	95.2	0.05	1	1	1		Amuc_1310--Amuc_1311	intergenic	142	1951.2	1606.6	-0.28	10	0.89728	1
Amuc_1377	DnaB domain protein helicase domain protein	1311	87.5	89.7	0.04	1	1	1		Amuc_1703	Ferroxidase	492	1513.8	2172	0.52	8	0.89728	1
Amuc_1939	efflux transporter, RND family, MFP subunit	1110	86.5	88	0.03	14	1	1		Amuc_0341	hypothetical protein	459	1346.5	2180.2	0.7	9	0.89728	1
Amuc_2022	Alkyl sulfatase and related hydrolase-like protein	1473	84.8	97.3	0.2	1	1	1		Amuc_1124	hypothetical protein	1521	895.3	753.1	-0.25	10	0.89728	1
Amuc_2022--Amuc_2023	intergenic	233	78.2	75.9	-0.04	1	1	1		Amuc_1702--Amuc_1703	intergenic	114	615.6	591.4	-0.06	10	0.89728	1
Amuc_1751--Amuc_1752	intergenic	122	72.6	87.9	0.28	1	1	1		Amuc_0237	arsenate reductase and related	357	434.6	508.6	0.23	8	0.89728	1
Amuc_0868	Beta-N-acetylhexosaminidase	1647	70.4	75.6	0.1	1	1	1		Amuc_0946	DJ-1 family protein	561	336.7	412.8	0.29	8	0.89728	1
Amuc_1033	sulfatase	1743	69.7	81.6	0.23	14	1	1		Amuc_2068	pseduogene	447	306.7	314.4	0.04	9	0.89728	1
Amuc_0700	hypothetical protein	417	60.8	57.9	-0.07	2	1	1		Amuc_2119	ATPase associated with various cellular activities AAA_3	1002	289.5	484.1	0.74	8	0.89728	1
Amuc_0411	hypothetical protein	1440	59.8	71.7	0.26	1	1	1		Amuc_0236	Ion transport 2 domain protein	768	261.6	274	0.07	10	0.89728	1
Amuc_0075	PfkB domain protein	1065	58.7	56.1	-0.06	2	1	1		Amuc_0820	ErfK/YbiS/YcfS/YnhG family protein	729	261.4	240.1	-0.12	10	0.89728	1
Amuc_0418	Ankyrin	1056	55.5	52.5	-0.08	2	1	1		Amuc_1026	Peptidylprolyl isomerase	501	248.1	324.7	0.39	8	0.89728	1
Amuc_1695	cytochrome bd ubiquinol oxidase subunit I	1377	55.4	52	-0.09	2	1	1		Amuc_0917	peptidase U32	2505	213.4	185.8	-0.2	10	0.89728	1
Amuc_1422	recG	3174	53.8	54	0	2	1	1		Amuc_0772	phosphoglycerate mutase 1 family	1803	170.8	171.3	0	10	0.89728	1
Amuc_0374	DNA polymerase III, alpha subunit	3522	48.4	38.7	-0.33	2	1	1		Amuc_0244	tRNA (guanine-N1)-methyltransferase	717	168	171.6	0.03	9	0.89728	1
Amuc_0671	3-dehydroquinate synthase	1161	44.6	34.9	-0.35	2	1	1		Amuc_0242--Amuc_0243	intergenic	200	139.9	145.8	0.06	8	0.89728	1
Amuc_1985	hypothetical protein	2544	44.1	44.2	0	1	1	1		Amuc_1481	6-phosphofructokinase	1077	101.4	120.5	0.25	8	0.89728	1
Amuc_0152	Tubulin/FtsZ GTPase	1455	41.7	38.7	-0.11	2	1	1		Amuc_1569	hypothetical protein	519	98.2	104.7	0.09	9	0.89728	1
Amuc_0472	GTPase EngC	1119	41.5	41.4	0	2	1	1		Amuc_2153	hypothetical protein	798	84	110.9	0.4	9	0.89728	1
Amuc_0024	protein of unknown function DUF204	597	39.5	42.2	0.1	1	1	1		Amuc_1226	hypothetical protein	1038	83.5	92.1	0.14	9	0.89728	1
Amuc_0635	hypothetical protein	1245	36.6	41.9	0.2	1	1	1		Amuc_1498	protein of unknown function DUF152	687	61.1	82.5	0.43	8	0.89728	1
Amuc_0330	hypothetical protein	444	35.2	34.1	-0.05	1	1	1		Amuc_1037	conserved hypothetical protein	201	48.1	99.4	1.05	9	0.89728	1
Amuc_0693	conserved hypothetical protein	678	29.4	35.9	0.29	1	1	1		Amuc_2126	hypothetical protein	675	43.9	41.1	-0.09	9	0.89728	1
Amuc_0853	hypothetical protein	1461	28.3	32.8	0.22	1	1	1		Amuc_1473	hypothetical protein	1224	36	40.1	0.16	9	0.89728	1
Amuc_1166	hypothetical protein	867	26.2	20.5	-0.35	2	1	1		Amuc_1421	serine/threonine protein kinase	2613	165.9	147.7	-0.17	84	0.89769	1
Beg--Amuc_R0001	intergenic	504	24.1	22.4	-0.11	2	1	1		Amuc_1592	Superoxide dismutase	642	103.8	115.8	0.16	47	0.9109	1
Amuc_1056--Amuc_1057	intergenic	253	22.3	16.9	-0.4	2	1	1		Amuc_0242	pseudouridine synthase	1401	213.1	217.1	0.03	66	0.9268	1
Amuc_0889	efflux transporter, RND family, MFP subunit	1152	22.1	17.6	-0.33	2	1	1		Amuc_1398	hydrogenase accessory protein HypB	738	605.4	516	-0.23	17	0.93232	1
Amuc_1603	hypothetical protein	882	20.1	21.2	0.08	2	1	1		Amuc_0597	conserved hypothetical protein	504	549.6	187.9	-1.55	17	0.93232	1
Amuc_1402	hydrogenase expression/formation protein HypE	1032	20	15.5	-0.36	2	1	1		Amuc_0977	hypothetical protein	726	326	137.8	-1.24	17	0.93232	1
Amuc_2000	major facilitator superfamily MFS_1	1182	18.8	20.9	0.16	2	1	1		Amuc_1860	Formate--tetrahydrofolate ligase	1671	91.9	120.6	0.39	15	0.93232	1
Amuc_0401	hypothetical protein	594	18.7	21	0.16	2	1	1		Amuc_0066	putative ATP/GTP-binding protein	912	4384.6	6837.4	0.64	26	0.95113	1
Amuc_0368	hypothetical protein	852	18.4	20.2	0.13	1	1	1		Amuc_0065	2-isopropylmalate synthase	1554	85.5	110	0.36	26	0.95113	1
Amuc_2172	GCN5-related N-acetyltransferase	498	18	16.9	-0.09	1	1	1		Amuc_1028	hypothetical protein	648	64960.1	81654.6	0.33	24	0.95117	1
Amuc_0196	serine/threonine protein kinase	1641	16.2	17.1	0.08	1	1	1		Amuc_0109	transcriptional regulator, MarR family	423	845.3	1004.6	0.25	26	0.95117	1
Amuc_0364	hypothetical protein	1578	16.2	18.6	0.21	1	1	1		Amuc_1213	hypothetical protein	441	272.5	306.3	0.17	24	0.95117	1
Amuc_1177	Lipocalin family protein	507	16.1	18.4	0.19	1	1	1		Amuc_1521	DNA methylase N-4/N-6 domain protein	1896	80.3	79.4	-0.02	24	0.95117	1
Amuc_1967	Thioredoxin domain	507	16.1	12.8	-0.33	2	1	1		Amuc_0794	hypothetical protein	432	12315.4	12794.2	0.06	35	0.96265	1
Amuc_1563	protein of unknown function DUF6 transmembrane	915	16	14.8	-0.12	2	1	1		Amuc_0446	glycine cleavage system T protein	1083	3329.2	2778.7	-0.26	36	0.96265	1
Amuc_1667	glycoside hydrolase family 2 sugar binding	2574	15.5	14.2	-0.12	2	1	1		Amuc_2057	hypothetical protein	501	932.4	885	-0.08	36	0.96265	1
Amuc_0220	transporter, hydrophobe/amphiphile efflux-1 (HAE1) family	3168	13.7	16.8	0.3	1	1	1		Amuc_1622	hypothetical protein	606	650.5	813.1	0.32	36	0.96265	1
Amuc_0978	D-tyrosyl-tRNA(Tyr) deacylase	450	13.3	7.8	-0.77	2	1	1		Amuc_0895	conserved hypothetical protein	456	619.4	1031.3	0.74	36	0.96265	1
Amuc_1650--Amuc_1651	intergenic	711	13.2	11.9	-0.14	2	1	1		Amuc_0815	hypothetical protein	681	1119	870.6	-0.36	171	0.96436	1
Amuc_1588	hypothetical protein	507	13.1	16.3	0.32	1	1	1		Amuc_1123	hypothetical protein	1500	1488.5	2427.7	0.71	49	0.97024	1
Amuc_0207	hypothetical protein	699	12.9	11.9	-0.12	2	1	1		Amuc_0126	hypothetical protein	2307	199.4	234.1	0.23	64	0.97557	1
Amuc_0808	ATP-dependent helicase HrpA	3693	12.7	13.8	0.12	1	1	1		Amuc_0525	cycloartenol synthase-like protein	1176	563.4	659.2	0.23	81	0.97948	1
Amuc_1912--Amuc_1913	intergenic	372	12.7	16.8	0.4	1	1	1		Amuc_0428	hypothetical protein	825	1205.6	1630.1	0.44	144	0.98661	1
Amuc_0624	regulatory protein GntR HTH	1185	11.9	11.7	-0.03	2	1	1		Amuc_0372	glutamate decarboxylase	1398	229.3	235.9	0.04	145	0.98661	1
Amuc_0496	hypothetical protein	1794	10.3	7.6	-0.43	2	1	1		Amuc_1543	formate acetyltransferase	2265	1285.2	1635.4	0.35	399	0.99374	1

## Sheet: Fitness of selected mutants
Fitness of A. muciniphila mutants in genes previously predicted to be involved in mucin metabolism
Predicted function	Gene (Amuc_)	Input vs Output (Log2 fold change)
Fucose metabolism	10
	146	-1.89
	392	0.05
	846
	1833	1.06
	1832	-0.24
	1830
	1829	-4.27
	1566
Galactose metabolism
	824	-0.05
	1187	0.54
	1686	1.97
	969	-1.45
	1919
Glucose metabolism
	419	0.83
	97	-0.42
	1094
	1919
	1975
	1822
	1671
	210
	1481	0.05
	721
	562
	1417
	1418
	309	-4.01
Succinate CoA transferase
	Amuc_0206	-4.28
GlcNAc metabolism	52	-2
	60
	1220	-4.62
	516
	502	-1.25
	30	-3.09
	1918
	948
GalNac metabolism	369
	397	-0.76
	868	0.1
	1032	-0.17
	1815	0.45
	1924
	1669	-1.5
	2018
	2019
	2109
	2148	-3.97
Neu-Ac metabolism	623
	625	-0.28
	1547	-0.58
	1835	-5.93

## Sheet: Hypothetical proteins 
Hypothetical proteins required for growth in mucin
Hypothetical proteins identified by INSeq analysis with a Log2FC > 2 in mucin. BLAST was used to search for potential homologs in non-Akkermansia strains
ID	KEGG annotation	Homologs?	Homolog annotation	Pfam	INSeq Log2FC, mucin	Pvalue
Amuc_1100	hypothetical protein	PVC	pili-like protein	Bacteriophage Mu Gam like protein	-6.54	0.06675
Amuc_0394	hypothetical protein	PVC	pilin	Prokaryotic N-terminal methylation motif	-6.43	0.16314
Amuc_1102	hypothetical protein	PVC	hypothetical protein	no hits	-6.19	0.00185
Amuc_1834	hypothetical protein	PVC	hypothetical protein	no hits	-6.16	0.37109
Amuc_1229	hypothetical protein	PVC	hypothetical protein	Lantibiotic dehydratase domain	-6.07	0.37109
Amuc_1099	hypothetical protein	PVC	hypothetical protein	NifT	-6.06	0.34578
Amuc_1230	hypothetical protein	PVC	hypothetical protein	HsbA (PF12296)	-6.05	0.05473
Amuc_1443	hypothetical protein	PVC	TPR	TPR_12 (PF13424)	-6.04	0.02221
Amuc_0543	hypothetical protein	PVC	hypothetical protein	TPR_2 (PF07719)	-5.99	0.01225
Amuc_0544	Tetratricopeptide repeat	PVC	hypothetical protein	TPR_16 (PF13432)
Amuc_0547	hypothetical protein	PVC	exbD	Biopolymer transport protein ExbD/TolR	-5.9	0.06513
Amuc_0172	hypothetical protein	PVC	hypothetical protein	no hits	-5.73	0.37109
Amuc_1486	hypothetical protein	PVC	pilin	DUF3375	-5.25	0.34578
Amuc_1524	hypothetical protein	PVC	pilin/t2ss	Prokaryotic N-terminal methylation motif	-5.12	0.06675
Amuc_1054	hypothetical protein	PVC	hypothetical protein	no hits	-5.08	0.34578
Amuc_1196	hypothetical protein	PVC	hypothetical protein	DUF4878	-5.01	0.37109
Amuc_1105	hypothetical protein	PVC	duf3313	DUF3313	-5	0.06675
Amuc_0745	hypothetical protein	PVC	pilin/t2ss	Prokaryotic N-terminal methylation motif	-4.97	0.06513
Amuc_1602	hypothetical protein	PVC	hypothetical protein	no hits	-4.92	0.86763
Amuc_0668	hypothetical protein	PVC	hypothetical protein	SelB-wing_1	-4.57	0.00913
Amuc_1523	hypothetical protein	PVC	pilin	Prokaryotic N-terminal methylation motif	-4.54	0.06513
Amuc_0199	hypothetical protein	PVC	hypothetical protein	no hits	-4.02	0.06675
Amuc_0464	hypothetical protein	PVC	hypothetical protein	E1A-binding protein p400	-3.79	0.37109
Amuc_1246	hypothetical protein	PVC	hypothetical protein	PA14 domain	-3.63	4e-05
Amuc_1514	hypothetical protein	PVC	M60 metallopeptidase	Peptidase M60	-3.16	0.37109
Amuc_0769	hypothetical protein	PVC	transglutaminase	Transglutaminase	-2.75	0.24335
Amuc_0354	hypothetical protein	PVC	hypothetical protein	Outer membrane efflux protein	-2.61	0.40184
Amuc_0267	hypothetical protein	PVC	hypothetical protein	YceD	-2.05	0.5791
Amuc_0567	hypothetical protein	Firmicute	hypothetical protein	Periplasmic binding protein domain	-3.82	0.37109
Amuc_1119	hypothetical protein	Elizabethkingia miricola	discoidin domain	Putative peptidase	-2.71	0.37109
Amuc_0353	hypothetical protein	Candidate division TA06	acetylmuramate dehydrogenase	no hits	-2.39	0.06675
Amuc_1112	hypothetical protein	Akk only	hypothetical protein	no hits	-6.11	0.37109
Amuc_2107	hypothetical protein	Akk only	hypothetical protein	no hits	-2.11	0.37109
Amuc_0604	hypothetical protein	Akk only	hypothetical protein	PDZ domain	-2.01	0.37109
Amuc_0083	hypothetical protein	Akk only	hypothetical protein	DUF2381	-3.04	0.06675
Amuc_1272	hypothetical protein	Akk only	hypothetical protein	no hits	-2.76	0.37109
Amuc_1629	hypothetical protein	Akk only	hypothetical protein	no hits	-5.93	0.37109
Amuc_1147	hypothetical protein	Akk only	hypothetical protein	WED domain	-5.72	0.37109
Amuc_0839	hypothetical protein	Akk only	hypothetical protein	KorC regulated	-5.41	0.37109
Amuc_1969	hypothetical protein	Akk only	hypothetical protein	no hits	-5.4	0.34578
Amuc_0252	hypothetical protein	Akk only	hypothetical protein	GYF domain 2	-5.3	0.34578
Amuc_0817	hypothetical protein	Akk only	hypothetical protein	no hits	-4.33	0.37109
Amuc_0990	hypothetical protein	Akk only	PEP-CTERM	PEP-CTERM	-4.23	0.37109
Amuc_0174	hypothetical protein	Akk only	hypothetical protein	no hits	-4.37	0.34578
Amuc_0046	hypothetical protein	Akk only	hypothetical protein	no hits	-5.17	0.37109
Amuc_1373	hypothetical protein	Phage	phage	no hits	-4.99	0.37109
Amuc_1358	hypothetical protein	Phage	phage	no hits	-6.41	0.37109

## Sheet: RNAseq in vitro
DESeq2 transcriptional analysis of A. muciniphila grown in mucin vs synthetic media
ID	baseMean	Log2 fold change	lfcSE	stat	pvalue	padj
Amuc_1603	1910.18	3.1802	0.136908	23.2287	2.3e-119	4.9e-116
Amuc_0026	6363.06	3.73443	0.171846	21.7313	1e-104	1.1e-101
Amuc_0017	23300.8	4.22049	0.195382	21.6012	1.8e-103	1.2e-100
Amuc_0694	7188.46	3.13352	0.152691	20.522	1.37e-93	7.21e-91
Amuc_0724	5269.84	3.6523	0.18222	20.0433	2.31e-89	9.72e-87
Amuc_2136	16739.7	2.76639	0.139121	19.8848	5.51e-88	1.93e-85
Amuc_1252	4904.67	2.99867	0.151966	19.7324	1.14e-86	3.42e-84
Amuc_0025	7841.37	3.29821	0.169065	19.5085	9.3e-85	2.45e-82
Amuc_0627	12541.8	7.083	0.389087	18.2041	4.78e-74	1.12e-71
Amuc_0125	2419.84	6.41863	0.353847	18.1396	1.55e-73	3.27e-71
Amuc_0018	1533.51	3.47337	0.192177	18.0738	5.13e-73	9.81e-71
Amuc_1438	10557.1	3.22783	0.183761	17.5654	4.53e-69	7.96e-67
Amuc_0628	3108.15	6.94318	0.396314	17.5194	1.02e-68	1.65e-66
Amuc_1835	3924.21	3.62486	0.215523	16.8188	1.78e-63	2.67e-61
Amuc_1517	2074.41	3.25408	0.196946	16.5227	2.52e-61	3.54e-59
Amuc_0451	2033.08	1.8353	0.114877	15.9763	1.87e-57	2.46e-55
Amuc_2001	7386.57	3.47077	0.227357	15.2657	1.29e-52	1.6e-50
Amuc_1120	8799.52	2.32752	0.156677	14.8555	6.41e-50	7.5e-48
Amuc_0607	3935.45	5.59421	0.378038	14.798	1.51e-49	1.67e-47
Amuc_1253	6181.71	2.63665	0.178682	14.7561	2.81e-49	2.96e-47
Amuc_0565	1922.54	2.94647	0.204548	14.4048	4.83e-47	4.84e-45
Amuc_0185	403.331	4.58427	0.331387	13.8336	1.6e-43	1.53e-41
Amuc_1686	4731.64	2.17514	0.157979	13.7685	3.94e-43	3.61e-41
Amuc_0187	1640.68	4.26697	0.312028	13.675	1.43e-42	1.26e-40
Amuc_0394	11248.8	1.90084	0.139933	13.5839	4.99e-42	4.2e-40
Amuc_0868	3601.5	5.43228	0.400039	13.5794	5.31e-42	4.3e-40
Amuc_1687	1837.09	2.82766	0.210123	13.4571	2.8e-41	2.18e-39
Amuc_0920	9761.96	6.45169	0.481462	13.4002	6.03e-41	4.53e-39
Amuc_1008	12026.5	0.918176	0.068741	13.357	1.08e-40	7.83e-39
Amuc_0248	231.506	2.44258	0.184394	13.2465	4.72e-40	3.32e-38
Amuc_0480	5746.88	2.39327	0.182449	13.1175	2.61e-39	1.78e-37
Amuc_2036	583.937	-1.77784	0.136791	-12.9968	1.28e-38	8.39e-37
Amuc_2065	1481.34	4.19431	0.32398	12.9462	2.47e-38	1.58e-36
Amuc_0328	5259.97	1.77793	0.138505	12.8366	1.02e-37	6.31e-36
Amuc_0392	4161.37	2.40673	0.187549	12.8325	1.08e-37	6.31e-36
Amuc_1960	1065.97	3.45587	0.269279	12.8338	1.06e-37	6.31e-36
Amuc_0695	3346.63	2.42835	0.190858	12.7233	4.39e-37	2.5e-35
Amuc_0696	1318.95	2.40661	0.190591	12.6271	1.5e-36	8.29e-35
Amuc_0186	5687.43	4.27832	0.338968	12.6216	1.61e-36	8.67e-35
Amuc_1673	590.07	2.73519	0.217393	12.5818	2.66e-36	1.4e-34
Amuc_1841	2081.48	1.69782	0.13646	12.4419	1.55e-35	7.95e-34
Amuc_0901	747.958	1.88737	0.151938	12.422	1.99e-35	9.95e-34
Amuc_1602	777.911	2.60576	0.211892	12.2976	9.33e-35	4.57e-33
Amuc_1101	5624.17	1.8454	0.150712	12.2446	1.8e-34	8.6e-33
Amuc_0370	10344.9	3.40152	0.277874	12.2412	1.87e-34	8.76e-33
Amuc_0120	3224.68	2.97465	0.244179	12.1822	3.86e-34	1.77e-32
Amuc_0035	3105.12	2.27263	0.186604	12.1789	4.03e-34	1.8e-32
Amuc_1924	4400.08	3.0679	0.253889	12.0836	1.29e-33	5.66e-32
Amuc_0290	9441.8	2.00719	0.166276	12.0715	1.49e-33	6.42e-32
Amuc_0019	1437.89	2.9346	0.24535	11.9609	5.7e-33	2.4e-31
Amuc_0172	4105.71	2.18248	0.183527	11.8919	1.3e-32	5.39e-31
Amuc_1815	2127.76	3.89378	0.32816	11.8655	1.79e-32	7.24e-31
Amuc_1793	716.211	4.39464	0.371148	11.8407	2.4e-32	9.56e-31
Amuc_1420	6085.31	5.9306	0.503697	11.7741	5.31e-32	2.07e-30
Amuc_0808	3102.26	-1.68294	0.143713	-11.7104	1.13e-31	4.32e-30
Amuc_0084	2689.77	2.12983	0.184122	11.5675	6.02e-31	2.26e-29
Amuc_0166	1134.38	1.64152	0.142713	11.5022	1.29e-30	4.75e-29
Amuc_0119	2134.71	2.74488	0.243705	11.2631	2e-29	7.25e-28
Amuc_1362	77540.7	2.32161	0.20634	11.2514	2.28e-29	8.14e-28
Amuc_1881	572.52	-2.19051	0.195337	-11.214	3.48e-29	1.22e-27
Amuc_0751	3041.99	2.43729	0.217725	11.1944	4.35e-29	1.5e-27
Amuc_1993	1097.4	-1.68044	0.150439	-11.1702	5.7e-29	1.94e-27
Amuc_0715	1384.54	1.34313	0.120742	11.1239	9.6e-29	3.21e-27
Amuc_1342	3558.23	2.55196	0.23105	11.0451	2.32e-28	7.62e-27
Amuc_1100	3069.29	2.2151	0.201244	11.0071	3.53e-28	1.14e-26
Amuc_0090	1087.14	-1.54557	0.140648	-10.9889	4.32e-28	1.38e-26
Amuc_1093	553.364	-1.13367	0.103393	-10.9646	5.65e-28	1.78e-26
Amuc_1099	4511.8	2.27128	0.208279	10.905	1.09e-27	3.38e-26
Amuc_1703	3623.07	1.85793	0.17633	10.5367	5.85e-26	1.79e-24
Amuc_0517	1191.21	3.3555	0.323444	10.3743	3.25e-25	9.77e-24
Amuc_0165	1136.58	1.39336	0.134716	10.343	4.5e-25	1.34e-23
Amuc_1755	8570.72	2.54481	0.24773	10.2725	9.37e-25	2.74e-23
Amuc_0900	1164.85	1.69325	0.164914	10.2675	9.87e-25	2.85e-23
Amuc_0280	611.705	-2.17506	0.212501	-10.2355	1.37e-24	3.91e-23
Amuc_0121	4408.26	2.79953	0.274474	10.1996	1.99e-24	5.59e-23
Amuc_0803	5779.45	4.02463	0.394709	10.1965	2.06e-24	5.7e-23
Amuc_0344	1023.68	2.44919	0.240404	10.1878	2.25e-24	6.15e-23
Amuc_2109	508.627	-1.93251	0.190337	-10.1531	3.21e-24	8.67e-23
Amuc_0036	28656.6	1.98293	0.197244	10.0532	8.89e-24	2.37e-22
Amuc_0919	1346.49	1.12344	0.11178	10.0504	9.15e-24	2.41e-22
Amuc_1187	5177.46	4.44983	0.446962	9.95573	2.38e-23	6.19e-22
Amuc_0693	1118.77	1.76626	0.177964	9.92482	3.25e-23	8.34e-22
Amuc_1843	4199.12	-2.09798	0.212333	-9.88064	5.05e-23	1.28e-21
Amuc_0175	7974.03	-1.25016	0.126588	-9.87585	5.3e-23	1.33e-21
Amuc_1672	1176.18	4.78993	0.48541	9.86779	5.74e-23	1.42e-21
Amuc_1216	2142.89	1.56588	0.159193	9.83635	7.85e-23	1.92e-21
Amuc_0898	7969.78	-1.14249	0.116165	-9.83501	7.96e-23	1.93e-21
Amuc_0524	1673.17	1.23172	0.125493	9.81504	9.7e-23	2.32e-21
Amuc_2019	1440.77	1.86872	0.190762	9.79605	1.17e-22	2.77e-21
Amuc_1467	1348.4	1.49404	0.153083	9.75968	1.68e-22	3.92e-21
Amuc_0832	464.818	4.27437	0.438285	9.75248	1.8e-22	4.17e-21
Amuc_0240	7178.36	2.01778	0.208684	9.66905	4.08e-22	9.34e-21
Amuc_1032	1610.06	1.3104	0.135932	9.64007	5.42e-22	1.23e-20
Amuc_1833	1008.11	1.98791	0.207809	9.56601	1.11e-21	2.49e-20
Amuc_2169	9460.6	-2.04781	0.215592	-9.49851	2.13e-21	4.72e-20
Amuc_2120	1800.71	1.31361	0.138323	9.49666	2.17e-21	4.75e-20
Amuc_1102	1408.29	1.78583	0.188363	9.48079	2.52e-21	5.48e-20
Amuc_0825	700.21	2.32445	0.245801	9.45664	3.18e-21	6.83e-20
Amuc_0325	3169.05	1.44213	0.153596	9.3891	6.05e-21	1.29e-19
Amuc_1363	994.006	2.06211	0.220247	9.36273	7.77e-21	1.64e-19
Amuc_2020	1311.94	1.38663	0.14902	9.305	1.34e-20	2.79e-19
Amuc_0990	187.977	2.65189	0.285029	9.30393	1.35e-20	2.79e-19
Amuc_0697	1188.56	2.5308	0.273233	9.26245	2e-20	4.09e-19
Amuc_0539	3549.41	2.83249	0.305863	9.26065	2.03e-20	4.11e-19
Amuc_1769	9893.54	1.92223	0.207778	9.25136	2.22e-20	4.45e-19
Amuc_0188	1918.89	3.33034	0.360425	9.24004	2.46e-20	4.9e-19
Amuc_1493	573.313	1.52113	0.164881	9.22561	2.82e-20	5.55e-19
Amuc_2035	897.522	1.5377	0.166778	9.22001	2.97e-20	5.79e-19
Amuc_1707	1299.96	5.96261	0.646973	9.21617	3.08e-20	5.95e-19
Amuc_0270	525.407	1.9406	0.210616	9.21392	3.14e-20	6.02e-19
Amuc_1061	1018.44	2.0013	0.217497	9.20154	3.53e-20	6.69e-19
Amuc_1276	1060.2	2.85367	0.312193	9.14074	6.2e-20	1.17e-18
Amuc_1456	3702.94	-4.11941	0.452894	-9.09575	9.39e-20	1.75e-18
Amuc_1571	558.436	-1.44872	0.159489	-9.08353	1.05e-19	1.94e-18
Amuc_0282	565.014	1.4148	0.1565	9.04025	1.56e-19	2.86e-18
Amuc_0491	2043.46	4.64521	0.515404	9.01276	2.01e-19	3.65e-18
Amuc_0495	2507.25	1.70768	0.189708	9.00164	2.22e-19	4e-18
Amuc_1922	3330.44	1.55995	0.173575	8.9872	2.54e-19	4.53e-18
Amuc_0091	640.406	-1.85493	0.206548	-8.98063	2.69e-19	4.76e-18
Amuc_2163	34269.4	-1.62878	0.181429	-8.9775	2.77e-19	4.86e-18
Amuc_0896	3879.07	-1.28675	0.143514	-8.966	3.07e-19	5.35e-18
Amuc_0520	1100.52	1.32528	0.148041	8.95209	3.49e-19	6.02e-18
Amuc_0455	830.763	1.13785	0.127494	8.92472	4.47e-19	7.65e-18
Amuc_0326	3116.94	1.36704	0.15369	8.89475	5.86e-19	9.94e-18
Amuc_1736	308.562	-1.27319	0.143388	-8.87937	6.72e-19	1.13e-17
Amuc_1274	422.041	2.84601	0.322333	8.82941	1.05e-18	1.76e-17
Amuc_2018	802.81	3.59849	0.413696	8.69841	3.37e-18	5.58e-17
Amuc_0241	3961.28	-1.58184	0.182471	-8.66903	4.36e-18	7.17e-17
Amuc_1639	4104.59	1.2418	0.143768	8.63753	5.74e-18	9.38e-17
Amuc_1521	3487.74	0.987094	0.114563	8.61616	6.92e-18	1.12e-16
Amuc_1057	12688	-2.19142	0.255324	-8.58289	9.25e-18	1.49e-16
Amuc_1182	2951.78	4.52013	0.530166	8.52587	1.52e-17	2.42e-16
Amuc_1473	4456.41	1.4779	0.173693	8.50867	1.76e-17	2.79e-16
Amuc_1786	1436.88	0.863756	0.101685	8.49445	1.99e-17	3.13e-16
Amuc_1671	1671.11	1.23729	0.146553	8.4426	3.1e-17	4.84e-16
Amuc_0202	2983.92	1.13522	0.135432	8.38221	5.19e-17	8.04e-16
Amuc_0794	5039.95	1.31083	0.156871	8.35614	6.48e-17	9.96e-16
Amuc_1985	3985.46	1.10395	0.132697	8.31938	8.84e-17	1.35e-15
Amuc_1542	621.623	-1.63418	0.196635	-8.31073	9.51e-17	1.44e-15
Amuc_0203	844.41	1.41493	0.170512	8.2981	1.06e-16	1.59e-15
Amuc_1392	1066.93	-1.29251	0.15651	-8.25834	1.48e-16	2.21e-15
Amuc_0936	566.231	-1.58199	0.191939	-8.24215	1.69e-16	2.51e-15
Amuc_1842	7866.93	-2.58627	0.314046	-8.23532	1.79e-16	2.64e-15
Amuc_1586	3361.76	1.33232	0.161839	8.23238	1.84e-16	2.68e-15
Amuc_2046	2205	0.833112	0.101225	8.23027	1.87e-16	2.71e-15
Amuc_1133	739.032	2.56714	0.312596	8.21234	2.17e-16	3.13e-15
Amuc_0447	2725.63	1.6332	0.199889	8.17054	3.07e-16	4.4e-15
Amuc_0563	1538.45	1.31575	0.161342	8.15501	3.49e-16	4.97e-15
Amuc_1583	2486.43	1.94314	0.239214	8.12304	4.55e-16	6.43e-15
Amuc_1215	403.852	1.3659	0.16895	8.08463	6.24e-16	8.75e-15
Amuc_1896	995.931	1.54337	0.191114	8.07567	6.71e-16	9.36e-15
Amuc_0878	882.503	-1.15039	0.142494	-8.07323	6.85e-16	9.49e-15
Amuc_1135	411.92	2.29983	0.284991	8.06984	7.04e-16	9.69e-15
Amuc_0569	354.298	-1.61869	0.201746	-8.02344	1.03e-15	1.41e-14
Amuc_0327	1066.17	1.4919	0.18639	8.00416	1.2e-15	1.63e-14
Amuc_1273	478.296	2.5708	0.322226	7.97825	1.48e-15	2e-14
Amuc_1457	626.758	-1.56646	0.196633	-7.96639	1.63e-15	2.19e-14
Amuc_0826	669.675	1.88765	0.238985	7.89861	2.82e-15	3.76e-14
Amuc_0496	568.162	-1.42253	0.180975	-7.86041	3.83e-15	5.07e-14
Amuc_2107	4186.39	1.29205	0.164612	7.84909	4.19e-15	5.52e-14
Amuc_1491	614.176	-0.927856	0.118454	-7.83303	4.76e-15	6.23e-14
Amuc_1134	1291.74	2.31939	0.296281	7.82836	4.94e-15	6.43e-14
Amuc_1195	682.117	-1.27022	0.162679	-7.80816	5.8e-15	7.5e-14
Amuc_1718	605.706	1.40718	0.180258	7.80647	5.88e-15	7.55e-14
Amuc_1997	623.83	-1.69099	0.217239	-7.78404	7.02e-15	8.97e-14
Amuc_1039	978.271	1.09341	0.140558	7.7791	7.3e-15	9.27e-14
Amuc_0546	5057.56	0.834028	0.107388	7.76649	8.07e-15	1.02e-13
Amuc_R0046	329.886	-1.85668	0.240204	-7.72961	1.08e-14	1.35e-13
Amuc_2106	2824.55	-2.24025	0.290148	-7.72106	1.15e-14	1.44e-13
Amuc_2024	930.162	-1.67111	0.21662	-7.71448	1.21e-14	1.5e-13
Amuc_0845	265.424	-0.998183	0.129633	-7.70005	1.36e-14	1.68e-13
Amuc_0852	477.526	1.39588	0.181682	7.68307	1.55e-14	1.9e-13
Amuc_1774	6759.2	-1.44938	0.188774	-7.67787	1.62e-14	1.97e-13
Amuc_2155	672.892	2.34725	0.306072	7.66896	1.73e-14	2.1e-13
Amuc_0481	1044.16	1.27069	0.166543	7.62983	2.35e-14	2.83e-13
Amuc_0580	19254.6	2.09272	0.274986	7.61026	2.74e-14	3.27e-13
Amuc_0043	801.006	-0.827305	0.109577	-7.55001	4.35e-14	5.18e-13
Amuc_2148	2232.69	2.65259	0.351944	7.53697	4.81e-14	5.69e-13
Amuc_0238	1713.24	2.20306	0.292947	7.52033	5.46e-14	6.43e-13
Amuc_1220	2887.32	2.41135	0.320831	7.51595	5.65e-14	6.61e-13
Amuc_1732	3955.32	-1.11855	0.149064	-7.50384	6.2e-14	7.21e-13
Amuc_1865	497.918	-1.09758	0.147483	-7.44207	9.91e-14	1.15e-12
Amuc_0288	345.197	-1.69509	0.228079	-7.43203	1.07e-13	1.23e-12
Amuc_0193	1388.04	-1.04566	0.141455	-7.39214	1.44e-13	1.65e-12
Amuc_1823	1136.43	1.87066	0.253089	7.39131	1.45e-13	1.66e-12
Amuc_2119	1416.25	1.06159	0.143822	7.38126	1.57e-13	1.78e-12
Amuc_1976	3015.43	-1.56301	0.211824	-7.37884	1.6e-13	1.8e-12
Amuc_1119	768.105	1.05864	0.143966	7.35343	1.93e-13	2.16e-12
Amuc_2044	247.647	3.22831	0.439234	7.34987	1.98e-13	2.21e-12
Amuc_0515	505.908	-1.82954	0.24917	-7.34256	2.1e-13	2.32e-12
Amuc_0042	1258	-1.14007	0.155566	-7.32853	2.33e-13	2.57e-12
Amuc_2108	1069.93	1.98515	0.27144	7.31339	2.6e-13	2.86e-12
Amuc_0797	949.871	-1.37318	0.188019	-7.30342	2.81e-13	3.06e-12
Amuc_1818	1731.33	-1.46126	0.200127	-7.30166	2.84e-13	3.09e-12
Amuc_0763	312.484	1.89456	0.259838	7.2913	3.07e-13	3.32e-12
Amuc_0645	1112.25	-1.32454	0.182019	-7.2769	3.42e-13	3.65e-12
Amuc_2114	1185.22	-1.36591	0.18769	-7.27748	3.4e-13	3.65e-12
Amuc_1652	587.772	-1.43299	0.197308	-7.26269	3.79e-13	4.04e-12
Amuc_1554	139.447	-1.47042	0.202825	-7.24969	4.18e-13	4.42e-12
Amuc_0771	2825.51	1.88681	0.260519	7.2425	4.4e-13	4.64e-12
Amuc_2147	607.532	2.05727	0.284296	7.23635	4.61e-13	4.83e-12
Amuc_0518	614.578	2.95657	0.40933	7.22295	5.09e-13	5.3e-12
Amuc_1864	1881.41	-1.44057	0.199666	-7.2149	5.4e-13	5.6e-12
Amuc_1180	786.175	-2.05483	0.285133	-7.20656	5.74e-13	5.92e-12
Amuc_1484	1219.65	0.996692	0.13837	7.2031	5.89e-13	6.02e-12
Amuc_1597	3829.17	-0.974143	0.135232	-7.20347	5.87e-13	6.02e-12
Amuc_0698	919.883	2.11339	0.293675	7.19636	6.18e-13	6.29e-12
Amuc_1714	2498.05	-1.25132	0.174128	-7.18618	6.66e-13	6.75e-12
Amuc_0048	514.095	-1.2271	0.172399	-7.11775	1.1e-12	1.11e-11
Amuc_0704	3783.08	-1.71836	0.241685	-7.10991	1.16e-12	1.16e-11
Amuc_1880	1318.92	-1.70679	0.240867	-7.08603	1.38e-12	1.38e-11
Amuc_1060	1139.52	1.693	0.240604	7.03647	1.97e-12	1.96e-11
Amuc_2057	3359.23	0.963187	0.137829	6.98828	2.78e-12	2.75e-11
Amuc_1241	1984.69	0.737896	0.105621	6.98625	2.82e-12	2.78e-11
Amuc_0244	1574.3	-1.34058	0.192887	-6.95009	3.65e-12	3.58e-11
Amuc_0250	356.551	2.9281	0.421485	6.9471	3.73e-12	3.64e-11
Amuc_1722	724.873	1.50367	0.217165	6.92409	4.39e-12	4.26e-11
Amuc_0789	2067.48	0.753008	0.109049	6.90524	5.01e-12	4.84e-11
Amuc_0139	1150.5	-1.46907	0.213831	-6.87022	6.41e-12	6.16e-11
Amuc_0764	222.075	1.69933	0.248243	6.84543	7.62e-12	7.3e-11
Amuc_1522	5616.1	0.840503	0.123025	6.83199	8.37e-12	7.98e-11
Amuc_0255	941.613	-1.05962	0.155158	-6.82933	8.53e-12	8.09e-11
Amuc_0538	529.158	1.14511	0.168066	6.8135	9.53e-12	9e-11
Amuc_2153	3449.29	2.30439	0.338956	6.79849	1.06e-11	9.94e-11
Amuc_1288	739.58	-1.12078	0.164979	-6.79347	1.09e-11	1.02e-10
Amuc_1426	12347.9	-1.6645	0.245174	-6.78904	1.13e-11	1.05e-10
Amuc_1601	457.754	-1.62262	0.239025	-6.7885	1.13e-11	1.05e-10
Amuc_1029	431.847	-1.15255	0.169796	-6.78783	1.14e-11	1.05e-10
Amuc_1961	5104.94	-1.85817	0.27417	-6.77744	1.22e-11	1.12e-10
Amuc_1988	1450.79	1.24816	0.184605	6.76125	1.37e-11	1.25e-10
Amuc_2025	6170.57	-1.44585	0.21435	-6.74525	1.53e-11	1.39e-10
Amuc_1716	1089.66	-1.72393	0.256295	-6.72635	1.74e-11	1.58e-10
Amuc_0020	2053.09	-2.05711	0.305922	-6.7243	1.76e-11	1.59e-10
Amuc_1831	1251.83	1.54703	0.232085	6.66578	2.63e-11	2.37e-10
Amuc_0460	29804.4	1.73547	0.261449	6.6379	3.18e-11	2.85e-10
Amuc_0006	1931.61	0.795676	0.120063	6.62717	3.42e-11	3.04e-10
Amuc_1627	313.155	-1.00962	0.152336	-6.62758	3.41e-11	3.04e-10
Amuc_0999	9674.13	2.35388	0.355583	6.61978	3.6e-11	3.18e-10
Amuc_0182	2132.41	-1.61293	0.243773	-6.61653	3.68e-11	3.24e-10
Amuc_0204	8634.37	1.01802	0.154683	6.58135	4.66e-11	4.07e-10
Amuc_1188	44857.8	1.35307	0.205584	6.58159	4.65e-11	4.07e-10
Amuc_0525	7332.35	0.970281	0.147478	6.57914	4.73e-11	4.12e-10
Amuc_0469	1138.12	1.94	0.29566	6.56158	5.32e-11	4.61e-10
Amuc_0342	1239.82	0.760907	0.116106	6.55357	5.62e-11	4.85e-10
Amuc_0332	438.304	0.948526	0.145017	6.54078	6.12e-11	5.26e-10
Amuc_0551	1137.84	-0.873209	0.133602	-6.53589	6.32e-11	5.41e-10
Amuc_0965	3115.21	0.955537	0.146428	6.52562	6.77e-11	5.77e-10
Amuc_1569	26312.4	1.62477	0.249275	6.51797	7.13e-11	6.05e-10
Amuc_1638	5660.96	0.837665	0.128633	6.51204	7.41e-11	6.27e-10
Amuc_0145	1137.29	-1.07518	0.165411	-6.50005	8.03e-11	6.76e-10
Amuc_1268	2575.33	-0.75413	0.116048	-6.49844	8.12e-11	6.81e-10
Amuc_1458	130.95	-2.06473	0.318948	-6.47354	9.57e-11	8e-10
Amuc_1516	1804.5	1.46379	0.226422	6.46486	1.01e-10	8.44e-10
Amuc_0976	566.109	-0.661129	0.102582	-6.44487	1.16e-10	9.59e-10
Amuc_1564	365.57	2.68937	0.417643	6.4394	1.2e-10	9.91e-10
Amuc_2116	1092.79	1.03132	0.160884	6.41034	1.45e-10	1.19e-09
Amuc_2115	3885.6	-1.27728	0.20007	-6.38416	1.72e-10	1.41e-09
Amuc_1011	1469.32	1.84052	0.288467	6.38033	1.77e-10	1.44e-09
Amuc_1246	9601.82	2.30873	0.362113	6.37571	1.82e-10	1.48e-09
Amuc_0105	1537.5	1.51255	0.237277	6.37464	1.83e-10	1.49e-09
Amuc_1656	1973.49	1.10664	0.173685	6.37154	1.87e-10	1.51e-09
Amuc_1059	1834.65	1.18435	0.186214	6.36017	2.02e-10	1.62e-09
Amuc_1824	498.221	1.15402	0.18208	6.33797	2.33e-10	1.86e-09
Amuc_1325	787.662	-0.84377	0.133567	-6.31721	2.66e-10	2.12e-09
Amuc_0216	1488.97	1.35016	0.214042	6.30792	2.83e-10	2.25e-09
Amuc_0951	776.293	-1.57227	0.250052	-6.28774	3.22e-10	2.55e-09
Amuc_0092	491.082	-1.69183	0.269507	-6.27749	3.44e-10	2.71e-09
Amuc_0994	1710.02	1.05177	0.167861	6.26573	3.71e-10	2.91e-09
Amuc_1016	264.787	1.00437	0.160299	6.2656	3.71e-10	2.91e-09
Amuc_1989	1911.61	1.0728	0.172037	6.23588	4.49e-10	3.5e-09
Amuc_1027	2089.66	-0.744181	0.11939	-6.23317	4.57e-10	3.55e-09
Amuc_0083	491.801	1.21818	0.196118	6.21148	5.25e-10	4.06e-09
Amuc_1071	374.422	-1.83763	0.297353	-6.17994	6.41e-10	4.95e-09
Amuc_R0008	811.787	-2.1215	0.343454	-6.17696	6.53e-10	5.02e-09
Amuc_0313	506.659	0.984569	0.159716	6.1645	7.07e-10	5.41e-09
Amuc_1468	239.069	-1.65327	0.268305	-6.16192	7.19e-10	5.48e-09
Amuc_0316	1272.67	1.04384	0.169784	6.14805	7.84e-10	5.94e-09
Amuc_0699	507.481	1.84091	0.299423	6.14817	7.84e-10	5.94e-09
Amuc_0908	1089.06	2.93768	0.478189	6.14334	8.08e-10	6.1e-09
Amuc_0505	3350.62	0.664146	0.1085	6.12118	9.29e-10	6.99e-09
Amuc_2037	2301.24	-1.67331	0.273508	-6.11795	9.48e-10	7.1e-09
Amuc_0785	995.446	-1.11254	0.182087	-6.10993	9.97e-10	7.44e-09
Amuc_0104	1696.09	1.47926	0.243505	6.07488	1.24e-09	9.23e-09
Amuc_0356	1799.34	1.61798	0.266496	6.07131	1.27e-09	9.41e-09
Amuc_1511	932.473	1.65378	0.273133	6.05488	1.41e-09	1.04e-08
Amuc_1520	665.667	0.724639	0.119747	6.05144	1.44e-09	1.06e-08
Amuc_0806	521.52	-0.688891	0.113965	-6.04476	1.5e-09	1.1e-08
Amuc_0454	823.232	0.761691	0.126554	6.01871	1.76e-09	1.29e-08
Amuc_0179	1304.6	-1.05785	0.176035	-6.00936	1.86e-09	1.36e-08
Amuc_2071	1319.52	-1.15883	0.193072	-6.00203	1.95e-09	1.42e-08
Amuc_0044	859.976	-1.21048	0.201704	-6.00126	1.96e-09	1.42e-08
Amuc_1149	330.515	1.53949	0.256603	5.9995	1.98e-09	1.43e-08
Amuc_1814	176.278	-2.35852	0.393201	-5.99824	1.99e-09	1.43e-08
Amuc_0655	2167.18	0.667101	0.111573	5.97906	2.24e-09	1.61e-08
Amuc_0122	678.228	1.93203	0.32354	5.97154	2.35e-09	1.68e-08
Amuc_1098	36530.6	1.28817	0.215896	5.96662	2.42e-09	1.72e-08
Amuc_1889	1033.46	-1.57819	0.26461	-5.9642	2.46e-09	1.74e-08
Amuc_0174	1109.28	1.78321	0.299024	5.96345	2.47e-09	1.75e-08
Amuc_0140	5139.84	-1.06454	0.178718	-5.95655	2.58e-09	1.81e-08
Amuc_0629	1563.13	-1.21255	0.203643	-5.95431	2.61e-09	1.83e-08
Amuc_0226	496.845	1.21917	0.205181	5.94191	2.82e-09	1.97e-08
Amuc_0242	6669.64	-1.24967	0.211163	-5.91802	3.26e-09	2.27e-08
Amuc_1537	31924.7	1.62497	0.274643	5.91665	3.29e-09	2.28e-08
Amuc_1364	381.033	1.22375	0.207304	5.9032	3.57e-09	2.47e-08
Amuc_0879	675.478	-1.03131	0.174772	-5.90093	3.61e-09	2.5e-08
Amuc_0766	659.202	-1.15201	0.195755	-5.88495	3.98e-09	2.74e-08
Amuc_0133	544.87	1.0793	0.183697	5.87543	4.22e-09	2.89e-08
Amuc_1791	1148.58	-0.845618	0.14416	-5.86582	4.47e-09	3.06e-08
Amuc_1185	3309.6	-0.87353	0.149119	-5.85795	4.69e-09	3.19e-08
Amuc_2038	3103.01	1.52412	0.260745	5.84525	5.06e-09	3.44e-08
Amuc_1103	1711.01	-1.01074	0.172972	-5.84337	5.12e-09	3.46e-08
Amuc_0982	2116.67	1.66798	0.285506	5.84217	5.15e-09	3.48e-08
Amuc_0063	181.356	-1.09012	0.186731	-5.83789	5.29e-09	3.56e-08
Amuc_0903	1034.37	1.69653	0.29066	5.83683	5.32e-09	3.57e-08
Amuc_0592	1084.14	-1.23353	0.211372	-5.83581	5.35e-09	3.58e-08
Amuc_0134	934.613	0.77157	0.132252	5.8341	5.41e-09	3.6e-08
Amuc_1657	1953.55	-1.59947	0.274209	-5.83301	5.44e-09	3.62e-08
Amuc_0860	21207.5	0.996711	0.170983	5.8293	5.57e-09	3.69e-08
Amuc_0435	42319	1.6672	0.286213	5.82505	5.71e-09	3.77e-08
Amuc_0612	1971.46	0.485327	0.083415	5.81824	5.95e-09	3.91e-08
Amuc_1957	245.99	-1.13568	0.195234	-5.81703	5.99e-09	3.93e-08
Amuc_1679	269.818	1.63358	0.281989	5.79308	6.91e-09	4.52e-08
Amuc_1343	656.167	2.66543	0.460618	5.78663	7.18e-09	4.68e-08
Amuc_0855	2765.39	1.11972	0.19356	5.78488	7.26e-09	4.72e-08
Amuc_0041	3235.94	-0.879069	0.152306	-5.77172	7.85e-09	5.07e-08
Amuc_0823	2296.36	-0.914378	0.158417	-5.77199	7.83e-09	5.07e-08
Amuc_1515	738.972	-1.18027	0.205002	-5.75736	8.54e-09	5.5e-08
Amuc_1485	1155.86	0.767974	0.133536	5.75105	8.87e-09	5.69e-08
Amuc_0201	6647.07	0.812214	0.141267	5.74951	8.95e-09	5.73e-08
Amuc_0934	1790.21	-1.7986	0.312885	-5.74845	9.01e-09	5.75e-08
Amuc_1139	2341.62	1.80115	0.314158	5.73327	9.85e-09	6.27e-08
Amuc_1393	1146.71	-1.13561	0.198243	-5.72839	1.01e-08	6.43e-08
Amuc_1883	1054.4	-1.91971	0.336536	-5.70432	1.17e-08	7.39e-08
Amuc_1425	732.499	1.24415	0.218291	5.69952	1.2e-08	7.58e-08
Amuc_0348	11226.6	-1.2117	0.212701	-5.69672	1.22e-08	7.68e-08
Amuc_1813	342.735	-1.41607	0.248917	-5.68891	1.28e-08	8.01e-08
Amuc_0419	3721.63	0.618221	0.108689	5.68796	1.29e-08	8.03e-08
Amuc_0759	318.731	-0.80489	0.14176	-5.67785	1.36e-08	8.5e-08
Amuc_0786	678.619	-1.16457	0.205248	-5.67397	1.4e-08	8.67e-08
Amuc_1504	1567.82	1.60218	0.282403	5.67339	1.4e-08	8.67e-08
Amuc_0341	101.486	-2.30965	0.407192	-5.67214	1.41e-08	8.71e-08
Amuc_0531	7468.37	-0.936407	0.165306	-5.66468	1.47e-08	9.07e-08
Amuc_1600	995.789	-1.19178	0.210788	-5.65393	1.57e-08	9.63e-08
Amuc_1481	2710.17	1.1264	0.199259	5.65292	1.58e-08	9.66e-08
Amuc_1576	209.259	-1.39426	0.246761	-5.65024	1.6e-08	9.78e-08
Amuc_0156	1991.86	-1.22486	0.217027	-5.6438	1.66e-08	1.01e-07
Amuc_1950	253.876	-1.72151	0.30582	-5.62916	1.81e-08	1.1e-07
Amuc_0358	504.137	-1.00319	0.17843	-5.62234	1.88e-08	1.14e-07
Amuc_0897	883.211	1.51556	0.270138	5.61031	2.02e-08	1.22e-07
Amuc_2041	1974.99	-1.47794	0.263436	-5.61023	2.02e-08	1.22e-07
Amuc_1326	228.978	-1.22941	0.219462	-5.60193	2.12e-08	1.27e-07
Amuc_1975	8108.8	-1.07023	0.191293	-5.59472	2.21e-08	1.32e-07
Amuc_0750	3116.11	-0.671899	0.120186	-5.59049	2.26e-08	1.35e-07
Amuc_0950	954.247	-1.45589	0.260713	-5.58428	2.35e-08	1.4e-07
Amuc_0756	1684.6	0.712835	0.127725	5.581	2.39e-08	1.42e-07
Amuc_1884	517.83	-1.7522	0.31421	-5.57653	2.45e-08	1.45e-07
Amuc_0804	1532.81	-1.0581	0.189867	-5.57284	2.51e-08	1.48e-07
Amuc_1394	444.009	1.73612	0.311633	5.57104	2.53e-08	1.49e-07
Amuc_0745	913.651	0.732554	0.131593	5.56683	2.59e-08	1.52e-07
Amuc_1179	1892.04	-1.59239	0.286602	-5.55609	2.76e-08	1.61e-07
Amuc_0911	419.501	-0.897088	0.161873	-5.54192	2.99e-08	1.75e-07
Amuc_0606	561.517	1.66545	0.300586	5.54069	3.01e-08	1.75e-07
Amuc_0040	403.929	-1.29244	0.234148	-5.51977	3.39e-08	1.97e-07
Amuc_0143	507.132	-1.00014	0.181331	-5.51553	3.48e-08	2.01e-07
Amuc_1012	1272.38	1.51518	0.275051	5.50871	3.61e-08	2.09e-07
Amuc_0200	1930.41	1.64369	0.298503	5.50645	3.66e-08	2.1e-07
Amuc_1143	48958.8	1.1161	0.202696	5.50625	3.67e-08	2.1e-07
Amuc_1574	611.669	1.0751	0.195219	5.50714	3.65e-08	2.1e-07
Amuc_1092	1372.42	-0.810653	0.147266	-5.5047	3.7e-08	2.11e-07
Amuc_0181	930.432	-1.43301	0.260983	-5.49083	4e-08	2.28e-07
Amuc_2010	4846.19	1.25705	0.228974	5.48994	4.02e-08	2.28e-07
Amuc_0359	1387.12	-0.81272	0.148123	-5.48678	4.09e-08	2.32e-07
Amuc_0158	462.644	-1.37476	0.251125	-5.4744	4.39e-08	2.48e-07
Amuc_0021	988.904	-1.13815	0.208033	-5.47101	4.47e-08	2.52e-07
Amuc_1421	6170.02	-1.06014	0.194054	-5.46313	4.68e-08	2.63e-07
Amuc_1649	422.9	-1.23872	0.226803	-5.46163	4.72e-08	2.64e-07
Amuc_0932	301.154	-1.99082	0.364856	-5.45644	4.86e-08	2.71e-07
Amuc_1631	6603.97	0.864747	0.158564	5.4536	4.94e-08	2.75e-07
Amuc_0452	8235.59	-1.8197	0.334372	-5.44216	5.26e-08	2.93e-07
Amuc_0647	357.796	-0.706412	0.129877	-5.43907	5.36e-08	2.97e-07
Amuc_2176	10341.3	-1.67853	0.308974	-5.4326	5.55e-08	3.07e-07
Amuc_1214	1896.11	0.999497	0.184318	5.42267	5.87e-08	3.24e-07
Amuc_1790	574.692	-0.848007	0.15662	-5.41442	6.15e-08	3.38e-07
Amuc_1552	997.467	-1.86448	0.3444	-5.4137	6.17e-08	3.39e-07
Amuc_1497	4419.35	1.64191	0.303476	5.41034	6.29e-08	3.44e-07
Amuc_1513	1516.19	0.741889	0.137214	5.40681	6.42e-08	3.5e-07
Amuc_0340	595.137	-0.602716	0.111485	-5.40624	6.44e-08	3.5e-07
Amuc_1086	790.77	2.99617	0.554709	5.40134	6.61e-08	3.59e-07
Amuc_1888	1358.22	-1.03195	0.191134	-5.3991	6.7e-08	3.63e-07
Amuc_0614	930.223	-0.684038	0.126787	-5.39517	6.85e-08	3.7e-07
Amuc_1116	782.487	0.83472	0.154824	5.39142	6.99e-08	3.77e-07
Amuc_0329	1436.84	0.842441	0.156812	5.37229	7.77e-08	4.18e-07
Amuc_0611	1859.64	-1.27353	0.237318	-5.36636	8.03e-08	4.31e-07
Amuc_0670	2517.2	0.931803	0.173788	5.36172	8.24e-08	4.41e-07
Amuc_0005	1100.89	1.36448	0.254551	5.36034	8.31e-08	4.43e-07
Amuc_0176	5638.13	-1.00991	0.188547	-5.35628	8.5e-08	4.52e-07
Amuc_1021	857.667	0.996224	0.186162	5.35138	8.73e-08	4.63e-07
Amuc_1962	351.948	-1.6719	0.313002	-5.34149	9.22e-08	4.88e-07
Amuc_1983	9903.08	0.92758	0.174027	5.33007	9.82e-08	5.18e-07
Amuc_1643	549.021	0.803633	0.150799	5.32917	9.87e-08	5.19e-07
Amuc_0722	3995.52	-1.94736	0.365789	-5.32374	1.02e-07	5.34e-07
Amuc_1219	4360.55	2.33966	0.440531	5.311	1.09e-07	5.71e-07
Amuc_1939	1759.76	-1.3527	0.254739	-5.31014	1.1e-07	5.72e-07
Amuc_1882	236.237	-1.23999	0.233777	-5.30414	1.13e-07	5.9e-07
Amuc_0599	284.624	-0.936986	0.177108	-5.29049	1.22e-07	6.34e-07
Amuc_1584	3781.64	1.50296	0.284436	5.28398	1.26e-07	6.56e-07
Amuc_0160	1246.87	-0.979171	0.185334	-5.28329	1.27e-07	6.57e-07
Amuc_2170	11569.6	-1.58693	0.300424	-5.28232	1.28e-07	6.58e-07
Amuc_0550	3549.51	-1.83476	0.348368	-5.26672	1.39e-07	7.15e-07
Amuc_0206	3688.04	0.811519	0.154307	5.25913	1.45e-07	7.43e-07
Amuc_0243	366.495	-1.49245	0.28413	-5.25269	1.5e-07	7.68e-07
Amuc_1072	319.018	-1.46998	0.279984	-5.25023	1.52e-07	7.77e-07
Amuc_0749	1245.22	-0.81165	0.154886	-5.24031	1.6e-07	8.17e-07
Amuc_0167	1115.23	1.32196	0.252679	5.23175	1.68e-07	8.54e-07
Amuc_0085	374.292	-0.862197	0.164872	-5.2295	1.7e-07	8.63e-07
Amuc_1541	967.582	-0.862775	0.165033	-5.22788	1.71e-07	8.68e-07
Amuc_1261	1443.02	-0.812949	0.155711	-5.22088	1.78e-07	8.99e-07
Amuc_0966	544.802	-0.740571	0.142201	-5.2079	1.91e-07	9.62e-07
Amuc_0892	804.426	-1.17322	0.225417	-5.20467	1.94e-07	9.74e-07
Amuc_1459	2432.78	-0.570729	0.109653	-5.20488	1.94e-07	9.74e-07
Amuc_1140	3907.44	1.58781	0.305399	5.19914	2e-07	1e-06
Amuc_0609	1101.87	-0.889247	0.171058	-5.19851	2.01e-07	1e-06
Amuc_2008	153.471	1.04212	0.200606	5.19486	2.05e-07	1.02e-06
Amuc_0970	7822.05	0.729561	0.140468	5.19379	2.06e-07	1.02e-06
Amuc_0159	2898.36	-1.02096	0.196718	-5.18998	2.1e-07	1.04e-06
Amuc_0552	2199.72	-0.693183	0.133949	-5.17499	2.28e-07	1.13e-06
Amuc_0153	4794.37	-0.865322	0.167256	-5.17362	2.3e-07	1.13e-06
Amuc_0746	3890.99	-1.42876	0.27632	-5.17068	2.33e-07	1.15e-06
Amuc_0151	1055.59	-1.35958	0.263138	-5.16678	2.38e-07	1.17e-06
Amuc_1850	5009.8	-0.68363	0.132655	-5.15344	2.56e-07	1.25e-06
Amuc_0371	2978.65	1.79958	0.349472	5.14942	2.61e-07	1.28e-06
Amuc_0256	1366.03	-0.761626	0.147962	-5.14746	2.64e-07	1.29e-06
Amuc_0459	2376.86	0.699169	0.135921	5.14395	2.69e-07	1.31e-06
Amuc_0430	1509.47	-0.710022	0.138359	-5.13174	2.87e-07	1.39e-06
Amuc_0320	868.247	-1.12276	0.219037	-5.12589	2.96e-07	1.43e-06
Amuc_1275	591.51	2.2568	0.440257	5.1261	2.96e-07	1.43e-06
Amuc_0277	322.446	-1.0015	0.195484	-5.12319	3e-07	1.45e-06
Amuc_1885	977.028	-1.15403	0.22559	-5.11563	3.13e-07	1.5e-06
Amuc_0101	1571.99	1.17887	0.23076	5.10863	3.25e-07	1.56e-06
Amuc_0822	451.601	-0.811348	0.159	-5.10282	3.35e-07	1.6e-06
Amuc_1661	3995.38	0.994297	0.19485	5.10289	3.35e-07	1.6e-06
Amuc_1446	280.6	-1.27068	0.249103	-5.10103	3.38e-07	1.61e-06
Amuc_1162	647.176	-2.04803	0.40161	-5.09954	3.4e-07	1.62e-06
Amuc_1078	960.683	-0.876971	0.172467	-5.08486	3.68e-07	1.74e-06
Amuc_0144	873.657	-0.754861	0.148529	-5.08224	3.73e-07	1.77e-06
Amuc_0657	2965.65	0.696771	0.137182	5.07918	3.79e-07	1.79e-06
Amuc_0102	2201.4	1.27179	0.251212	5.06263	4.14e-07	1.95e-06
Amuc_0032	1429.81	-0.867109	0.171293	-5.06213	4.15e-07	1.95e-06
Amuc_1895	3456.23	-1.8923	0.374715	-5.04999	4.42e-07	2.07e-06
Amuc_1827	7841.79	1.95621	0.388289	5.03803	4.7e-07	2.2e-06
Amuc_1659	227.349	-1.12664	0.224002	-5.02961	4.91e-07	2.29e-06
Amuc_0793	2981.73	-0.75142	0.149506	-5.02601	5.01e-07	2.33e-06
Amuc_0556	442.307	-0.837844	0.166787	-5.02344	5.08e-07	2.36e-06
Amuc_1240	4959.7	0.543408	0.108227	5.021	5.14e-07	2.38e-06
Amuc_1585	3640.36	1.15909	0.230999	5.01772	5.23e-07	2.42e-06
Amuc_1996	520.48	1.11133	0.221646	5.01398	5.33e-07	2.46e-06
Amuc_1462	1819.98	-1.25614	0.250654	-5.01147	5.4e-07	2.49e-06
Amuc_1230	4052.51	0.690384	0.137847	5.00832	5.49e-07	2.52e-06
Amuc_0747	854.569	-1.28553	0.256846	-5.00506	5.58e-07	2.56e-06
Amuc_1065	1324.51	-1.29854	0.259639	-5.00134	5.69e-07	2.61e-06
Amuc_1688	1590.07	-0.795678	0.159404	-4.99159	5.99e-07	2.74e-06
Amuc_1095	2091.7	-0.790523	0.158594	-4.98458	6.21e-07	2.82e-06
Amuc_1715	375.79	-1.16315	0.233331	-4.98498	6.2e-07	2.82e-06
Amuc_1773	288.173	-1.26337	0.253483	-4.98406	6.23e-07	2.83e-06
Amuc_0260	1559.07	1.42288	0.285897	4.97691	6.46e-07	2.93e-06
Amuc_1538	6450.4	1.8898	0.379909	4.97437	6.55e-07	2.96e-06
Amuc_1735	20.7571	-3.00176	0.603612	-4.97299	6.59e-07	2.97e-06
Amuc_1432	119.118	1.53852	0.309611	4.9692	6.72e-07	3.03e-06
Amuc_1145	1499.01	1.13999	0.229674	4.96351	6.92e-07	3.11e-06
Amuc_0703	4537.61	-1.60712	0.324105	-4.95866	7.1e-07	3.18e-06
Amuc_0662	1555.56	0.863654	0.174575	4.94719	7.53e-07	3.37e-06
Amuc_0891	84.4287	-1.53423	0.310341	-4.94367	7.67e-07	3.42e-06
Amuc_1489	654.156	-0.849299	0.17219	-4.93233	8.13e-07	3.62e-06
Amuc_0103	1306.92	2.13945	0.434408	4.92499	8.44e-07	3.75e-06
Amuc_1819	677.631	-1.30302	0.264694	-4.92276	8.53e-07	3.78e-06
Amuc_1551	708.749	0.632123	0.128694	4.91184	9.02e-07	3.99e-06
Amuc_0904	3437.42	-1.46614	0.29881	-4.9066	9.27e-07	4.09e-06
Amuc_0713	567.137	-1.76682	0.36194	-4.88152	1.05e-06	4.64e-06
Amuc_1512	2229.78	0.8138	0.166951	4.87448	1.09e-06	4.8e-06
Amuc_1206	12213.7	-0.921763	0.189244	-4.87077	1.11e-06	4.88e-06
Amuc_1287	981.862	-0.97116	0.199902	-4.85818	1.18e-06	5.19e-06
Amuc_0311	364.144	0.910635	0.18763	4.85335	1.21e-06	5.3e-06
Amuc_0363	311.806	-1.09969	0.226687	-4.85115	1.23e-06	5.35e-06
Amuc_0691	54503.5	1.22295	0.252185	4.84943	1.24e-06	5.39e-06
Amuc_1461	3545.58	-1.24988	0.257785	-4.84856	1.24e-06	5.4e-06
Amuc_1123	2631.32	0.620438	0.128329	4.83473	1.33e-06	5.78e-06
Amuc_0070	2302.35	-1.6529	0.342081	-4.8319	1.35e-06	5.85e-06
Amuc_0564	659.196	-0.637229	0.131899	-4.83117	1.36e-06	5.86e-06
Amuc_0839	610.713	-1.16333	0.240868	-4.82975	1.37e-06	5.89e-06
Amuc_0375	906.317	-0.827964	0.171631	-4.82409	1.41e-06	6.04e-06
Amuc_1855	691.407	-0.541779	0.112323	-4.82339	1.41e-06	6.05e-06
Amuc_1211	2004.57	0.667719	0.138717	4.81355	1.48e-06	6.35e-06
Amuc_0997	714.692	-1.61753	0.336304	-4.80972	1.51e-06	6.46e-06
Amuc_0472	1085.17	-1.05981	0.220895	-4.79782	1.6e-06	6.84e-06
Amuc_0869	265.551	-1.66988	0.348294	-4.79444	1.63e-06	6.94e-06
Amuc_2031	850.638	0.709522	0.148154	4.78908	1.68e-06	7.11e-06
Amuc_1385	569.008	0.932661	0.195565	4.76907	1.85e-06	7.84e-06
Amuc_1743	1838.93	0.973549	0.204221	4.76715	1.87e-06	7.9e-06
Amuc_2052	1336.18	-0.839124	0.176187	-4.76268	1.91e-06	8.06e-06
Amuc_1858	659.099	0.658145	0.138233	4.76114	1.93e-06	8.11e-06
Amuc_0620	2170.42	-1.19248	0.25139	-4.74355	2.1e-06	8.83e-06
Amuc_0791	4494.39	-1.15605	0.243953	-4.7388	2.15e-06	9.02e-06
Amuc_0923	374.513	0.653796	0.138037	4.73637	2.18e-06	9.11e-06
Amuc_1695	5011.92	1.8093	0.382079	4.73541	2.19e-06	9.13e-06
Amuc_0782	171.653	1.53012	0.32346	4.73047	2.24e-06	9.34e-06
Amuc_1107	3579.17	-1.43231	0.303918	-4.71282	2.44e-06	1.02e-05
Amuc_0015	7938.11	-1.47617	0.313444	-4.70952	2.48e-06	1.03e-05
Amuc_0330	997.333	1.29421	0.275592	4.69612	2.65e-06	1.1e-05
Amuc_1509	807.608	-1.03526	0.22054	-4.69423	2.68e-06	1.11e-05
Amuc_1129	4836.74	-0.752061	0.160366	-4.68964	2.74e-06	1.13e-05
Amuc_1519	2314.05	0.603024	0.128874	4.67919	2.88e-06	1.19e-05
Amuc_1619	525.159	0.700168	0.149708	4.67689	2.91e-06	1.2e-05
Amuc_0705	6669.87	-1.27109	0.272026	-4.67268	2.97e-06	1.22e-05
Amuc_1738	1715.68	-0.628432	0.134719	-4.66476	3.09e-06	1.27e-05
Amuc_1982	198.183	1.29993	0.278724	4.66387	3.1e-06	1.27e-05
Amuc_1936	8731.89	1.70638	0.366286	4.65862	3.18e-06	1.3e-05
Amuc_0616	760.971	2.10338	0.451763	4.65594	3.23e-06	1.31e-05
Amuc_1681	548.393	0.880273	0.189829	4.63719	3.53e-06	1.44e-05
Amuc_0265	1482.95	-0.717842	0.155802	-4.60739	4.08e-06	1.65e-05
Amuc_2149	1519.36	-0.850218	0.184715	-4.60285	4.17e-06	1.69e-05
Amuc_2110	834.222	-1.17132	0.254713	-4.59861	4.25e-06	1.72e-05
Amuc_0576	10055	0.968997	0.210773	4.59734	4.28e-06	1.73e-05
Amuc_1529	937.04	2.10036	0.457341	4.59255	4.38e-06	1.76e-05
Amuc_1104	643.313	-0.912292	0.19885	-4.58784	4.48e-06	1.8e-05
Amuc_0651	700.198	0.913435	0.199158	4.58648	4.51e-06	1.81e-05
Amuc_0542	1805.42	-0.77914	0.170334	-4.57419	4.78e-06	1.91e-05
Amuc_0377	851.364	1.39008	0.304112	4.57095	4.86e-06	1.94e-05
Amuc_1891	4910.65	-1.91025	0.418045	-4.56949	4.89e-06	1.95e-05
Amuc_0413	923.632	-0.726867	0.159087	-4.569	4.9e-06	1.95e-05
Amuc_0935	3756.36	-1.30078	0.285266	-4.55989	5.12e-06	2.03e-05
Amuc_1941	2957.03	-1.86027	0.40843	-4.55468	5.25e-06	2.08e-05
Amuc_0127	3302.9	1.17074	0.257107	4.55351	5.28e-06	2.09e-05
Amuc_0269	1037.76	-0.674799	0.148249	-4.55179	5.32e-06	2.1e-05
Amuc_0621	112.985	-1.1922	0.2622	-4.54692	5.44e-06	2.15e-05
Amuc_0734	1193.29	1.94547	0.427886	4.54669	5.45e-06	2.15e-05
Amuc_2075	992.161	-0.533776	0.117411	-4.54621	5.46e-06	2.15e-05
Amuc_2045	440.381	1.67968	0.369857	4.54144	5.59e-06	2.19e-05
Amuc_1742	581.434	0.936085	0.206682	4.52911	5.92e-06	2.32e-05
Amuc_0484	1097.27	-1.5557	0.34378	-4.52527	6.03e-06	2.36e-05
Amuc_R0053	276.163	-1.69014	0.373905	-4.52024	6.18e-06	2.41e-05
Amuc_0669	2130.43	0.795237	0.176091	4.51607	6.3e-06	2.45e-05
Amuc_1148	81.7141	1.38239	0.307067	4.5019	6.73e-06	2.62e-05
Amuc_1530	584.589	1.34844	0.299769	4.49826	6.85e-06	2.66e-05
Amuc_0335	2455.5	-0.597197	0.132883	-4.49414	6.99e-06	2.7e-05
Amuc_0047	542.873	-1.32293	0.294418	-4.49337	7.01e-06	2.7e-05
Amuc_0229	2185.27	-0.878287	0.195463	-4.49336	7.01e-06	2.7e-05
Amuc_1111	4980.88	-0.834315	0.186397	-4.47602	7.6e-06	2.93e-05
Amuc_0157	1652.45	-1.12054	0.250727	-4.46916	7.85e-06	3.02e-05
Amuc_0378	839.631	1.36123	0.304953	4.46375	8.05e-06	3.08e-05
Amuc_1524	1301.58	0.599628	0.134331	4.46382	8.05e-06	3.08e-05
Amuc_2039	2365.51	-1.1187	0.251054	-4.456	8.35e-06	3.19e-05
Amuc_0977	1000.24	-0.529123	0.118794	-4.45411	8.42e-06	3.21e-05
Amuc_1558	1273.35	-1.0325	0.231914	-4.45206	8.51e-06	3.24e-05
Amuc_1144	4192.49	1.70744	0.384214	4.44397	8.83e-06	3.36e-05
Amuc_1052	4729.38	-1.82646	0.411103	-4.44282	8.88e-06	3.37e-05
Amuc_0093	1831.89	-1.38332	0.311733	-4.4375	9.1e-06	3.44e-05
Amuc_1750	342.756	-1.52293	0.343213	-4.43728	9.11e-06	3.44e-05
Amuc_1832	4776.81	0.87201	0.197194	4.42208	9.78e-06	3.69e-05
Amuc_0391	771.137	-0.729102	0.165098	-4.41618	1e-05	3.78e-05
Amuc_0590	5661.84	0.490531	0.111131	4.41397	1.01e-05	3.82e-05
Amuc_0753	1285.97	0.903223	0.205003	4.4059	1.05e-05	3.95e-05
Amuc_1587	710.071	-0.577546	0.131118	-4.40478	1.06e-05	3.97e-05
Amuc_0319	1757.22	-1.03711	0.235626	-4.40151	1.08e-05	4.02e-05
Amuc_0355	977.441	1.39745	0.317624	4.39969	1.08e-05	4.05e-05
Amuc_0519	1577.43	-0.488754	0.111152	-4.39718	1.1e-05	4.09e-05
Amuc_1830	2234.64	0.951819	0.216747	4.39138	1.13e-05	4.19e-05
Amuc_1658	3347.5	-1.15423	0.262943	-4.38967	1.14e-05	4.21e-05
Amuc_2077	3759.25	1.16214	0.264752	4.38956	1.14e-05	4.21e-05
Amuc_1958	195.311	2.14406	0.488816	4.38624	1.15e-05	4.27e-05
Amuc_0400	471.88	-0.818039	0.18677	-4.37993	1.19e-05	4.39e-05
Amuc_0475	1078.91	-0.539244	0.123178	-4.37774	1.2e-05	4.42e-05
Amuc_0164	3220.13	0.979452	0.223817	4.37613	1.21e-05	4.45e-05
Amuc_1633	1854.79	-0.959811	0.21936	-4.3755	1.21e-05	4.45e-05
Amuc_1916	70.7045	-1.50297	0.34418	-4.36681	1.26e-05	4.63e-05
Amuc_0658	5138.24	0.510131	0.116958	4.36165	1.29e-05	4.72e-05
Amuc_0781	156.777	1.95311	0.447788	4.36168	1.29e-05	4.72e-05
Amuc_1829	2498.6	0.714397	0.164053	4.35467	1.33e-05	4.86e-05
Amuc_1767	1012.42	-0.646534	0.148545	-4.35245	1.35e-05	4.91e-05
Amuc_1118	2614.46	-0.910583	0.209339	-4.3498	1.36e-05	4.95e-05
Amuc_1197	749.36	-0.992115	0.228097	-4.34953	1.36e-05	4.95e-05
Amuc_0842	365.978	-1.22817	0.283497	-4.33224	1.48e-05	5.35e-05
Amuc_0761	501.749	-1.22975	0.28431	-4.32539	1.52e-05	5.51e-05
Amuc_0644	1763.89	-0.832443	0.192749	-4.3188	1.57e-05	5.67e-05
Amuc_0410	333.013	0.556774	0.129096	4.31288	1.61e-05	5.81e-05
Amuc_1987	813.489	0.845357	0.196037	4.31223	1.62e-05	5.82e-05
Amuc_1826	576.098	-1.2213	0.283273	-4.31139	1.62e-05	5.83e-05
Amuc_2009	1167.35	0.876868	0.203532	4.30826	1.65e-05	5.9e-05
Amuc_2178	1614.05	-1.2671	0.294501	-4.30253	1.69e-05	6.05e-05
Amuc_0403	1630.69	-0.863094	0.201806	-4.27685	1.9e-05	6.78e-05
Amuc_2042	4302.16	-1.30096	0.304231	-4.27624	1.9e-05	6.78e-05
Amuc_0467	1183.38	0.430954	0.10084	4.27363	1.92e-05	6.85e-05
Amuc_1751	5531.5	1.2938	0.303376	4.26469	2e-05	7.12e-05
Amuc_1492	449.517	1.11777	0.262175	4.26344	2.01e-05	7.15e-05
Amuc_1853	1563.22	0.862425	0.202539	4.25807	2.06e-05	7.31e-05
Amuc_0227	1060.68	-1.80496	0.425076	-4.24621	2.17e-05	7.7e-05
Amuc_1269	3201.87	-0.738609	0.174249	-4.23881	2.25e-05	7.94e-05
Amuc_0831	576.168	2.42566	0.572594	4.23626	2.27e-05	8.02e-05
Amuc_1322	553.16	-1.13251	0.267606	-4.23199	2.32e-05	8.16e-05
Amuc_1191	751.138	-0.784279	0.185407	-4.23005	2.34e-05	8.21e-05
Amuc_0646	290.287	1.42438	0.336811	4.22901	2.35e-05	8.24e-05
Amuc_1525	2477.78	0.880284	0.208224	4.22759	2.36e-05	8.28e-05
Amuc_1910	806.423	0.941682	0.223776	4.20814	2.57e-05	9.01e-05
Amuc_1132	647.849	-0.598557	0.142363	-4.20445	2.62e-05	9.13e-05
Amuc_1816	1463.73	1.81802	0.432408	4.2044	2.62e-05	9.13e-05
Amuc_0390	422.614	-1.23261	0.293293	-4.20264	2.64e-05	9.18e-05
Amuc_1840	4349.37	0.798719	0.190142	4.20063	2.66e-05	9.25e-05
Amuc_0351	1966.02	-0.661143	0.157718	-4.19193	2.77e-05	9.58e-05
Amuc_1653	966.912	-1.17655	0.280659	-4.1921	2.76e-05	9.58e-05
Amuc_0512	1915.78	0.533983	0.127468	4.18915	2.8e-05	9.68e-05
Amuc_0478	11665.1	1.98394	0.473731	4.18792	2.82e-05	9.72e-05
Amuc_0752	234.871	-1.02428	0.244625	-4.18713	2.83e-05	9.74e-05
Amuc_1429	252.118	-1.27957	0.306022	-4.18131	2.9e-05	9.97e-05
Amuc_0245	4094.92	-0.914791	0.219117	-4.17491	2.98e-05	0.000102
Amuc_0051	1993.04	-0.58825	0.140953	-4.17336	3e-05	0.000103
Amuc_1224	1152.63	-0.824275	0.197541	-4.17267	3.01e-05	0.000103
Amuc_1470	450.62	0.452102	0.108362	4.17216	3.02e-05	0.000103
Amuc_1644	625.4	0.537808	0.128985	4.16954	3.05e-05	0.000104
Amuc_1407	7577.75	1.08403	0.261062	4.15239	3.29e-05	0.000112
Amuc_0441	1060.42	0.731343	0.176667	4.13967	3.48e-05	0.000118
Amuc_0748	1220.08	-0.984321	0.238082	-4.13438	3.56e-05	0.000121
Amuc_1772	1008.17	-1.28646	0.311309	-4.13241	3.59e-05	0.000122
Amuc_1897	3501.73	-0.603476	0.146153	-4.12906	3.64e-05	0.000123
Amuc_1758	453.535	1.80222	0.436558	4.12824	3.66e-05	0.000124
Amuc_0180	2228.76	-0.656755	0.159554	-4.11621	3.85e-05	0.00013
Amuc_1141	1860.2	1.29809	0.315433	4.11525	3.87e-05	0.00013
Amuc_2011	2294.33	-0.877932	0.213431	-4.11341	3.9e-05	0.000131
Amuc_0915	4306.61	-0.86137	0.209584	-4.1099	3.96e-05	0.000133
Amuc_0076	321.954	-0.800373	0.194767	-4.10939	3.97e-05	0.000133
Amuc_1007	553.519	0.754979	0.184029	4.10251	4.09e-05	0.000137
Amuc_0281	4135.17	0.610687	0.149359	4.08871	4.34e-05	0.000145
Amuc_0365	1025.58	-0.791531	0.193798	-4.0843	4.42e-05	0.000148
Amuc_1998	4758.19	-1.13517	0.278183	-4.08067	4.49e-05	0.00015
Amuc_0309	7350.96	-0.678233	0.166246	-4.0797	4.51e-05	0.00015
Amuc_1678	137.504	1.0967	0.269146	4.07474	4.61e-05	0.000153
Amuc_1281	644.899	-1.57542	0.387448	-4.06616	4.78e-05	0.000159
Amuc_0024	161.427	-1.02447	0.252072	-4.06419	4.82e-05	0.00016
EBG00001268369	18.2663	-2.01021	0.494955	-4.0614	4.88e-05	0.000161
Amuc_1142	3500.13	1.21777	0.301137	4.0439	5.26e-05	0.000174
Amuc_0958	639.844	-0.705848	0.174602	-4.0426	5.29e-05	0.000174
Amuc_1130	22.0785	-1.94029	0.479989	-4.04237	5.29e-05	0.000174
Amuc_1460	9185.53	-0.746482	0.184727	-4.041	5.32e-05	0.000175
Amuc_1469	285.133	1.0278	0.254411	4.0399	5.35e-05	0.000175
Amuc_1441	402.061	-0.932983	0.231202	-4.03536	5.45e-05	0.000179
Amuc_0587	2236.5	-0.566145	0.140475	-4.03022	5.57e-05	0.000182
Amuc_0918	1448.77	-0.714427	0.177266	-4.03026	5.57e-05	0.000182
Amuc_0933	4019.4	-1.31557	0.326503	-4.02927	5.59e-05	0.000182
Amuc_0213	2026.31	-1.30555	0.324263	-4.02622	5.67e-05	0.000184
Amuc_1544	256.341	-0.828451	0.205876	-4.02404	5.72e-05	0.000186
Amuc_0955	7694.33	1.41311	0.351981	4.01473	5.95e-05	0.000193
Amuc_0636	364.388	-1.37803	0.343573	-4.01088	6.05e-05	0.000196
Amuc_0656	4434.31	0.482914	0.120841	3.99628	6.43e-05	0.000208
Amuc_2151	912.273	-1.00246	0.251257	-3.98978	6.61e-05	0.000214
Amuc_0357	375.78	-1.09236	0.273911	-3.98801	6.66e-05	0.000215
Amuc_1963	158.31	-1.23166	0.310108	-3.97173	7.14e-05	0.00023
Amuc_1193	1037.06	-0.672595	0.169598	-3.96583	7.31e-05	0.000235
Amuc_0354	833.067	-0.883626	0.222919	-3.9639	7.37e-05	0.000237
Amuc_2168	2927.13	0.656644	0.165693	3.96303	7.4e-05	0.000237
Amuc_0096	3947.93	0.854535	0.215749	3.96078	7.47e-05	0.000239
Amuc_1623	1814	-0.618413	0.156446	-3.95289	7.72e-05	0.000247
Amuc_0741	375.648	1.6318	0.413287	3.94835	7.87e-05	0.000251
Amuc_1565	6661.63	1.94337	0.492501	3.94591	7.95e-05	0.000253
Amuc_1765	1356.21	-1.36536	0.347257	-3.93184	8.43e-05	0.000268
Amuc_0884	1577.95	-0.485067	0.123768	-3.91916	8.89e-05	0.000282
Amuc_0022	336.276	1.01807	0.260149	3.9134	9.1e-05	0.000289
Amuc_1428	1654.2	1.0033	0.256401	3.91303	9.11e-05	0.000289
Amuc_0414	1034.87	-0.597225	0.15269	-3.91135	9.18e-05	0.00029
Amuc_0649	2866.14	0.862338	0.220496	3.91091	9.2e-05	0.00029
Amuc_1757	1779.32	0.465749	0.119623	3.89348	9.88e-05	0.000312
Amuc_2054	450.274	-1.86973	0.480279	-3.89301	9.9e-05	0.000312
Amuc_0432	316.546	-1.01212	0.260658	-3.88293	0.000103	0.000324
Amuc_0192	570.382	-0.663238	0.17132	-3.87135	0.000108	0.00034
Amuc_1999	1903.63	-1.24633	0.322685	-3.86238	0.000112	0.000352
Amuc_1383	7212.84	-1.07377	0.278272	-3.8587	0.000114	0.000357
Amuc_1487	2049.41	-0.863996	0.224063	-3.85603	0.000115	0.00036
Amuc_1580	1195.39	-1.44782	0.376015	-3.85042	0.000118	0.000368
Amuc_R0041	185.39	0.617123	0.160307	3.84963	0.000118	0.000369
Amuc_R0044	123.044	1.10562	0.287693	3.84306	0.000122	0.000378
Amuc_0971	1917.37	-0.876793	0.229164	-3.82604	0.00013	0.000404
Amuc_1964	3279.31	-1.55892	0.408364	-3.81747	0.000135	0.000418
Amuc_0672	490.964	-1.0255	0.269174	-3.8098	0.000139	0.000431
Amuc_0271	1537.01	-1.06463	0.279682	-3.80657	0.000141	0.000436
Amuc_0895	2164.14	0.729432	0.192254	3.7941	0.000148	0.000458
Amuc_1208	1973.57	-1.17718	0.310716	-3.78859	0.000152	0.000467
Amuc_0117	1952.06	-0.879431	0.232152	-3.78817	0.000152	0.000467
Amuc_1834	693.032	1.56786	0.415474	3.77366	0.000161	0.000495
Amuc_0991	170.575	1.08597	0.288099	3.76944	0.000164	0.000502
Amuc_1423	1414.91	0.64734	0.171824	3.76745	0.000165	0.000506
Amuc_0347	2196.77	-0.731617	0.194868	-3.75443	0.000174	0.000532
Amuc_0553	405.214	-1.03952	0.277121	-3.75113	0.000176	0.000538
Amuc_0500	608.833	-0.687302	0.183682	-3.7418	0.000183	0.000558
Amuc_1424	965.215	0.932077	0.249158	3.74091	0.000183	0.000559
Amuc_0573	2922.15	-1.60663	0.429694	-3.73901	0.000185	0.000562
Amuc_0610	3035.5	-0.572764	0.153438	-3.73286	0.000189	0.000575
Amuc_0321	109.578	1.22549	0.328516	3.73037	0.000191	0.00058
Amuc_1431	1011.91	-0.699495	0.187648	-3.72769	0.000193	0.000586
Amuc_0625	4619.22	1.04434	0.280276	3.72613	0.000194	0.000588
Amuc_0582	313.872	1.62399	0.436726	3.71855	0.0002	0.000605
Amuc_0849	1667.42	-0.896945	0.241503	-3.71401	0.000204	0.000616
Amuc_1762	2591.8	-0.671971	0.181149	-3.7095	0.000208	0.000626
Amuc_0661	3706.43	0.603463	0.163107	3.69979	0.000216	0.000649
Amuc_1704	5217.23	0.597791	0.161611	3.69895	0.000216	0.00065
Amuc_0404	791.096	-0.693201	0.187436	-3.69834	0.000217	0.000651
Amuc_1490	478.768	-0.783697	0.212092	-3.69507	0.00022	0.000659
Amuc_0847	1438.82	0.510461	0.138256	3.69214	0.000222	0.000665
Amuc_0824	15188.2	0.747925	0.203069	3.68311	0.00023	0.000688
Amuc_1085	347.946	-1.48952	0.404735	-3.68025	0.000233	0.000695
Amuc_2093	635.496	-0.875462	0.237953	-3.67914	0.000234	0.000697
Amuc_1789	1047.4	0.640648	0.174221	3.67721	0.000236	0.000701
Amuc_1890	508.016	-0.913022	0.248461	-3.67471	0.000238	0.000707
Amuc_0608	1118.43	-0.491281	0.133721	-3.67393	0.000239	0.000708
Amuc_0796	507.756	-0.663115	0.180714	-3.66942	0.000243	0.00072
Amuc_0211	470.138	-0.475693	0.129751	-3.6662	0.000246	0.000728
Amuc_1267	1171.87	-0.672804	0.183889	-3.65875	0.000253	0.000749
Amuc_1167	448.974	1.11234	0.305592	3.63994	0.000273	0.000803
Amuc_2133	20784.2	1.28948	0.354247	3.64005	0.000273	0.000803
Amuc_0871	4151.73	0.808194	0.222103	3.63882	0.000274	0.000806
Amuc_1768	754.252	-0.647338	0.178309	-3.63042	0.000283	0.000831
Amuc_1992	959.005	-1.08986	0.300563	-3.62607	0.000288	0.000844
EBG00001268337	26.9122	-2.72899	0.754089	-3.61892	0.000296	0.000867
Amuc_0276	1026.49	-0.833012	0.230324	-3.6167	0.000298	0.000873
Amuc_0714	2419.17	0.848685	0.235008	3.6113	0.000305	0.00089
Amuc_2143	186.64	-1.35453	0.375284	-3.60936	0.000307	0.000895
Amuc_0998	32547.8	0.661246	0.183235	3.60873	0.000308	0.000896
Amuc_1559	337.643	-1.09676	0.303963	-3.60821	0.000308	0.000897
Amuc_0379	1220.77	0.608357	0.168705	3.60604	0.000311	0.000903
Amuc_0653	4238.55	0.501082	0.139025	3.60425	0.000313	0.000908
Amuc_0154	1510.84	-0.45212	0.125582	-3.60019	0.000318	0.000921
Amuc_1900	355.089	1.62127	0.450729	3.59699	0.000322	0.000931
Amuc_0194	2370.55	-0.461079	0.128286	-3.59416	0.000325	0.00094
Amuc_0228	519.335	-0.956908	0.266273	-3.59372	0.000326	0.00094
Amuc_1033	862.124	0.783646	0.218412	3.58792	0.000333	0.00096
Amuc_1693	12140.4	1.42779	0.398688	3.58123	0.000342	0.000984
Amuc_1694	2933.83	1.44988	0.405273	3.57753	0.000347	0.000997
Amuc_2154	779.549	1.48584	0.41543	3.57663	0.000348	0.000999
Amuc_R0012	321.707	-1.5744	0.440327	-3.57552	0.00035	0.001002
Amuc_1942	1992.09	-0.65008	0.181948	-3.57289	0.000353	0.00101
Amuc_1097	975.06	-0.849084	0.238279	-3.56341	0.000366	0.001046
Amuc_0155	7780.95	-0.725673	0.203749	-3.5616	0.000369	0.001052
Amuc_2026	3543.15	-0.863781	0.242654	-3.55973	0.000371	0.001058
Amuc_0254	866.725	-0.806999	0.226857	-3.55731	0.000375	0.001066
Amuc_1255	323.705	-1.09277	0.308045	-3.54743	0.000389	0.001106
Amuc_1082	176.382	-1.06934	0.301763	-3.54364	0.000395	0.00112
Amuc_0249	126.079	-1.51581	0.428171	-3.54019	0.0004	0.001133
Amuc_1811	622.782	-0.969341	0.274129	-3.53608	0.000406	0.00115
Amuc_1972	605.965	-1.27768	0.361553	-3.53386	0.00041	0.001158
Amuc_1096	3532.08	-0.487028	0.137929	-3.53101	0.000414	0.001168
Amuc_1570	493.889	-0.57675	0.163349	-3.53077	0.000414	0.001168
Amuc_1223	966.708	-0.473168	0.134074	-3.52915	0.000417	0.001174
Amuc_0779	391.899	1.77683	0.503619	3.52812	0.000419	0.001177
Amuc_0557	2685.78	-1.45335	0.412542	-3.5229	0.000427	0.001199
Amuc_0730	14029.5	1.43159	0.40728	3.515	0.00044	0.001233
Amuc_1917	601.509	-0.482281	0.137712	-3.5021	0.000462	0.001293
Amuc_0952	5611.36	0.655312	0.187503	3.49493	0.000474	0.001326
Amuc_0638	377.972	-0.921507	0.263715	-3.49433	0.000475	0.001327
Amuc_2104	3880.71	-0.85818	0.245954	-3.48918	0.000485	0.001351
Amuc_R0047	214.254	-1.77108	0.508007	-3.48634	0.00049	0.001364
Amuc_1365	383.574	0.752072	0.215808	3.48492	0.000492	0.00137
Amuc_0152	3618.73	-0.630951	0.181515	-3.47603	0.000509	0.001412
Amuc_0673	6212.31	-1.24145	0.357137	-3.4761	0.000509	0.001412
Amuc_0339	1866.93	-0.482987	0.139041	-3.47369	0.000513	0.001423
Amuc_1451	436.105	0.821867	0.237143	3.46571	0.000529	0.001464
Amuc_0080	3358.71	-0.934131	0.270425	-3.45431	0.000552	0.001525
Amuc_1353	132.775	1.92544	0.557607	3.45304	0.000554	0.00153
Amuc_1020	339.326	1.21488	0.352153	3.44988	0.000561	0.001546
Amuc_0549	406.294	-0.660726	0.192414	-3.43388	0.000595	0.001638
Amuc_0492	1104.6	0.406026	0.118342	3.43095	0.000601	0.001654
Amuc_0659	3340.12	0.57596	0.167922	3.42993	0.000604	0.001655
Amuc_0906	8087.78	1.182	0.344645	3.42962	0.000604	0.001655
Amuc_2150	807.834	-1.16778	0.340446	-3.43016	0.000603	0.001655
Amuc_1901	1810.85	1.57463	0.46146	3.41227	0.000644	0.001762
Amuc_0412	36.6308	-1.71184	0.50178	-3.41153	0.000646	0.001765
Amuc_0623	238.146	-1.05047	0.308048	-3.4101	0.000649	0.001772
Amuc_0652	5852.45	0.419456	0.123146	3.40618	0.000659	0.001795
Amuc_1231	445.405	1.01243	0.297503	3.40311	0.000666	0.001813
Amuc_1022	936.181	-0.621176	0.182634	-3.4012	0.000671	0.001823
Amuc_1121	799.656	-0.433727	0.127542	-3.40066	0.000672	0.001824
Amuc_1028	1552.74	-0.555865	0.164202	-3.38525	0.000711	0.001928
Amuc_1500	1994.65	-0.666716	0.197254	-3.37999	0.000725	0.001962
Amuc_1501	3207.14	-0.888625	0.263034	-3.37836	0.000729	0.001971
Amuc_1777	13422.6	0.954547	0.282954	3.37351	0.000742	0.002004
Amuc_0223	1633.95	-1.00891	0.299368	-3.37014	0.000751	0.002021
Amuc_0362	1946.38	0.611428	0.18141	3.37042	0.000751	0.002021
Amuc_1563	536.514	-0.89765	0.26635	-3.37019	0.000751	0.002021
Amuc_2141	2034.94	0.691583	0.205334	3.36809	0.000757	0.002033
Amuc_2047	295.147	-0.49281	0.146429	-3.36552	0.000764	0.00205
Amuc_0953	4546.88	0.630962	0.187715	3.36127	0.000776	0.002079
Amuc_0948	4180.07	0.618343	0.184304	3.35502	0.000794	0.002124
Amuc_0034	2706.57	-0.918437	0.273875	-3.35349	0.000798	0.002133
Amuc_0445	1708.41	-1.268	0.378638	-3.34885	0.000811	0.002166
Amuc_1486	820.888	0.590569	0.176826	3.33983	0.000838	0.002235
Amuc_2048	1312.14	0.677362	0.20346	3.32922	0.000871	0.002319
Amuc_0416	10345.8	-1.15523	0.347053	-3.32867	0.000873	0.00232
Amuc_0941	546.252	-0.651002	0.195804	-3.32477	0.000885	0.00235
Amuc_1723	1620.05	1.33328	0.4011	3.32406	0.000887	0.002353
Amuc_1650	5973.44	-1.12009	0.337396	-3.31982	0.000901	0.002386
Amuc_0361	3677.05	-0.578467	0.174342	-3.31801	0.000907	0.002399
Amuc_0137	1302.41	-1.28506	0.387434	-3.31685	0.00091	0.002406
Amuc_0428	5738.89	-0.667235	0.201346	-3.31388	0.00092	0.002428
Amuc_0642	402.589	-0.833952	0.251775	-3.31229	0.000925	0.002439
Amuc_0016	76739	0.885591	0.267799	3.30692	0.000943	0.002483
Amuc_0262	116.509	1.12684	0.340929	3.3052	0.000949	0.002495
EBG00001268370	434.646	0.971985	0.294111	3.30482	0.00095	0.002496
Amuc_0450	317.551	1.15563	0.350199	3.29994	0.000967	0.002533
Amuc_1217	968.755	1.30583	0.395711	3.29995	0.000967	0.002533
Amuc_0554	635.4	-0.766523	0.232553	-3.29612	0.00098	0.002565
Amuc_0426	1018.29	-1.0969	0.33302	-3.2938	0.000988	0.002583
Amuc_1282	21511.7	0.813445	0.2473	3.28931	0.001004	0.002621
Amuc_1965	2851.58	-1.33663	0.40668	-3.2867	0.001014	0.002642
Amuc_0380	1590.78	-0.576171	0.175568	-3.28175	0.001032	0.00268
Amuc_0523	4991.77	-0.830084	0.252998	-3.28099	0.001034	0.00268
Amuc_0909	605.112	1.28771	0.392422	3.28145	0.001033	0.00268
Amuc_1235	4831.86	-1.21665	0.370767	-3.28144	0.001033	0.00268
Amuc_2103	4014.78	-0.919191	0.280162	-3.28092	0.001035	0.00268
Amuc_1549	440.956	-1.00005	0.304953	-3.27935	0.00104	0.002692
Amuc_1026	1089.58	-0.529965	0.162006	-3.27127	0.001071	0.002767
Amuc_1227	522.29	0.673798	0.206196	3.26775	0.001084	0.002798
Amuc_0131	445.362	0.70534	0.215935	3.26645	0.001089	0.002807
Amuc_0116	2343.78	-0.615486	0.188507	-3.26506	0.001094	0.002818
Amuc_0986	1205.99	0.73138	0.224025	3.26472	0.001096	0.002818
Amuc_2105	649.352	-0.826142	0.253573	-3.25801	0.001122	0.002882
Amuc_0266	3980.59	-1.06149	0.32605	-3.25561	0.001132	0.002902
Amuc_1014	78.544	1.44518	0.443943	3.25533	0.001133	0.002902
Amuc_2094	731.621	-0.747658	0.229882	-3.25235	0.001145	0.002929
Amuc_2058	768.03	0.708784	0.21812	3.24951	0.001156	0.002955
Amuc_0437	8942.34	-1.28517	0.395869	-3.24644	0.001169	0.002983
Amuc_0425	1069.89	-1.16312	0.358394	-3.24538	0.001173	0.002991
Amuc_1309	13202.8	-0.635048	0.195862	-3.24232	0.001186	0.003016
Amuc_R0010	51.7744	-1.51765	0.468035	-3.2426	0.001184	0.003016
Amuc_1820	659.57	0.671201	0.207367	3.23678	0.001209	0.003071
Amuc_0996	1691.2	-0.768062	0.237468	-3.23439	0.001219	0.003093
Amuc_0570	389.878	-0.874311	0.270429	-3.23306	0.001225	0.003102
Amuc_0899	618.638	-0.676514	0.209261	-3.23288	0.001226	0.003102
Amuc_0189	7053.8	-0.889927	0.27554	-3.22976	0.001239	0.003132
Amuc_0836	77466.4	1.48453	0.460628	3.22284	0.001269	0.003205
EBG00001268329	10.5959	2.42434	0.754489	3.21322	0.001313	0.00331
Amuc_0464	841.496	0.429126	0.133839	3.20629	0.001345	0.003383
Amuc_1266	674.29	0.545325	0.170078	3.20631	0.001344	0.003383
Amuc_0840	2050.01	-1.44136	0.4503	-3.2009	0.00137	0.003443
Amuc_0499	654.491	-0.562717	0.175983	-3.19757	0.001386	0.003479
Amuc_2152	2122.08	1.40175	0.438598	3.19598	0.001394	0.003494
Amuc_0578	2431.26	-0.383584	0.120567	-3.1815	0.001465	0.003669
Amuc_0453	180.125	0.641588	0.201864	3.17832	0.001481	0.003705
Amuc_0247	30244	-1.28197	0.404151	-3.172	0.001514	0.003782
Amuc_0739	2216.64	1.26365	0.398931	3.16758	0.001537	0.003831
Amuc_1046	3867.42	-1.35502	0.427756	-3.16774	0.001536	0.003831
Amuc_1122	1543.73	0.855141	0.270332	3.1633	0.00156	0.003883
Amuc_1514	2647.42	0.648978	0.205492	3.15816	0.001588	0.003948
Amuc_0109	125.669	-0.90468	0.286675	-3.15577	0.001601	0.003971
Amuc_1971	527.96	-1.13259	0.35889	-3.15581	0.001601	0.003971
Amuc_0678	1826.85	0.450861	0.142898	3.15512	0.001604	0.003975
Amuc_1784	590.168	-0.68951	0.218569	-3.15466	0.001607	0.003976
Amuc_1683	1091.18	0.616139	0.195387	3.15343	0.001614	0.003989
Amuc_0333	726.008	0.7934	0.251944	3.14911	0.001638	0.004043
Amuc_1618	1337.61	-0.614494	0.195591	-3.14173	0.00168	0.004142
Amuc_1937	303.033	-1.17589	0.375129	-3.13463	0.001721	0.004238
Amuc_0113	721.729	-0.562982	0.179636	-3.13402	0.001724	0.004242
Amuc_1904	1006.52	1.44596	0.462959	3.1233	0.001788	0.004395
Amuc_0912	188.102	0.69778	0.223702	3.11923	0.001813	0.004451
Amuc_0337	1313.72	-0.558933	0.179444	-3.1148	0.001841	0.004513
Amuc_0760	236.876	-1.0709	0.343886	-3.11411	0.001845	0.004518
Amuc_1442	433.126	-0.53972	0.173596	-3.10906	0.001877	0.004591
Amuc_1838	363.828	0.895142	0.288383	3.104	0.001909	0.004665
Amuc_1050	3470.98	-0.606711	0.195714	-3.09999	0.001935	0.004723
Amuc_0385	1892.61	0.878645	0.283633	3.09783	0.001949	0.004752
Amuc_0571	340.599	-0.813299	0.262774	-3.09504	0.001968	0.004791
Amuc_0907	189.053	1.09138	0.352726	3.09414	0.001974	0.0048
Amuc_1872	545.603	-1.25786	0.406982	-3.09071	0.001997	0.00485
Amuc_0110	585.8	-0.908763	0.294703	-3.08366	0.002045	0.004961
Amuc_0310	806.939	-0.904514	0.293466	-3.08217	0.002055	0.00498
Amuc_0641	142.806	-0.848121	0.275475	-3.07875	0.002079	0.005032
Amuc_0448	4505.87	0.43937	0.142769	3.0775	0.002087	0.005047
Amuc_1861	473.973	-0.596123	0.19386	-3.07502	0.002105	0.005084
Amuc_1201	33.1506	-1.47364	0.479354	-3.07423	0.00211	0.005091
Amuc_0810	1100.38	-0.702632	0.228734	-3.07183	0.002128	0.005127
Amuc_0792	5263.72	-1.08938	0.354818	-3.07026	0.002139	0.005144
Amuc_2021	264.333	-0.800387	0.2607	-3.07015	0.00214	0.005144
Amuc_1488	1161.77	-0.672538	0.219528	-3.06356	0.002187	0.005252
Amuc_0477	4093.95	1.08796	0.355288	3.06218	0.002197	0.005267
Amuc_1330	336.836	0.66195	0.216181	3.06202	0.002199	0.005267
Amuc_1596	1644.47	-0.40857	0.133461	-3.06134	0.002203	0.005273
Amuc_1867	1581.17	-0.657497	0.21614	-3.04199	0.00235	0.005618
Amuc_0027	1700.19	-0.536408	0.176548	-3.03831	0.002379	0.005681
Amuc_1635	2066.53	0.492265	0.162139	3.03607	0.002397	0.005717
Amuc_0474	1536.98	-0.666957	0.219766	-3.03485	0.002407	0.005733
Amuc_1109	547.088	-0.409863	0.135355	-3.02806	0.002461	0.005857
Amuc_0584	3237.33	1.36306	0.450505	3.02562	0.002481	0.005898
Amuc_2062	127.639	1.00577	0.332985	3.02048	0.002524	0.005992
Amuc_0126	5561.02	0.353032	0.117161	3.01323	0.002585	0.00613
Amuc_0866	11401.3	0.602367	0.200124	3.00997	0.002613	0.00619
Amuc_0468	13131.5	0.834512	0.277752	3.00453	0.00266	0.006294
Amuc_2059	178.265	0.864738	0.288056	3.00198	0.002682	0.00634
Amuc_0383	11589.9	1.15218	0.38457	2.99601	0.002735	0.006458
Amuc_2091	410.458	-0.910175	0.304116	-2.99285	0.002764	0.006518
Amuc_0033	331.837	-1.20315	0.402481	-2.98933	0.002796	0.006586
Amuc_1036	3024.37	-1.37675	0.461379	-2.98399	0.002845	0.006695
Amuc_1589	4693.22	-0.959988	0.322429	-2.97737	0.002907	0.006834
Amuc_1590	1036.39	-0.562144	0.189353	-2.96877	0.00299	0.00702
Amuc_1397	2492.45	-1.39011	0.46902	-2.96386	0.003038	0.007125
Amuc_0827	3966.54	0.958208	0.323397	2.96295	0.003047	0.007138
Amuc_0299	8099.73	-0.868531	0.293723	-2.95697	0.003107	0.007262
Amuc_1137	179.457	-1.31098	0.44332	-2.95718	0.003105	0.007262
Amuc_0939	604.546	-0.497768	0.168537	-2.95347	0.003142	0.007337
Amuc_0446	4222.42	0.51511	0.174481	2.95223	0.003155	0.007358
Amuc_0115	603.851	1.25713	0.426328	2.94874	0.003191	0.007425
Amuc_1621	1755.45	0.825915	0.280062	2.94904	0.003188	0.007425
Amuc_1125	4423.18	0.672366	0.228088	2.94784	0.0032	0.00743
Amuc_1915	1301.37	-0.955946	0.324279	-2.94791	0.003199	0.00743
Amuc_1062	185.753	-0.712413	0.241928	-2.94473	0.003232	0.007493
Amuc_1990	1458.2	-0.814827	0.276722	-2.94457	0.003234	0.007493
Amuc_0013	13.2104	-1.28189	0.43637	-2.93763	0.003307	0.007654
Amuc_1919	478.065	-0.399264	0.135945	-2.93696	0.003314	0.007662
Amuc_1994	837.603	-0.559234	0.190576	-2.93444	0.003342	0.007716
Amuc_R0003	140.4	-1.51788	0.517697	-2.93198	0.003368	0.007769
Amuc_2076	3850.65	-0.412594	0.141244	-2.92115	0.003487	0.008036
Amuc_0567	452.331	1.45699	0.499526	2.91674	0.003537	0.008132
Amuc_1794	547.083	0.859495	0.294644	2.91707	0.003533	0.008132
Amuc_0973	2085.16	0.382362	0.131275	2.91269	0.003583	0.00823
Amuc_0735	7554.53	0.965837	0.3322	2.9074	0.003644	0.008361
Amuc_0961	3627.25	1.19875	0.412913	2.90316	0.003694	0.008466
Amuc_1753	1531.76	0.689044	0.237456	2.90178	0.00371	0.008494
Amuc_1245	944.006	-0.266101	0.091803	-2.89861	0.003748	0.008571
Amuc_R0021	30.4576	-0.959474	0.331072	-2.89808	0.003755	0.008576
Amuc_2160	652.523	0.517038	0.178975	2.88889	0.003866	0.008821
Amuc_0462	503.963	0.505851	0.175171	2.88776	0.00388	0.008843
Amuc_1887	897.44	-0.895283	0.310589	-2.88253	0.003945	0.008982
Amuc_0798	4193.65	-0.858885	0.298077	-2.88142	0.003959	0.009004
Amuc_0314	149.962	0.671158	0.233182	2.87825	0.003999	0.009085
Amuc_0233	3621.65	0.331316	0.115154	2.87715	0.004013	0.009103
Amuc_0482	534.843	0.588407	0.204525	2.87694	0.004015	0.009103
Amuc_1437	1789.59	1.06904	0.372087	2.87309	0.004065	0.009205
Amuc_2092	371.231	-0.637505	0.222084	-2.87056	0.004097	0.009269
Amuc_1070	486.774	0.947056	0.329993	2.86993	0.004106	0.009277
Amuc_1781	23529.2	0.942614	0.329203	2.86332	0.004192	0.009463
Amuc_1311	23386.6	0.608485	0.212914	2.85789	0.004265	0.009606
Amuc_2053	724.739	-1.6498	0.577252	-2.85803	0.004263	0.009606
Amuc_1205	6004.82	-1.22123	0.427476	-2.85684	0.004279	0.009627
Amuc_0850	1009.77	-1.03689	0.363429	-2.85307	0.00433	0.009722
Amuc_1548	377.006	-0.694706	0.24348	-2.85323	0.004328	0.009722
Amuc_0555	1082.52	-0.552062	0.19392	-2.84686	0.004415	0.009903
Amuc_0387	1463.85	-1.03853	0.365388	-2.84227	0.004479	0.010036
Amuc_1507	6099.58	0.637412	0.224477	2.83954	0.004518	0.010111
Amuc_1808	377.534	0.902978	0.318263	2.83721	0.004551	0.010175
Amuc_1338	136.35	1.28716	0.454481	2.83216	0.004623	0.010325
Amuc_1787	1287.89	0.474424	0.167847	2.82652	0.004706	0.010498
Amuc_0284	1563.09	-0.682527	0.241893	-2.82161	0.004778	0.010649
Amuc_1737	1582.21	-0.620112	0.220453	-2.8129	0.00491	0.01093
Amuc_1776	6044.55	0.858497	0.30541	2.81096	0.004939	0.010984
Amuc_2177	17543.2	-0.813546	0.289979	-2.80554	0.005023	0.011159
Amuc_2088	490.394	-1.1544	0.411581	-2.8048	0.005035	0.011173
Amuc_0210	6349.16	-1.38422	0.49397	-2.80223	0.005075	0.011251
Amuc_1847	437.693	-0.545518	0.194793	-2.80049	0.005102	0.011288
Amuc_1973	422.122	-0.947947	0.338479	-2.80061	0.005101	0.011288
Amuc_2118	1153.95	-0.395636	0.141469	-2.79664	0.005164	0.011411
Amuc_0417	1410.2	-0.956637	0.34245	-2.79351	0.005214	0.011498
Amuc_1031	2219.75	-0.475929	0.170364	-2.7936	0.005213	0.011498
Amuc_1445	310.219	-0.653801	0.234128	-2.7925	0.00523	0.011522
Amuc_0052	4967.48	0.323841	0.116039	2.7908	0.005258	0.011571
Amuc_1523	1083.99	0.343909	0.123419	2.78652	0.005328	0.011712
Amuc_0128	2394.52	-1.1062	0.397261	-2.78457	0.00536	0.011747
Amuc_1801	695.03	1.035	0.371688	2.78458	0.00536	0.011747
Amuc_1849	53.5234	-1.40669	0.505175	-2.78455	0.00536	0.011747
Amuc_1702	201.577	1.06865	0.38407	2.78243	0.005395	0.011811
Amuc_1609	1970.54	0.794298	0.285658	2.78059	0.005426	0.011866
Amuc_2146	1195.04	-0.803272	0.289698	-2.77279	0.005558	0.012142
Amuc_1272	1563.74	-0.312304	0.112712	-2.77081	0.005592	0.012203
Amuc_2090	940.634	-0.891812	0.321908	-2.77039	0.005599	0.012206
Amuc_0366	3609.26	-0.407524	0.147337	-2.76593	0.005676	0.012362
Amuc_0978	706.286	-0.322172	0.116513	-2.76512	0.00569	0.01238
Amuc_0692	2888.37	0.577392	0.20928	2.75894	0.005799	0.012603
Amuc_1209	326.224	0.680273	0.246678	2.75773	0.00582	0.012637
Amuc_0880	394.891	-0.768344	0.279663	-2.7474	0.006007	0.013029
Amuc_1075	1252.42	-0.667564	0.243019	-2.74696	0.006015	0.013033
Amuc_1734	29.7081	-1.50995	0.549775	-2.74648	0.006024	0.013038
Amuc_2125	2052.03	-1.11857	0.407491	-2.74501	0.006051	0.013083
Amuc_0471	474.512	-0.510665	0.186197	-2.74261	0.006095	0.013166
Amuc_1969	1987.25	-0.445032	0.162544	-2.73791	0.006183	0.013342
Amuc_1138	217.569	0.907332	0.331468	2.73732	0.006194	0.013352
Amuc_0067	1181.75	0.255784	0.093664	2.73086	0.006317	0.013603
Amuc_1778	2570.76	0.865138	0.316899	2.73001	0.006333	0.013624
Amuc_1940	3235.38	-0.790705	0.290372	-2.72307	0.006468	0.013899
Amuc_1780	6537.88	0.81205	0.298787	2.71782	0.006571	0.014107
Amuc_1228	3479.29	0.743949	0.273957	2.71557	0.006616	0.014189
Amuc_0930	6815.53	-1.0549	0.389137	-2.71088	0.006711	0.014377
Amuc_1465	2048.13	0.524027	0.193392	2.70966	0.006735	0.014415
Amuc_0530	5514.97	-0.845744	0.312338	-2.70778	0.006773	0.014482
Amuc_1244	1343.73	0.689689	0.254912	2.70559	0.006818	0.014563
Amuc_1640	785.269	0.571379	0.211264	2.70458	0.006839	0.014593
Amuc_1503	1207.49	0.341589	0.126419	2.70203	0.006892	0.01469
Amuc_1207	7817.23	-0.575487	0.213558	-2.69476	0.007044	0.015
Amuc_0579	71.4449	0.963552	0.357777	2.69317	0.007078	0.015056
Amuc_0917	3217.27	-0.452218	0.168342	-2.68631	0.007225	0.015343
Amuc_1870	3706.21	-0.240728	0.089617	-2.68619	0.007227	0.015343
Amuc_0510	5143.69	0.403277	0.150326	2.68269	0.007303	0.015489
Amuc_1856	475.487	0.595478	0.22241	2.67739	0.00742	0.015721
Amuc_0349	850.986	1.12907	0.422755	2.67074	0.007568	0.016019
Amuc_0146	251.068	1.04765	0.392555	2.66879	0.007613	0.016096
Amuc_2089	799.455	-0.916471	0.344104	-2.66335	0.007737	0.016342
Amuc_1043	5211.98	-0.944424	0.354687	-2.66269	0.007752	0.016358
Amuc_0384	3563.78	-0.560154	0.210676	-2.65884	0.007841	0.016529
Amuc_0663	3399.82	-0.596008	0.224188	-2.65852	0.007848	0.016529
Amuc_1480	995.973	-1.10145	0.4151	-2.65346	0.007967	0.016762
Amuc_1873	256.1	-0.983669	0.370959	-2.65169	0.008009	0.016833
Amuc_1384	1470.1	-0.326213	0.123282	-2.64608	0.008143	0.017098
Amuc_0783	292.215	0.872995	0.330618	2.6405	0.008278	0.017352
Amuc_1866	362.22	-0.454408	0.172098	-2.64041	0.008281	0.017352
Amuc_1920	752.754	-0.477978	0.181339	-2.63582	0.008393	0.017571
Amuc_0440	341.539	-0.789802	0.300396	-2.6292	0.008559	0.017899
Amuc_0274	1003.33	0.358179	0.136532	2.62341	0.008706	0.018188
Amuc_1312	3536.06	-0.705542	0.269335	-2.61957	0.008804	0.018376
Amuc_0434	383.136	0.954932	0.36531	2.61403	0.008948	0.018658
Amuc_1146	407.371	0.739701	0.283389	2.6102	0.009049	0.01885
Amuc_1173	741.544	0.448425	0.172404	2.60101	0.009295	0.019343
Amuc_1779	1639.05	0.788366	0.303351	2.59885	0.009354	0.019446
Amuc_1572	3766.57	-0.586721	0.225963	-2.59653	0.009417	0.019558
Amuc_1788	2986.61	0.360981	0.139053	2.596	0.009432	0.01957
Amuc_2033	609.087	-0.783002	0.301989	-2.59282	0.009519	0.019732
Amuc_0541	6865.77	0.603177	0.232901	2.58984	0.009602	0.019884
Amuc_0944	999.634	-0.861067	0.332568	-2.58915	0.009621	0.019904
Amuc_R0007	77.3192	-1.42588	0.550842	-2.58855	0.009638	0.019919
Amuc_1001	169.436	0.681898	0.263613	2.58674	0.009689	0.020004
Amuc_1019	426.59	0.661064	0.256371	2.57855	0.009922	0.020445
Amuc_1928	119.387	0.897487	0.348056	2.57857	0.009921	0.020445
Amuc_0790	733.252	-0.706994	0.274638	-2.57427	0.010045	0.020668
Amuc_0881	438.802	0.337842	0.131245	2.57412	0.010049	0.020668
Amuc_1229	4191.84	0.303049	0.117842	2.57164	0.010122	0.020796
Amuc_0503	276.174	-0.351278	0.136711	-2.56949	0.010185	0.020906
Amuc_1202	703.608	-0.369125	0.143874	-2.56562	0.010299	0.02112
Amuc_1471	3438.6	-0.997409	0.389087	-2.56346	0.010363	0.021231
Amuc_0942	471.016	-0.779287	0.305002	-2.55502	0.010618	0.021732
Amuc_0821	1645.27	0.871826	0.34133	2.55421	0.010643	0.021761
Amuc_0479	427.17	1.56875	0.61444	2.55314	0.010676	0.021807
Amuc_0851	190.349	-0.967719	0.379194	-2.55204	0.010709	0.021855
Amuc_0931	3982.07	-0.979203	0.383809	-2.55128	0.010733	0.021881
Amuc_0787	2928.67	0.998976	0.391727	2.55018	0.010767	0.021929
Amuc_1404	609.003	0.507822	0.200552	2.53212	0.011338	0.023069
Amuc_1183	1420.16	-1.18286	0.467555	-2.52988	0.01141	0.023195
Amuc_0943	507.998	-0.803964	0.318009	-2.52812	0.011468	0.023289
Amuc_2087	580.39	-1.00493	0.397859	-2.52585	0.011542	0.023417
Amuc_1152	306.726	1.16568	0.461933	2.52349	0.01162	0.023553
Amuc_0224	724.513	-0.689717	0.274012	-2.5171	0.011832	0.023961
Amuc_1648	2671.11	-1.06937	0.424921	-2.51663	0.011848	0.02397
Amuc_1534	1951.01	0.856717	0.340665	2.51484	0.011909	0.024069
Amuc_0065	3850.03	-0.585216	0.232792	-2.5139	0.01194	0.02411
Amuc_0382	11191.8	-0.760653	0.302855	-2.51161	0.012018	0.024243
Amuc_0548	3179.2	0.538401	0.214552	2.50942	0.012093	0.024371
Amuc_0368	1988.11	1.39438	0.555878	2.50842	0.012127	0.024398
Amuc_2063	50.9816	0.890748	0.355112	2.50836	0.012129	0.024398
Amuc_0442	765.261	0.510936	0.204063	2.50382	0.012286	0.024667
Amuc_1775	3812.76	1.23938	0.495	2.5038	0.012287	0.024667
Amuc_1550	61.6414	-1.46043	0.583797	-2.5016	0.012363	0.024798
Amuc_2138	3464.33	-0.558788	0.223517	-2.49998	0.01242	0.024887
Amuc_1978	477.391	0.293122	0.117282	2.4993	0.012444	0.024912
Amuc_0674	9458.55	-1.01277	0.406223	-2.49314	0.012662	0.025301
Amuc_0874	3255.98	-1.07089	0.429538	-2.49313	0.012662	0.025301
Amuc_0398	940.026	-0.488027	0.196067	-2.48908	0.012807	0.02555
Amuc_0864	563.751	-0.832212	0.334361	-2.48896	0.012812	0.02555
Amuc_0593	3929.23	-0.3217	0.129581	-2.48262	0.013042	0.025985
Amuc_0190	1071.13	-0.630561	0.25416	-2.48096	0.013103	0.026082
Amuc_1310	9666.06	-0.395563	0.159764	-2.47592	0.01329	0.026428
Amuc_0529	918.401	-0.470149	0.189951	-2.47511	0.01332	0.026439
Amuc_0709	5423.1	-0.558652	0.225691	-2.4753	0.013312	0.026439
Amuc_0834	847.157	-1.49046	0.603205	-2.47091	0.013477	0.026726
Amuc_1443	4197.8	0.730128	0.295561	2.47031	0.0135	0.026745
Amuc_0107	186.687	-1.30759	0.529618	-2.46892	0.013552	0.026824
Amuc_0758	1052.29	-1.05628	0.428405	-2.46562	0.013678	0.027047
Amuc_0893	793.758	0.595247	0.241518	2.46461	0.013716	0.027098
Amuc_0544	9041.44	0.51893	0.210877	2.46082	0.013862	0.027348
Amuc_1954	325.453	-0.472255	0.191923	-2.46064	0.013869	0.027348
Amuc_0237	967.221	0.825054	0.336676	2.45059	0.014262	0.028098
Amuc_1402	2145.59	-1.10937	0.453128	-2.44826	0.014355	0.028254
Amuc_0648	956.376	-0.623978	0.255013	-2.44685	0.014411	0.028338
Amuc_0905	3236.98	1.23107	0.504277	2.44126	0.014636	0.028753
Amuc_1918	2766.11	-0.898028	0.370051	-2.42677	0.015234	0.0299
Amuc_1634	1490.26	-0.493558	0.203854	-2.42114	0.015472	0.030339
Amuc_1698	690.296	0.292795	0.121471	2.41041	0.015935	0.031217
Amuc_R0045	402.546	-0.84523	0.350871	-2.40895	0.015999	0.031313
Amuc_0575	1193.69	-0.6103	0.253406	-2.40839	0.016023	0.031332
Amuc_1720	878.832	0.274722	0.114096	2.4078	0.016049	0.031353
Amuc_2124	1769.22	-0.305378	0.126861	-2.40718	0.016076	0.031378
Amuc_1617	1913.42	-0.394167	0.163907	-2.40482	0.01618	0.031552
Amuc_1902	7034.18	-0.860167	0.359695	-2.39138	0.016785	0.032701
Amuc_0962	2250.24	0.959623	0.401375	2.39084	0.01681	0.03271
Amuc_1361	2799.61	0.581321	0.24317	2.39059	0.016821	0.03271
Amuc_1863	2664.87	0.701509	0.294182	2.38461	0.017097	0.033216
Amuc_1663	215.617	0.863151	0.362276	2.38258	0.017192	0.03337
Amuc_0215	1428.92	0.717876	0.301551	2.38061	0.017284	0.033518
Amuc_0755	892.242	0.49183	0.206631	2.38023	0.017302	0.033522
Amuc_1401	1906.28	-1.08283	0.455007	-2.37981	0.017321	0.033528
Amuc_1452	2985.39	-0.43211	0.181843	-2.37628	0.017488	0.03382
Amuc_1271	180.491	-1.07355	0.452707	-2.3714	0.017721	0.034238
Amuc_1545	47.8768	-1.1378	0.480395	-2.36847	0.017862	0.034448
Amuc_2073	15.2215	1.9014	0.802785	2.3685	0.01786	0.034448
Amuc_0841	2367.97	-0.656914	0.277429	-2.36786	0.017891	0.034473
Amuc_0334	5206.35	-0.349709	0.14793	-2.36402	0.018078	0.034801
Amuc_1560	2019.63	-0.672732	0.284769	-2.36238	0.018158	0.034923
Amuc_0774	233.472	-0.380717	0.161261	-2.36088	0.018231	0.035
Amuc_1706	183.133	-0.893888	0.378601	-2.36103	0.018224	0.035
Amuc_1739	401.306	-0.586387	0.248498	-2.35973	0.018288	0.035077
Amuc_0809	3192.3	-0.889265	0.377006	-2.35875	0.018336	0.035124
Amuc_1682	410.493	0.57009	0.241711	2.35856	0.018346	0.035124
Amuc_0513	6103.16	-0.591132	0.25101	-2.35501	0.018522	0.035429
Amuc_1977	1052.05	-0.470803	0.200003	-2.35398	0.018574	0.035496
Amuc_2161	1663.25	-0.618165	0.263105	-2.3495	0.018799	0.035893
Amuc_1862	2081.62	-0.204576	0.087123	-2.34813	0.018868	0.035992
Amuc_1449	568.06	-0.487383	0.207662	-2.34701	0.018925	0.036069
Amuc_1400	493.786	-1.07819	0.459491	-2.34648	0.018952	0.036087
Amuc_1412	8726.84	0.510757	0.217709	2.34606	0.018973	0.036095
Amuc_1285	7578.55	-0.887031	0.378862	-2.34131	0.019216	0.036525
Amuc_0859	3259.23	-1.02681	0.441968	-2.32327	0.020165	0.038293
Amuc_1874	428.311	-1.03287	0.444889	-2.32165	0.020252	0.038424
Amuc_0147	32485.9	0.851425	0.36693	2.3204	0.020319	0.038517
Amuc_1911	1375.69	0.817492	0.352519	2.319	0.020395	0.038626
Amuc_0581	2526.57	-0.834493	0.360114	-2.3173	0.020487	0.038766
Amuc_0196	1612.65	0.285734	0.12345	2.31457	0.020636	0.039013
Amuc_0964	414.928	0.655628	0.283357	2.31379	0.020679	0.039024
Amuc_1875	506.552	-1.05894	0.457653	-2.31385	0.020676	0.039024
Amuc_0679	1573.92	-0.245978	0.106411	-2.31157	0.020801	0.039219
Amuc_1871	289.878	-0.418275	0.18099	-2.31104	0.020831	0.039239
Amuc_1225	4696.61	-0.292167	0.126463	-2.3103	0.020872	0.039251
Amuc_1898	500.296	-0.393913	0.170506	-2.31026	0.020874	0.039251
Amuc_1080	390.232	-0.335191	0.145135	-2.30951	0.020915	0.039293
Amuc_1333	8426.47	0.479545	0.207828	2.30742	0.021032	0.039476
Amuc_1399	9006.79	-1.03501	0.448754	-2.30641	0.021088	0.039546
Amuc_0168	777.878	-1.10749	0.481357	-2.30076	0.021405	0.040107
Amuc_0028	59.4368	-1.18889	0.516954	-2.29981	0.021459	0.040172
Amuc_1396	3688.86	-1.20143	0.524829	-2.28918	0.022069	0.041277
Amuc_0811	2072.69	0.39585	0.173112	2.28667	0.022215	0.041513
Amuc_0887	3534.53	-0.338036	0.147922	-2.28523	0.022299	0.041633
Amuc_1699	247.526	-0.436021	0.190891	-2.28414	0.022363	0.04171
Amuc_1821	350.655	-0.718905	0.314777	-2.28386	0.02238	0.04171
Amuc_2159	1904.41	0.372121	0.162999	2.28297	0.022432	0.04177
Amuc_1991	444.859	-0.620144	0.271683	-2.2826	0.022454	0.041774
Amuc_1041	17190.5	-0.582139	0.255149	-2.28156	0.022515	0.041851
Amuc_0927	3956.43	-1.06232	0.466171	-2.27883	0.022677	0.042115
Amuc_0732	194.107	0.948445	0.416263	2.27848	0.022698	0.042117
Amuc_0689	2838.8	0.357433	0.156942	2.27748	0.022758	0.04219
Amuc_2051	4566.57	0.846662	0.371847	2.27691	0.022792	0.042216
Amuc_0171	423.116	-0.474256	0.20835	-2.27625	0.022831	0.042251
Amuc_0562	4692.58	-0.725056	0.319357	-2.27036	0.023186	0.04287
Amuc_0862	2364.02	-0.85534	0.37829	-2.26107	0.023755	0.043884
Amuc_1986	672.448	0.578167	0.255828	2.25998	0.023822	0.04397
Amuc_0135	966.119	0.469075	0.207831	2.257	0.024008	0.044274
Amuc_1055	2701.67	-0.50134	0.222427	-2.25395	0.024199	0.044588
Amuc_1726	1255.41	-0.582561	0.258651	-2.2523	0.024303	0.04474
Amuc_0287	826.612	-0.313847	0.139424	-2.25103	0.024384	0.044849
Amuc_2061	246.232	0.541956	0.241113	2.24772	0.024594	0.045196
Amuc_0456	2320.72	1.05539	0.470429	2.24347	0.024867	0.045658
Amuc_1968	152.066	0.974092	0.435724	2.23557	0.02538	0.046559
Amuc_0031	3967.05	-0.316562	0.141668	-2.23454	0.025448	0.046643
Amuc_0727	13.7415	1.96904	0.882131	2.23214	0.025606	0.046892
Amuc_1440	1502.86	-0.288056	0.129197	-2.22959	0.025775	0.047141
Amuc_1709	69.305	-0.724515	0.32498	-2.22941	0.025787	0.047141
Amuc_1025	2782.49	-0.49336	0.222448	-2.21786	0.026564	0.04852
Amuc_2102	2842.63	0.449144	0.20262	2.21668	0.026645	0.048626
Amuc_0071	1242.43	0.353435	0.160005	2.20889	0.027182	0.049563
Amuc_0422	3363.67	-0.903538	0.409454	-2.20669	0.027336	0.0498
Amuc_0106	3053.23	-0.518307	0.235223	-2.20347	0.027562	0.050168
Amuc_0312	343.473	0.562409	0.256371	2.19373	0.028255	0.051368
Amuc_0386	399.493	-0.887534	0.404615	-2.19352	0.02827	0.051368
Amuc_1455	404.963	0.834548	0.380621	2.19259	0.028337	0.051446
Amuc_1555	1729.43	-0.628279	0.286623	-2.192	0.028379	0.051479
Amuc_0405	4389.98	0.453319	0.207135	2.18852	0.028632	0.051892
Amuc_1578	153.818	-0.379657	0.173625	-2.18665	0.028768	0.052095
Amuc_1408	33686.4	0.766482	0.351958	2.17776	0.029424	0.053236
Amuc_0421	4850.74	-0.83975	0.38581	-2.17659	0.029511	0.053348
Amuc_0960	156.101	-0.570964	0.263101	-2.17013	0.029997	0.05416
Amuc_1035	412.533	-0.971768	0.447833	-2.16993	0.030012	0.05416
Amuc_0232	2291.75	0.902891	0.41686	2.16593	0.030316	0.054616
Amuc_1200	856.291	0.427003	0.197136	2.16603	0.030309	0.054616
Amuc_0059	32022.2	-0.592303	0.274002	-2.16167	0.030643	0.055158
Amuc_0423	663.521	-0.85555	0.396262	-2.15905	0.030846	0.055476
Amuc_0507	2597.03	0.345902	0.160337	2.15734	0.030979	0.055667
Amuc_1018	216.381	0.470518	0.21837	2.15468	0.031187	0.055992
Amuc_0914	3498.36	0.96106	0.446505	2.1524	0.031365	0.056218
Amuc_1221	63.0793	0.720567	0.334755	2.15252	0.031356	0.056218
Amuc_0108	115.039	-1.196	0.555886	-2.15152	0.031435	0.056295
Amuc_1806	211.934	0.897156	0.41743	2.14924	0.031615	0.056569
Amuc_0178	682.022	-0.577477	0.268886	-2.14766	0.03174	0.056745
Amuc_0029	6781.28	0.296877	0.138356	2.14576	0.031892	0.056968
Amuc_0857	743.5	-0.497766	0.23227	-2.14305	0.032109	0.057307
Amuc_1084	122.172	0.865378	0.404811	2.13773	0.032538	0.058024
Amuc_0829	119.855	0.666552	0.311934	2.13684	0.032611	0.058104
Amuc_0297	4437.63	-0.692123	0.324443	-2.13327	0.032903	0.058574
Amuc_1387	896.279	-0.716402	0.336147	-2.13122	0.033071	0.058824
Amuc_0861	825.156	0.882084	0.414958	2.12572	0.033527	0.059584
Amuc_1482	1798.62	1.12207	0.528606	2.12269	0.03378	0.059983
Amuc_1194	3167.72	-0.46122	0.21845	-2.11133	0.034744	0.061643
Amuc_0637	331.457	-0.7773	0.368436	-2.10973	0.034882	0.061821
Amuc_0740	458.857	0.533018	0.252676	2.10949	0.034903	0.061821
Amuc_0012	553.125	-0.344768	0.163877	-2.10382	0.035394	0.062638
Amuc_0074	341.313	0.461168	0.219618	2.09986	0.035741	0.0632
Amuc_0956	9782.75	0.453954	0.216259	2.09912	0.035806	0.063261
Amuc_1186	361.877	-0.863319	0.411536	-2.0978	0.035923	0.063374
Amuc_1893	1105.61	-0.743022	0.354205	-2.09772	0.03593	0.063374
Amuc_0684	132.083	0.791857	0.37842	2.09253	0.036391	0.064133
Amuc_1579	470.696	-0.53342	0.255013	-2.09173	0.036462	0.064206
Amuc_0985	10041.3	0.534127	0.255401	2.09132	0.036499	0.064216
Amuc_0526	770.132	1.13028	0.541452	2.0875	0.036843	0.064768
Amuc_1417	30340.7	0.522913	0.250968	2.08359	0.037198	0.065337
Amuc_0395	1489.89	-0.288972	0.138737	-2.08288	0.037262	0.065395
Amuc_2074	66.7651	0.883533	0.424424	2.08172	0.037368	0.065526
Amuc_0660	8380.28	-0.284447	0.136717	-2.08055	0.037475	0.065659
Amuc_R0051	192.306	-0.385346	0.185524	-2.07706	0.037796	0.066166
Amuc_1113	18.9237	1.34995	0.650618	2.07487	0.037998	0.066465
Amuc_1553	36.2501	-1.03456	0.499018	-2.0732	0.038154	0.066682
Amuc_0253	659.339	0.452718	0.218845	2.06867	0.038577	0.067366
Amuc_0707	410.275	0.40201	0.194428	2.06765	0.038673	0.067477
Amuc_1676	328.264	0.698212	0.33894	2.05999	0.0394	0.068689
Amuc_1630	4757.6	-0.752798	0.365613	-2.059	0.039494	0.068796
Amuc_R0006	58.6951	-0.883014	0.429571	-2.05557	0.039824	0.069313
Amuc_0304	5310.6	-0.808655	0.394191	-2.05143	0.040225	0.069954
Amuc_1430	1215.77	-0.908079	0.44393	-2.04555	0.040801	0.070838
Amuc_R0059	37.5254	-0.860007	0.420373	-2.04582	0.040775	0.070838
Amuc_1809	384.431	0.591905	0.289676	2.04334	0.041019	0.071158
Amuc_1053	5646.85	-0.312343	0.153403	-2.0361	0.041741	0.07235
Amuc_2117	239.906	0.805486	0.396089	2.0336	0.041992	0.072727
Amuc_1626	6515.97	-0.670478	0.329999	-2.03176	0.042178	0.072989
Amuc_0983	2203.08	0.87977	0.434395	2.02527	0.042839	0.074072
Amuc_1844	26095.3	0.699756	0.346262	2.02088	0.043292	0.074793
Amuc_1836	418.689	0.326583	0.161905	2.01713	0.043682	0.075404
Amuc_0388	475.131	-0.834625	0.414284	-2.01462	0.043945	0.075796
Amuc_1321	15945.8	0.856523	0.425435	2.01329	0.044084	0.075975
Amuc_0921	343.57	-0.740007	0.367804	-2.01196	0.044224	0.076154
Amuc_1608	1197.14	0.514599	0.256055	2.00972	0.044461	0.076498
Amuc_0136	1485.82	0.629236	0.31343	2.00758	0.044688	0.076827
Amuc_0485	3068.95	-0.817123	0.407694	-2.00426	0.045042	0.077373
Amuc_1595	782.721	-0.332021	0.165945	-2.00079	0.045415	0.077943
Amuc_1944	1263.6	-0.36919	0.184551	-2.00048	0.045448	0.077943
Amuc_1081	528.113	-0.39731	0.199014	-1.9964	0.045891	0.078638
Amuc_0708	10138.2	-0.485902	0.243782	-1.99318	0.046241	0.079174
Amuc_0528	1458.41	-0.473312	0.237921	-1.98937	0.046661	0.079827
Amuc_0639	258.245	-0.633354	0.318567	-1.98813	0.046797	0.079996
Amuc_R0031	232.339	0.466552	0.235019	1.98517	0.047125	0.080491
Amuc_1320	857.145	-0.521639	0.263167	-1.98216	0.047461	0.080999
Amuc_0007	806.662	0.271597	0.137319	1.97784	0.047946	0.081761
Amuc_2145	85.2896	-0.77944	0.394894	-1.9738	0.048405	0.082476
Amuc_0872	6282.48	-0.336193	0.17065	-1.97007	0.04883	0.083134
Amuc_1953	138.45	-0.798675	0.406046	-1.96696	0.049188	0.083675
Amuc_0285	559.219	-0.336051	0.171023	-1.96495	0.04942	0.083934
Amuc_0424	1648.51	-0.810702	0.412575	-1.96498	0.049417	0.083934
Amuc_1807	379.186	0.757287	0.385561	1.96412	0.049516	0.083934
Amuc_2085	781.724	-0.752025	0.38292	-1.96392	0.049539	0.083934
Amuc_2095	548.555	0.260152	0.13243	1.96446	0.049477	0.083934
Amuc_1368	348.179	0.451204	0.229963	1.96207	0.049754	0.08423
Amuc_0112	1586.79	-0.323116	0.165173	-1.95622	0.050439	0.085321
Amuc_1331	266.489	-0.91828	0.471634	-1.94702	0.051533	0.087101
Amuc_0928	4024.8	-0.939493	0.483657	-1.94248	0.052079	0.087954
Amuc_0381	833.828	-0.36983	0.191481	-1.93142	0.053431	0.090103
Amuc_1293	134.69	1.12164	0.580749	1.93137	0.053437	0.090103
Amuc_0209	1929.11	0.258609	0.133999	1.92993	0.053615	0.09033
Amuc_1184	17046.1	-0.860984	0.448838	-1.91825	0.055079	0.092723
Amuc_1074	2638.88	0.333025	0.173651	1.91778	0.055139	0.09275
Amuc_1921	994.301	-0.323071	0.16879	-1.91404	0.055615	0.093476
Amuc_0768	10232.4	0.943757	0.493939	1.91067	0.056046	0.094126
Amuc_1170	503.692	0.587704	0.30832	1.90615	0.056631	0.095031
Amuc_0984	4402.07	0.431608	0.227325	1.89864	0.057612	0.096601
Amuc_0069	1193.34	-0.594119	0.313325	-1.89618	0.057936	0.097014
Amuc_R0013	470.093	-0.913216	0.481636	-1.89607	0.05795	0.097014
Amuc_0286	974.89	-0.248375	0.131307	-1.89156	0.05855	0.097804
Amuc_0415	4657.94	-0.333572	0.176318	-1.89187	0.058508	0.097804
Amuc_0744	7517.04	0.248809	0.131567	1.89112	0.058608	0.097804
Amuc_1190	2285.54	0.300465	0.158873	1.89123	0.058594	0.097804
Amuc_1034	651.607	0.285733	0.151436	1.88683	0.059184	0.098686
Amuc_0837	869.288	0.562623	0.298896	1.88234	0.05979	0.099597
Amuc_1466	3405.18	0.603618	0.320717	1.88209	0.059824	0.099597
Amuc_1616	1063.37	-0.349257	0.185927	-1.87846	0.060318	0.10027
Amuc_2079	2887.54	0.733563	0.390522	1.87842	0.060324	0.10027
Amuc_0886	3660.73	-0.261882	0.139652	-1.87525	0.060759	0.100876
Amuc_2012	441.922	-0.274744	0.146526	-1.87506	0.060784	0.100876
Amuc_0173	325.89	0.534657	0.285702	1.87138	0.061293	0.10164
Amuc_0207	97.432	-0.766289	0.409797	-1.86992	0.061494	0.101894
Amuc_0615	16928.2	-0.788434	0.422546	-1.86591	0.062053	0.102659
Amuc_0877	2969.3	0.262192	0.14051	1.86601	0.06204	0.102659
Amuc_0438	10277.5	-0.910944	0.488675	-1.86411	0.062306	0.102789
Amuc_1136	162.406	-0.749599	0.402121	-1.86411	0.062306	0.102789
Amuc_1178	8155	-0.392233	0.210423	-1.86402	0.062319	0.102789
Amuc_2034	4193.72	-0.56037	0.300634	-1.86396	0.062327	0.102789
Amuc_1518	771.931	-0.257486	0.138278	-1.86209	0.06259	0.103142
Amuc_0728	2313.02	-0.195288	0.106448	-1.83459	0.066567	0.109609
Amuc_0769	1010.2	0.557	0.303818	1.83333	0.066753	0.109829
Amuc_0431	5738.95	-0.405284	0.221167	-1.83248	0.06688	0.109953
Amuc_0711	1015.72	-0.700056	0.382334	-1.83101	0.0671	0.110228
Amuc_0302	1484.86	-0.658501	0.359814	-1.83012	0.067233	0.11036
Amuc_1040	25590.4	-0.38116	0.208982	-1.82389	0.068168	0.111809
Amuc_1903	10929.8	-0.653456	0.358435	-1.82308	0.068291	0.111923
Amuc_0055	743.346	-0.57288	0.315139	-1.81786	0.069085	0.113111
Amuc_2165	2317.08	0.254169	0.139837	1.81761	0.069124	0.113111
Amuc_0300	1978.11	-0.543407	0.299762	-1.81279	0.069864	0.114122
Amuc_0436	524.63	-0.405582	0.223765	-1.81254	0.069904	0.114122
Amuc_1131	322.701	-0.308964	0.170405	-1.81312	0.069813	0.114122
Amuc_0498	81.1988	-0.478048	0.26588	-1.79799	0.072179	0.117745
Amuc_1949	331.548	-0.68287	0.380224	-1.79597	0.0725	0.118177
Amuc_1323	3188.46	-0.225525	0.125639	-1.79502	0.072651	0.118332
Amuc_1023	1142.34	-0.301704	0.168187	-1.79386	0.072835	0.11854
Amuc_0922	447.289	0.406083	0.22659	1.79215	0.073109	0.118893
Amuc_1539	950.045	-0.975228	0.546848	-1.78336	0.074527	0.121107
Amuc_0473	1224.18	0.453203	0.254682	1.77948	0.075161	0.122042
Amuc_1925	147.455	-0.748968	0.420981	-1.7791	0.075223	0.12205
Amuc_2022	4820	0.813216	0.457215	1.77863	0.0753	0.12208
Amuc_R0034	5750.53	-0.808889	0.455447	-1.77604	0.075727	0.122678
Amuc_1959	104.62	0.660116	0.372199	1.77356	0.076136	0.123246
Amuc_1851	705.235	0.482744	0.272901	1.76893	0.076905	0.124395
Amuc_0218	2406.97	-0.287474	0.162738	-1.76648	0.077315	0.124963
Amuc_1536	2920.3	0.646894	0.368042	1.75766	0.078805	0.127273
Amuc_1087	3424.47	1.44915	0.824807	1.75696	0.078925	0.127368
Amuc_0221	398.191	0.972932	0.555278	1.75215	0.079747	0.128597
Amuc_2122	3048.2	-0.223581	0.127694	-1.75091	0.079961	0.128843
Amuc_1532	7455.26	0.560091	0.320852	1.74563	0.080875	0.130216
Amuc_1391	153.504	1.0449	0.600559	1.73988	0.081881	0.131735
Amuc_1415	50.5805	-0.989404	0.568832	-1.73936	0.081971	0.13178
Amuc_1561	3842.18	0.247854	0.142691	1.737	0.082388	0.132348
Amuc_1607	300.325	0.414117	0.238693	1.73494	0.082751	0.132831
Amuc_0111	4142.13	-0.272125	0.157002	-1.73326	0.083049	0.133139
Amuc_2017	814.518	0.399695	0.230618	1.73315	0.08307	0.133139
Amuc_0352	677.066	-0.25808	0.149153	-1.73031	0.083576	0.133645
Amuc_0929	2913.4	-0.807346	0.466425	-1.73092	0.083465	0.133645
Amuc_1045	3347.8	-0.777763	0.449472	-1.73039	0.08356	0.133645
Amuc_0969	4057.04	0.200486	0.115945	1.72915	0.083782	0.133874
Amuc_0169	1085.34	-0.820321	0.47663	-1.72109	0.085235	0.135886
Amuc_1556	3837.52	-0.589189	0.342331	-1.72111	0.085231	0.135886
Amuc_2167	3997.54	-0.265893	0.154478	-1.72124	0.085207	0.135886
Amuc_1943	3853.41	-0.468211	0.272596	-1.7176	0.085869	0.136793
Amuc_2158	2004.51	0.526761	0.307612	1.71242	0.086819	0.138202
Amuc_1717	1719.1	-0.30857	0.18059	-1.70868	0.08751	0.139196
Amuc_1614	3135.63	-0.581838	0.340842	-1.70706	0.087811	0.139569
Amuc_0723	4132.24	-0.662162	0.38816	-1.7059	0.088027	0.139807
Amuc_0736	231.958	0.577111	0.339697	1.6989	0.089338	0.141784
Amuc_2078	3520.83	0.726007	0.427543	1.69809	0.08949	0.141917
Amuc_1668	575.073	0.271583	0.160152	1.69578	0.089927	0.142503
Amuc_1677	842.166	-0.767268	0.453115	-1.69332	0.090395	0.143137
Amuc_0726	427.61	0.255809	0.151549	1.68797	0.091418	0.144553
Amuc_2064	50.5962	0.691759	0.40983	1.68792	0.091427	0.144553
Amuc_1317	3951.07	0.303909	0.180533	1.6834	0.092297	0.14582
Amuc_1641	1472.02	0.425836	0.254206	1.67516	0.093903	0.148246
Amuc_0239	49.4691	-0.891729	0.532552	-1.67445	0.094043	0.148264
Amuc_2112	6015.37	0.277245	0.16558	1.67438	0.094056	0.148264
Amuc_1761	595.27	-0.547927	0.327684	-1.67212	0.094501	0.148743
Amuc_2000	3276.87	-0.744668	0.445329	-1.67218	0.09449	0.148743
Amuc_R0042	32.5635	-0.72021	0.430976	-1.67111	0.094699	0.148944
Amuc_2144	4241.82	-0.346764	0.208072	-1.66655	0.095603	0.150254
Amuc_0162	6499.32	0.533407	0.320464	1.66448	0.096016	0.150689
Amuc_1169	739.497	0.532091	0.31968	1.66445	0.096023	0.150689
Amuc_2126	1002.1	0.482312	0.289898	1.66373	0.096167	0.150802
Amuc_1199	211.912	-0.536154	0.322694	-1.66149	0.096615	0.151392
Amuc_1236	122.451	0.342127	0.205974	1.66102	0.096709	0.151426
Amuc_1984	7578.14	0.223939	0.134955	1.65936	0.097043	0.151837
Amuc_0968	680.772	-0.352412	0.212428	-1.65897	0.097121	0.151847
Amuc_0283	285.164	-0.29834	0.180083	-1.65668	0.097583	0.152456
Amuc_2055	16550.9	0.922478	0.557035	1.65605	0.097711	0.152543
Amuc_1575	541.334	-0.220195	0.133589	-1.6483	0.099291	0.154894
Amuc_1535	3897.29	0.671034	0.409326	1.63936	0.101138	0.157658
Amuc_0094	6140.17	-0.692524	0.422789	-1.63799	0.101424	0.157987
Amuc_2096	369.13	-0.473566	0.289472	-1.63596	0.101847	0.158529
Amuc_2072	4516.61	-0.562367	0.345432	-1.62801	0.103523	0.161019
Amuc_1017	1295.57	0.551637	0.339213	1.62623	0.103902	0.161489
Amuc_1792	171.966	0.465361	0.286915	1.62195	0.104815	0.162787
Amuc_0197	41.3246	-0.663962	0.409482	-1.62147	0.104917	0.162826
Amuc_1528	1533.61	0.587434	0.362544	1.62031	0.105166	0.163092
Amuc_0543	2863.93	0.509931	0.315669	1.6154	0.106225	0.164614
Amuc_1409	15751.6	0.513254	0.317818	1.61493	0.106326	0.164649
Amuc_2157	2519.96	0.442172	0.273954	1.61404	0.106519	0.164827
Amuc_1381	2629.23	-0.517274	0.320669	-1.61311	0.10672	0.165017
Amuc_1192	1378.06	-0.404054	0.25057	-1.61254	0.106845	0.165089
Amuc_1598	226.024	-0.411482	0.255489	-1.61057	0.107274	0.16563
Amuc_0073	446.714	-0.308051	0.191761	-1.60643	0.10818	0.166906
Amuc_0303	3423.16	-0.687429	0.429413	-1.60086	0.109408	0.168564
Amuc_1505	9810.94	-0.847234	0.529246	-1.60083	0.109414	0.168564
Amuc_1114	863.749	0.485717	0.304465	1.59532	0.110642	0.17033
Amuc_1948	224.168	-0.642411	0.402945	-1.59429	0.110872	0.17056
Amuc_0577	304.761	-0.294123	0.184618	-1.59315	0.111127	0.170827
Amuc_R0005	21.3349	-0.752347	0.472658	-1.59174	0.111444	0.17119
Amuc_2097	634.858	0.364863	0.231154	1.57844	0.114465	0.175702
Amuc_0230	406.185	-0.402005	0.254899	-1.57712	0.114768	0.17604
Amuc_0056	563.654	-0.439665	0.278908	-1.57638	0.114938	0.176172
Amuc_0687	50609.6	-0.727591	0.462169	-1.57429	0.115419	0.17678
Amuc_2137	7865.25	0.613266	0.390391	1.5709	0.116205	0.177855
Amuc_1226	576.736	0.233596	0.148743	1.57047	0.116305	0.177879
Amuc_0494	110.797	0.810758	0.517531	1.56659	0.117211	0.179133
Amuc_0318	957.002	-0.336058	0.215421	-1.56	0.11876	0.181106
Amuc_0949	1679.64	0.301247	0.193088	1.56016	0.118723	0.181106
Amuc_1256	721.323	-0.552461	0.354036	-1.56047	0.11865	0.181106
Amuc_0301	9425.26	-0.584328	0.375082	-1.55787	0.119265	0.181745
Amuc_1094	1010.23	-0.350081	0.225053	-1.55554	0.119816	0.182454
Amuc_2166	3490.09	-0.227555	0.146722	-1.55093	0.120918	0.183998
Amuc_0547	2038.24	0.255083	0.164576	1.54994	0.121155	0.184226
Amuc_1447	1363.97	-0.193832	0.125107	-1.54933	0.121304	0.184318
Amuc_0870	1749.92	0.144025	0.093071	1.54748	0.121748	0.18486
Amuc_0706	561.707	0.727742	0.471555	1.54328	0.122763	0.186267
Amuc_0848	592.957	-0.606305	0.393415	-1.54113	0.123285	0.186924
Amuc_0566	34.7909	0.883407	0.574794	1.53691	0.124315	0.188351
Amuc_0261	102.335	0.792318	0.51805	1.52943	0.126159	0.191007
Amuc_1766	3915.94	-0.499917	0.328383	-1.52236	0.127919	0.193533
Amuc_0729	2472.5	0.259509	0.170945	1.51808	0.128994	0.19502
Amuc_0972	1934.29	-0.5212	0.343717	-1.51637	0.129427	0.195533
Amuc_1705	1631.89	-0.169679	0.111934	-1.51588	0.129548	0.195576
Amuc_1063	874.98	-0.189863	0.125285	-1.51545	0.129659	0.195604
Amuc_1859	836.479	0.211888	0.14039	1.50929	0.131225	0.197824
Amuc_2086	278.684	-0.610275	0.405535	-1.50486	0.132359	0.199391
Amuc_0130	237.78	0.517026	0.344658	1.50012	0.133584	0.201093
Amuc_1477	912.952	-0.35423	0.236338	-1.49883	0.133918	0.201451
Amuc_1302	40.8196	-0.870524	0.582188	-1.49526	0.134846	0.202702
Amuc_R0048	4.68075	-1.34668	0.902709	-1.49182	0.135747	0.203912
Amuc_0890	1134.67	-0.421214	0.282516	-1.49094	0.135978	0.204112
Amuc_0457	8602.44	0.229238	0.15395	1.48904	0.136477	0.204715
Amuc_0595	402.915	0.381145	0.256527	1.48579	0.137334	0.205708
Amuc_1324	227.985	-0.286147	0.192562	-1.486	0.137279	0.205708
EBG00001268363	3.57306	-3.08081	2.07515	-1.48462	0.137645	0.206027
Amuc_0199	503.213	0.517273	0.348664	1.48359	0.137919	0.206291
Amuc_1740	985.852	-0.334827	0.225886	-1.48229	0.138264	0.20666
Amuc_0700	6703.26	0.686188	0.464285	1.47795	0.139422	0.208096
Amuc_1746	1438.14	0.349032	0.236152	1.478	0.139408	0.208096
Amuc_0506	6396.72	0.137601	0.093202	1.47637	0.139843	0.208576
Amuc_1914	531.644	-0.476121	0.323653	-1.47108	0.141268	0.210553
Amuc_1712	4454.14	-0.457957	0.31159	-1.46974	0.141632	0.210945
Amuc_1756	7309.67	0.239008	0.162786	1.46823	0.142041	0.211405
Amuc_1817	239.942	-0.584131	0.399805	-1.46104	0.144005	0.214177
Amuc_2101	907.299	0.394046	0.270345	1.45757	0.144959	0.215443
Amuc_1754	2617.86	0.299634	0.205939	1.45496	0.145679	0.216361
Amuc_1876	2203.25	-0.531776	0.365696	-1.45415	0.145906	0.216546
Amuc_1645	323.03	-0.320479	0.221004	-1.45011	0.147029	0.218058
Amuc_0754	879.217	0.384834	0.265599	1.44893	0.147357	0.218391
Amuc_2030	2305.16	0.181269	0.125158	1.44832	0.147527	0.21849
Amuc_1591	3264.65	0.254517	0.176328	1.44343	0.148899	0.220367
Amuc_0373	300.779	-0.441977	0.306698	-1.44108	0.149562	0.221192
Amuc_1047	1509.96	-0.767823	0.533106	-1.44028	0.149788	0.221239
Amuc_2099	7656.84	-0.259985	0.180517	-1.44023	0.149804	0.221239
Amuc_1377	118.262	-0.609807	0.423956	-1.43837	0.150328	0.221858
Amuc_0775	1733.07	-0.412645	0.287388	-1.43585	0.151046	0.222761
Amuc_2082	2613.33	-0.637547	0.444719	-1.4336	0.151688	0.223529
EBG00001268317	11.8424	1.4219	0.992065	1.43328	0.151779	0.223529
Amuc_1892	3405.57	-0.443418	0.310056	-1.43012	0.152682	0.224701
Amuc_1416	806.367	-0.51067	0.359346	-1.42111	0.155286	0.228374
Amuc_0142	161.17	-0.423784	0.298447	-1.41997	0.155617	0.228702
Amuc_1543	5928.78	-0.513635	0.365508	-1.40526	0.159943	0.234896
Amuc_0072	1287.94	-0.264585	0.188429	-1.40416	0.16027	0.235212
Amuc_0306	17187.6	-0.609798	0.43533	-1.40077	0.161283	0.236533
Amuc_0967	2149.61	-0.661874	0.47304	-1.39919	0.161755	0.237061
Amuc_1979	8.50962	-1.27752	0.915908	-1.39481	0.163072	0.238825
Amuc_0682	2825.63	0.208298	0.149498	1.39332	0.163524	0.23932
Amuc_2113	1367.55	-0.187442	0.134657	-1.39199	0.163926	0.239742
Amuc_1067	498.241	0.177984	0.128029	1.39019	0.164471	0.240372
Amuc_0338	4038.4	-0.209508	0.150777	-1.38952	0.164674	0.240502
Amuc_0668	2021.73	0.212325	0.153157	1.38632	0.165649	0.241758
Amuc_0568	278.463	-0.441857	0.32006	-1.38054	0.167419	0.244051
Amuc_0681	2860.94	-0.193709	0.140324	-1.38044	0.167452	0.244051
EBG00001268313	3.38701	-2.48329	1.80009	-1.37954	0.167729	0.244286
Amuc_1352	92.0084	-0.790113	0.573654	-1.37733	0.16841	0.245107
Amuc_0273	480.993	-0.196493	0.142827	-1.37574	0.168902	0.245654
Amuc_0540	4674.88	-0.254959	0.185771	-1.37244	0.169928	0.246976
Amuc_1577	906.465	-0.543831	0.397672	-1.36754	0.171457	0.249027
Amuc_2080	1172.72	0.558675	0.408861	1.36642	0.171808	0.249364
Amuc_0995	191.986	0.579504	0.425213	1.36285	0.172928	0.250818
Amuc_1913	2001.25	-0.235588	0.17394	-1.35443	0.175601	0.254518
Amuc_1439	3105.51	0.273943	0.202489	1.35288	0.176094	0.255057
Amuc_1124	1681.67	0.20639	0.154474	1.33608	0.181523	0.262676
Amuc_1685	554.701	-0.390273	0.292156	-1.33584	0.181603	0.262676
Amuc_1472	11679.4	-0.485603	0.364577	-1.33196	0.182872	0.26433
Amuc_1604	2535.61	0.178206	0.133978	1.33012	0.18348	0.265027
Amuc_0536	3955.93	-0.318526	0.24091	-1.32218	0.186108	0.268638
Amuc_0718	597.029	-0.243647	0.185445	-1.31385	0.188897	0.272478
Amuc_1719	620.766	0.232461	0.177472	1.30985	0.190246	0.274235
Amuc_0217	214.599	-0.387635	0.296503	-1.30736	0.191091	0.275266
EBG00001268333	1.35697	-2.10784	1.61338	-1.30648	0.191389	0.275506
Amuc_0088	352.985	-0.327586	0.2514	-1.30304	0.192559	0.277002
Amuc_0954	44.9738	-0.601548	0.464971	-1.29373	0.195757	0.281218
Amuc_R0062	25.65	-0.527699	0.407861	-1.29382	0.195727	0.281218
Amuc_1690	498.497	0.377774	0.292187	1.29292	0.196039	0.28143
Amuc_0533	1303.66	0.578293	0.448077	1.29061	0.196839	0.282386
Amuc_0780	8.62651	0.955607	0.744453	1.28364	0.199269	0.285678
Amuc_0315	1484.54	0.337566	0.263067	1.28319	0.199424	0.285705
Amuc_1454	2740.69	0.247106	0.192919	1.28088	0.200237	0.286675
Amuc_2083	1584.47	-0.577252	0.450894	-1.28024	0.200461	0.286801
Amuc_1567	485.308	-0.501035	0.391921	-1.27841	0.201106	0.287528
Amuc_0865	5252.66	-0.534313	0.419628	-1.2733	0.202911	0.289912
Amuc_0987	561.73	0.334944	0.263502	1.27113	0.203684	0.290622
Amuc_1526	1711.88	0.27927	0.219664	1.27135	0.203603	0.290622
Amuc_1174	106.542	-0.612764	0.482739	-1.26935	0.204317	0.291329
Amuc_2135	695.087	-0.269165	0.212153	-1.26873	0.204538	0.291445
Amuc_2067	986	-0.327219	0.258279	-1.26692	0.205185	0.29217
Amuc_1168	451.885	0.275182	0.217882	1.26298	0.206595	0.293979
Amuc_0666	4790.35	-0.185322	0.146993	-1.26075	0.207398	0.294922
Amuc_1636	828.482	-0.494721	0.39449	-1.25408	0.209814	0.298157
Amuc_1015	141.338	0.514499	0.410758	1.25256	0.210366	0.29874
Amuc_1869	10916.2	0.270823	0.216699	1.24977	0.211386	0.299985
Amuc_1744	467.082	0.318114	0.256057	1.24236	0.214105	0.303639
Amuc_0463	373.381	0.354597	0.285815	1.24065	0.214735	0.303931
Amuc_1710	850.33	-0.38136	0.307393	-1.24063	0.214743	0.303931
Amuc_1733	5823.88	-0.357838	0.288403	-1.24075	0.214697	0.303931
Amuc_1304	113.547	-0.647116	0.523036	-1.23723	0.216001	0.305301
Amuc_2013	15987.7	-0.825843	0.667286	-1.23761	0.215859	0.305301
Amuc_0427	782.977	-0.357861	0.289718	-1.2352	0.216754	0.306019
Amuc_0527	2335.25	-0.355345	0.287709	-1.23508	0.2168	0.306019
Amuc_0788	1845.32	0.365442	0.296671	1.23181	0.218021	0.307537
Amuc_R0054	159.329	-0.312523	0.253792	-1.23142	0.218167	0.307537
Amuc_2049	1554.71	0.200904	0.16323	1.2308	0.218397	0.307655
Amuc_1463	1144.93	0.171624	0.139758	1.22801	0.219445	0.308925
Amuc_1804	166.368	0.476177	0.388234	1.22652	0.220002	0.309502
Amuc_0742	343.001	0.239661	0.196027	1.22259	0.221484	0.311379
Amuc_0062	124.075	0.535402	0.438898	1.21988	0.222511	0.312614
Amuc_1674	88.5688	0.397186	0.325866	1.21886	0.222897	0.312947
Amuc_0279	107.032	0.495896	0.407	1.21842	0.223065	0.312975
Amuc_0191	1041.7	-0.304524	0.250174	-1.21725	0.223509	0.313363
Amuc_0913	1155.7	0.261157	0.214607	1.21691	0.223639	0.313363
Amuc_0418	836.67	-0.162693	0.133938	-1.21469	0.224483	0.314336
Amuc_0114	1144.75	-0.224379	0.185095	-1.21224	0.225422	0.315376
Amuc_0433	311.988	0.438905	0.362227	1.21168	0.225633	0.315376
Amuc_0762	1275.02	-0.423481	0.34953	-1.21158	0.225675	0.315376
Amuc_0690	3768.84	0.1564	0.12938	1.20884	0.226724	0.316461
Amuc_0738	5437.85	0.37145	0.307296	1.20877	0.226752	0.316461
Amuc_0597	1261.8	-0.132542	0.109862	-1.20644	0.227648	0.317501
Amuc_1327	12923.5	-0.314616	0.26138	-1.20367	0.228716	0.318613
Amuc_1419	889.707	0.318143	0.264328	1.20359	0.228748	0.318613
Amuc_0807	378.17	0.232567	0.193485	1.20199	0.229367	0.319265
Amuc_1249	1439.56	-0.33108	0.275563	-1.20147	0.229569	0.319335
Amuc_2014	11398.2	-0.599805	0.50019	-1.19916	0.230468	0.320373
Amuc_2016	6949.65	-0.591966	0.494249	-1.19771	0.231031	0.320944
Amuc_0235	8697.51	-0.377397	0.316465	-1.19254	0.23305	0.323461
Amuc_1697	397.595	-0.201604	0.169091	-1.19228	0.23315	0.323461
Amuc_1239	476.994	0.196183	0.164948	1.18936	0.234297	0.324838
Amuc_1091	2747.16	0.480486	0.404429	1.18806	0.234809	0.325335
Amuc_1380	543.057	-0.336834	0.284538	-1.18379	0.236495	0.327455
Amuc_0345	490.811	-0.179759	0.152471	-1.17897	0.238411	0.329687
EBG00001268380	2.95496	-1.88812	1.60153	-1.17894	0.238421	0.329687
Amuc_0219	5319.73	0.672747	0.571762	1.17662	0.239346	0.330603
Amuc_1051	2027.83	-0.216482	0.184005	-1.1765	0.239397	0.330603
Amuc_0719	1012.63	-0.264378	0.225201	-1.17396	0.24041	0.331785
Amuc_0389	288.673	-0.215512	0.18383	-1.17235	0.241058	0.332412
Amuc_0813	214.424	0.3847	0.328231	1.17204	0.24118	0.332412
Amuc_0077	3537.68	0.341788	0.292536	1.16836	0.242661	0.334234
Amuc_0258	4384.41	0.218178	0.186813	1.1679	0.242848	0.334274
Amuc_1049	2221.24	-0.284316	0.243818	-1.1661	0.243574	0.334835
Amuc_1929	41.0685	0.665819	0.570971	1.16612	0.243567	0.334835
Amuc_0588	25.9057	-0.53258	0.457105	-1.16512	0.243972	0.335163
Amuc_1582	1064.53	0.148555	0.127663	1.16365	0.244567	0.335761
Amuc_0367	4880.54	0.59834	0.51437	1.16325	0.244729	0.335765
Amuc_0493	983.029	-0.239634	0.206687	-1.1594	0.246292	0.33769
Amuc_0671	1624.25	0.246412	0.212766	1.15814	0.246808	0.338177
Amuc_1670	254.42	0.282413	0.24448	1.15516	0.248026	0.339625
Amuc_2171	819.197	-0.267381	0.231911	-1.15295	0.248932	0.340643
Amuc_1566	418.689	0.172771	0.150522	1.14781	0.251047	0.343314
Amuc_1198	217.11	-0.344413	0.301116	-1.14379	0.252711	0.345367
Amuc_2056	2210.32	0.538853	0.471279	1.14339	0.252878	0.345371
Amuc_0720	1700.47	-0.280877	0.246019	-1.14169	0.253582	0.346108
Amuc_0537	2891.05	0.17521	0.153941	1.13816	0.255052	0.347889
Amuc_2172	336.075	-0.209669	0.184569	-1.13599	0.25596	0.348901
Amuc_0487	6416.98	0.297285	0.262026	1.13457	0.256558	0.349489
Amuc_1264	5018.79	-0.238934	0.210892	-1.13297	0.257228	0.350176
Amuc_1414	1549.58	0.197886	0.174962	1.13102	0.258045	0.351062
Amuc_R0011	168.907	-0.629833	0.557571	-1.1296	0.258644	0.35165
Amuc_1946	1419.79	-0.317425	0.282226	-1.12472	0.260708	0.354227
Amuc_1730	1976.42	-0.175133	0.155769	-1.12431	0.260881	0.354232
Amuc_0346	5080.32	0.136021	0.121268	1.12166	0.262006	0.355302
Amuc_1009	525.576	0.296206	0.264012	1.12194	0.261887	0.355302
Amuc_1058	313.524	0.292656	0.261038	1.12112	0.262235	0.355384
Amuc_1727	1281.22	0.281883	0.251857	1.11922	0.263048	0.356028
Amuc_1752	506.678	-0.202028	0.180481	-1.11939	0.262975	0.356028
Amuc_1725	788.688	0.213553	0.191047	1.1178	0.263651	0.356614
Amuc_0376	686.358	-0.460233	0.412172	-1.1166	0.264164	0.357079
Amuc_0853	113.088	-0.564928	0.507425	-1.11332	0.265569	0.358749
Amuc_1956	77.2635	-0.443457	0.399048	-1.11129	0.266444	0.3597
Amuc_0664	520.252	0.242408	0.21935	1.10512	0.269107	0.363061
Amuc_1106	5899.66	-0.131686	0.119251	-1.10427	0.269476	0.363237
Amuc_1533	2833.9	0.412584	0.373708	1.10403	0.269582	0.363237
Amuc_1797	523.092	0.339815	0.308395	1.10188	0.270513	0.364259
Amuc_0770	478.241	-0.472655	0.429417	-1.10069	0.271032	0.364724
Amuc_0486	2680.95	0.20743	0.188906	1.09806	0.272179	0.366034
Amuc_1427	1088.76	-0.194596	0.178067	-1.09283	0.27447	0.368879
Amuc_1970	6717.89	0.364564	0.335939	1.08521	0.277829	0.373156
Amuc_0064	1334.65	0.316703	0.29227	1.0836	0.278544	0.373878
Amuc_1868	5958.46	0.302828	0.279593	1.08311	0.278761	0.373931
Amuc_2015	4705.48	-0.555637	0.514219	-1.08054	0.2799	0.375219
Amuc_0008	547.92	0.142146	0.131746	1.07894	0.280615	0.375939
Amuc_1316	271.344	0.28354	0.263915	1.07436	0.282661	0.378438
Amuc_2006	227.596	0.252159	0.234873	1.0736	0.283004	0.378657
EBG00001268371	1.79208	-2.06684	1.93417	-1.06859	0.285253	0.381424
Amuc_0444	905.75	-0.16993	0.159186	-1.06749	0.285751	0.381847
Amuc_1073	436.982	-0.24531	0.230059	-1.06629	0.286292	0.382272
Amuc_1812	4768.41	0.574849	0.539268	1.06598	0.286432	0.382272
Amuc_0014	170.729	0.745094	0.700335	1.06391	0.287369	0.38312
Amuc_0778	470.743	-0.607155	0.570756	-1.06377	0.287431	0.38312
Amuc_0177	1935.81	-0.265982	0.251668	-1.05688	0.290567	0.386645
Amuc_0624	187.444	-0.255625	0.241718	-1.05753	0.290268	0.386645
Amuc_1967	647.442	-0.341841	0.323484	-1.05675	0.290626	0.386645
Amuc_1822	7018.45	-0.286329	0.27191	-1.05303	0.292328	0.388663
Amuc_1557	21253.5	-0.290639	0.276429	-1.05141	0.293072	0.389407
Amuc_1410	612.336	-0.265287	0.25275	-1.0496	0.2939	0.390261
Amuc_1042	12310.2	-0.347886	0.33197	-1.04794	0.294664	0.390782
EBG00001268368	215.708	-0.41322	0.39428	-1.04804	0.294621	0.390782
Amuc_0420	1842.54	-0.197591	0.188887	-1.04609	0.295522	0.391673
Amuc_0731	413.034	0.384566	0.368413	1.04384	0.296558	0.3928
Amuc_1329	4678.51	0.483668	0.46456	1.04113	0.297815	0.394216
Amuc_0353	1175.23	0.24319	0.233881	1.03981	0.29843	0.394783
Amuc_1303	51.4318	-0.560627	0.539852	-1.03848	0.299045	0.395148
Amuc_1406	51542	0.430501	0.414579	1.03841	0.299082	0.395148
Amuc_0677	666.835	0.188326	0.181435	1.03798	0.29928	0.395163
Amuc_1665	233.529	0.471599	0.455631	1.03505	0.300647	0.396719
Amuc_1692	2048.94	0.544804	0.529712	1.02849	0.303719	0.400521
Amuc_0596	633.997	-0.127797	0.124533	-1.02621	0.304794	0.401435
Amuc_R0032	422.106	-0.471784	0.459714	-1.02626	0.30477	0.401435
Amuc_0632	868.533	-0.2651	0.259107	-1.02313	0.306248	0.403099
Amuc_1435	944.443	0.158838	0.155663	1.0204	0.30754	0.404547
Amuc_1277	320.305	-0.278182	0.273231	-1.01812	0.308621	0.405715
Amuc_0466	3157.02	0.148674	0.146502	1.01483	0.310188	0.407521
Amuc_1204	2448.57	-0.179145	0.176622	-1.01429	0.310447	0.407606
Amuc_R0060	3.69671	-1.31404	1.29764	-1.01264	0.311233	0.408131
EBG00001268379	1.76974	-3.01481	2.97639	-1.01291	0.311103	0.408131
Amuc_1966	53.4844	-0.500423	0.496479	-1.00794	0.313481	0.410822
EBG00001268351	1.44388	-1.81637	1.80494	-1.00633	0.314255	0.411581
Amuc_1448	5068.79	0.116631	0.116238	1.00338	0.315676	0.413184
Amuc_0296	1636.35	-0.320484	0.321482	-0.9969	0.318814	0.417033
Amuc_1166	360.885	0.162427	0.163228	0.995098	0.319689	0.417691
Amuc_2134	1000.3	0.213161	0.214223	0.995046	0.319714	0.417691
Amuc_0023	111.547	0.455824	0.458941	0.993209	0.320608	0.418544
Amuc_1203	1530.19	0.202502	0.203953	0.992888	0.320765	0.418544
Amuc_0470	525.046	-0.219718	0.221744	-0.99086	0.321752	0.419572
Amuc_0374	6618.85	0.118021	0.119171	0.990355	0.322001	0.419637
Amuc_1684	11546.2	-0.383462	0.389503	-0.98449	0.324874	0.42312
Amuc_0236	865.047	-0.465776	0.47409	-0.98246	0.325872	0.424157
Amuc_2043	4654.75	-0.387373	0.394643	-0.98158	0.326307	0.424461
Amuc_1800	547.115	0.465469	0.476566	0.976714	0.328711	0.427324
EBG00001268343	2.46904	-1.65817	1.70041	-0.97516	0.329483	0.428064
Amuc_1242	1254.31	0.137122	0.140762	0.974142	0.329986	0.428271
Amuc_R0002	650.724	0.501566	0.514947	0.974015	0.330049	0.428271
Amuc_1905	464.909	0.216582	0.222558	0.973152	0.330478	0.428563
Amuc_R0052	104.997	0.25381	0.261194	0.971727	0.331186	0.429218
Amuc_1278	468.325	-0.17292	0.178697	-0.96767	0.333208	0.431572
Amuc_1654	6875.86	-0.439722	0.455829	-0.96466	0.334713	0.433255
Amuc_0268	300.647	0.175553	0.182352	0.962715	0.33569	0.434253
Amuc_2132	1652.7	-0.486859	0.506192	-0.96181	0.336147	0.434576
Amuc_2032	927.359	0.199106	0.207163	0.961108	0.336498	0.434763
Amuc_1810	298.639	0.131308	0.136912	0.959069	0.337524	0.435822
Amuc_0586	685.006	-0.133046	0.139438	-0.95415	0.340007	0.438759
Amuc_R0061	9.75694	-0.645823	0.679073	-0.95104	0.341586	0.440527
Amuc_1785	1503.16	-0.225699	0.237844	-0.94893	0.342654	0.441634
Amuc_0665	347.012	-0.175717	0.185442	-0.94756	0.343354	0.442265
Amuc_1360	60.3493	0.432898	0.457132	0.946986	0.343646	0.442371
Amuc_0630	2232.99	-0.230266	0.244119	-0.94325	0.345552	0.444552
Amuc_1270	192.693	0.239182	0.253797	0.942414	0.345981	0.444833
Amuc_0087	17.6708	-0.755518	0.802049	-0.94199	0.3462	0.444843
Amuc_0894	2278.72	0.212952	0.226189	0.941479	0.346459	0.444905
Amuc_0925	1651.07	-0.523187	0.55662	-0.93994	0.347251	0.445649
Amuc_0246	550.197	-0.239139	0.254705	-0.93889	0.34779	0.446069
Amuc_R0024	351.332	0.429639	0.458973	0.936089	0.349227	0.44764
Amuc_1286	9173.07	-0.331318	0.354345	-0.93502	0.34978	0.447802
Amuc_R0055	559.018	-0.414489	0.44329	-0.93503	0.349773	0.447802
EBG00001268334	0.951822	-2.35649	2.52138	-0.93461	0.349992	0.447802
Amuc_0650	7019.17	0.141151	0.151597	0.931096	0.351804	0.449848
Amuc_0937	4973.47	-0.180682	0.194634	-0.92832	0.353243	0.451414
Amuc_1232	818.136	-0.170816	0.184711	-0.92477	0.355084	0.453491
Amuc_1593	1095.22	-0.139392	0.150862	-0.92397	0.355501	0.453748
Amuc_0163	9050.18	0.335472	0.363976	0.921687	0.356692	0.454993
Amuc_0307	3023.2	-0.445738	0.484074	-0.9208	0.357152	0.455143
Amuc_1588	1322.4	0.153302	0.166518	0.920634	0.357242	0.455143
Amuc_0058	6009.18	-0.203343	0.221283	-0.91892	0.358135	0.455606
Amuc_0654	3277.71	-0.154106	0.167745	-0.9187	0.358255	0.455606
Amuc_1701	462.025	-0.129209	0.140618	-0.91886	0.358168	0.455606
Amuc_1664	71.1174	0.515207	0.5616	0.917392	0.358937	0.456199
Amuc_0675	754.718	-0.335544	0.36714	-0.91394	0.360748	0.458104
Amuc_1857	564.934	0.168046	0.183917	0.913706	0.360871	0.458104
Amuc_1974	13877.8	-0.299132	0.328559	-0.91044	0.362593	0.460013
Amuc_0097	2189.14	0.197723	0.218306	0.905713	0.365088	0.462899
Amuc_0993	1343.15	0.150118	0.165941	0.904647	0.365652	0.463336
Amuc_1637	1192.46	0.331926	0.369133	0.899204	0.368544	0.466719
Amuc_1210	29981.7	0.169711	0.189138	0.897285	0.369567	0.467733
Amuc_2128	14344.1	0.351379	0.3927	0.894778	0.370906	0.469146
Amuc_1708	72.5739	-0.273882	0.306755	-0.89284	0.371944	0.470177
Amuc_R0025	128.278	0.380015	0.426159	0.89172	0.372543	0.470651
Amuc_1700	1601.54	0.201867	0.228417	0.883766	0.376823	0.475773
Amuc_1347	5.79711	-0.986977	1.1258	-0.87669	0.380655	0.480323
Amuc_0820	1070.28	0.252172	0.289494	0.871079	0.383711	0.483889
Amuc_0833	311.822	-0.589063	0.676763	-0.87041	0.384075	0.484059
Amuc_1474	1510.89	-0.0922263	0.106127	-0.86901	0.384839	0.484732
Amuc_0214	1568.55	-0.465141	0.537444	-0.86547	0.386782	0.486887
Amuc_0081	211.38	0.266414	0.30822	0.864364	0.387388	0.487359
Amuc_1234	8227.36	-0.417804	0.487971	-0.85621	0.391884	0.492721
Amuc_0259	291.201	-0.263812	0.308486	-0.85518	0.39245	0.493138
Amuc_0501	1921.56	-0.21642	0.253733	-0.85294	0.39369	0.494402
Amuc_1531	3025.23	0.199627	0.234242	0.852225	0.394089	0.494608
Amuc_0815	4482.89	0.217279	0.255388	0.85078	0.394892	0.49532
EBG00001268324	8.09838	0.588665	0.696402	0.845295	0.397946	0.498854
Amuc_1126	3840.41	-0.20533	0.244223	-0.84075	0.400489	0.501742
Amuc_0222	2573.99	0.362724	0.431994	0.839652	0.401104	0.502214
Amuc_0784	52.3945	0.391434	0.466708	0.838712	0.401631	0.502576
Amuc_2081	1777.2	-0.421187	0.503408	-0.83667	0.402778	0.503677
Amuc_R0020	36.6425	-0.263125	0.314632	-0.83629	0.40299	0.503677
Amuc_1547	362.257	0.387119	0.465211	0.832135	0.405333	0.506305
Amuc_1418	10166.2	-0.122393	0.14735	-0.83063	0.406184	0.507068
Amuc_1177	3378.85	-0.507618	0.614413	-0.82618	0.4087	0.509907
Amuc_1127	2981.06	0.185343	0.224453	0.825756	0.408943	0.509907
Amuc_0773	1345.77	0.489385	0.595598	0.82167	0.411265	0.512499
Amuc_0585	6153.92	0.111164	0.136229	0.81601	0.414494	0.516218
Amuc_1222	381.203	0.214741	0.263744	0.8142	0.41553	0.517203
Amuc_1243	799.86	-0.210873	0.259661	-0.81211	0.416729	0.517777
Amuc_1319	1858.54	0.212467	0.261378	0.812875	0.41629	0.517777
Amuc_1782	1828.09	-0.270513	0.332945	-0.81249	0.416513	0.517777
Amuc_0118	1526.12	-0.259156	0.319338	-0.81154	0.417055	0.517786
Amuc_1069	3014.17	0.640326	0.789318	0.811239	0.417228	0.517786
Amuc_0148	2617.85	0.233632	0.288337	0.810275	0.417782	0.518168
Amuc_0234	14.4485	-0.571322	0.705659	-0.80963	0.418154	0.518324
Amuc_1592	24331.8	0.348252	0.430742	0.808492	0.418808	0.518829
Amuc_0873	779.843	-0.137247	0.170181	-0.80648	0.419965	0.519957
Amuc_1305	170.851	-0.396239	0.491839	-0.80563	0.420458	0.520261
Amuc_0220	11476.9	0.457825	0.569157	0.804391	0.421171	0.520837
Amuc_0685	51.7467	0.264531	0.330372	0.800705	0.423302	0.522859
Amuc_1878	34.6548	0.505597	0.631235	0.800965	0.423152	0.522859
Amuc_0856	1924.31	-0.211561	0.265939	-0.79552	0.426309	0.525956
Amuc_1610	1891.2	0.231456	0.290827	0.795856	0.426116	0.525956
Amuc_1495	1158.23	0.183655	0.231015	0.794992	0.426618	0.526029
Amuc_0676	2365.59	-0.120982	0.153043	-0.79051	0.429232	0.528943
Amuc_1995	1260.95	-0.0715236	0.090855	-0.78723	0.43115	0.530995
Amuc_1157	209.438	0.289201	0.368204	0.785436	0.432198	0.531974
Amuc_0429	55.1489	-0.283809	0.363229	-0.78135	0.434597	0.534616
Amuc_0508	6995.62	-0.0845785	0.108409	-0.78018	0.435286	0.534807
Amuc_1434	2257.16	-0.269901	0.34612	-0.77979	0.435515	0.534807
Amuc_1475	1031.23	-0.193034	0.247415	-0.7802	0.435272	0.534807
Amuc_1624	1253	-0.164802	0.211462	-0.77934	0.435777	0.534817
EBG00001268336	12.964	-0.615358	0.791103	-0.77785	0.436658	0.535587
Amuc_0443	733.062	-0.190757	0.246246	-0.77466	0.438541	0.537583
Amuc_1318	2208	0.225562	0.291911	0.772709	0.439695	0.538683
Amuc_0926	10971.4	-0.421613	0.546158	-0.77196	0.440137	0.538912
Amuc_2066	3088.08	0.119944	0.155835	0.769685	0.441487	0.54025
Amuc_1175	393.224	0.230699	0.301108	0.766168	0.443577	0.542493
Amuc_1044	11041.6	-0.354055	0.46356	-0.76377	0.445003	0.543921
Amuc_0701	450.325	0.198551	0.260132	0.763271	0.445302	0.543971
Amuc_1945	880.234	-0.121744	0.159807	-0.76182	0.446169	0.544715
Amuc_1605	1260.75	0.109519	0.144548	0.757666	0.448651	0.547427
Amuc_1079	2631.88	-0.200513	0.265422	-0.75545	0.449979	0.54873
Amuc_0360	2960.02	-0.103885	0.137723	-0.75431	0.450665	0.548931
Amuc_2164	3647.98	0.24558	0.325477	0.754523	0.450535	0.548931
Amuc_0959	849.189	-0.111585	0.148236	-0.75275	0.451598	0.549748
Amuc_0267	960.242	0.16372	0.218383	0.749691	0.453441	0.550326
Amuc_0483	340.505	-0.113798	0.151778	-0.74977	0.453396	0.550326
Amuc_0504	1740.68	0.133522	0.177925	0.75044	0.45299	0.550326
Amuc_0889	419.971	-0.226308	0.30192	-0.74956	0.453518	0.550326
Amuc_1611	5829.64	-0.213141	0.284595	-0.74893	0.453901	0.550326
Amuc_1805	70.1883	0.395045	0.52694	0.749697	0.453437	0.550326
Amuc_2127	3628.17	0.413834	0.55249	0.749034	0.453837	0.550326
Amuc_1599	2484.95	-0.311488	0.416443	-0.74797	0.454477	0.550706
Amuc_2123	1938.35	-0.15919	0.213781	-0.74464	0.45649	0.552828
Amuc_1802	668.025	0.321969	0.434429	0.74113	0.458615	0.555082
Amuc_1825	385.706	0.110638	0.150149	0.73685	0.461214	0.557907
Amuc_1328	936.424	0.343088	0.466284	0.735793	0.461857	0.558364
Amuc_0940	1115.96	-0.133053	0.181228	-0.73418	0.462841	0.559233
Amuc_0086	1410.65	-0.0825387	0.11316	-0.7294	0.46576	0.562367
Amuc_0535	3779.38	0.221226	0.30373	0.728364	0.466391	0.562367
Amuc_1165	541.594	0.145513	0.199831	0.728181	0.466503	0.562367
Amuc_2175	144.454	0.169712	0.232856	0.728828	0.466107	0.562367
Amuc_1164	1507.95	0.118005	0.162373	0.72675	0.467379	0.563101
Amuc_1300	1873.91	-0.846607	1.17337	-0.72152	0.470591	0.566646
Amuc_0049	18.0017	-0.559474	0.780104	-0.71718	0.473264	0.569214
Amuc_1764	1775.3	-0.240008	0.33455	-0.71741	0.473124	0.569214
Amuc_1938	2435.87	0.116715	0.163266	0.714875	0.474686	0.570599
Amuc_R0022	3.89534	-0.992765	1.40206	-0.70808	0.478897	0.575332
Amuc_1248	1710.66	-0.105163	0.149585	-0.70303	0.482038	0.578776
EBG00001268311	2.66072	-1.00252	1.43285	-0.69967	0.484135	0.580962
Amuc_2040	572.812	-0.137006	0.196277	-0.69803	0.48516	0.581861
Amuc_1013	139.851	0.339695	0.48745	0.696882	0.485877	0.582388
Amuc_0521	8889.21	0.384385	0.552275	0.696003	0.486427	0.582591
Amuc_0854	105.602	-0.236992	0.340639	-0.69573	0.486599	0.582591
Amuc_1147	82.0402	-0.335997	0.483355	-0.69513	0.486971	0.582705
Amuc_0888	1038.95	0.174769	0.252206	0.692962	0.488334	0.583672
Amuc_1606	2543.51	0.137571	0.19841	0.693369	0.488078	0.583672
Amuc_1379	720.382	-0.185703	0.269003	-0.69034	0.489981	0.585309
Amuc_1213	9790.26	-0.315053	0.457981	-0.68792	0.491505	0.586797
Amuc_1376	55.9089	0.429014	0.624729	0.686721	0.492259	0.587364
Amuc_0198	5804.32	-0.335658	0.490188	-0.68475	0.493499	0.588511
Amuc_0100	258.085	0.208708	0.305964	0.682132	0.495156	0.590152
Amuc_1002	58.2725	0.450317	0.66338	0.678821	0.497251	0.592314
Amuc_1877	30.2532	0.412422	0.608138	0.678172	0.497663	0.592469
Amuc_0057	1778.75	-0.142039	0.209664	-0.67746	0.498113	0.59267
Amuc_0161	1140.38	-0.100244	0.148225	-0.67629	0.498854	0.593217
Amuc_R0004	53.8322	-0.226281	0.335483	-0.67449	0.499997	0.594241
Amuc_0408	3633.11	-0.309803	0.460097	-0.67334	0.500728	0.594774
Amuc_1181	338.36	0.314138	0.468596	0.670381	0.502615	0.596678
Amuc_0974	559.96	-0.0919585	0.137908	-0.66681	0.504894	0.599046
Amuc_0003	659.573	0.184941	0.277692	0.665996	0.505414	0.599325
Amuc_1453	473.994	-0.0986753	0.149493	-0.66006	0.509213	0.60349
Amuc_1128	1121.87	-0.174256	0.264405	-0.65905	0.509862	0.60392
Amuc_0411	229.206	0.254264	0.386653	0.657603	0.510793	0.604672
Amuc_1258	3289.21	-0.234082	0.356197	-0.65717	0.511072	0.604672
Amuc_0037	7878.4	0.38302	0.595396	0.643304	0.520027	0.614899
Amuc_1760	1506.1	-0.206704	0.321525	-0.64288	0.520299	0.614899
Amuc_1646	990.329	0.108314	0.169217	0.640092	0.522113	0.616696
Amuc_1212	1598.06	-0.117214	0.183626	-0.63833	0.523258	0.617703
Amuc_0075	897.668	-0.332347	0.525924	-0.63193	0.527432	0.621933
Amuc_R0049	301.939	-0.177966	0.281554	-0.63209	0.52733	0.621933
Amuc_1247	716.095	-0.124542	0.197883	-0.62937	0.529105	0.623556
Amuc_0150	407.15	-0.210572	0.335559	-0.62752	0.530315	0.623587
Amuc_0534	8406.48	-0.215265	0.342325	-0.62883	0.529459	0.623587
Amuc_0721	4553.61	-0.167429	0.266443	-0.62839	0.529751	0.623587
Amuc_R0056	21.5806	-0.451831	0.71985	-0.62767	0.530217	0.623587
Amuc_0640	123.364	0.261229	0.417057	0.626362	0.531077	0.624134
Amuc_1064	504.726	-0.0859598	0.137637	-0.62454	0.532273	0.625147
Amuc_1632	534.502	-0.119835	0.191998	-0.62414	0.532532	0.625147
Amuc_1931	40.4066	-0.504356	0.81436	-0.61933	0.5357	0.628515
Amuc_0406	3029.72	0.110334	0.178286	0.61886	0.536009	0.628527
Amuc_0439	11279	0.35124	0.570387	0.615792	0.538032	0.630548
Amuc_2002	9558.84	0.276122	0.449972	0.613642	0.539452	0.631861
Amuc_1436	7592.04	0.0983009	0.161268	0.609549	0.542161	0.63468
Amuc_1196	726.605	-0.16702	0.275232	-0.60683	0.543962	0.636435
Amuc_0717	9244.95	0.348849	0.576053	0.605584	0.544791	0.636698
Amuc_2060	757.777	0.145103	0.239595	0.605618	0.544769	0.636698
Amuc_1691	254.273	-0.258603	0.427489	-0.60494	0.545221	0.636848
Amuc_0068	1454.09	-0.110263	0.182819	-0.60313	0.546425	0.637728
Amuc_1951	12592.5	0.268965	0.446124	0.602892	0.546581	0.637728
Amuc_1054	3292.67	-0.0878334	0.145938	-0.60185	0.547271	0.637941
Amuc_1510	768.396	-0.189636	0.315163	-0.60171	0.547369	0.637941
Amuc_0184	309.786	0.251648	0.419684	0.599613	0.548764	0.638859
Amuc_R0033	608.719	0.361811	0.602977	0.60004	0.548479	0.638859
Amuc_0308	5554.82	-0.292809	0.492539	-0.59449	0.552185	0.641733
Amuc_0399	173.642	-0.126737	0.213651	-0.59319	0.553051	0.641733
Amuc_0812	1907.28	0.137148	0.230865	0.59406	0.552472	0.641733
Amuc_0828	584.641	0.197815	0.333483	0.593181	0.55306	0.641733
Amuc_1506	4769.29	-0.353935	0.595619	-0.59423	0.552358	0.641733
Amuc_1741	2909.2	-0.104121	0.175414	-0.59357	0.552797	0.641733
Amuc_0618	186.936	0.247265	0.418788	0.590429	0.554903	0.643516
Amuc_0195	11.7915	-0.749373	1.27056	-0.5898	0.555325	0.643651
Amuc_1713	8316.77	-0.219637	0.373251	-0.58844	0.556235	0.644351
Amuc_1176	8312.45	-0.308429	0.530374	-0.58153	0.560882	0.649377
Amuc_0054	269.678	-0.128731	0.221808	-0.58037	0.561665	0.649927
Amuc_0089	1103.38	0.34809	0.601787	0.578428	0.562975	0.651085
Amuc_0613	359.177	0.144909	0.251879	0.575311	0.565081	0.653162
Amuc_0278	740.178	-0.169827	0.295889	-0.57395	0.565998	0.653863
Amuc_0583	122.847	-0.164938	0.287841	-0.57302	0.566633	0.653879
Amuc_1233	2799.55	-0.328621	0.573085	-0.57343	0.566357	0.653879
Amuc_1238	1045.86	-0.0879093	0.153743	-0.57179	0.567462	0.654477
Amuc_0737	6127.59	0.198631	0.349538	0.568268	0.569853	0.656875
Amuc_0757	2743.91	-0.197466	0.348307	-0.56693	0.570761	0.657562
Amuc_1386	662.417	-0.142335	0.252348	-0.56404	0.572725	0.659464
Amuc_0082	228.665	0.193961	0.347532	0.558109	0.57677	0.663728
Amuc_0598	2003.91	-0.112911	0.202966	-0.5563	0.578004	0.663728
Amuc_0988	1893.22	0.121335	0.217648	0.557484	0.577197	0.663728
Amuc_1280	1331.69	0.0592972	0.106503	0.556766	0.577687	0.663728
Amuc_1499	1067.85	-0.1236	0.222034	-0.55667	0.577752	0.663728
Amuc_1313	199.932	-0.20445	0.368688	-0.55454	0.579213	0.664753
Amuc_0298	5520.45	0.234396	0.426562	0.549499	0.582663	0.668348
Amuc_0407	1607.83	-0.281793	0.522057	-0.53977	0.589353	0.675655
Amuc_0814	318.424	0.282242	0.526897	0.535669	0.592187	0.678535
Amuc_0716	1148.73	0.117828	0.220179	0.535144	0.59255	0.678581
Amuc_1279	399.415	-0.0898281	0.168347	-0.53359	0.593626	0.679444
Amuc_1935	183.81	-0.193729	0.363422	-0.53307	0.593985	0.679486
Amuc_0225	587.847	-0.219223	0.414055	-0.52945	0.59649	0.681802
Amuc_2050	154.117	0.140495	0.265478	0.529213	0.596658	0.681802
Amuc_0066	1170	-0.119395	0.226107	-0.52804	0.597469	0.682358
Amuc_1860	2394.73	0.0847996	0.160992	0.526732	0.59838	0.683029
Amuc_0350	510.825	0.266065	0.512472	0.51918	0.603635	0.688655
Amuc_1306	139.991	-0.249566	0.483147	-0.51654	0.605476	0.69038
Amuc_1413	5907.06	-0.0675586	0.131098	-0.51533	0.606323	0.690972
Amuc_1089	1123.46	0.280822	0.549424	0.51112	0.609267	0.693951
Amuc_R0001	127.628	-0.236531	0.464383	-0.50934	0.610511	0.694993
Amuc_2084	956.742	-0.152429	0.302309	-0.50421	0.614111	0.698713
Amuc_1160	86.6433	-0.264291	0.526164	-0.5023	0.615458	0.699868
Amuc_1359	20.2405	-0.38517	0.770343	-0.5	0.617077	0.701329
Amuc_0702	139.004	-0.181961	0.366659	-0.49627	0.619705	0.703937
Amuc_0317	363.553	0.122979	0.248262	0.495358	0.620347	0.704287
Amuc_2098	699.735	-0.112647	0.228289	-0.49344	0.621701	0.705443
Amuc_1689	5517.58	0.125215	0.254708	0.491603	0.623	0.706536
Amuc_1315	320.691	0.15337	0.313755	0.488821	0.624969	0.708388
Amuc_0257	3544.09	0.0716031	0.1468	0.487759	0.62572	0.708858
Amuc_0476	3992.2	-0.0499256	0.102967	-0.48487	0.627767	0.71002
Amuc_0767	4804.57	0.282554	0.582407	0.485149	0.62757	0.71002
Amuc_0858	2495.75	-0.139672	0.288333	-0.48441	0.628094	0.71002
Amuc_1478	214.109	0.0924263	0.19055	0.485051	0.62764	0.71002
Amuc_0449	91.1429	0.145946	0.301669	0.483794	0.628532	0.710133
Amuc_1795	34.8394	0.199267	0.414557	0.480675	0.630748	0.712254
Amuc_1251	10897.2	-0.132184	0.277556	-0.47624	0.6339	0.715431
Amuc_0364	843.562	-0.0802037	0.16909	-0.47432	0.635268	0.716207
Amuc_2129	21702.2	0.210097	0.442889	0.474377	0.635231	0.716207
Amuc_0149	133.939	0.146696	0.309999	0.473214	0.636061	0.716717
Amuc_R0063	82.7679	-0.111855	0.23699	-0.47198	0.636941	0.717325
Amuc_0231	1336.19	-0.0947608	0.201887	-0.46937	0.638802	0.718652
Amuc_1254	1857.96	-0.172897	0.368349	-0.46938	0.638795	0.718652
Amuc_R0039	0.213478	1.47914	3.16075	0.46797	0.639806	0.719397
Amuc_1839	449.482	0.219389	0.471806	0.464999	0.641932	0.721403
Amuc_1349	91.2188	-0.228625	0.495938	-0.46099	0.644803	0.724242
Amuc_0293	5801.1	-0.150661	0.328576	-0.45853	0.646574	0.725844
Amuc_0594	1352.78	0.0935996	0.204928	0.456744	0.647855	0.726896
Amuc_0777	1129.1	-0.252374	0.553152	-0.45625	0.648213	0.726909
Amuc_0458	6297.09	0.10276	0.226012	0.454664	0.649351	0.727798
Amuc_0465	890.978	0.0717224	0.159911	0.448515	0.653782	0.732375
Amuc_2111	2746.14	0.249684	0.56037	0.44557	0.655908	0.734365
Amuc_0205	1337.32	0.101287	0.229296	0.441731	0.658684	0.737082
Amuc_0129	118.769	0.233691	0.536559	0.435536	0.663173	0.741711
Amuc_0522	7394.35	0.214397	0.493964	0.434033	0.664264	0.742538
Amuc_0251	173.242	0.17037	0.395128	0.431177	0.66634	0.74291
Amuc_0393	30.4222	0.273578	0.634369	0.43126	0.66628	0.74291
Amuc_1108	5652.24	0.20972	0.486422	0.431147	0.666361	0.74291
Amuc_1301	4289.85	-0.494063	1.14225	-0.43254	0.665352	0.74291
Amuc_1613	1547.07	-0.179342	0.414857	-0.4323	0.665526	0.74291
Amuc_1265	3966.23	-0.103233	0.242496	-0.42571	0.670318	0.746926
Amuc_0802	34.4783	0.190927	0.449943	0.424337	0.67132	0.747647
Amuc_0079	716.021	-0.141802	0.337027	-0.42074	0.673942	0.75017
EBG00001268312	2.05414	-0.923227	2.20417	-0.41886	0.675322	0.751309
Amuc_1048	76221.2	-0.190673	0.456116	-0.41804	0.67592	0.751578
Amuc_2100	3867.18	-0.106788	0.256935	-0.41562	0.677688	0.753145
Amuc_0011	2772.59	-0.0760317	0.183218	-0.41498	0.678157	0.753269
Amuc_1731	1310.12	-0.105855	0.255727	-0.41394	0.67892	0.75372
Amuc_0078	4857.1	0.0588586	0.142698	0.412469	0.679996	0.754516
Amuc_0574	2936.04	0.0793706	0.193907	0.409324	0.682302	0.756676
Amuc_0263	868.607	-0.0947492	0.233349	-0.40604	0.684713	0.758285
Amuc_0688	785.434	0.125717	0.30903	0.406811	0.684147	0.758285
Amuc_2173	491.561	0.107884	0.265803	0.405878	0.684832	0.758285
Amuc_R0058	62.9719	-0.185539	0.459152	-0.40409	0.686147	0.75934
Amuc_0946	11193	0.149321	0.37075	0.402753	0.68713	0.760029
Amuc_1283	32570.9	0.0872935	0.218503	0.399508	0.689519	0.762272
Amuc_0252	535.581	-0.100656	0.254455	-0.39557	0.692419	0.765076
Amuc_0208	636.451	-0.0800425	0.203618	-0.3931	0.694245	0.766691
Amuc_1747	1406.98	-0.0811188	0.207306	-0.3913	0.695576	0.767758
Amuc_0291	4356.75	-0.172425	0.441654	-0.39041	0.696235	0.768084
Amuc_1163	979.801	0.122258	0.314128	0.389196	0.697131	0.768267
Amuc_1594	880.993	-0.0725893	0.186294	-0.38965	0.696796	0.768267
Amuc_1110	1126.99	-0.0617842	0.159505	-0.38735	0.698497	0.768566
Amuc_1189	1496.96	-0.19988	0.515148	-0.38801	0.698012	0.768566
Amuc_2142	1178.92	0.0584411	0.15087	0.387361	0.698489	0.768566
Amuc_1476	5886.81	-0.156651	0.406164	-0.38568	0.699731	0.769521
Amuc_0183	416.681	-0.103078	0.267959	-0.38468	0.700476	0.769939
Amuc_0009	885.343	-0.114727	0.299964	-0.38247	0.702114	0.770908
Amuc_0295	805.816	-0.11479	0.300492	-0.38201	0.702456	0.770908
Amuc_2069	4.94031	-0.306048	0.800672	-0.38224	0.702284	0.770908
Amuc_0372	40868.1	-0.213963	0.561911	-0.38078	0.703368	0.771507
Amuc_1030	334.252	-0.100914	0.267457	-0.37731	0.705944	0.773896
Amuc_1930	37.1897	-0.278404	0.738757	-0.37685	0.706281	0.773896
Amuc_1947	2016.22	0.079664	0.214878	0.37074	0.710831	0.778476
Amuc_0876	4622.41	0.0455971	0.123318	0.369753	0.711566	0.778877
Amuc_1161	105.316	-0.095524	0.265632	-0.35961	0.719139	0.786186
Amuc_1298	3162.41	-0.404845	1.12841	-0.35877	0.719764	0.786186
Amuc_1696	190.407	0.0559145	0.155463	0.359664	0.719099	0.786186
Amuc_2174	312.618	0.0729503	0.203289	0.35885	0.719707	0.786186
EBG00001268335	1.54279	-0.544936	1.52085	-0.35831	0.720111	0.786186
Amuc_0336	7096.43	-0.103202	0.290414	-0.35536	0.722319	0.788188
Amuc_0264	1561.04	-0.0587843	0.165719	-0.35472	0.722797	0.788302
Amuc_2131	5055.46	-0.163016	0.46119	-0.35347	0.723737	0.788918
Amuc_1483	658.165	-0.0940392	0.26731	-0.3518	0.72499	0.789585
Amuc_1783	359.656	-0.14334	0.407616	-0.35165	0.725098	0.789585
Amuc_0743	387.375	0.0578526	0.165009	0.350602	0.725887	0.790035
Amuc_1263	3663.8	0.077928	0.224375	0.347312	0.728357	0.792314
Amuc_0294	2832.58	-0.115317	0.333104	-0.34619	0.7292	0.792413
Amuc_1056	2609.78	0.0539263	0.155623	0.346518	0.728953	0.792413
Amuc_0170	3657.51	-0.162519	0.470828	-0.34518	0.729961	0.792421
Amuc_1296	680.821	-0.299801	0.867338	-0.34566	0.729601	0.792421
Amuc_1024	1058.53	0.0520204	0.151493	0.343385	0.731309	0.793476
Amuc_R0035	88.0987	-0.107561	0.319199	-0.33697	0.736138	0.798304
EBG00001268366	2.14251	-0.614721	1.87079	-0.32859	0.742466	0.804752
Amuc_1076	618.679	0.0756106	0.230677	0.327778	0.74308	0.804922
Amuc_R0023	1772.77	0.155597	0.47529	0.327372	0.743387	0.804922
Amuc_0559	5642.75	-0.117072	0.360123	-0.32509	0.745115	0.806378
Amuc_0095	1118.37	-0.0978558	0.303872	-0.32203	0.74743	0.808469
Amuc_0511	1488.41	0.061842	0.192386	0.321447	0.747871	0.80853
Amuc_1799	505.181	0.124828	0.394268	0.316607	0.751542	0.812081
Amuc_1284	0.7863	-0.695292	2.22456	-0.31255	0.75462	0.814572
Amuc_1314	293.249	0.0819669	0.26205	0.312791	0.754439	0.814572
Amuc_1371	22.9594	-0.149522	0.487556	-0.30668	0.75909	0.818977
Amuc_1770	911.975	-0.0875078	0.288251	-0.30358	0.761446	0.821099
Amuc_0099	335.649	0.0805329	0.266411	0.302289	0.762432	0.821321
Amuc_0816	5001.72	-0.0516984	0.171001	-0.30233	0.762402	0.821321
EBG00001268356	2.18192	-0.481797	1.60811	-0.2996	0.764479	0.823105
Amuc_0292	932.102	0.119289	0.403304	0.295779	0.767399	0.825826
EBG00001268360	1.26475	0.635172	2.16165	0.293837	0.768882	0.827
Amuc_1562	3106.36	-0.0279491	0.095998	-0.29114	0.770941	0.828791
Amuc_0882	31979.9	-0.147523	0.511141	-0.28861	0.772876	0.830448
Amuc_0667	844.809	0.0716296	0.249542	0.287044	0.774079	0.830591
Amuc_1642	4576.77	0.0680707	0.237346	0.286799	0.774266	0.830591
Amuc_1662	43.6109	0.151791	0.527238	0.287899	0.773424	0.830591
Amuc_1749	243.681	-0.0814081	0.284266	-0.28638	0.774587	0.830591
Amuc_R0009	20.0193	-0.168108	0.591708	-0.28411	0.776328	0.832034
Amuc_0710	1042.95	-0.095227	0.337103	-0.28249	0.77757	0.832941
Amuc_0053	1114.47	-0.0660688	0.234675	-0.28153	0.778301	0.833301
Amuc_0989	20.028	-0.214364	0.766212	-0.27977	0.779653	0.834078
Amuc_1158	123.803	0.126345	0.451952	0.279554	0.77982	0.834078
Amuc_1077	630.886	-0.0903139	0.324647	-0.27819	0.780866	0.834773
Amuc_0138	102.919	-0.0952993	0.34655	-0.27499	0.783321	0.836973
Amuc_1037	228.037	0.157788	0.575861	0.274003	0.784082	0.837284
Amuc_1374	20.6864	-0.26673	0.974962	-0.27358	0.784407	0.837284
Amuc_0532	2144.37	0.0766229	0.282459	0.271271	0.786183	0.837595
Amuc_0680	1256.52	-0.0279096	0.102926	-0.27116	0.786266	0.837595
Amuc_1090	816.579	-0.118513	0.437938	-0.27062	0.786687	0.837595
Amuc_1411	5653.96	0.057877	0.213043	0.271668	0.785878	0.837595
Amuc_1923	108.482	-0.0895769	0.330408	-0.27111	0.786306	0.837595
Amuc_0957	2807.06	-0.0497052	0.184663	-0.26917	0.787801	0.838357
Amuc_R0050	26.1423	-0.159726	0.595996	-0.268	0.7887	0.838467
EBG00001268314	3.63083	-0.433866	1.61827	-0.26811	0.788618	0.838467
Amuc_0489	5010.34	0.0719972	0.269397	0.267253	0.789274	0.838654
Amuc_0038	9103.73	0.15122	0.568933	0.265795	0.790397	0.839423
Amuc_0867	11055.3	0.0479013	0.180876	0.264829	0.791141	0.839638
Amuc_1724	0.839289	0.80845	3.05655	0.264498	0.791396	0.839638
Amuc_1680	206.4	0.0810694	0.307703	0.263467	0.792191	0.840057
Amuc_1299	2609.42	-0.3072	1.17271	-0.26196	0.793353	0.840867
Amuc_1088	9487.99	-0.157377	0.602052	-0.2614	0.793783	0.840899
Amuc_1444	144.577	-0.0667575	0.256821	-0.25994	0.794911	0.841671
Amuc_1852	919.706	0.0459191	0.182582	0.251499	0.801428	0.848145
Amuc_R0057	154.006	0.113275	0.454092	0.249453	0.80301	0.849392
Amuc_0275	1949.87	-0.0902227	0.368993	-0.24451	0.806835	0.85301
Amuc_1083	164.679	-0.116533	0.481516	-0.24201	0.808771	0.854627
Amuc_1066	324.264	0.0617447	0.25636	0.240851	0.80967	0.855148
Amuc_1540	1674.28	-0.130116	0.559793	-0.23244	0.8162	0.861613
Amuc_1763	1541.87	-0.0687187	0.297099	-0.2313	0.817082	0.862112
Amuc_0323	18.0493	-0.11868	0.517256	-0.22944	0.818526	0.862339
Amuc_1237	687.466	0.0241521	0.10514	0.229713	0.818314	0.862339
[truncated: 108 more rows]

## Sheet: Droplet Tn-Seq
Droplet Tn-Seq and Transit output
TRANSIT analysis output of Droplet Tn-Seq data for A. muciniphila cultures grown in mucin
Orf	Desc	Sites	Mean Ctrl	Mean Exp	log2FC	U-Statistic	p-value	Adj. p-value
Amuc_0544	Tetratricopeptide TPR_2 repeat protein	3231	8382.1	243.8	-5.1	161	0.0001	0.41405
Amuc_0809	acetolactate synthase, small subunit	480	1225	9.2	-7.06	36	0.00477	1
Amuc_1101	cell division protein FtsA	1782	4460.2	75.9	-5.88	46	0.00729	1
Amuc_1543	formate acetyltransferase	2265	3288.4	195.9	-4.07	84	0.01133	1
Amuc_1283	outer membrane autotransporter barrel domain protein	9045	2915.7	958.2	-1.61	510	0.01212	1
Amuc_0824	glycoside hydrolase family 2 TIM barrel	3792	1783.7	1196.5	-0.58	133	0.01383	1
Amuc_0785	3-isopropylmalate dehydrogenase	1107	1670.9	93.3	-4.16	44	0.01475	1
Amuc_1102	hypothetical protein	714	10298.9	257.5	-5.32	33	0.02024	1
Amuc_1984	Methylmalonyl-CoA mutase	2052	142.4	4	-5.15	24	0.02078	1
Amuc_1246	hypothetical protein	1245	52803.2	8030.2	-2.72	146	0.02907	1
Amuc_0172	hypothetical protein	3897	156.9	3.2	-5.59	16	0.0294	1
Amuc_0833	Cupin 2 conserved barrel domain protein	351	134148	186.5	-9.49	16	0.03038	1
Amuc_1448	arginine biosynthesis bifunctional protein ArgJ	1251	1638.5	86.2	-4.25	16	0.03038	1
Amuc_1120	conserved hypothetical protein	2388	850.9	11.5	-6.21	16	0.03038	1
Amuc_2072	Rubrerythrin	573	2733.4	407.6	-2.75	23	0.03671	1
Amuc_1537	outer membrane autotransporter barrel domain protein	9456	196.4	81.3	-1.27	31	0.04495	1
Amuc_2013	O-acetylhomoserine/O-acetylserine sulfhydrylase	1284	1200.5	84.7	-3.83	31	0.04533	1
Amuc_0576	peptidase M16 domain protein	4326	2054	820.8	-1.32	63	0.05206	1
Amuc_0615	carbamoyl-phosphate synthase, large subunit	3192	4730.9	898.5	-2.4	76	0.05381	1
Amuc_1656	hypothetical protein	789	787.3	54.2	-3.86	15	0.0606	1
Amuc_1939	efflux transporter, RND family, MFP subunit	1110	1188.8	43.7	-4.77	30	0.06508	1
Amuc_1025	Disulfide bond chaperones of the HSP33 family-like protein	771	916.3	202.7	-2.18	30	0.06555	1
Amuc_1660	pseduogene	6079	4321.8	5073.9	0.23	138	0.0695	1
Amuc_0543	hypothetical protein	1020	17102	513.7	-5.06	9	0.07652	1
Amuc_1524	hypothetical protein	798	1560.9	18.7	-6.39	9	0.07652	1
Amuc_1295	binding-protein-dependent transport systems inner membrane component	777	25.1	1.3	-4.24	9	0.07652	1
Amuc_0747	aspartate decarboxylase	336	4794	28.3	-7.4	9	0.08086	1
Amuc_1060	Membrane-fusion protein-like protein	1422	670.6	28	-4.58	9	0.08086	1
Amuc_1430	ribosomal protein L31	327	586.7	79.7	-2.88	9	0.08086	1
Amuc_1190	Alcohol dehydrogenase zinc-binding domain protein	999	407.7	3.3	-6.93	9	0.08086	1
Amuc_1890	Undecaprenyl-diphosphatase	834	374.3	26.3	-3.83	9	0.08086	1
Amuc_0625	Exo-alpha-sialidase	1257	333.3	21.7	-3.94	9	0.08086	1
Amuc_2112	hypothetical protein	2907	248.8	30.7	-3.02	9	0.08086	1
Amuc_1891	hypothetical protein	885	196.2	71	-1.47	9	0.08086	1
Amuc_0336	TonB-dependent receptor	2220	1126.2	470.9	-1.26	60	0.0934	1
Amuc_0428	hypothetical protein	825	552.7	55	-3.33	21	0.09369	1
Amuc_0871	large conductance mechanosensitive channel protein	411	2414.3	426.2	-2.5	14	0.11235	1
Amuc_1123	hypothetical protein	1500	2075.5	202.2	-3.36	14	0.11235	1
Amuc_1301	cysteine synthase A	927	304.2	40.8	-2.9	14	0.11235	1
Amuc_0372	glutamate decarboxylase	1398	234.7	37.2	-2.66	14	0.11235	1
Amuc_1039	outer membrane autotransporter barrel domain protein	5595	2503.8	1563.5	-0.68	47	0.12781	1
Amuc_0537	peptidase M42 family protein	1077	6384.7	1111.8	-2.52	28	0.12821	1
Amuc_1868	glycoside hydrolase family 57	1185	428.6	90.6	-2.24	20	0.14367	1
Amuc_1412	hypothetical protein	1212	26876.5	99881.6	1.89	66	0.1478	1
Amuc_1974	pyruvate, phosphate dikinase	2742	1067.1	353	-1.6	27	0.17349	1
Amuc_0126	hypothetical protein	2307	2849.6	275	-3.37	8	0.19043	1
Amuc_0242	pseudouridine synthase	1401	1136.2	520.3	-1.13	8	0.19043	1
Amuc_1599	hypothetical protein	1773	627.6	37.3	-4.07	8	0.19043	1
Amuc_0290	glycoside hydrolase family 2 sugar binding	2958	526.4	28.3	-4.22	8	0.19043	1
Amuc_2136	Glycoside hydrolase, family 20, catalytic core	2268	203.4	50.3	-2.01	8	0.19043	1
Amuc_1704	hypothetical protein	1641	4687.2	491.8	-3.25	13	0.19393	1
Amuc_1258	glutamine synthetase catalytic region	2109	4080.1	236	-4.11	13	0.19393	1
Amuc_1684	TonB-dependent receptor	2004	1717.1	571.5	-1.59	13	0.19393	1
Amuc_0036	YD repeat protein	5871	438.6	39.8	-3.46	13	0.19393	1
Amuc_0508	ATP synthase F1, alpha subunit	1530	385.4	249.2	-0.63	13	0.19393	1
Amuc_1409	conserved hypothetical protein	450	268	136.2	-0.98	13	0.19393	1
Amuc_0670	Trypsin-like protein serine protease typically periplasmic contain C-terminal PDZ domain-like protein	1578	2658	348.8	-2.93	19	0.21008	1
Amuc_1869	glycosyl transferase group 1	1296	1292.2	358.8	-1.85	19	0.21008	1
Amuc_0394--Amuc_0395	intergenic	189	486.8	1	-8.93	4	0.22067	1
Amuc_2156--Amuc_2157	intergenic	951	88.8	1	-6.47	4	0.22067	1
Amuc_0152	Tubulin/FtsZ GTPase	1455	61.5	1	-5.94	4	0.22067	1
Amuc_0559	Argininosuccinate synthase	1290	25.8	1	-4.69	4	0.22067	1
Amuc_0077	2-amino-3-ketobutyrate coenzyme A ligase	1197	26645	7327	-1.86	4	0.24528	1
Amuc_0044	Diaminopimelate epimerase	822	10575.7	1263	-3.07	4	0.24528	1
Amuc_0969	galactokinase	1176	3011.1	1188	-1.34	4	0.24528	1
Amuc_1661	hypothetical protein	645	1843.5	282.5	-2.71	4	0.24528	1
Amuc_1485	hypothetical protein	1002	1557.6	59.5	-4.71	4	0.24528	1
Amuc_1946	dihydrodipicolinate synthetase	915	1346.9	70	-4.27	4	0.24528	1
Amuc_1575	DEAD/DEAH box helicase domain protein	561	1118	112.5	-3.31	4	0.24528	1
Amuc_0669	2-alkenal reductase	1572	1080.3	36	-4.91	4	0.24528	1
Amuc_1125	UDP-glucose 4-epimerase	987	1063.9	8	-7.06	4	0.24528	1
Amuc_0546	Biopolymer transport protein ExbD/TolR	456	1026.7	17.5	-5.87	4	0.24528	1
Amuc_1101--Amuc_1102	intergenic	97	1022.3	6	-7.41	4	0.24528	1
Amuc_0584	outer membrane autotransporter barrel domain protein	6906	705.8	183	-1.95	4	0.24528	1
Amuc_0524	hypothetical protein	783	692.2	129.5	-2.42	4	0.24528	1
Amuc_1623	MiaB-like tRNA modifying enzyme YliG	1356	675.4	16	-5.4	4	0.24528	1
Amuc_1227	conserved hypothetical protein	312	613.5	78.5	-2.97	4	0.24528	1
Amuc_1126	dimethyladenosine transferase	1377	606.6	37.5	-4.02	4	0.24528	1
Amuc_0121	sulfatase	1578	588.7	27	-4.45	4	0.24528	1
Amuc_0446--Amuc_0447	intergenic	67	577.3	4.5	-7	4	0.24528	1
Amuc_0052	Hyalurononglucosaminidase	2859	542.4	28.5	-4.25	4	0.24528	1
Amuc_0274	putative signal transduction protein with EFhand domain	849	464.9	7	-6.05	4	0.24528	1
Amuc_1105	hypothetical protein	657	463.4	5.5	-6.4	4	0.24528	1
Amuc_0820	ErfK/YbiS/YcfS/YnhG family protein	729	434.3	47.5	-3.19	4	0.24528	1
Amuc_1297	putative substrate-binding protein of aliphatic sulfonate ABC transporter	1071	318.5	78	-2.03	4	0.24528	1
Amuc_0745	hypothetical protein	639	290.4	4.5	-6.01	4	0.24528	1
Amuc_0166	twitching motility protein	1092	283	8	-5.14	4	0.24528	1
Amuc_0065	2-isopropylmalate synthase	1554	263.6	8.5	-4.95	4	0.24528	1
Amuc_0938	Polyphosphate kinase	2085	258.1	20.5	-3.65	4	0.24528	1
Amuc_0451--Amuc_0452	intergenic	415	255.8	16.5	-3.95	4	0.24528	1
Amuc_0196	serine/threonine protein kinase	1641	252.4	6.5	-5.28	4	0.24528	1
Amuc_1299	sulfate adenylyltransferase, small subunit	909	227.9	22	-3.37	4	0.24528	1
Amuc_0265--Amuc_0266	intergenic	145	208.5	16	-3.7	4	0.24528	1
Amuc_0690	hypothetical protein	1278	208	6	-5.12	4	0.24528	1
Amuc_0775	thioesterase superfamily protein	465	201.3	5	-5.33	4	0.24528	1
Amuc_1841	Thioredoxin domain	942	196	26	-2.91	4	0.24528	1
Amuc_0867	peptidase M42 family protein	1146	164.1	44.5	-1.88	4	0.24528	1
Amuc_1903	conserved hypothetical protein	1005	145.9	28.5	-2.36	4	0.24528	1
Amuc_1265--Amuc_1266	intergenic	162	137.2	16	-3.1	4	0.24528	1
Amuc_0343	Thiol:disulfide interchange protein-like protein	2328	125.7	4	-4.97	4	0.24528	1
Amuc_R0059	tRNA-Gln	72	91.8	23.5	-1.97	4	0.24528	1
Amuc_0334	protein of unknown function DUF214	2823	69.7	3	-4.54	4	0.24528	1
Amuc_2134	conserved hypothetical protein	399	1297.3	2443	0.91	12	0.30942	1
Amuc_0394	hypothetical protein	756	56745.7	3754.5	-3.92	12	0.31232	1
Amuc_1421	serine/threonine protein kinase	2613	5022.9	423	-3.57	12	0.31232	1
Amuc_0895	conserved hypothetical protein	456	3834.8	350.5	-3.45	12	0.31232	1
Amuc_1794	peptidase S24 and S26 domain protein	804	2710.5	1751.8	-0.63	12	0.31232	1
Amuc_0581	diaminopimelate dehydrogenase	879	678.1	333.2	-1.02	12	0.31232	1
Amuc_0834	transcriptional regulator, MarR family with acetyltransferase activity	954	14941	15693.9	0.07	42	0.31843	1
Amuc_0513	hypothetical protein	2199	6424.5	6129.3	-0.07	88	0.37084	1
Amuc_0840	sulfate transporter	1677	105241	58176.3	-0.86	7	0.38273	1
Amuc_1687	hypothetical protein	666	18277.1	2516.7	-2.86	7	0.38273	1
Amuc_1781	ATPase associated with various cellular activities AAA_3	981	7066.6	208.3	-5.08	7	0.38273	1
Amuc_0175	PDZ/DHR/GLGF domain protein	1170	4192.9	1155	-1.86	7	0.38273	1
Amuc_1865	MotA/TolQ/ExbB proton channel	630	4033.5	445	-3.18	7	0.38273	1
Amuc_1056	hypothetical protein	735	3339.2	910	-1.88	7	0.38273	1
Amuc_0066	putative ATP/GTP-binding protein	912	1815.9	410.3	-2.15	7	0.38273	1
Amuc_2099	hypothetical protein	912	1705	571.7	-1.58	7	0.38273	1
Amuc_0109	transcriptional regulator, MarR family	423	1342.1	449.3	-1.58	7	0.38273	1
Amuc_1184	Phosphopyruvate hydratase	1278	798.3	304	-1.39	7	0.38273	1
Amuc_1298	sulfate adenylyltransferase, large subunit	1725	285.2	63.3	-2.17	7	0.38273	1
Amuc_0235	alpha-glucan phosphorylase	1662	10808.8	9965	-0.12	62	0.38467	1
Amuc_0447	glycine cleavage system H protein	378	78822.1	51698	-0.61	17	0.4034	1
Amuc_2070	Catalase	2253	1003.4	280.2	-1.84	11	0.46783	1
Amuc_0448	glycine dehydrogenase	2844	8186.5	2197.5	-1.9	11	0.47049	1
Amuc_0446	glycine cleavage system T protein	1083	6122.8	5562.5	-0.14	11	0.47049	1
Amuc_0435	hypothetical protein	882	3676	3522.5	-0.06	23	0.47117	1
Amuc_0836	ATP-dependent chaperone ClpB	2580	1843.3	1627.2	-0.18	23	0.47117	1
Amuc_1266	hypothetical protein	660	74976.8	108543	0.53	16	0.53087	1
Amuc_0347	iojap-like protein	348	4058.1	1881.6	-1.11	16	0.53087	1
Amuc_1074	sulfatase	1656	8493.6	11938.4	0.49	29	0.60928	1
Amuc_1091	Cytochrome-c peroxidase	1377	895.6	1266.3	0.5	6	0.65791	1
Amuc_1413	capsular exopolysaccharide family	2205	15653.8	7792.3	-1.01	6	0.66252	1
Amuc_0275	preprotein translocase, YajC subunit	330	14580.3	4202	-1.79	6	0.66252	1
Amuc_1982	hypothetical protein	702	6358.5	10285.3	0.69	3	0.66252	1
Amuc_1500	polysaccharide deacetylase	960	4632	3479.7	-0.41	6	0.66252	1
Amuc_2077	polysaccharide export protein	780	4169.2	822	-2.34	6	0.66252	1
Amuc_0694	hypothetical protein	1182	1609.4	224.3	-2.84	6	0.66252	1
Amuc_1911	iron-containing alcohol dehydrogenase	1158	1394.3	337.7	-2.05	6	0.66252	1
Amuc_0687	outer membrane autotransporter barrel domain protein	3132	364	666.7	0.87	6	0.66252	1
Amuc_0946	DJ-1 family protein	561	339.8	261.3	-0.38	6	0.66252	1
Amuc_1661--Amuc_1662	intergenic	336	7256.1	9048.8	0.32	10	0.66501	1
Amuc_0356	hypothetical protein	480	15564.8	17061	0.13	15	0.6761	1
Amuc_1665	conserved hypothetical protein	939	4695.2	6732.6	0.52	15	0.6761	1
Amuc_0456	DoxX family protein	459	32.5	2	-4.02	2	0.68309	1
Amuc_0952	hypothetical protein	756	4292.5	9525.3	1.15	21	0.68892	1
Amuc_0215	hypothetical protein	600	39928.6	7220	-2.47	3	0.69854	1
Amuc_0794	hypothetical protein	432	31314.4	89821.5	1.52	2	0.69854	1
Amuc_0461	PDZ/DHR/GLGF domain protein	873	24913.1	4182	-2.57	3	0.69854	1
Amuc_1209	hypothetical protein	747	24766.1	22069	-0.17	2	0.69854	1
Amuc_0821	Peptidoglycan-binding LysM	492	20695.8	5345.5	-1.95	3	0.69854	1
Amuc_0335	ABC transporter related	744	19895.2	5687	-1.81	3	0.69854	1
Amuc_0267	hypothetical protein	489	17621.9	8447	-1.06	3	0.69854	1
Amuc_1584	type II secretion system protein	1266	15160.9	402.5	-5.24	3	0.69854	1
Amuc_1316	transcriptional regulator, MarR family	459	13485.8	49452	1.87	2	0.69854	1
Amuc_0384	Maltose O-acetyltransferase	639	9700.7	660.5	-3.88	3	0.69854	1
Amuc_0355	hypothetical protein	513	8753.5	8079	-0.12	2	0.69854	1
Amuc_1426	hypothetical protein	831	7001.6	6739	-0.06	2	0.69854	1
Amuc_1229	hypothetical protein	774	6878.4	557.5	-3.63	3	0.69854	1
Amuc_1558	peptidase M50	1443	6822.2	263	-4.7	3	0.69854	1
Amuc_0882	hypothetical protein	327	6391.3	4787	-0.42	3	0.69854	1
Amuc_0684	transcriptional regulator, HxlR family	363	6171.7	4228.5	-0.55	3	0.69854	1
Amuc_1443	hypothetical protein	1380	6149.3	203	-4.92	3	0.69854	1
Amuc_2170--Amuc_2171	intergenic	423	5393.4	2882.5	-0.9	3	0.69854	1
Amuc_2141	hypothetical protein	486	5308.1	9548.5	0.85	1	0.69854	1
Amuc_0088	hypothetical protein	1950	4408.3	3362.5	-0.39	3	0.69854	1
Amuc_1592	Superoxide dismutase	642	3587.9	1397	-1.36	3	0.69854	1
Amuc_1456	hypothetical protein	516	3127.8	3300.5	0.08	2	0.69854	1
Amuc_0999	sigma 54 modulation protein/ribosomal protein S30EA	591	2969.5	1797	-0.72	3	0.69854	1
Amuc_1310--Amuc_1311	intergenic	142	2736.3	2490	-0.14	3	0.69854	1
Amuc_1716	Tetratricopeptide TPR_2 repeat protein	1665	2400.8	129	-4.22	3	0.69854	1
Amuc_0059	ATPase AAA-2 domain protein	2580	2366.6	1767	-0.42	3	0.69854	1
Amuc_0688	hypothetical protein	738	1667.2	1051.5	-0.66	3	0.69854	1
Amuc_0739	transferase hexapeptide repeat containing protein	600	1369	169	-3.02	3	0.69854	1
Amuc_1036	GTP-binding protein LepA	1797	1354.8	402	-1.75	3	0.69854	1
Amuc_2002	heat shock protein Hsp90	1839	1272.8	750.5	-0.76	3	0.69854	1
Amuc_0359	hypothetical protein	1104	1163.1	638	-0.87	3	0.69854	1
Amuc_2034	Methylmalonyl-CoA carboxytransferase	1521	1137.6	146.5	-2.96	3	0.69854	1
Amuc_1915	type I restriction-modification system, M subunit	2559	1086.2	1866.5	0.78	2	0.69854	1
Amuc_1293--Amuc_1294	intergenic	229	849.3	949.5	0.16	2	0.69854	1
Amuc_2051	Glutamate dehydrogenase (NADP(+))	1353	609.3	1583.5	1.38	1	0.69854	1
Amuc_2057	hypothetical protein	501	533.7	275.5	-0.95	3	0.69854	1
Amuc_0944	conserved hypothetical protein	1197	525.4	837.5	0.67	2	0.69854	1
Amuc_0473	hypothetical protein	969	493.6	173.5	-1.51	3	0.69854	1
Amuc_0536	hypothetical protein	777	453.3	215.5	-1.07	3	0.69854	1
Amuc_0283	hypothetical protein	261	408.7	23.5	-4.12	3	0.69854	1
Amuc_1476	ribosomal protein S6	282	400.1	259	-0.63	3	0.69854	1
Amuc_1300	adenylylsulfate reductase, thioredoxin dependent	681	299.6	80.5	-1.9	3	0.69854	1
Amuc_1722	outer membrane autotransporter barrel domain protein	5526	297.8	154	-0.95	3	0.69854	1
Amuc_1312	peptidase M16 domain protein	2520	260.7	95	-1.46	3	0.69854	1
Amuc_1052	trigger factor	1308	232	100.5	-1.21	3	0.69854	1
Amuc_1936	hypothetical protein	429	86.7	22	-1.98	3	0.69854	1
Amuc_1399	(NiFe) hydrogenase maturation protein HypF	2325	22.4	3	-2.9	3	0.69854	1
Amuc_1713	succinyl-CoA synthetase, beta subunit	1179	686.3	837	0.29	11	0.83453	1
Amuc_1069	adenosylhomocysteinase	1413	7948.5	4542.5	-0.81	9	0.88523	1
Amuc_1213	hypothetical protein	441	951.5	834.2	-0.19	9	0.88523	1
Amuc_0815	hypothetical protein	681	5429.3	8378.7	0.63	26	0.89833	1
Amuc_0360	hypothetical protein	552	7420.6	6942.3	-0.1	19	0.93619	1
Amuc_1333	hypothetical protein	843	41770.4	112324	1.43	32	0.95812	1
Amuc_0789	hypothetical protein	651	15064.1	31296	1.05	50	0.96985	1
Amuc_0764--Amuc_0765	intergenic	146	124531	153619	0.3	0	1	1
Amuc_1189	ribosomal protein L28	261	118582	522050	2.14	0	1	1
Amuc_1197	helicase c2	1983	71258	72000	0.01	0	1	1
Amuc_0460	hypothetical protein	519	68552.7	126570	0.88	0	1	1
Amuc_1112	hypothetical protein	126	55371.9	1965	-4.82	1	1	1
Amuc_0459	RNA polymerase, sigma-24 subunit, ECF subfamily	597	49618.9	10990	-2.17	1	1	1
Amuc_0967	RNP-1 like RNA-binding protein	663	49441.7	76527	0.63	5	1	1
Amuc_1179	ABC transporter related	795	42444.9	20256.7	-1.07	5	1	1
Amuc_1230	hypothetical protein	813	41215.9	3328	-3.63	1	1	1
Amuc_2043--Amuc_2044	intergenic	667	36156.4	55052	0.61	0	1	1
Amuc_R0059--Amuc_2018	intergenic	149	29544.4	34181	0.21	0	1	1
Amuc_1028	hypothetical protein	648	29310	101074	1.79	4	1	1
Amuc_2165	hypothetical protein	738	26848.3	28866	0.1	4	1	1
Amuc_0555--Amuc_0556	intergenic	136	24794.9	1909	-3.7	1	1	1
Amuc_0556--Amuc_0557	intergenic	69	20246.8	56283	1.48	0	1	1
Amuc_0686	ABC transporter related	2529	19094.4	593	-5.01	1	1	1
Amuc_1268	L-serine dehydratase 1	1377	18405.8	2723	-2.76	1	1	1
Amuc_0866	mucin-associated surface protein (MASP)	573	15801.3	23442.7	0.57	5	1	1
Amuc_1486	hypothetical protein	459	13986.8	84	-7.38	1	1	1
Amuc_1205--Amuc_1206	intergenic	242	12381.6	4712	-1.39	1	1	1
Amuc_1282--Amuc_1283	intergenic	304	11889.6	19219	0.69	0	1	1
Amuc_1443--Amuc_1444	intergenic	407	11188.9	619	-4.18	1	1	1
Amuc_1521	DNA methylase N-4/N-6 domain protein	1896	10576.2	3144	-1.75	1	1	1
Amuc_1358	hypothetical protein	462	10562.6	296	-5.16	1	1	1
Amuc_0029	NAD-dependent epimerase/dehydratase	924	9566.1	286	-5.06	1	1	1
Amuc_0253	Peptidase M23	867	9414	564	-4.06	1	1	1
Amuc_0863	glycosyl hydrolase family 88	2232	8191.6	6375	-0.36	1	1	1
Amuc_1309--Amuc_1310	intergenic	32	8095.3	4475	-0.86	1	1	1
Amuc_1420--Amuc_1421	intergenic	337	8015.8	265	-4.92	1	1	1
Amuc_0907--Amuc_0908	intergenic	136	7706.3	207	-5.22	1	1	1
Amuc_1763	alanine racemase domain protein	693	7556.6	375	-4.33	1	1	1
Amuc_2021	NUDIX hydrolase	474	7520.2	780	-3.27	1	1	1
Amuc_0975--Amuc_0976	intergenic	65	7453.3	12265	0.72	0	1	1
Amuc_0434--Amuc_0435	intergenic	139	6959.8	11514	0.73	0	1	1
Amuc_1771	aminotransferase class I and II	1173	6255.4	138	-5.5	1	1	1
Amuc_1309	Aldose 1-epimerase	957	6249.8	8142	0.38	0	1	1
Amuc_2079--Amuc_2080	intergenic	35	5846.3	77	-6.25	1	1	1
Amuc_1502	pseduogene	1040	5744.9	12614	1.13	0	1	1
Amuc_0386	conserved hypothetical protein	1629	5447.5	421	-3.69	1	1	1
Amuc_0711	sodium/hydrogen exchanger	1743	5408.8	8473	0.65	0	1	1
Amuc_0148--Amuc_0149	intergenic	203	5406.5	9267	0.78	0	1	1
Amuc_2178	Amino-acid N-acetyltransferase	10	5278.3	182	-4.86	1	1	1
Amuc_0452	DEAD/DEAH box helicase domain protein	1812	4599.1	1335	-1.78	1	1	1
Amuc_1700	tryptophan synthase, beta subunit	1221	4499.9	816	-2.46	1	1	1
Amuc_0419	General substrate transporter	1959	4445.4	446	-3.32	1	1	1
Amuc_1506	ribosomal protein L17	408	4353.2	10061	1.21	0	1	1
Amuc_0154	hypothetical protein	603	4349.3	4591	0.08	0	1	1
Amuc_1385	hypothetical protein	513	4306.3	22	-7.61	1	1	1
Amuc_1219--Amuc_R0036	intergenic	766	4202.9	1734	-1.28	1	1	1
Amuc_0965	hypothetical protein	1872	4181.8	386	-3.44	1	1	1
Amuc_0380	protein of unknown function DUF21	1323	4169.1	229	-4.19	1	1	1
Amuc_0859	anion transporter	1737	4037.1	473	-3.09	1	1	1
Amuc_1185	aminotransferase class I and II	1593	3968	660	-2.59	1	1	1
Amuc_1776	TPR repeat-containing protein	2412	3897.5	8	-8.93	1	1	1
Amuc_1055	5,10-methylenetetrahydrofolate reductase	933	3878.3	139	-4.8	1	1	1
Amuc_0147	Thioredoxin domain	963	3844.4	4898.3	0.35	4	1	1
Amuc_1471--Amuc_1472	intergenic	130	3326.3	2189	-0.6	1	1	1
Amuc_0260	Redoxin domain protein	2190	3298.3	2646	-0.32	1	1	1
Amuc_0337	Prephenate dehydrogenase	885	3198.2	18	-7.47	1	1	1
Amuc_0168	hypothetical protein	1545	3182.4	635	-2.33	1	1	1
Amuc_R0062	tRNA-Val	72	3176.6	1500	-1.08	1	1	1
Amuc_0020	major facilitator superfamily MFS_1	1152	3117.3	229	-3.77	1	1	1
Amuc_0905--Amuc_0906	intergenic	369	3073.6	568	-2.44	1	1	1
Amuc_1856	metallophosphoesterase	756	3023.5	4	-9.56	1	1	1
Amuc_1453--Amuc_1454	intergenic	67	2903	1196	-1.28	1	1	1
Amuc_0722	GTP-binding protein TypA	1833	2874.7	249	-3.53	1	1	1
Amuc_0970	SSS sodium solute transporter superfamily	2295	2779	294	-3.24	1	1	1
Amuc_1549	Cof-like hydrolase	837	2715.3	7942	1.55	0	1	1
Amuc_1008	glycoside hydrolase family 31	3933	2699.2	35	-6.27	1	1	1
Amuc_1943	Tetratricopeptide TPR_2 repeat protein	2751	2627.6	10	-8.04	1	1	1
Amuc_0385	ErfK/YbiS/YcfS/YnhG family protein	876	2610.9	523	-2.32	1	1	1
Amuc_0572	hypothetical protein	327	2592.5	559	-2.21	1	1	1
Amuc_2053	SNARE associated Golgi protein	648	2497.5	450	-2.47	1	1	1
Amuc_1036--Amuc_1037	intergenic	244	2493.1	1461	-0.77	1	1	1
Amuc_0371	two component regulator propeller domain protein	2574	2490.6	341	-2.87	1	1	1
Amuc_1676	Eco57I restriction endonuclease	1995	2465.5	90	-4.78	1	1	1
Amuc_0061	pseduogene	1074	2441.9	174	-3.81	1	1	1
Amuc_1057	hypothetical protein	270	2425.7	1025	-1.24	1	1	1
Amuc_0050--Amuc_0051	intergenic	571	2288.3	343	-2.74	1	1	1
Amuc_1398	hydrogenase accessory protein HypB	738	2175.6	3080.3	0.5	4	1	1
Amuc_0872	acetylornithine and succinylornithine aminotransferase	1254	2138.2	738	-1.53	1	1	1
Amuc_1128	conserved hypothetical protein	261	2113	418	-2.34	1	1	1
Amuc_0573	3'-5' exonuclease	1056	2111	209	-3.34	1	1	1
Amuc_0906	methionine-R-sulfoxide reductase	1125	2104.8	690	-1.61	1	1	1
Amuc_1205	ribosomal protein L9	453	2030.7	2118	0.06	0	1	1
Amuc_0215--Amuc_0216	intergenic	597	2011.7	1423	-0.5	1	1	1
Amuc_0037	amino acid permease-associated region	1482	1916.7	1705	-0.17	1	1	1
Amuc_0241	Sel1 domain protein repeat-containing protein	1440	1878.9	146	-3.69	1	1	1
Amuc_0783	phosphoadenosine phosphosulfate reductase	1293	1833.4	652	-1.49	1	1	1
Amuc_1854	binding-protein-dependent transport systems inner membrane component	1605	1720.3	113	-3.93	1	1	1
Amuc_0096	transcriptional regulator, TraR/DksA family	621	1656.6	117	-3.82	1	1	1
Amuc_R0056--Amuc_1850	intergenic	206	1616.3	556	-1.54	1	1	1
Amuc_0543--Amuc_0544	intergenic	44	1517.5	9	-7.4	1	1	1
Amuc_0292	hypothetical protein	840	1509.4	145	-3.38	1	1	1
Amuc_0362	hypothetical protein	420	1482.6	806	-0.88	1	1	1
Amuc_0548	MotA/TolQ/ExbB proton channel	789	1420.5	92	-3.95	1	1	1
Amuc_1792--Amuc_R0055	intergenic	184	1352.3	1165	-0.22	1	1	1
Amuc_0858--Amuc_0859	intergenic	64	1308.4	18	-6.18	1	1	1
Amuc_0939	glycosyl transferase family 8	1113	1249.9	74	-4.08	1	1	1
Amuc_0017	oxidoreductase domain protein	1443	1109.9	597	-0.89	1	1	1
Amuc_2038	PUR-alpha/beta/gamma DNA/RNA-binding	210	1016.5	710	-0.52	1	1	1
Amuc_1705--Amuc_R0051	intergenic	66	1007.6	440	-1.2	1	1	1
Amuc_0127	transposase IS3/IS911 family protein	378	979	50	-4.29	1	1	1
Amuc_1123--Amuc_1124	intergenic	146	962.8	66	-3.87	1	1	1
Amuc_1032	Beta-N-acetylhexosaminidase	1554	954.1	682	-0.48	1	1	1
Amuc_1523	hypothetical protein	744	919.7	17	-5.76	1	1	1
Amuc_0354	hypothetical protein	1287	905.7	9	-6.65	1	1	1
Amuc_2167	Oligopeptidase A	2100	894.3	369	-1.28	1	1	1
Amuc_2036--Amuc_2037	intergenic	119	886.5	380	-1.22	1	1	1
Amuc_1100	hypothetical protein	951	877.1	10	-6.45	1	1	1
Amuc_0246	transcriptional regulator, MarR family	399	862.9	21	-5.36	1	1	1
Amuc_1655	sulfatase	1662	859.5	316	-1.44	1	1	1
Amuc_0671	3-dehydroquinate synthase	1161	820.7	12	-6.1	1	1	1
Amuc_0865	Rubrerythrin	546	801.5	184	-2.12	1	1	1
Amuc_1919	Nucleotidyl transferase	909	790.3	9	-6.46	1	1	1
Amuc_1525	hypothetical protein	1068	743.8	5	-7.22	1	1	1
Amuc_1107	ATP phosphoribosyltransferase	873	723.5	3869	2.42	0	1	1
Amuc_0586	maf protein	567	721.1	64	-3.49	1	1	1
Amuc_1760	ABC transporter related	876	706.2	1	-9.46	1	1	1
Amuc_0328	hypothetical protein	2013	699.4	13	-5.75	1	1	1
Amuc_2043	RND efflux system, outer membrane lipoprotein, NodT family	1431	676.2	356	-0.93	1	1	1
Amuc_1764	protein of unknown function DUF179	561	675.9	155	-2.12	1	1	1
Amuc_0229	hypothetical protein	495	641.9	72	-3.16	1	1	1
Amuc_1583	hypothetical protein	666	641.8	1	-9.33	1	1	1
Amuc_1715	Na+-dependent transporter-like protein	894	626.6	10	-5.97	1	1	1
Amuc_1124	hypothetical protein	1521	623.2	587	-0.09	1	1	1
Amuc_0611	Phosphoribosyl-AMP cyclohydrolase	489	600.1	771	0.36	5	1	1
Amuc_1440	nitroreductase	645	587.3	26	-4.5	1	1	1
Amuc_0131	hypothetical protein	324	573.1	15	-5.26	1	1	1
Amuc_1759	peptidase M20	1395	571.9	5	-6.84	1	1	1
Amuc_0525	cycloartenol synthase-like protein	1176	562	204	-1.46	1	1	1
Amuc_1106	peptidase M24	1281	535	41	-3.71	1	1	1
Amuc_0997--Amuc_0998	intergenic	206	513.1	451	-0.19	1	1	1
Amuc_1832	L-fucose isomerase	1776	498	32	-3.96	1	1	1
Amuc_2163	Sel1 domain protein repeat-containing protein	2760	479.9	9	-5.74	1	1	1
Amuc_1282	peptidylprolyl isomerase FKBP-type	831	466.6	387.3	-0.27	5	1	1
Amuc_1569	hypothetical protein	519	466.2	66	-2.82	1	1	1
Amuc_0869	conserved hypothetical protein	1188	465	194	-1.26	1	1	1
Amuc_1593	protein of unknown function DUF187	1458	459.2	11	-5.38	1	1	1
Amuc_2119	ATPase associated with various cellular activities AAA_3	1002	447.9	3	-7.22	1	1	1
Amuc_0668	hypothetical protein	1119	442.6	38	-3.54	1	1	1
Amuc_0165	twitching motility protein	1080	432.5	5	-6.43	1	1	1
Amuc_0598--Amuc_0599	intergenic	140	423.2	13	-5.02	1	1	1
Amuc_1253	Glutamate synthase (ferredoxin)	4437	418.8	116	-1.85	1	1	1
Amuc_0035--Amuc_0036	intergenic	595	414.7	27	-3.94	1	1	1
Amuc_1321	alkyl hydroperoxide reductase/ Thiol specific antioxidant/ Mal allergen	621	414.1	9	-5.52	1	1	1
Amuc_1082	iron dependent repressor	405	410	85	-2.27	1	1	1
Amuc_1492	hypothetical protein	477	404.7	70	-2.53	1	1	1
Amuc_2133	hypothetical protein	945	383.3	92	-2.06	1	1	1
Amuc_0812	glucose inhibited division protein A	1884	360.3	709	0.98	0	1	1
Amuc_0237	arsenate reductase and related	357	355.2	5	-6.15	1	1	1
Amuc_1949	Chorismate binding-like protein	1014	344.7	34	-3.34	1	1	1
Amuc_1159	serine/threonine protein kinase	2301	342.9	258	-0.41	1	1	1
Amuc_0431	pyruvate kinase	1419	336.6	25	-3.75	1	1	1
Amuc_1578	pseudouridine synthase	564	320.1	115	-1.48	1	1	1
Amuc_1251	carbamoyl-phosphate synthase, large subunit	3201	311.7	24	-3.7	1	1	1
Amuc_0236	Ion transport 2 domain protein	768	311	20	-3.96	1	1	1
Amuc_1983	methylmalonyl-CoA mutase, large subunit	2142	304.8	5	-5.93	1	1	1
Amuc_1807	aldo/keto reductase	942	295.2	343	0.22	0	1	1
Amuc_0144	binding-protein-dependent transport systems inner membrane component	912	278.1	173	-0.68	1	1	1
Amuc_0942	glycosyl transferase family 11	870	271	36	-2.91	1	1	1
Amuc_1182	sulfatase	1395	262.5	26	-3.34	1	1	1
Amuc_0531	GreA/GreB family elongation factor	1845	259.5	4	-6.02	1	1	1
Amuc_1833	L-fucose transporter	1932	250	199	-0.33	1	1	1
Amuc_0663	recA protein	1038	249.7	24	-3.38	1	1	1
Amuc_0174	hypothetical protein	855	246.6	5	-5.62	1	1	1
Amuc_0242--Amuc_0243	intergenic	200	242.5	25	-3.28	1	1	1
Amuc_0794--Amuc_0795	intergenic	54	242.5	114	-1.09	1	1	1
Amuc_0392	coagulation factor 5/8 type domain protein	2127	241.8	63	-1.94	1	1	1
Amuc_0601	hypothetical protein	633	241.7	4	-5.92	1	1	1
Amuc_0731	hypothetical protein	1038	239.3	25	-3.26	1	1	1
Amuc_1622	hypothetical protein	606	234.5	4	-5.87	1	1	1
Amuc_1804	conserved hypothetical protein	534	233.1	76	-1.62	1	1	1
Amuc_1765	ErfK/YbiS/YcfS/YnhG family protein	855	228.5	4	-5.84	1	1	1
Amuc_1225	Inorganic diphosphatase	1689	218.2	8	-4.77	1	1	1
Amuc_0139	conserved hypothetical protein	978	216	34	-2.67	1	1	1
Amuc_0342	OsmC family protein	405	212.8	3	-6.15	1	1	1
Amuc_0240	twin-arginine translocation protein, TatA/E family subunit	297	205.4	54	-1.93	1	1	1
Amuc_2146	6-pyruvoyl-tetrahydropterin synthase-like protein	450	204.3	4	-5.67	1	1	1
Amuc_1834	hypothetical protein	510	197.5	16	-3.63	1	1	1
Amuc_0701	transcriptional regulator, LysR family	921	196.5	200	0.03	0	1	1
Amuc_0552	Indole-3-glycerol-phosphate synthase	783	193.4	79	-1.29	1	1	1
Amuc_0451	sulfatase	2157	185.5	4	-5.54	1	1	1
Amuc_0730	conserved hypothetical protein	1023	179.1	3	-5.9	1	1	1
Amuc_1752	hypothetical protein	378	175.7	3	-5.87	1	1	1
Amuc_1434	hypothetical protein	978	170.6	6	-4.83	1	1	1
Amuc_0682	OmpA/MotB domain protein	1317	166.1	1	-7.38	1	1	1
Amuc_2106	Malate dehydrogenase (oxaloacetate-decarboxylating) (NADP(+))	1308	164.3	3	-5.78	1	1	1
Amuc_1799	uncharacterized Fe-S center protein, putative ferredoxin	1005	162.3	6	-4.76	1	1	1
Amuc_1296	ABC transporter related	795	152.4	33	-2.21	1	1	1
Amuc_0271	ribosomal protein S16	240	149.9	24	-2.64	1	1	1
Amuc_0976	hypothetical protein	567	140.7	4	-5.14	1	1	1
Amuc_0757	glycosyl transferase family 2	1152	140	58	-1.27	1	1	1
Amuc_0477	hypothetical protein	282	139.1	1	-7.12	1	1	1
Amuc_0029--Amuc_0030	intergenic	23	134	4	-5.07	1	1	1
Amuc_R0031	SRP_RNA	103	132.6	34	-1.96	1	1	1
Amuc_0096--Amuc_0097	intergenic	433	129.7	5	-4.7	1	1	1
Amuc_0511	H+transporting two-sector ATPase C subunit	261	129.6	3	-5.43	1	1	1
Amuc_0395	ribonuclease PH	810	124.4	1	-6.96	1	1	1
Amuc_0894	peptidase membrane zinc metallopeptidase putative	756	121.6	33	-1.88	1	1	1
Amuc_1083	heavy metal translocating P-type ATPase	2094	119.6	188	0.65	0	1	1
Amuc_0512	ATP synthase F0, A subunit	936	116.4	29	-2	1	1	1
Amuc_0832--Amuc_0833	intergenic	269	114.4	2	-5.84	1	1	1
Amuc_1995	Tryptophanase	1461	114.3	1	-6.84	1	1	1
Amuc_1481	6-phosphofructokinase	1077	113.4	17	-2.74	1	1	1
Amuc_1944	6-phosphogluconate dehydrogenase NAD-binding	864	112.2	5	-4.49	1	1	1
Amuc_1394	hypothetical protein	453	110.9	86	-0.37	1	1	1
Amuc_1378	integrase family protein	1248	109.7	14	-2.97	1	1	1
Amuc_0284	hypothetical protein	441	109.1	2	-5.77	1	1	1
Amuc_1528	V-type H(+)-translocating pyrophosphatase	2226	108.8	2	-5.77	1	1	1
Amuc_0883	hypothetical protein	186	108.7	5	-4.44	1	1	1
Amuc_1703	Ferroxidase	492	107.5	9	-3.58	1	1	1
Amuc_0341	hypothetical protein	459	105.4	4	-4.72	2.5	1	1
Amuc_0053	periplasmic solute binding protein	939	104.7	64	-0.71	1	1	1
Amuc_1616	polysaccharide deacetylase	1464	103.6	5	-4.37	1	1	1
Amuc_2022--Amuc_2023	intergenic	233	96	5	-4.26	1	1	1
Amuc_1037	conserved hypothetical protein	201	95.4	3	-4.99	1	1	1
Amuc_0667	3-isopropylmalate dehydratase, small subunit	606	93.2	1	-6.54	1	1	1
Amuc_1244	N-acetylmuramoyl-L-alanine amidase family 2	729	90.3	7	-3.69	1	1	1
Amuc_0176	peptidase S1 and S6 chymotrypsin/Hap	1002	88.7	17	-2.38	1	1	1
Amuc_1741	UTP--glucose-1-phosphate uridylyltransferase	1383	85	64	-0.41	1	1	1
Amuc_0666	3-isopropylmalate dehydratase, large subunit	1410	84.6	5	-4.08	1	1	1
Amuc_0101	hypothetical protein	141	83.4	1	-6.38	1	1	1
Amuc_2077--Amuc_2078	intergenic	127	83.3	1	-6.38	1	1	1
Amuc_1538	OsmC family protein	408	82.4	12	-2.78	1	1	1
Amuc_1951	NADH:flavin oxidoreductase/NADH oxidase	1101	80.9	3	-4.75	1	1	1
Amuc_1588	hypothetical protein	507	76.4	20	-1.93	1	1	1
Amuc_1866	Biopolymer transport protein ExbD/TolR	426	73.8	1	-6.21	1	1	1
Amuc_1631	carboxyl-terminal protease	2244	71.8	2	-5.17	1	1	1
Amuc_1586	type II secretion system protein E	1638	71.2	3	-4.57	1	1	1
Amuc_2176	excinuclease ABC, A subunit	5520	71.1	3	-4.57	1	1	1
Amuc_1222--Amuc_1223	intergenic	108	69.8	15	-2.22	1	1	1
Amuc_1900	hypothetical protein	477	69.4	1	-6.12	1	1	1
Amuc_1472	ribosomal 5S rRNA E-loop binding protein Ctc/L25/TL5	603	67.6	19	-1.83	1	1	1
Amuc_0332	hypothetical protein	447	67.2	2	-5.07	1	1	1
Amuc_1675--Amuc_1676	intergenic	148	65.2	62	-0.07	1	1	1
Amuc_1423	hypothetical protein	1209	64.5	9	-2.84	1	1	1
Amuc_0278	NUDIX hydrolase	720	62.3	3	-4.38	1	1	1
Amuc_R0051--Amuc_1706	intergenic	318	59.5	34	-0.81	1	1	1
Amuc_0509	F0F1-type ATP synthase delta subunit-like protein	405	58	2	-4.86	1	1	1
Amuc_1316--Amuc_1317	intergenic	747	57.8	10	-2.53	1	1	1
Amuc_1331	major facilitator superfamily MFS_1	1317	57.3	1	-5.84	1	1	1
Amuc_1059	acriflavin resistance protein	3156	56.8	1	-5.83	1	1	1
Amuc_0983--Amuc_0984	intergenic	554	54.7	2	-4.77	1	1	1
Amuc_1061	Outer membrane protein-like protein	1278	53.8	4	-3.75	1	1	1
Amuc_0761	acyltransferase 3	2070	52.2	2	-4.71	1	1	1
Amuc_2166	oxidoreductase domain protein	1320	51.6	3	-4.1	1	1	1
Amuc_1054	hypothetical protein	747	51.5	2	-4.69	1	1	1
Amuc_1702	hypothetical protein	159	50.7	3	-4.08	1	1	1
Amuc_1411--Amuc_1412	intergenic	22	50.3	8	-2.65	1	1	1
Amuc_0197--Amuc_0198	intergenic	112	48.4	48	-0.01	1	1	1
Amuc_2116	Alcohol dehydrogenase zinc-binding domain protein	1119	47.4	7	-2.76	1	1	1
Amuc_0506	ATP synthase F1, beta subunit	1419	47.2	4	-3.56	1	1	1
Amuc_1830	L-fuculokinase	1422	40.8	2	-4.35	1	1	1
Amuc_0409	putative substrate-binding protein of aliphatic sulfonate ABC transporter	1044	39.4	1	-5.3	1	1	1
Amuc_0690--Amuc_0691	intergenic	223	38.9	40	0.04	0	1	1
Amuc_1797	conserved hypothetical protein	870	38.1	2	-4.25	1	1	1
Amuc_0036--Amuc_0037	intergenic	493	37.8	3	-3.65	1	1	1
Amuc_2086	hypothetical protein	1137	34.1	3	-3.5	1	1	1
Amuc_1620	outer membrane autotransporter barrel domain protein	3162	28.7	4	-2.84	1	1	1
Amuc_0841	argininosuccinate lyase	1374	19.7	1	-4.3	1	1	1
Amuc_0945	glycosyl transferase family 2	1074	17	4	-2.09	1	1	1
Amuc_1119	hypothetical protein	1155	14.5	1	-3.86	1	1	1
Amuc_0913	ATP/cobalamin adenosyltransferase	555	12.4	1	-3.63	1	1	1
Amuc_2158	NADH dehydrogenase (ubiquinone) 30 kDa subunit	582	11.8	1	-3.56	1	1	1
Amuc_1986	hypothetical protein	651	3.5	1	-1.8	1	1	1
Amuc_0947	biotin/lipoyl attachment domain-containing protein	1038	1.5	1	-0.62	1	1	1
Amuc_0769--Amuc_0770	intergenic	287	1	1	0	0	1	1
Amuc_0991	hypothetical protein	738	1	1	0	0	1	1
Amuc_2015	thiamine-phosphate pyrophosphorylase	612	1	1	0	0	1	1

## Sheet: INSeq mice
INSeq analysis in mice
INSeq analysis of genes required for colonization of the GI tract. Log2 fold changes in input versus output populations were determined with TRANSIT.
ID	Mucin	MMPval	GFcecum	GFcPval	ASF	ASFPval	SPFcecum	SPFcPval	Muc2	Muc2Pval
Amuc_0017	1.61	0.54029	3.26	0.28884	1.8	0.45325	-0.18	0.56234	-4.12	0.28884
Amuc_0020	-0.99	0.54029	-0.55	0.72367	-3.05	0.2113	-2.27	0.1475	-5.47	0.28884
Amuc_0029	-6.59	0.54029	-15.69	0.23568	-13.32	0.11899	-13.05	0.14466	-9.97	0.2765
Amuc_0036	-0.49	0.79891	-0.49	0.36936	-3.88	0.00948	-8.79	0.00017	-9.31	0.00106
Amuc_0037	0.17	0.54029	1.01	0.72367	1.38	0.45325	0.66	0.77206	-5.19	0.28884
Amuc_0044	-1.99	0.24716	-1.13	0.23999	-4.82	0.03576	-8.11	0.0246	-10.04	0.05019
Amuc_0052	-0.65	0.24716	-5.8	0.04949	-6.8	0.03576	-11.91	0.00315	-12.35	0.02677
Amuc_0053	-0.23	0.54029	-3.51	0.28884	-1.91	0.2113	-3.16	0.1475	-5.8	0.23568
Amuc_0059	-5.66	0.10519	-12.96	0.0367	-10.35	0.03138	-0.23	0.22767	4.67	0.35931
Amuc_0065	-5.36	0.10519	-10.06	0.03605	-9.56	0.0199	-1.56	0.04755	0.69	0.69173
Amuc_0066	-1.61	0.24528	-3.53	0.09664	-4.54	0.09715	-9.36	0.00383	-10.51	0.00751
Amuc_0077	-2.25	0.10519	-11.93	0.05019	-12.16	0.03576	-6.17	0.0246	-5.12	0.05019
Amuc_0088	-1.87	0.81696	-8.26	0.05019	-6.87	0.03576	-12.78	0.00981	-13.95	0.04265
Amuc_0096	-2.06	0.54029	-8.75	0.28884	-8.19	0.2113	-10.39	0.14037	-13.04	0.23568
Amuc_0101	-1.7	0.54029	-3.75	0.28884	-3.43	0.2113	-5.89	0.10628	-6.62	0.23568
Amuc_0109	1.96	0.89728	2.56	0.42728	1.37	0.33969	-0.13	0.20796	-3.2	0.12929
Amuc_0121	-0.15	0.48745	-0.39	0.36077	-0.85	0.1709	0.41	0.794	-1.31	0.14972
Amuc_0126	-2.98	0.15558	-2.35	0.0712	-4.91	0.01818	-9.73	0.0047	-10.92	0.00751
Amuc_0127	-2.94	0.54029	-2.71	0.28884	-4.34	0.2113	-5.12	0.14679	-9.67	0.2765
Amuc_0131	-6.11	0.54029	-11.56	0.23568	-10.15	0.16784	-1.52	0.23818	0.55	0.72367
Amuc_0139	-1	0.54029	-4.59	0.28884	-4.54	0.2113	-9.74	0.05728	-8.91	0.23568
Amuc_0144	0.44	0.54029	-4.94	0.28884	-2.38	0.2113	-9.71	0.12208	-9.18	0.2765
Amuc_0147	0.19	0.89728	1.03	0.42728	-0.58	0.65108	-0.05	0.90886	-4.76	0.01684
Amuc_0152	-2.53	0.10519	-7.9	0.04673	-7.5	0.03335	-9.97	0.00156	-7.82	0.02677
Amuc_0154	-2.47	0.54029	-5.64	0.28884	-7.67	0.2113	-7.13	0.1475	-3.35	0.28884
Amuc_0165	-6.58	0.54029	-12.34	0.23568	-10.11	0.11899	-12.95	0.02596	-10.7	0.23568
Amuc_0166	-6.54	0.10519	-10.5	0.02677	-10.21	0.00843	-11.26	0.00156	-10.12	0.02677
Amuc_0168	1.23	0.54029	-4.73	0.28884	-4.12	0.2113	-10.52	0.14037	-10.1	0.2765
Amuc_0172	-6.12	0.00847	-9.05	0.0014	-6.64	0.00085	-3.46	0.00146	-2.1	0.0086
Amuc_0174	-6.76	0.54029	-11.3	0.23568	-9.78	0.11899	-12.09	0.02596	-12.08	0.23568
Amuc_0175	-1.23	0.69854	-3.16	0.12963	-3.74	0.07861	-3.62	0.02559	-9.6	0.01147
Amuc_0176	-1.08	0.54029	-2.05	0.28884	-2.67	0.2113	-2.44	0.1475	-5.29	0.2765
Amuc_0196	-2.26	0.48745	-2.25	0.08965	-3.05	0.03536	-5.1	0.02108	-7.4	0.04265
Amuc_0215	-3.2	0.48745	3.6	0.6953	-3	0.3153	-2.34	0.27236	-9.18	0.14972
Amuc_0229	-0.17	0.54029	-0.31	0.72367	0.13	0.80259	0.95	1	-4.9	0.28884
Amuc_0235	-2.36	0.36712	-10.29	1e-06	-7.53	1e-06	-9.05	1e-06	-6.37	1e-06
Amuc_0236	-1.14	0.54029	-4.39	0.28884	-4.56	0.2113	-8.04	0.10628	-9.35	0.23568
Amuc_0237	-0.49	0.54029	-1.66	0.28884	-0.61	0.45325	-3.8	0.1475	-7.2	0.2765
Amuc_0240	-4.19	0.54029	-8.32	0.28884	-9.44	0.11899	-11.35	0.02596	-9.73	0.23568
Amuc_0241	-1.81	0.54029	-5.89	0.28884	-5.5	0.2113	-9.91	0.13313	-7.67	0.28884
Amuc_0242	0.75	0.02819	0.5	0.82859	1.06	0.80161	-3.89	0.00504	-13.27	0.0042
Amuc_0246	-4.28	0.54029	-5.16	0.28884	-5.01	0.2113	-10.68	0.10628	-10.78	0.23568
Amuc_0253	-4.58	0.54029	-13.05	0.28884	-11.5	0.2113	-14.5	0.08481	-13.11	0.2765
Amuc_0260	-5.62	0.54029	-14.58	0.23568	-10.89	0.16784	-10.35	0.14466	-9.67	0.23568
Amuc_0267	-1.09	0.48745	-6.89	0.04949	-8.26	0.03556	-13.18	0.01436	-13.46	0.04265
Amuc_0271	-0.12	0.54029	-2.58	0.28884	-5.45	0.19457	-6.54	0.13313	-8.09	0.23568
Amuc_0274	-6.57	0.10519	-11.72	0.02677	-8.32	0.02495	-10.12	0.00315	-7.32	0.04265
AMUC_RS01570	-3.21	0.89728	-3.3	0.82859	-4.45	0.72502	-7.26	0.05697	-9.28	0.01825
Amuc_0278	-2.41	0.54029	-6.24	0.2765	-7.52	0.11899	-10.18	0.02596	-8.36	0.23568
Amuc_0283	1.38	0.48745	-4.01	0.15096	-4.94	0.08284	-6.31	0.02108	-10.69	0.02736
Amuc_0284	-2.98	0.54029	-2.45	0.28884	-3.4	0.2113	-6.72	0.14037	-7.16	0.23568
AMUC_RS01655	-4.61	0.05281	-12.12	0.0042	-8.47	0.00479	-11.85	0.00022	-11.5	0.00751
Amuc_0292	0.63	0.54029	0.02	0.72367	-0.94	0.45325	-0.23	0.38482	-2.68	0.28884
Amuc_0328	-1.06	0.54029	-3.81	0.28884	-4.55	0.2113	-10.32	0.08481	-10.54	0.23568
Amuc_0332	-1.91	0.54029	-5.94	0.2765	-6	0.2072	-0.52	0.35358	3.03	0.28884
Amuc_0334	0.27	0.81696	-3.1	0.08965	-0.94	0.52236	-4.91	0.01438	-7.93	0.02677
Amuc_0335	-1.7	0.81696	-6.48	0.05019	-4.89	0.03576	-9.9	0.02411	-10.87	0.04742
Amuc_0336	-0.52	0.89769	-8.22	1e-06	-10.09	1e-06	-9.2	1e-06	-11.98	1e-06
Amuc_0337	-5.92	0.54029	-9.64	0.28884	-11	0.2113	-12.71	0.10628	-11.22	0.2765
Amuc_0341	-0.12	1	-7.69	0.55477	-7.61	0.35949	-10.54	0.00054	-9.1	0.41974
Amuc_0342	-2.42	0.54029	-0.56	0.72367	-2.25	0.2113	-5.38	0.1475	-4.62	0.2765
Amuc_0343	-6.58	0.10519	-11.89	0.02736	-9.94	0.01426	-12.59	0.00054	-10.26	0.02677
Amuc_0347	-1.41	0.95117	0.21	0.51867	-0.9	0.40936	-0.92	0.03687	-0.51	0.01053
Amuc_0354	-5.82	0.54029	-12.58	0.23568	-10.17	0.16784	-13.78	0.02596	-10.86	0.23568
Amuc_0355	1.87	0.10519	-6.74	0.05019	-6.56	0.03576	-12.12	0.01971	-16.48	0.02677
Amuc_0356	-0.76	0.95117	-8.49	0.00077	-6.77	0.00044	-12.67	0.00016	-15.02	0.00034
Amuc_0359	1.17	0.48745	-10.48	0.04742	-7.32	0.03536	-4.15	0.02642	-2.76	0.23423
AMUC_RS02010	0.78	0.81487	-10.86	0.0007	-9.04	0.00157	-13.35	1e-06	-14.13	0.00014
Amuc_0362	1.42	0.54029	-6.8	0.28884	-5.33	0.2113	-6.06	0.14679	-11.01	0.2765
Amuc_0371	-0.15	0.54029	-10.59	0.28884	-7.51	0.2113	-10.69	0.10628	-11.32	0.2765
Amuc_0372	-0.6	0.55221	-1.17	0.14303	-2.29	0.08189	-1.31	0.03756	-5.05	0.00289
Amuc_0380	-0.98	0.54029	-3.38	0.28884	-4.27	0.2113	-10.93	0.14679	-12.19	0.2765
Amuc_0384	-1.24	0.81696	-3.91	0.36077	-4.76	0.3153	-7.01	0.02473	-9.48	0.05019
Amuc_0385	-1.01	0.54029	1.1	0.28884	-0.27	0.45325	-0.5	0.56234	-5.01	0.28884
Amuc_0386	-0.65	0.54029	-3.5	0.28884	-3.44	0.2113	-8.61	0.1475	-12.72	0.28884
Amuc_0392	1.51	0.54029	3.57	0.28884	3.08	0.2113	-0.02	0.77206	-3.73	0.28884
Amuc_0394	-6.65	0.0508	-15.09	0.00177	-13.47	0.00173	-15.56	0.00027	-14.9	0.00179
Amuc_0395	-6.8	0.54029	-11.08	0.23568	-9.87	0.11899	-6.83	0.10628	-8.34	0.23568
Amuc_0409	-1.97	0.54029	-1.65	0.72367	-2.94	0.2113	-3.78	0.14679	-6.02	0.23568
Amuc_0419	-1.53	0.54029	-4.34	0.28884	-6.35	0.2113	-9.5	0.1475	-10.27	0.28884
Amuc_0428	-1.1	0.75946	-1.14	0.16339	-3.45	0.06915	-5.22	0.00047	-9.42	0.00027
Amuc_0431	0.65	0.54029	1.6	0.28884	1.93	0.2113	2.17	1	-4.13	0.28884
Amuc_0435	-0.51	0.81487	0.69	0.58617	-2.73	0.03523	-2.42	0.00069	-9.8	0.00016
Amuc_0446	0.43	0.79891	-3.73	0.04212	-3.01	0.02351	-6.15	0.00259	-5.16	0.00438
Amuc_0447	-3.09	0.07575	-8.77	0.00158	-8.4	0.00322	-13.85	0.0002	-14.55	0.00044
Amuc_0448	-1.74	0.55221	-4.63	0.0422	-4.86	0.02351	-7.37	0.00382	-6.18	0.01183
Amuc_0451	-1.93	0.54029	-2.87	0.28884	-3.72	0.2113	-5.49	0.1475	-5.98	0.2765
Amuc_0452	-1.8	0.54029	-3.29	0.28884	-2.58	0.2113	-2.69	0.1475	-7.97	0.28884
Amuc_0456	-2.54	1	-4	0.51261	-3.38	0.85353	-6.4	0.0627	-6.18	0.41974
Amuc_0459	1.27	0.54029	5.35	0.28884	8.27	0.2113	7	0.1475	9.11	0.28884
Amuc_0460	3.06	0.54029	2.74	0.72367	7.53	0.2113	5.93	0.1475	6.96	0.28884
Amuc_0461	-1.93	0.48745	-5.28	0.35487	-3.22	0.31477	-7.63	0.17539	-9.4	0.14598
Amuc_0473	1.16	0.10519	1.89	0.15096	0.11	0.92726	1.78	0.19169	-2.63	0.23999
AMUC_RS02620	-1.61	0.54029	-1.78	0.28884	-2.45	0.2113	-6	0.1475	-8.45	0.23568
Amuc_0506	-0.1	0.54029	-5.38	0.28884	-4.53	0.2072	-7.43	0.08481	-5.46	0.23568
Amuc_0508	1.52	0.55221	-2.82	0.02616	-4.51	0.00424	-6.15	0.00107	-9.28	0.00106
Amuc_0509	-1.5	0.54029	-8.58	0.23568	-7.7	0.16784	-5.58	0.12208	-5.6	0.23568
Amuc_0511	-3.6	0.54029	-8.39	0.2765	-9.68	0.11899	-9.53	0.05728	-7.44	0.23568
AMUC_RS02805	-0.3	0.54029	-4.4	0.28884	-5	0.2072	-4.8	0.13313	-8.68	0.23568
Amuc_0513	-0.69	0.93314	0.2	0.71857	-0.32	0.56947	-1.74	0.05056	-6.44	1e-05
Amuc_0524	0.78	0.81696	0.76	0.36077	1.1	0.3153	-0.09	0.43342	-5.15	0.04949
Amuc_0525	-3.31	0.54029	-5.95	0.28884	-5.52	0.2113	-10.74	0.08481	-10.67	0.23568
Amuc_0531	-1.7	0.54029	-10.45	0.23568	-6.06	0.16784	-11.85	0.02596	-7.79	0.23568
Amuc_0536	0.38	0.48745	0.64	0.89612	-0.03	0.3153	1.37	0.56566	-2.35	0.23999
Amuc_0537	-0.24	0.88827	0.11	0.73611	-1.6	0.37852	1.56	0.42095	-2.07	0.00883
Amuc_0543	-6.66	0.02819	-13.79	0.00769	-12.9	0.00551	-10.88	0.00239	-13.85	0.00751
Amuc_0544	-6.71	1e-06	-13.26	1e-06	-12.98	1e-06	-8.99	1e-06	-8.4	1e-06
Amuc_0546	-6.59	0.10519	-12.14	0.02677	-10.18	0.0199	-12.3	0.00156	-11.25	0.02677
Amuc_0548	-6.3	0.54029	-12.75	0.23568	-11	0.16784	-13.14	0.05728	-9.78	0.23568
Amuc_0552	-0.23	0.54029	-0.06	0.72367	-1.29	0.45325	-1.64	0.24657	-5.06	0.2765
Amuc_0559	-5.05	0.10021	-9.09	0.02677	-6.54	0.00843	-9.13	0.00054	-6.17	0.02677
Amuc_0572	-1.68	0.54029	-6.09	0.28884	-5.32	0.2113	-9.79	0.14679	-11.68	0.2765
Amuc_0573	-2.94	0.54029	-8.76	0.28884	-9.63	0.2113	-15.05	0.02596	-14.12	0.23568
Amuc_0576	0.5	0.73814	-7.02	1e-05	-8.78	1e-06	-8.85	1e-06	-13.05	1e-06
Amuc_0581	-0.14	0.67113	0.83	0.14303	-3.24	0.02351	-3.35	0.01049	-8.13	0.00322
Amuc_0584	0.53	0.81696	0.81	0.51389	-1.72	0.08284	2.47	0.63835	-6.37	0.05019
Amuc_0586	-1.57	0.54029	-4.51	0.28884	-4.59	0.2113	-8.68	0.12208	-9	0.2765
Amuc_0601	-3.89	0.54029	-7.43	0.28884	-9.27	0.16784	-12.04	0.02596	-8.9	0.23568
Amuc_0611	-0.11	0.89728	-8.89	0.01067	-11.29	0.00148	-12.93	2e-05	-8.19	0.0042
Amuc_0615	-2.77	0.0263	-5.78	1e-06	-10.54	1e-06	-11.69	1e-06	-13.12	1e-06
Amuc_0625	-0.1	0.89728	0.56	0.82859	-0.22	0.1747	0.15	0.08594	-3.6	0.01125
Amuc_0663	-1.51	0.54029	-8.08	0.28884	-2.2	0.2113	-9.25	0.10628	-9.66	0.23568
Amuc_0666	-5.48	0.54029	-9.41	0.23568	-8.91	0.11899	-10.42	0.02596	-6.86	0.23568
Amuc_0667	-7.92	0.54029	-10.09	0.23568	-9.7	0.11899	-10.71	0.02596	-7.55	0.23568
Amuc_0668	-1.05	0.54029	-3.93	0.28884	-3.53	0.2113	-1.34	0.24657	-9.5	0.2765
AMUC_RS03635	-1.4	0.48745	-3	0.15096	-5.19	0.03576	-10.85	0.01214	-12.43	0.02677
Amuc_0670	-0.52	0.66817	-0.53	0.11031	-3.08	0.01009	-7.7	0.00027	-13.42	0.00034
Amuc_0671	-1.49	0.54029	-5.74	0.28884	-5.21	0.2113	-9.56	0.12208	-9.21	0.23568
Amuc_0682	-3.61	0.54029	-9.83	0.23568	-6.63	0.19457	-11.1	0.02596	-8.37	0.23568
Amuc_0684	-1.79	0.48745	-1.9	0.23999	-3.21	0.05523	-5.52	0.0247	-9.24	0.04742
Amuc_0686	-6.47	0.54029	-14.9	0.2765	-12.76	0.2113	-15.03	0.12208	-13.59	0.28884
Amuc_0687	-0.34	0.89728	1.33	0.61343	-0.37	0.58042	-1.18	0.22938	-4.06	0.01391
Amuc_0688	1.67	0.81696	3.78	0.89612	1.68	0.92726	6.06	0.794	-0.6	0.51389
Amuc_0690	-2.62	0.10519	-0.27	0.23423	-2.87	0.03375	-3.16	0.03644	-5.52	0.04333
Amuc_0694	-1.07	0.89728	-4.04	0.12963	-3.22	0.58042	-5.4	0.02134	-10.2	0.01003
Amuc_0701	0.9	0.54029	2.32	0.28884	1.63	0.80259	0.19	0.77206	-3.88	0.28884
Amuc_0711	2.05	0.54029	-6.09	0.28884	-6.87	0.2113	-8.06	0.1475	-12.1	0.2765
Amuc_0722	-1.3	0.54029	-3.79	0.28884	-5.43	0.2113	-3.8	0.1475	-2.01	0.28884
Amuc_0730	-2.61	0.54029	-4.99	0.28884	-6.26	0.2113	-0.39	0.35358	4.09	0.28884
Amuc_0731	-4.48	0.54029	-11.9	0.23568	-10.47	0.11899	-13.2	0.02596	-12	0.23568
Amuc_0739	-5.84	0.10519	-8.01	0.04742	-8.68	0.03375	-6.71	0.02916	-10.94	0.04265
Amuc_0745	-5.5	0.10519	-6.98	0.04742	-5.37	0.07946	-2.1	0.06046	-3.27	0.14598
Amuc_0747	-6.44	0.02819	-4.36	0.02527	-8.16	0.00772	-1.98	0.42295	-3.57	0.05052
Amuc_0757	-2.43	0.54029	-8.22	0.2765	-3.82	0.2113	-2.77	0.1475	-6.76	0.23568
Amuc_0761	-6.07	0.54029	-8.38	0.23568	-7.99	0.11899	-9.62	0.02596	-6.48	0.23568
Amuc_0775	-3.33	0.10519	-4.62	0.05019	-4.75	0.03495	-2.8	0.04013	-3.98	0.0367
Amuc_0783	-3.04	0.54029	-13.45	0.23568	-10.89	0.19457	-12.66	0.08481	-10.56	0.23568
Amuc_0785	-5.65	0.00052	-11.22	2e-05	-10.78	1e-06	-13.23	1e-06	-11.08	1e-05
Amuc_0789	-0.12	0.84307	-3.43	0.03382	-4.55	0.01269	-3.99	0.001	-6.28	2e-05
Amuc_0794	-1.5	0.48745	-1.43	0.36077	-2.75	0.3153	-8.45	0.02411	-6.34	0.05019
Amuc_0809	-6.23	0.00168	-10.17	0.00013	-9.94	1e-05	-12.72	1e-06	-10.63	4e-05
Amuc_0812	0.09	0.54029	-12	0.23568	-7.34	0.2072	-10.33	0.05728	-11.23	0.23568
Amuc_0815	1.05	0.97024	0.36	0.27446	-2.38	0.08389	-0.96	0.03374	-5.6	0.00072
Amuc_0820	0.31	0.81696	1.21	0.89612	1.09	0.78419	1.08	0.79396	-0.47	0.15096
Amuc_0821	-2.89	0.48745	-7.89	0.04742	-5.58	0.22486	-6.58	0.06046	-11.26	0.04742
Amuc_0824	1.32	0.48385	-2.71	0.03508	-2.65	0.00313	-6.13	1e-06	-8.73	1e-06
Amuc_0833	0.63	0.4447	5.49	0.74086	0.35	0.62244	-1.95	0.04564	-5.41	0.00395
Amuc_0834	-1.15	0.6906	-1.1	0.87906	-1.93	0.36733	-2.5	0.01194	-6	0.00016
Amuc_0836	-1.11	0.54267	-1.23	0.45218	-3.91	0.18951	1.12	0.00565	-10.41	0.00019
Amuc_0840	-3.31	0.24528	-8.91	0.17031	-7.63	0.14503	-10.84	0.02049	-8.8	0.12826
Amuc_0841	-5.64	0.54029	-8.31	0.23568	-4.52	0.16784	-8.51	0.02596	-5.93	0.23568
AMUC_RS04650	-1.72	0.54029	-4.65	0.28884	-5.07	0.2113	-8.62	0.1475	-9.79	0.28884
Amuc_0863	0.67	0.54029	-4.08	0.28884	-7.64	0.2113	-7.09	0.1475	-12.16	0.28884
Amuc_0865	-1.39	0.54029	-3.83	0.28884	-4.82	0.2113	-8.38	0.13313	-11.44	0.23568
Amuc_0866	-3.1	0.51861	-4.79	0.09694	-6.77	0.05002	-7.31	0.00842	-10.99	0.00902
Amuc_0867	-1.81	0.48745	-1.65	0.14972	-3.57	0.03375	-0.58	0.255	-3.23	0.14598
Amuc_0869	0.39	0.54029	-6.13	0.28884	-6.79	0.2113	-13.27	0.02596	-12.02	0.23568
Amuc_0871	-1.49	0.14884	-0.29	0.14303	-1.02	0.03861	0.45	0.0828	-4.1	0.00438
Amuc_0872	0.28	0.54029	-5.97	0.28884	-2.65	0.2113	-9.63	0.14037	-12.96	0.2765
Amuc_0882	-0.57	0.48745	3.85	0.89612	-0.54	0.41131	0.47	0.4972	-4.85	0.36077
Amuc_0883	-1.1	0.54029	-1.51	0.28884	-1.98	0.2113	-3.41	0.1475	-6.77	0.2765
Amuc_0894	0.13	0.54029	1.16	0.28884	-1.12	0.2113	-0.77	0.24657	-3.25	0.2765
Amuc_0895	-1.55	0.55221	-3.19	0.11897	-3.66	0.06133	-4.8	0.00844	-2.23	0.03113
Amuc_0906	-1.59	0.54029	-4.18	0.28884	-2.43	0.2113	-8.51	0.14679	-13.74	0.23568
Amuc_0913	-3.48	0.54029	-6.44	0.23568	-5.43	0.11899	-6.23	0.02596	-4.23	0.23568
Amuc_0938	-0.82	0.10519	-4.57	0.05019	-2.8	0.03576	-7.89	0.01638	-7.62	0.03605
Amuc_0939	-0.15	0.54029	-9.44	0.28884	-9.17	0.2113	-10.56	0.10628	-13.04	0.23568
Amuc_0942	0.95	0.54029	-5.44	0.28884	-7.25	0.2113	-9.43	0.13313	-12.79	0.23568
Amuc_0944	0.56	0.81696	-4.24	0.05019	-5.65	0.03576	-8.73	0.02408	-11.39	0.0367
Amuc_0945	0.5	0.54029	-1.67	0.28884	-2.47	0.2072	-1.59	0.24657	-4.63	0.2765
Amuc_0946	-0.37	0.69854	1.1	0.516	0.73	0.58042	0.3	0.33023	-2.47	0.0347
Amuc_0952	0.2	0.81487	-1.69	0.06568	-2.93	0.01381	3.06	0.01186	-6.01	0.00076
Amuc_0965	-2	0.54029	-15.03	0.23568	-9.19	0.2072	-10.54	0.13313	-10.41	0.28884
Amuc_0967	-0.85	0.69854	-3.73	0.34771	-7.52	0.01319	-6.64	0.04288	-11.36	0.0329
Amuc_0969	0.5	0.48745	-10.89	0.04742	-9.72	0.03556	-12.25	0.01974	-13.98	0.04198
Amuc_0970	-4.07	0.54029	-11.96	0.23568	-9.62	0.2072	-14.77	0.02596	-13.59	0.23568
Amuc_0976	-1.09	0.54029	-0.6	0.28884	-1	0.45325	0.84	1	-2.05	0.2765
Amuc_0999	-2.5	0.81696	-3.55	0.6953	-7.19	0.0825	-9.5	0.02105	-12.71	0.03605
Amuc_1008	-1.03	0.54029	-4.43	0.28884	-5.28	0.2113	-9.9	0.14037	-13.9	0.23568
Amuc_1025	-0.71	0.54267	-5.26	0.00143	-4.18	0.01682	-4.8	8e-05	-9.28	0.00011
Amuc_1028	-1.2	0.89728	-2.26	0.34814	-4.06	0.39295	-5.46	0.04515	-7.17	0.01724
Amuc_1032	1.05	0.54029	2.38	0.28884	0.97	0.45325	1.87	0.1475	-2.58	0.28884
Amuc_1036	-0.19	0.81696	-5.44	0.36077	-7.37	0.23533	-8.53	0.02215	-12.21	0.04265
Amuc_1037	-1.49	0.54029	-1.69	0.28884	-1.05	0.45325	-1.8	0.24657	-4.38	0.2765
Amuc_1039	0.32	0.25726	4.39	0.00021	3.44	0.00684	2.09	0.01343	-2.61	0.0129
Amuc_1052	0.16	0.81696	0.97	0.89485	-1.1	0.16138	0.09	0.31208	-2.44	0.07992
Amuc_1054	-5.11	0.54029	-8.96	0.23568	-5.57	0.11899	-9.59	0.02596	-5.54	0.2765
Amuc_1055	-5.53	0.54029	-10.67	0.2765	-7.08	0.2113	-13.66	0.05728	-9.82	0.23568
Amuc_1056	-3.92	0.24528	-10.73	0.01103	-11.35	0.00396	-13.67	0.00058	-13.42	0.00594
Amuc_1057	1.66	0.54029	1.48	0.28884	0.33	0.80259	1.95	0.24657	-5.58	0.28884
Amuc_1059	-1.88	0.54029	-3.6	0.28884	-3.85	0.2113	-3.3	0.14037	-6.43	0.2765
Amuc_1060	-1.89	0.24528	-2.45	0.02527	-3.62	0.01377	-1.99	0.02527	-8.81	0.00902
Amuc_1061	-3.38	0.54029	-4.32	0.28884	-4.46	0.2072	-2.61	0.10628	-7.15	0.23568
Amuc_1069	-1.17	0.55221	-5.37	0.09821	-6.8	0.06129	-9.19	0.00234	-11.67	0.00289
Amuc_1074	-0.66	0.5758	-2.77	0.25676	-4.2	0.08913	-4.32	0.00397	-7.54	0.00041
Amuc_1082	-0.03	0.54029	0.31	0.72367	1.12	0.80259	2.03	0.38482	0.59	0.72367
Amuc_1083	0.6	0.54029	-5.82	0.28884	-7.01	0.16784	-8.02	0.08481	-9.89	0.23568
Amuc_1091	0.95	0.69854	-5.66	0.06842	-6.62	0.02438	-5.55	0.00686	-12.92	0.00769
Amuc_1100	-7.85	0.54029	-11.25	0.23568	-9.48	0.11899	-11.83	0.05728	-10.92	0.23568
Amuc_1101	-7.17	0.00068	-13.42	1e-05	-11.93	1e-05	-13.58	1e-06	-13.05	2e-05
Amuc_1102	-6.92	0.00088	-13.81	0.00012	-12.67	3e-05	-11.57	1e-05	-12.01	0.00011
Amuc_1105	-6.56	0.10519	-11.06	0.03605	-9.39	0.0199	-12.78	0.00054	-11	0.02677
Amuc_1106	-3.11	0.54029	-6.75	0.28884	-5.54	0.2113	-8.38	0.08481	-10.41	0.23568
Amuc_1107	0.57	0.54029	-10.65	0.2765	-9.05	0.16784	-12.97	0.02596	-9.52	0.23568
Amuc_1112	-6.9	0.54029	-14.98	0.28884	-12.25	0.2113	-8.67	0.14679	-13.88	0.2765
Amuc_1119	-0.65	0.54029	-2	0.28884	-1.56	0.2072	-1.76	0.16797	-4.01	0.23568
Amuc_1120	-6.49	0.00847	-3.2	0.0335	-4.64	0.00429	-7.78	0.00098	-13.64	0.00074
Amuc_1123	0.08	0.93232	0.08	0.60327	-0.92	0.17828	1.39	0.23118	-7.14	0.00317
Amuc_1124	1.3	0.54029	-5.08	0.28884	-7.28	0.2113	-10.34	0.10628	-14.81	0.23568
Amuc_1125	-6.84	0.10519	-11.89	0.02736	-9.5	0.01441	-8.92	0.01217	-7.92	0.04265
Amuc_1126	-1.26	0.81696	-2.27	0.15096	-4.7	0.03576	-2.22	0.10539	-1.04	0.35487
Amuc_1128	1.44	0.54029	1.45	0.28884	-0.7	0.45325	0.23	0.56234	-4.6	0.28884
Amuc_1159	-0.14	0.54029	-6.74	0.28884	-4.83	0.2113	-6.63	0.14037	-10.49	0.23568
Amuc_1179	-1.92	0.89728	1.89	0.516	-4.55	0.14503	-6.24	0.0342	-13.4	0.0101
AMUC_RS06310	0.93	0.54029	-5.48	0.28884	-7.7	0.2072	-11.86	0.02596	-11.83	0.23568
Amuc_1184	-0.69	0.89728	-0.4	0.61343	-1.8	0.06298	-0.9	0.27682	-4.99	0.0101
AMUC_RS06325	-1.29	0.54029	-2.47	0.28884	-3.48	0.2113	-5.34	0.1475	-7.71	0.28884
Amuc_1189	0.55	0.54029	-8.53	0.28884	-6.57	0.2113	-12.87	0.1475	-14.89	0.2765
Amuc_1190	-4.82	0.02819	-11.18	0.00594	-6.79	0.00772	-6.58	0.0011	-8.71	0.00594
Amuc_1197	2.93	0.54029	1.73	0.72367	4.61	0.2113	-8.53	0.1475	-10.51	0.28884
Amuc_1205	0.47	0.54029	-6.55	0.28884	-4.97	0.2113	-8.5	0.13313	-11.34	0.23568
Amuc_1209	-2.7	0.81696	-9.45	0.05019	-7.81	0.03576	-12.26	0.02442	-12.88	0.04949
Amuc_1213	1.24	0.79891	2.68	0.74076	2.05	0.449	1.19	0.33546	-3.75	0.01672
Amuc_1225	-2.86	0.54029	-5.51	0.28884	-4.64	0.2113	-9.74	0.05728	-9.67	0.23568
Amuc_1227	0.49	0.81696	-7.64	0.04949	-7.59	0.03177	-10.56	0.00981	-9.3	0.02677
Amuc_1229	-6.35	0.48745	-13.67	0.0367	-11.82	0.03177	-12.91	0.01974	-13.16	0.04949
Amuc_1230	-6.43	0.54029	-14.79	0.2765	-14.43	0.2072	-15.18	0.14037	-15.65	0.2765
Amuc_1244	0.01	0.54029	-0.27	0.72367	0.08	0.45325	-2.39	0.1475	-6.92	0.28884
Amuc_1246	-6.16	5e-05	-1.26	0.00281	-4.33	0.00023	-4.14	7e-05	-7.45	1e-06
Amuc_1251	-2.99	0.54029	-4.35	0.28884	-4.41	0.2113	-10.35	0.05728	-10.97	0.23568
Amuc_1253	0.52	0.54029	-9.5	0.2765	-7.21	0.2113	-12.87	0.02596	-12.56	0.23568
Amuc_1258	-1.27	0.35024	-3.55	0.06539	-5.24	0.02349	-8.17	0.00112	-12.74	0.00144
AMUC_RS06785	-1.6	0.58154	-3.06	0.39577	-4.15	0.08523	-6.7	0.01192	-5.24	0.0213
Amuc_1268	-1.28	0.54029	-3.91	0.28884	-4.26	0.2113	-9.55	0.1475	-11.62	0.28884
AMUC_RS06870	0.98	0.24528	0.15	0.71822	0.94	0.80136	-1.94	0.02134	-4.84	0.01081
Amuc_1283	-0.75	0.22734	-0.43	2e-05	-1.23	1e-06	-1.97	1e-06	-8.35	1e-06
Amuc_1295	-4.64	0.02688	-5.2	0.02462	-4.31	0.00977	-3.73	0.01253	-6.6	0.0042
Amuc_1296	-3.79	0.54029	-1.51	0.28884	-0.08	0.80259	1.09	0.56234	-3.74	0.2765
Amuc_1297	-4.24	0.10519	-1.49	0.14598	-0.19	0.40611	-0.42	0.36182	-5.47	0.04742
AMUC_RS06945	-3.82	0.24528	-1.46	0.42728	-1.54	0.33953	-0.71	0.21536	-5.4	0.02722
Amuc_1299	-2.87	0.10519	-1.12	0.36077	-0.44	0.3153	0.39	0.71469	-4.52	0.04333
Amuc_1300	-2.01	0.48745	1.32	0.89612	2.9	0.78419	1.76	0.95835	-0.53	0.51261
Amuc_1301	-2.62	0.02186	-0.09	0.47852	1.1	0.92155	0.41	0.66692	-3.42	0.00473
Amuc_1309	-2.78	0.54029	-11.32	0.28884	-8.19	0.2113	-12.31	0.12208	-15	0.23568
Amuc_1312	-0.31	0.81696	-1.61	0.15096	-2.25	0.08149	-3.68	0.02108	-10.44	0.03605
Amuc_1316	0.86	0.48745	-4.3	0.51389	-6.46	0.23533	-8	0.02473	-11.6	0.05019
Amuc_1321	-5.02	0.54029	-7.08	0.28884	-6.24	0.2113	-2.4	0.21613	2.73	0.72367
Amuc_1331	-6.21	0.54029	-8.85	0.23568	-7.66	0.11899	-8.18	0.05728	-7.72	0.23568
Amuc_1333	0.44	0.56073	-3.81	0.01876	-6.03	0.0022	-5.03	0.00025	-9.33	4e-05
Amuc_1358	-6.17	0.54029	-13.44	0.2765	-12.9	0.2072	-6.15	0.14466	-4.34	0.28884
Amuc_1378	-1.94	0.54029	-1.96	0.28884	-1.41	0.45325	-3.07	0.1475	-7.39	0.23568
Amuc_1385	-6.25	0.54029	-14.42	0.23568	-13.42	0.19457	-14.43	0.08481	-12.78	0.2765
Amuc_1394	0.78	0.54029	1.44	0.28884	0.28	0.45325	0.1	0.56234	-4.47	0.28884
Amuc_1398	1.03	0.89728	-4.65	0.01724	-6.6	0.00774	-9.54	0.00444	-12.7	0.0061
Amuc_1399	-0.62	0.81696	-1.48	0.36077	-0.67	0.64808	-1.94	0.12521	-5.85	0.02677
Amuc_1409	0.79	0.20273	2.11	0.14288	1.68	0.20046	1.36	0.3218	0.16	0.14152
Amuc_1412	1.71	0.11239	-7.5	1e-06	-8.08	1e-06	-11.04	1e-06	-9.94	1e-06
Amuc_1413	1.54	0.89728	-9.03	0.02514	-8.58	0.01377	-13.1	0.00141	-14.22	0.00769
Amuc_1421	-0.23	0.79891	-3.53	0.11883	-5.71	0.06129	-6.47	0.0014	-4.19	0.02559
Amuc_1423	-2.74	0.54029	-4.08	0.28884	-3.75	0.16784	-4.57	0.14037	-6.55	0.23568
Amuc_1426	0.17	0.81696	-4.55	0.05019	-6.41	0.03576	-9.02	0.02473	-12.05	0.0367
Amuc_1430	-1.38	0.24528	-8.73	0.01088	-8.53	0.004	-11.93	5e-05	-10.73	0.0042
Amuc_1434	-4.83	0.54029	-7.68	0.28884	-9.42	0.16784	-6.79	0.14037	-9.24	0.23568
Amuc_1440	-1.31	0.54029	-3.99	0.28884	-4.15	0.2113	-9.95	0.12208	-11.23	0.23568
Amuc_1443	-6.83	0.48745	-13.62	0.04265	-13.08	0.03375	-14.05	0.01436	-13.83	0.0367
Amuc_1448	-1.94	0.05039	-9.88	0.00232	-9.28	0.00167	-5	0.00024	-1.58	0.02157
Amuc_1456	-0.94	0.81696	-0.98	0.89612	-1.37	0.52282	-6.75	0.04168	-10.14	0.04742
Amuc_1472	0.13	0.54029	-0.56	0.72367	-0.55	0.45325	-3.36	0.1475	-2.94	0.28884
Amuc_1476	1.12	0.81696	1.9	0.89612	-0.15	0.64808	-3.44	0.06258	-6.4	0.04333
Amuc_1481	-1.58	0.54029	-5.68	0.28884	-6.25	0.2072	-10.65	0.02596	-8.46	0.23568
AMUC_RS12665	-2.66	0.48745	-3.05	0.14972	-5.89	0.11248	-2.14	0.26387	-4.77	0.08576
Amuc_1486	-5.71	0.54029	-13.52	0.28884	-13.1	0.2113	-13.99	0.14466	-15.51	0.23568
Amuc_1492	-0.81	0.54029	-3.71	0.28884	-5.63	0.2113	-8.75	0.13313	-8.2	0.2765
AMUC_RS08035	0.73	0.89728	1.92	0.82859	-0.58	0.45084	-1.52	0.09221	-6.16	0.03454
Amuc_1506	0.66	0.54029	-8.57	0.28884	-8.73	0.2113	-11.95	0.10628	-15.05	0.23568
Amuc_1521	0.96	0.54029	-4.96	0.28884	-6.54	0.2113	-9.3	0.1475	-13	0.2765
Amuc_1523	-7.08	0.54029	-13.32	0.23568	-11.66	0.11899	-14.48	0.02596	-13.52	0.23568
Amuc_1524	-6.64	0.02819	-13.06	0.00594	-10.41	0.004	-4.5	0.00383	-3.05	0.04702
Amuc_1525	-5.87	0.54029	-9.71	0.2765	-11.17	0.16784	-11.77	0.05728	-12.49	0.23568
Amuc_1528	-2.04	0.54029	-3.77	0.28884	-4.56	0.2113	-5.24	0.12208	-6.83	0.23568
Amuc_1537	0.66	0.54267	-1.14	0.01375	-2.67	0.00067	1.26	0.02058	-4.86	0.0004
Amuc_1538	-0.04	0.54029	-1.06	0.28884	-1.78	0.2113	-1.45	0.38482	-7.76	0.23568
Amuc_1543	-0.64	0.91242	0.38	0.43056	-2.61	0.07119	-2.65	0.00418	-5.9	1e-06
Amuc_1549	2.31	0.54029	-6.52	0.28884	-7.08	0.2113	-8.68	0.14679	-8.34	0.2765
Amuc_1558	-2.9	0.48745	-13.5	0.03605	-11.89	0.02006	-14	0.00516	-10.87	0.02677
Amuc_1569	-1.31	0.54029	-2.3	0.28884	-1.99	0.2113	-2.43	0.1475	-5.46	0.28884
Amuc_1575	-0.42	0.48745	-0.26	0.6953	-1.15	0.23533	-0.07	0.56557	-4.56	0.04742
Amuc_1578	0.62	0.54029	2.58	0.28884	1.13	0.80259	0.73	0.77206	-4.62	0.28884
Amuc_1583	-6.28	0.54029	-11.81	0.23568	-10.44	0.11899	-13.01	0.02596	-9.66	0.23568
Amuc_1584	-6.82	0.10519	-15.57	0.0367	-11.37	0.03375	-14.58	0.01214	-13.54	0.03605
Amuc_1586	-7.52	0.54029	-9.57	0.23568	-7.51	0.16784	-10.25	0.02596	-6.86	0.23568
Amuc_1588	-0.48	0.54029	-1.12	0.28884	-0.96	0.45325	-4.44	0.1475	-7.89	0.23568
Amuc_1592	-3.28	0.48745	-9.89	0.04949	-5.57	0.23533	-8.8	0.02442	-7.92	0.04333
Amuc_1593	-5.04	0.54029	-12.1	0.23568	-8.73	0.16784	-13.01	0.02596	-10.34	0.23568
Amuc_1599	-5.73	0.02819	-11.48	0.00594	-11.45	0.00084	-13.33	2e-05	-11.4	0.0042
Amuc_1616	-1.81	0.54029	-0.3	0.72367	-0.6	0.45325	-2.63	0.1475	-6.75	0.2765
Amuc_1620	-0.45	0.54029	-1.16	0.28884	-1.48	0.2113	0.5	0.77206	-3.51	0.2765
Amuc_1622	-3.73	0.54029	-10.02	0.2765	-9.88	0.11899	-12.01	0.02596	-9.17	0.23568
Amuc_1623	-1.13	0.81696	-2.53	0.05019	-4.27	0.03576	-4.02	0.04013	-7.89	0.0367
Amuc_1631	-7.55	0.54029	-10.55	0.23568	-7.53	0.11899	-10.36	0.02596	-8.14	0.23568
Amuc_1655	-0.72	0.54029	0.43	0.72367	-0.74	0.45325	-2.73	0.1475	-6.06	0.28884
Amuc_1656	-0.12	0.55221	-1.13	0.06539	-0.76	0.05277	-3.26	0.01147	-5.3	0.00585
AMUC_RS08860	-0.78	0.82058	1.05	0.67561	0.47	0.28398	-0.83	0.14414	-4.89	1e-06
Amuc_1661	-0.73	0.24716	0.5	0.89612	-0.76	0.41131	-0.7	0.27278	-5.22	0.05019
Amuc_1665	-0.59	0.85424	1.47	0.81205	0.57	0.43668	-0.15	0.15633	-5.15	0.00572
AMUC_RS08950	-4.45	0.54029	-12.43	0.28884	-9.97	0.2113	-11.84	0.10628	-13.95	0.2765
Amuc_1684	-3.75	0.00847	-12.91	0.00106	-10.21	0.00126	-7	4e-05	-2.35	0.01971
Amuc_1687	-2.08	0.24528	-4.54	0.17031	-5.24	0.14503	-9.88	0.00707	-10.87	0.0153
Amuc_1700	-1.13	0.54029	-2.45	0.28884	-3.15	0.2113	-9.47	0.1475	-9.44	0.28884
Amuc_1702	-2.51	0.54029	-6.23	0.28884	-5.37	0.19457	-0.38	0.35358	3.41	0.72367
Amuc_1703	0.41	0.54029	0.8	0.72367	0.13	0.80259	-1.73	0.1475	-6.94	0.2765
Amuc_1704	-0.22	0.4447	-4.07	0.01593	-4.96	0.0197	-13.16	0.00013	-13.99	0.00074
Amuc_1705--Amuc_R0051	1.04	0.54029	2.12	0.28884	1.99	0.80259	0.99	0.56234	-3.17	0.28884
Amuc_1713	-5.66	0.00269	-12.19	0.0002	-10.09	0.0001	-8.13	3e-05	-4.73	0.00072
Amuc_1715	-6.53	0.54029	-10.75	0.23568	-10.55	0.16784	-8.57	0.14037	-9.97	0.23568
Amuc_1716	-1.2	0.48745	-3.54	0.23999	-4.7	0.23533	-10.23	0.01638	-13.56	0.02677
Amuc_1722	1.59	0.81696	4.29	0.36077	2.92	0.64808	4.52	0.37465	-0.23	0.23856
Amuc_1741	-0.03	0.54029	1.34	0.28884	1.22	0.45325	0.25	0.38482	-6.66	0.2765
Amuc_1752	0	0.54029	-1.61	0.28884	-1.14	0.45325	-0.87	0.38482	-3.52	0.2765
Amuc_1759	-6.39	0.54029	-12.01	0.23568	-10.6	0.2072	-11.05	0.05728	-10.33	0.23568
Amuc_1760	-6.79	0.54029	-10.49	0.2765	-10.28	0.19457	-11.6	0.08481	-11.72	0.23568
Amuc_1763	-4.8	0.54029	-11.72	0.28884	-10.58	0.2113	-11.63	0.14466	-14.28	0.23568
Amuc_1764	-2.14	0.54029	-5.83	0.28884	-5.87	0.2113	-10.17	0.10628	-11.35	0.23568
Amuc_1765	-0.58	0.54029	0.85	0.28884	0.78	0.80259	0.22	0.56234	-4.9	0.2765
Amuc_1771	-2.46	0.54029	-9.37	0.28884	-10.47	0.2072	-13.66	0.08481	-14.89	0.23568
Amuc_1776	-6.54	0.54029	-14.82	0.23568	-9.84	0.19457	-14.47	0.08481	-15.4	0.23568
Amuc_1781	-7.14	0.15558	-14.3	0.0061	-12.06	0.00227	-15.53	0.00012	-13.56	0.0042
Amuc_1794	0.81	0.67113	2.93	0.88729	1.99	0.53276	4.51	0.51388	-2.15	0.07636
Amuc_1797	-1.12	0.54029	-1.57	0.28884	-2.32	0.2113	-3.17	0.14679	-6.29	0.23568
Amuc_1799	0.46	0.54029	0.31	0.72367	0.24	0.80259	4.88	0.1475	-0.46	0.72367
Amuc_1804	0.74	0.54029	1.55	0.28884	0.98	0.80259	1.32	0.24657	-2.92	0.28884
Amuc_1807	1.97	0.54029	1.71	0.28884	0.52	0.80259	-0.04	1	-7.19	0.28884
Amuc_1830	-1.88	0.54029	-2.56	0.28884	-4.11	0.2113	-4.16	0.1475	-3.15	0.2765
Amuc_1832	0.32	0.54029	1.04	0.72367	0.07	0.45325	-0.54	0.38482	-5.54	0.28884
AMUC_RS09790	1.33	0.54029	-1.33	0.28884	-0.6	0.45325	-10.74	0.05728	-11.49	0.23568
Amuc_1834	-6.03	0.54029	-9.83	0.2765	-7.92	0.11899	-10.34	0.02596	-8.45	0.23568
Amuc_1841	-0.09	0.81696	-5.21	0.04949	-7.92	0.02848	-1.21	0.07068	1.53	0.69173
Amuc_1854	-1.99	0.54029	-11.02	0.28884	-8.51	0.2113	-9.7	0.12208	-9.66	0.28884
Amuc_1856	-6.3	0.54029	-13.29	0.23568	-11.28	0.19457	-14.76	0.02596	-13.44	0.23568
Amuc_1865	-1.34	0.36616	-1.85	0.27902	-2	0.11928	-3.99	0.02927	-8.28	0.02258
Amuc_1866	-1.96	0.54029	-1.97	0.28884	-2.69	0.2113	-3.64	0.14679	-7.31	0.23568
Amuc_1868	-1.42	0.05743	-5.31	0.00147	-5.46	0.0004	-8.06	3e-05	-11.25	0.00014
Amuc_1869	-3.22	0.02346	-7.42	0.00084	-7.86	0.00038	-10.76	2e-05	-10.91	0.00027
Amuc_1890	-0.89	0.36616	0.29	0.94247	0.88	0.80161	1.16	0.68867	1.96	0.51525
Amuc_1891	0.93	0.69854	1.91	0.42728	0.19	0.33906	1.47	0.64349	-1.2	0.09395
Amuc_1900	-2.93	0.54029	-9.05	0.23568	-4.56	0.16784	-8.52	0.05728	-6.22	0.23568
Amuc_1903	-3.42	0.10519	-2.98	0.08868	-7.99	0.02848	-1.48	0.04127	0.22	0.69173
Amuc_1911	-0.52	0.89728	-0.67	0.61343	-1.11	0.33969	-0.08	0.30289	-3.51	0.02398
Amuc_1915	2.18	0.48745	-0.03	0.89612	-3.45	0.41131	-5.66	0.05322	-10.53	0.0367
Amuc_1919	-2.49	0.54029	-4.04	0.28884	-3.22	0.2113	-6.35	0.14466	-10.85	0.23568
Amuc_1936	-0.85	0.48745	-0.98	0.51389	0.23	0.64064	-0.57	0.32066	-5.93	0.03605
Amuc_1939	-0.88	0.67326	-3.59	0.00471	-2.45	0.00427	-4.67	0.00035	-8.59	0.00019
Amuc_1943	-5.58	0.54029	-11.89	0.2765	-11.96	0.16784	-12.73	0.08481	-13.21	0.23568
Amuc_1944	-6.65	0.54029	-8.33	0.2765	-9.59	0.11899	-0.6	0.35358	3.46	0.72367
Amuc_1946	-4.49	0.10519	-12.44	0.03605	-10.5	0.02886	-13.3	0.00316	-14.19	0.02677
Amuc_1949	0.41	0.54029	0.38	0.72367	-0.48	0.45325	-2.36	0.1475	-6.14	0.28884
Amuc_1951	-0.96	0.54029	-0.5	0.72367	-2.14	0.2113	1.72	1	-5.98	0.2765
Amuc_1974	-2.83	0.03509	-11.13	0.00011	-10.42	0.0001	-12.35	1e-06	-12.17	7e-05
Amuc_1982	1.03	0.51861	-4.34	0.01154	-6.47	0.00774	-10.03	0.00503	-12.14	0.01081
Amuc_1983	-2.26	0.54029	-7.05	0.28884	-6.67	0.2113	-12.56	0.02596	-9.32	0.23568
Amuc_1984	-3.45	0.05743	-7.33	0.01413	-5.39	0.00049	-10.59	1e-06	-8.97	0.00014
Amuc_1986	0.68	0.54029	-4.04	0.23568	-3.02	0.11899	-3.38	0.08481	-3.44	0.23568
Amuc_1995	-5.92	0.54029	-8.7	0.28884	-9.16	0.11899	-11.44	0.02596	-8.52	0.23568
Amuc_2002	-0.26	0.81696	-2.77	0.05019	-3.51	0.08284	-4.54	0.03151	-2.86	0.08576
Amuc_2013	-6.01	0.00169	-7.61	0.00017	-0.55	0.16623	-4.14	8e-05	-8.73	5e-05
Amuc_2021	-6.47	0.54029	-15.07	0.23568	-10.83	0.2072	-14.74	0.05728	-14.24	0.2765
Amuc_2034	0.14	0.81696	-0.82	0.36077	-2.49	0.30993	-0.6	0.42774	-6.06	0.14598
Amuc_2038	-1.83	0.54029	-4.05	0.28884	-3.74	0.2113	7.45	0.56234	3.35	0.72367
Amuc_2043	1.69	0.54029	3.98	0.28884	3.42	0.2113	-9.66	0.13313	-12.15	0.23568
Amuc_2051	-0.24	0.81696	-6.29	0.05019	-8.18	0.03495	-11.57	0.00315	-10.88	0.03605
Amuc_2053	-2.57	0.54029	-12.83	0.2765	-11.65	0.19457	-13.44	0.08481	-13.02	0.23568
Amuc_2057	1.02	0.48745	2.04	0.51389	0.69	0.92726	0.81	0.87551	-2.78	0.08965
Amuc_2070	-0.13	0.67113	-2.12	0.23755	0.15	0.449	-1.94	0.04083	-4.76	0.07647
Amuc_2072	-0.96	0.12579	-8.06	0.00073	-10.94	0.00041	-7.81	3e-05	-6.26	0.00066
Amuc_2077	0.05	0.89728	-3.18	0.21987	-1.8	0.88017	-14.03	0.00012	-6.05	0.05052
Amuc_2086	-1.92	0.54029	-4.19	0.28884	-0.2	0.45325	-8.74	0.02596	-5.94	0.23568
Amuc_2099	0.29	0.89728	0.67	0.94247	0.57	0.88017	-4.99	0.0048	-5.32	0.01125
Amuc_2106	-5.77	0.54029	-7.25	0.28884	-4.93	0.2113	-10.42	0.02596	-7.48	0.23568
Amuc_2112	-0.93	0.15558	-0.18	0.21946	-1.79	0.06213	-0.31	0.10863	-5.69	0.00902
Amuc_2116	0.35	0.54029	-0.17	0.72367	-0.84	0.45325	-0.08	0.56234	-2.26	0.2765
Amuc_2119	-6.31	0.54029	-11.12	0.2765	-11.73	0.11899	-13.13	0.02596	-10.11	0.23568
Amuc_2133	0.52	0.54029	3.88	0.28884	1.82	0.45325	1.37	0.1475	-1.16	0.72367
AMUC_RS11390	0.61	0.20194	-4.03	0.09808	-5.83	0.00617	-9.13	0.0007	-11.28	0.0011
Amuc_2136	0.3	0.89728	2.54	0.42728	0.87	0.95992	1.22	0.45672	-1.71	0.09664
Amuc_2141	1.55	0.48745	-4.31	0.05019	-8.06	0.03576	-7.95	0.01977	-13.05	0.0367
Amuc_2146	-5.51	0.54029	-8.27	0.2765	-10.75	0.11899	-10.4	0.05728	-8.74	0.23568
Amuc_2158	-2.18	0.54029	-2.54	0.28884	-1.59	0.2113	-7.39	0.02596	-4.09	0.23568
Amuc_2163	-5.43	0.54029	-7.55	0.28884	-7.12	0.2072	-0.46	0.36752	2.74	0.72367
Amuc_2165	-1.61	0.51861	-1.96	0.42728	-3.93	0.33969	-3.85	0.02963	-6.05	0.01724
Amuc_2166	-2.26	0.54029	-3.46	0.28884	-4.03	0.2113	-8.51	0.05728	-6.42	0.23568
Amuc_2167	1.4	0.54029	2.36	0.28884	-0.06	0.80259	-0.03	1	-0.68	0.72367
Amuc_2176	-2.03	0.54029	-8.26	0.2765	-4.74	0.2113	-10.89	0.02596	-6.97	0.23568

## Sheet: RNAseq mice 
Transcriptional response in A. muciniphila colonized mice.
Differential expression (DESeq2) between mice colonized with the mul1A::Tn mutant vs wild-type
Ensembl gene ID	base mean	Log2 fold change	lfcSE	pvalue	padj	name	description
ENSMUSG00000022351	2219.13	0.709673	0.116046	4.69e-11	4.27e-07	Sqle	squalene epoxidase [Source:MGI Symbol;Acc:MGI:109296]
ENSMUSG00000076674	82.4394	2.80646	0.447589	2.5e-11	4.27e-07	Ighv3-8	immunoglobulin heavy variable V3-8 [Source:MGI Symbol;Acc:MGI:3645298]
ENSMUSG00000044254	697.988	1.29864	0.223199	2.59e-10	1.57e-06	Pcsk9	proprotein convertase subtilisin/kexin type 9 [Source:MGI Symbol;Acc:MGI:2140260]
ENSMUSG00000029482	2373.33	0.666176	0.12989	1.26e-08	5.71e-05	Aacs	acetoacetyl-CoA synthetase [Source:MGI Symbol;Acc:MGI:1926144]
ENSMUSG00000093930	4513.06	0.814429	0.16361	2.76e-08	0.00010028	Hmgcs1	3-hydroxy-3-methylglutaryl-Coenzyme A synthase 1 [Source:MGI Symbol;Acc:MGI:107592]
ENSMUSG00000062515	1011.8	-1.03839	0.213327	4.65e-08	0.000120741	Fabp4	fatty acid binding protein 4, adipocyte [Source:MGI Symbol;Acc:MGI:88038]
ENSMUSG00000001467	2061.97	0.765243	0.156039	4.01e-08	0.000120741	Cyp51	cytochrome P450, family 51 [Source:MGI Symbol;Acc:MGI:106040]
ENSMUSG00000076552	56.8363	-3.10872	0.690462	2.59e-07	0.000588364	Igkv4-61	immunoglobulin kappa chain variable 4-61 [Source:MGI Symbol;Acc:MGI:4439819]
ENSMUSG00000031604	2294.86	0.574546	0.12851	3.24e-07	0.000654035	Msmo1	methylsterol monoxygenase 1 [Source:MGI Symbol;Acc:MGI:1913484]
ENSMUSG00000021670	1990.07	0.632246	0.144943	5.1e-07	0.000926389	Hmgcr	3-hydroxy-3-methylglutaryl-Coenzyme A reductase [Source:MGI Symbol;Acc:MGI:96159]
ENSMUSG00000021273	2213.57	0.658505	0.152979	6.82e-07	0.00112754	Fdft1	farnesyl diphosphate farnesyl transferase 1 [Source:MGI Symbol;Acc:MGI:102706]
ENSMUSG00000098814	1962.33	6.68422	1.67905	1.63e-06	0.00246682	Igkv19-93	immunoglobulin kappa chain variable 19-93 [Source:MGI Symbol;Acc:MGI:107617]
ENSMUSG00000095981	146.468	-1.40273	0.34642	1.89e-06	0.00264949	Ighv10-1	immunoglobulin heavy variable 10-1 [Source:MGI Symbol;Acc:MGI:4439620]
ENSMUSG00000031722	44.7135	-2.04599	0.507479	2.27e-06	0.00286996	Hp	haptoglobin [Source:MGI Symbol;Acc:MGI:96211]
ENSMUSG00000030278	195.702	-1.25969	0.314261	2.37e-06	0.00286996	Cidec	cell death-inducing DFFA-like effector c [Source:MGI Symbol;Acc:MGI:95585]
ENSMUSG00000012705	192.217	-1.54834	0.408597	5.48e-06	0.00622604	Retn	resistin [Source:MGI Symbol;Acc:MGI:1888506]
ENSMUSG00000076594	17.8325	3.32921	0.883265	8.71e-06	0.00932007	Igkv6-13	immunoglobulin kappa variable 6-13 [Source:MGI Symbol;Acc:MGI:1330829]
ENSMUSG00000032193	3993.08	0.491767	0.137231	1.24e-05	0.0125509	Ldlr	low density lipoprotein receptor [Source:MGI Symbol;Acc:MGI:96765]
ENSMUSG00000086583	407.113	-0.572193	0.161768	1.47e-05	0.0140547	Gm15500	predicted pseudogene 15500 [Source:MGI Symbol;Acc:MGI:3782947]
ENSMUSG00000057465	505.467	-0.558263	0.161709	2.03e-05	0.0184341	Saa2	serum amyloid A 2 [Source:MGI Symbol;Acc:MGI:98222]
ENSMUSG00000026675	265.909	0.623212	0.184303	2.63e-05	0.022786	Hsd17b7	hydroxysteroid (17-beta) dehydrogenase 7 [Source:MGI Symbol;Acc:MGI:1330808]
ENSMUSG00000006517	1218.97	0.629713	0.188699	3.04e-05	0.0251617	Mvd	mevalonate (diphospho) decarboxylase [Source:MGI Symbol;Acc:MGI:2179327]
ENSMUSG00000033105	1036.4	0.716857	0.231969	6.84e-05	0.0541066	Lss	lanosterol synthase [Source:MGI Symbol;Acc:MGI:1336155]
ENSMUSG00000079641	2511.64	-0.479448	0.156271	7.55e-05	0.0571782	Rpl39	ribosomal protein L39 [Source:MGI Symbol;Acc:MGI:1914498]
ENSMUSG00000040564	37.9041	-1.37105	0.455811	8.48e-05	0.0597172	Apoc1	apolipoprotein C-I [Source:MGI Symbol;Acc:MGI:88053]
ENSMUSG00000091509	106.095	-0.869194	0.287961	8.54e-05	0.0597172	Gm17066	predicted gene 17066 [Source:MGI Symbol;Acc:MGI:4937893]
ENSMUSG00000074115	31150.7	-0.508607	0.172372	0.000106009	0.0713875	Saa1	serum amyloid A 1 [Source:MGI Symbol;Acc:MGI:98221]
ENSMUSG00000026614	188.755	-1.34257	0.476013	0.000143071	0.0929039	Slc30a10	solute carrier family 30, member 10 [Source:MGI Symbol;Acc:MGI:2685058]
ENSMUSG00000064337	20407.4	-0.421857	0.149778	0.000164795	0.0990016	mt-Rnr1	mitochondrially encoded 12S rRNA [Source:MGI Symbol;Acc:MGI:102493]
ENSMUSG00000081049	152.782	-0.0233348	0.0461526	0.000162932	0.0990016	Rps24-ps3	ribosomal protein S24, pseudogene 3 [Source:MGI Symbol;Acc:MGI:3644407]
ENSMUSG00000028613	80.2537	0.960201	0.342045	0.000168796	0.0990016	Lrp8	low density lipoprotein receptor-related protein 8, apolipoprotein e receptor [Source:MGI Symbol;Acc:MGI:1340044]
ENSMUSG00000084174	12305.8	-0.688062	0.245438	0.00018359	0.104314	Sycn	syncollin [Source:MGI Symbol;Acc:MGI:1915666]
ENSMUSG00000074259	140.281	0.677913	0.246819	0.000189363	0.104333	Gramd2	GRAM domain containing 2 [Source:MGI Symbol;Acc:MGI:3528937]
ENSMUSG00000030762	11099	-0.812037	0.303048	0.000223273	0.119399	Aqp8	aquaporin 8 [Source:MGI Symbol;Acc:MGI:1195271]
ENSMUSG00000023019	695.207	-0.359482	0.134565	0.000249503	0.123764	Gpd1	glycerol-3-phosphate dehydrogenase 1 (soluble) [Source:MGI Symbol;Acc:MGI:95679]
ENSMUSG00000087291	1451.27	0.393796	0.147016	0.000243728	0.123764	Gm11946	predicted gene 11946 [Source:MGI Symbol;Acc:MGI:3650071]
ENSMUSG00000055322	6152.02	0.439743	0.168287	0.000251856	0.123764	Tns1	tensin 1 [Source:MGI Symbol;Acc:MGI:104552]
ENSMUSG00000027894	340.285	0.644358	0.246197	0.000275514	0.131826	Slc6a17	solute carrier family 6 (neurotransmitter transporter), member 17 [Source:MGI Symbol;Acc:MGI:2442535]
ENSMUSG00000050621	162.785	-0.545709	0.210577	0.000299241	0.13602	Rps27rt	ribosomal protein S27, retrogene [Source:MGI Symbol;Acc:MGI:3704345]
ENSMUSG00000022463	5300.69	0.288893	0.112578	0.000295216	0.13602	Srebf2	sterol regulatory element binding factor 2 [Source:MGI Symbol;Acc:MGI:107585]
ENSMUSG00000029014	779.192	-0.355457	0.138409	0.000326466	0.144776	Dnajc2	DnaJ heat shock protein family (Hsp40) member C2 [Source:MGI Symbol;Acc:MGI:99470]
ENSMUSG00000029575	541.303	0.425244	0.166678	0.00033484	0.144954	Mmab	methylmalonic aciduria (cobalamin deficiency) cblB type homolog (human) [Source:MGI Symbol;Acc:MGI:1924947]
ENSMUSG00000094322	578.059	-0.00388102	0.0326048	0.000385054	0.162815	Ighv9-4	immunoglobulin heavy variable 9-4 [Source:MGI Symbol;Acc:MGI:3646379]
ENSMUSG00000034868	323.808	-0.402676	0.162504	0.000404825	0.163567	Myl12b	myosin, light chain 12B, regulatory [Source:MGI Symbol;Acc:MGI:107494]
ENSMUSG00000055632	3663.86	0.555858	0.224764	0.000399372	0.163567	Hmcn2	hemicentin 2 [Source:MGI Symbol;Acc:MGI:2677838]
ENSMUSG00000034738	1237.76	-0.494386	0.202487	0.00042812	0.165619	Nostrin	nitric oxide synthase trafficker [Source:MGI Symbol;Acc:MGI:3606242]
ENSMUSG00000053054	23.5541	-0.00370987	0.0325751	0.000423306	0.165619	Adh6a	alcohol dehydrogenase 6A (class V) [Source:MGI Symbol;Acc:MGI:1916367]
ENSMUSG00000025290	9959.7	-0.394562	0.166724	0.000495784	0.183034	Rps24	ribosomal protein S24 [Source:MGI Symbol;Acc:MGI:98147]
ENSMUSG00000057914	133.315	0.663444	0.278428	0.000503339	0.183034	Cacnb2	calcium channel, voltage-dependent, beta 2 subunit [Source:MGI Symbol;Acc:MGI:894644]
ENSMUSG00000019970	1638.07	0.704865	0.295923	0.000492407	0.183034	Sgk1	serum/glucocorticoid regulated kinase 1 [Source:MGI Symbol;Acc:MGI:1340062]
ENSMUSG00000028778	47.4438	0.910123	0.382348	0.000519113	0.185069	Hcrtr1	hypocretin (orexin) receptor 1 [Source:MGI Symbol;Acc:MGI:2385650]
ENSMUSG00000053963	803.677	0.501805	0.213344	0.000547537	0.191448	Stum	mechanosensory transduction mediator [Source:MGI Symbol;Acc:MGI:2138735]
ENSMUSG00000044345	1908.15	0.373673	0.159876	0.000585929	0.201007	Marveld1	MARVEL (membrane-associating) domain containing 1 [Source:MGI Symbol;Acc:MGI:2147570]
ENSMUSG00000090733	9746.04	-0.393887	0.17338	0.000616576	0.201035	Rps27	ribosomal protein S27 [Source:MGI Symbol;Acc:MGI:1888676]
ENSMUSG00000042216	557.918	0.367884	0.158555	0.000605955	0.201035	Sgsm1	small G protein signaling modulator 1 [Source:MGI Symbol;Acc:MGI:107320]
ENSMUSG00000096054	848.72	0.379849	0.164382	0.000619182	0.201035	Syne1	spectrin repeat containing, nuclear envelope 1 [Source:MGI Symbol;Acc:MGI:1927152]
ENSMUSG00000031844	2583.08	-0.424946	0.187939	0.000667786	0.213012	Hsd17b2	hydroxysteroid (17-beta) dehydrogenase 2 [Source:MGI Symbol;Acc:MGI:1096386]
ENSMUSG00000038497	1842.67	0.313001	0.139187	0.000736755	0.225173	Tmco3	transmembrane and coiled-coil domains 3 [Source:MGI Symbol;Acc:MGI:2444946]
ENSMUSG00000045294	2116.11	0.41294	0.185855	0.000743065	0.225173	Insig1	insulin induced gene 1 [Source:MGI Symbol;Acc:MGI:1916289]
ENSMUSG00000027654	368.517	0.489277	0.22065	0.000738605	0.225173	Fam83d	family with sequence similarity 83, member D [Source:MGI Symbol;Acc:MGI:1919128]
ENSMUSG00000039680	737.619	-0.399337	0.181464	0.000768981	0.226434	Mrps6	mitochondrial ribosomal protein S6 [Source:MGI Symbol;Acc:MGI:2153111]
ENSMUSG00000073940	51.9032	-0.00597418	0.0330581	0.000775209	0.226434	Hbb-bt	hemoglobin, beta adult t chain [Source:MGI Symbol;Acc:MGI:5474850]
ENSMUSG00000029009	472.644	0.377956	0.171424	0.000784587	0.226434	Mthfr	methylenetetrahydrofolate reductase [Source:MGI Symbol;Acc:MGI:106639]
ENSMUSG00000069917	59.2273	-0.00576934	0.0330037	0.000884748	0.251351	Hba-a2	hemoglobin alpha, adult chain 2 [Source:MGI Symbol;Acc:MGI:96016]
ENSMUSG00000107176	360.321	-0.466235	0.221432	0.000915778	0.256164	Gm9794	predicted pseudogene 9794 [Source:MGI Symbol;Acc:MGI:3642653]
ENSMUSG00000061848	94.9259	-0.0149878	0.0374187	0.000931082	0.256499	Gm5805	predicted gene 5805 [Source:MGI Symbol;Acc:MGI:3644633]
ENSMUSG00000061780	1278.87	-1.43353	0.720021	0.000991299	0.258339	Cfd	complement factor D (adipsin) [Source:MGI Symbol;Acc:MGI:87931]
ENSMUSG00000042133	1861.23	-0.309776	0.149005	0.0010088	0.258339	Ppig	peptidyl-prolyl isomerase G (cyclophilin G) [Source:MGI Symbol;Acc:MGI:2445173]
ENSMUSG00000025479	156.123	-0.00668502	0.0332562	0.0010004	0.258339	Cyp2e1	cytochrome P450, family 2, subfamily e, polypeptide 1 [Source:MGI Symbol;Acc:MGI:88607]
ENSMUSG00000021294	283.731	0.552056	0.265453	0.000973102	0.258339	Kif26a	kinesin family member 26A [Source:MGI Symbol;Acc:MGI:2447072]
ENSMUSG00000058258	155.488	0.686524	0.33241	0.000979759	0.258339	Idi1	isopentenyl-diphosphate delta isomerase [Source:MGI Symbol;Acc:MGI:2442264]
ENSMUSG00000026083	2497.57	-0.27095	0.129719	0.00106868	0.269872	Eif5b	eukaryotic translation initiation factor 5B [Source:MGI Symbol;Acc:MGI:2441772]
ENSMUSG00000031590	1504.04	-0.27135	0.132931	0.00110971	0.273984	Frg1	FSHD region gene 1 [Source:MGI Symbol;Acc:MGI:893597]
ENSMUSG00000039956	19.1334	-0.0050124	0.0328209	0.0011151	0.273984	Mrap	melanocortin 2 receptor accessory protein [Source:MGI Symbol;Acc:MGI:1924287]
ENSMUSG00000071528	1770.12	-0.31107	0.154845	0.00113241	0.274526	Atp5md	ATP synthase membrane subunit DAPIT [Source:MGI Symbol;Acc:MGI:1891435]
ENSMUSG00000013236	1315.24	0.339633	0.172312	0.00128588	0.30763	Ptprs	protein tyrosine phosphatase, receptor type, S [Source:MGI Symbol;Acc:MGI:97815]
ENSMUSG00000035969	823.864	0.312106	0.158749	0.00133109	0.314309	Rusc2	RUN and SH3 domain containing 2 [Source:MGI Symbol;Acc:MGI:2140371]
ENSMUSG00000076137	91.6239	-0.0144209	0.0369883	0.0014438	0.336553	Gm26384	predicted gene, 26384 [Source:MGI Symbol;Acc:MGI:5456161]
ENSMUSG00000102070	37.3932	-0.805683	0.439571	0.00149948	0.343902	Gm28661	predicted gene 28661 [Source:MGI Symbol;Acc:MGI:5579367]
ENSMUSG00000073420	1355.27	0.357726	0.191018	0.00151315	0.343902	Btnl5-ps	butyrophilin-like 5, pseudogene [Source:MGI Symbol;Acc:MGI:1932037]
ENSMUSG00000027820	54.2013	-0.809663	0.448093	0.00157169	0.34753	Mme	membrane metallo endopeptidase [Source:MGI Symbol;Acc:MGI:97004]
ENSMUSG00000076543	18.7977	-0.00557182	0.0329473	0.00158274	0.34753	Igkv4-74	immunoglobulin kappa variable 4-74 [Source:MGI Symbol;Acc:MGI:3779447]
ENSMUSG00000026308	74.9231	0.619118	0.338099	0.00158646	0.34753	Klhl30	kelch-like 30 [Source:MGI Symbol;Acc:MGI:1918038]
ENSMUSG00000074656	4315.31	-0.307961	0.17143	0.00173422	0.375377	Eif2s2	eukaryotic translation initiation factor 2, subunit 2 (beta) [Source:MGI Symbol;Acc:MGI:1914454]
ENSMUSG00000083992	246.187	-0.450902	0.25792	0.00177109	0.378846	Gm11478	predicted gene 11478 [Source:MGI Symbol;Acc:MGI:3650888]
ENSMUSG00000056671	427.754	-0.357725	0.204456	0.00184225	0.385009	Prelid2	PRELI domain containing 2 [Source:MGI Symbol;Acc:MGI:1924869]
ENSMUSG00000009248	237.676	-0.0196283	0.0413266	0.00183507	0.385009	Ascl2	achaete-scute family bHLH transcription factor 2 [Source:MGI Symbol;Acc:MGI:96920]
ENSMUSG00000039234	1260.14	0.320311	0.182776	0.00188729	0.386196	Sec24d	Sec24 related gene family, member D (S. cerevisiae) [Source:MGI Symbol;Acc:MGI:1916858]
ENSMUSG00000028005	301.883	0.398505	0.229829	0.00189041	0.386196	Gucy1b1	guanylate cyclase 1, soluble, beta 1 [Source:MGI Symbol;Acc:MGI:1860604]
ENSMUSG00000025794	7666.4	-0.334666	0.194998	0.00195974	0.395911	Rpl14	ribosomal protein L14 [Source:MGI Symbol;Acc:MGI:1914365]
ENSMUSG00000105906	2194.88	-0.00485876	0.0327848	0.00202415	0.404429	Iglc1	immunoglobulin lambda constant 1 [Source:MGI Symbol;Acc:MGI:99546]
ENSMUSG00000026207	824.528	0.316024	0.187961	0.00213404	0.421752	Speg	SPEG complex locus [Source:MGI Symbol;Acc:MGI:109282]
ENSMUSG00000005611	1495.63	0.308316	0.182453	0.00216883	0.424017	Mrvi1	MRV integration site 1 [Source:MGI Symbol;Acc:MGI:1338023]
ENSMUSG00000035686	189.695	-0.0082054	0.0337443	0.00222649	0.430661	Thrsp	thyroid hormone responsive [Source:MGI Symbol;Acc:MGI:109126]
ENSMUSG00000031748	622.783	0.302886	0.18488	0.00232036	0.434937	Gnao1	guanine nucleotide binding protein, alpha O [Source:MGI Symbol;Acc:MGI:95775]
ENSMUSG00000045672	558.622	0.311816	0.193098	0.00230802	0.434937	Col27a1	collagen, type XXVII, alpha 1 [Source:MGI Symbol;Acc:MGI:2672118]
ENSMUSG00000038319	452.388	0.331656	0.204372	0.00231605	0.434937	Kcnh2	potassium voltage-gated channel, subfamily H (eag-related), member 2 [Source:MGI Symbol;Acc:MGI:1341722]
ENSMUSG00000094806	1139.02	-0.346619	0.218212	0.00234856	0.43573	Cyp2d10	cytochrome P450, family 2, subfamily d, polypeptide 10 [Source:MGI Symbol;Acc:MGI:88602]
ENSMUSG00000066361	21.5627	-0.0068741	0.0332971	0.00243745	0.447654	Serpina3c	serine (or cysteine) peptidase inhibitor, clade A, member 3C [Source:MGI Symbol;Acc:MGI:102848]
ENSMUSG00000008348	1435.76	-0.38229	0.247999	0.00248326	0.451506	Ubc	ubiquitin C [Source:MGI Symbol;Acc:MGI:98889]
ENSMUSG00000030306	238.92	0.4362	0.289314	0.00258464	0.460725	Tmtc1	transmembrane and tetratricopeptide repeat containing 1 [Source:MGI Symbol;Acc:MGI:3039590]
ENSMUSG00000026678	3735.29	0.538259	0.36254	0.00257206	0.460725	Rgs5	regulator of G-protein signaling 5 [Source:MGI Symbol;Acc:MGI:1098434]
ENSMUSG00000037335	222.289	0.347325	0.22891	0.00264944	0.467691	Hand1	heart and neural crest derivatives expressed 1 [Source:MGI Symbol;Acc:MGI:103577]
ENSMUSG00000074800	48.883	-0.686228	0.48526	0.00271117	0.473986	Gm4149	predicted pseudogene 4149 [Source:MGI Symbol;Acc:MGI:3782325]
ENSMUSG00000055385	73.2125	-0.682363	0.492507	0.00277451	0.479201	Rnf212	ring finger protein 212 [Source:MGI Symbol;Acc:MGI:3645767]
ENSMUSG00000094546	72.7563	0.908416	0.645033	0.00279372	0.479201	Ighv1-26	immunoglobulin heavy variable 1-26 [Source:MGI Symbol;Acc:MGI:4439641]
ENSMUSG00000024236	1674.42	0.289556	0.193872	0.00286382	0.486634	Svil	supervillin [Source:MGI Symbol;Acc:MGI:2147319]
ENSMUSG00000024112	1183.91	0.287689	0.198176	0.00315323	0.530852	Cacna1h	calcium channel, voltage-dependent, T type, alpha 1H subunit [Source:MGI Symbol;Acc:MGI:1928842]
ENSMUSG00000064339	55525.6	-0.326643	0.245256	0.0032375	0.540039	mt-Rnr2	mitochondrially encoded 16S rRNA [Source:MGI Symbol;Acc:MGI:102492]
ENSMUSG00000037989	609.377	0.322611	0.240631	0.00329987	0.545439	Wnk2	WNK lysine deficient protein kinase 2 [Source:MGI Symbol;Acc:MGI:1922857]
ENSMUSG00000027408	109.144	-0.563622	0.472532	0.00342838	0.55941	Cpxm1	carboxypeptidase X 1 (M14 family) [Source:MGI Symbol;Acc:MGI:1934569]
ENSMUSG00000062456	166.268	-0.0189619	0.0405387	0.0034888	0.55941	Rpl9-ps6	ribosomal protein L9, pseudogene 6 [Source:MGI Symbol;Acc:MGI:3642682]
ENSMUSG00000073043	1471.08	0.260316	0.193227	0.00350747	0.55941	Atoh1	atonal bHLH transcription factor 1 [Source:MGI Symbol;Acc:MGI:104654]
ENSMUSG00000063142	462.372	0.321441	0.249267	0.0034841	0.55941	Kcnma1	potassium large conductance calcium-activated channel, subfamily M, alpha member 1 [Source:MGI Symbol;Acc:MGI:99923]
ENSMUSG00000047215	10730.2	-0.285936	0.224269	0.00355369	0.560718	Rpl9	ribosomal protein L9 [Source:MGI Symbol;Acc:MGI:1298373]
ENSMUSG00000061477	7051.7	-0.261092	0.185775	0.00360818	0.560718	Rps7	ribosomal protein S7 [Source:MGI Symbol;Acc:MGI:1333818]
ENSMUSG00000015605	1235.79	0.209012	0.14788	0.003605	0.560718	Srf	serum response factor [Source:MGI Symbol;Acc:MGI:106658]
ENSMUSG00000074578	607.579	-0.335746	0.291642	0.00378924	0.561385	Zfas1	zinc finger, NFX1-type containing 1, antisense RNA 1 [Source:MGI Symbol;Acc:MGI:1916199]
ENSMUSG00000032702	957.818	0.257874	0.201564	0.00378523	0.561385	Kank1	KN motif and ankyrin repeat domains 1 [Source:MGI Symbol;Acc:MGI:2147707]
ENSMUSG00000035900	1008.64	0.258801	0.205974	0.00379773	0.561385	Gramd4	GRAM domain containing 4 [Source:MGI Symbol;Acc:MGI:2676308]
ENSMUSG00000058290	336.352	0.287453	0.230993	0.00369547	0.561385	Espl1	extra spindle pole bodies 1, separase [Source:MGI Symbol;Acc:MGI:2146156]
ENSMUSG00000035275	75.2559	0.555768	0.486052	0.00375922	0.561385	Raver2	ribonucleoprotein, PTB-binding 2 [Source:MGI Symbol;Acc:MGI:2443623]
ENSMUSG00000057836	32.8119	1.25844	1.41044	0.00378159	0.561385	Xlr3a	X-linked lymphocyte-regulated 3A [Source:MGI Symbol;Acc:MGI:109506]
ENSMUSG00000036305	96.9339	-0.0143464	0.0368448	0.00386362	0.563959	Rpl39-ps	ribosomal protein L39, pseudogene [Source:MGI Symbol;Acc:MGI:3705781]
ENSMUSG00000046694	228.024	0.356712	0.315716	0.00387718	0.563959	Tent5b	terminal nucleotidyltransferase 5B [Source:MGI Symbol;Acc:MGI:2140500]
ENSMUSG00000024697	1474.81	-0.185343	0.139816	0.00405224	0.566753	Gna14	guanine nucleotide binding protein, alpha 14 [Source:MGI Symbol;Acc:MGI:95769]
ENSMUSG00000058454	2217.65	0.218906	0.166356	0.0039549	0.566753	Dhcr7	7-dehydrocholesterol reductase [Source:MGI Symbol;Acc:MGI:1298378]
ENSMUSG00000073700	506.322	0.233482	0.188776	0.00401689	0.566753	Klhl21	kelch-like 21 [Source:MGI Symbol;Acc:MGI:1919288]
ENSMUSG00000058070	1550.3	0.344759	0.306967	0.00402727	0.566753	Eml1	echinoderm microtubule associated protein like 1 [Source:MGI Symbol;Acc:MGI:1915769]
ENSMUSG00000048038	35.9421	0.623509	0.586087	0.0040425	0.566753	Ccdc187	coiled-coil domain containing 187 [Source:MGI Symbol;Acc:MGI:3045295]
ENSMUSG00000078784	467.809	-0.254995	0.223697	0.00419037	0.57204	Rbis	ribosomal biogenesis factor [Source:MGI Symbol;Acc:MGI:1916376]
ENSMUSG00000025934	365.207	-0.0135234	0.0363094	0.00420163	0.57204	Gsta3	glutathione S-transferase, alpha 3 [Source:MGI Symbol;Acc:MGI:95856]
ENSMUSG00000014177	627.454	0.241194	0.205619	0.0041857	0.57204	Tvp23b	trans-golgi network vesicle protein 23B [Source:MGI Symbol;Acc:MGI:1914760]
ENSMUSG00000028655	44.3731	0.808369	0.969268	0.0042159	0.57204	Mfsd2a	major facilitator superfamily domain containing 2A [Source:MGI Symbol;Acc:MGI:1923824]
ENSMUSG00000038482	774.741	0.209521	0.171918	0.0042782	0.576195	Tfdp1	transcription factor Dp 1 [Source:MGI Symbol;Acc:MGI:101934]
ENSMUSG00000039741	631.466	0.241391	0.220525	0.00443476	0.592888	Bahcc1	BAH domain and coiled-coil containing 1 [Source:MGI Symbol;Acc:MGI:2679272]
ENSMUSG00000056899	83.8438	-0.0127611	0.0358441	0.00450067	0.592979	Immp2l	IMP2 inner mitochondrial membrane peptidase-like (S. cerevisiae) [Source:MGI Symbol;Acc:MGI:2135611]
ENSMUSG00000073557	3167.26	0.263885	0.248938	0.00450021	0.592979	Ppp1r12b	protein phosphatase 1, regulatory subunit 12B [Source:MGI Symbol;Acc:MGI:1916417]
ENSMUSG00000022055	134.285	0.397137	0.480597	0.00461402	0.60354	Nefl	neurofilament, light polypeptide [Source:MGI Symbol;Acc:MGI:97313]
ENSMUSG00000026828	444.341	0.290002	0.313471	0.00466386	0.605702	Galnt5	polypeptide N-acetylgalactosaminyltransferase 5 [Source:MGI Symbol;Acc:MGI:2179403]
ENSMUSG00000020846	2769.42	-0.0244936	0.0466421	0.00477175	0.615319	Rflnb	refilin B [Source:MGI Symbol;Acc:MGI:1923816]
ENSMUSG00000046688	484.364	0.235473	0.296543	0.00522418	0.666877	Tifa	TRAF-interacting protein with forkhead-associated domain [Source:MGI Symbol;Acc:MGI:2182965]
ENSMUSG00000040841	544.617	0.258857	0.342319	0.00524493	0.666877	Six5	sine oculis-related homeobox 5 [Source:MGI Symbol;Acc:MGI:106220]
ENSMUSG00000073758	2776.55	-0.229681	0.474201	0.00544453	0.683316	Sh3d21	SH3 domain containing 21 [Source:MGI Symbol;Acc:MGI:1914188]
ENSMUSG00000073987	5903.42	-0.0193452	0.0407849	0.00544939	0.683316	Ggh	gamma-glutamyl hydrolase [Source:MGI Symbol;Acc:MGI:1329035]
ENSMUSG00000047842	121.62	0.00586939	0.0330061	0.00556705	0.688572	Diras2	DIRAS family, GTP-binding RAS-like 2 [Source:MGI Symbol;Acc:MGI:1915453]
ENSMUSG00000025716	55.6491	0.0100641	0.0344565	0.00556268	0.688572	Myo3a	myosin IIIA [Source:MGI Symbol;Acc:MGI:2183924]
ENSMUSG00000073125	19.9059	0.00329841	0.0325022	0.00560562	0.688658	Xlr3b	X-linked lymphocyte-regulated 3B [Source:MGI Symbol;Acc:MGI:109505]
ENSMUSG00000090553	648.431	-0.21927	0.380916	0.00565539	0.689421	Snrpe	small nuclear ribonucleoprotein E [Source:MGI Symbol;Acc:MGI:98346]
ENSMUSG00000030060	403.608	-0.213696	0.361967	0.00568766	0.689421	Hmces	5-hydroxymethylcytosine (hmC) binding, ES cell specific [Source:MGI Symbol;Acc:MGI:1914053]
ENSMUSG00000071415	8703.98	-0.026081	0.0486921	0.00580027	0.698414	Rpl23	ribosomal protein L23 [Source:MGI Symbol;Acc:MGI:1929455]
ENSMUSG00000071415	8703.98	-0.026081	0.0486921	0.00580027	0.698414	Rpl23	ribosomal protein L23 [Source:MGI Symbol;Acc:MGI:1929455]
ENSMUSG00000071415	8703.98	-0.026081	0.0486921	0.00580027	0.698414	Rpl23	ribosomal protein L23 [Source:MGI Symbol;Acc:MGI:1929455]
ENSMUSG00000083621	124.595	-0.0118145	0.0352996	0.00593435	0.709857	Gm14586	predicted gene 14586 [Source:MGI Symbol;Acc:MGI:3705507]
ENSMUSG00000115783	1222.7	-0.0165698	0.0383798	0.00599115	0.711968	Bc1	brain cytoplasmic RNA 1 [Source:MGI Symbol;Acc:MGI:104905]
ENSMUSG00000022840	1109.75	0.191943	0.272971	0.00605104	0.714416	Adcy5	adenylate cyclase 5 [Source:MGI Symbol;Acc:MGI:99673]
ENSMUSG00000068452	1529.69	0.0151309	0.0373111	0.00614826	0.721211	Duox2	dual oxidase 2 [Source:MGI Symbol;Acc:MGI:3036280]
ENSMUSG00000063873	1096.68	0.174155	7.54762	0.00633329	0.738153	Slc24a3	solute carrier family 24 (sodium/potassium/calcium exchanger), member 3 [Source:MGI Symbol;Acc:MGI:2137513]
ENSMUSG00000039438	56.47	-0.00584958	0.032998	0.0064495	0.740175	Ttc36	tetratricopeptide repeat domain 36 [Source:MGI Symbol;Acc:MGI:2384760]
ENSMUSG00000094356	28.8034	-0.00512973	0.032829	0.00642903	0.740175	Igkv8-28	immunoglobulin kappa variable 8-28 [Source:MGI Symbol;Acc:MGI:3642251]
ENSMUSG00000094164	37.3031	-0.00147964	0.0323162	0.00650991	0.740175	Ighv2-3	immunoglobulin heavy variable 2-3 [Source:MGI Symbol;Acc:MGI:4439872]
ENSMUSG00000026669	261.16	0.014187	0.0366698	0.00651347	0.740175	Mcm10	minichromosome maintenance 10 replication initiation factor [Source:MGI Symbol;Acc:MGI:1917274]
ENSMUSG00000031349	884.021	0.0326291	0.0617555	0.00657338	0.742343	Nsdhl	NAD(P) dependent steroid dehydrogenase-like [Source:MGI Symbol;Acc:MGI:1099438]
ENSMUSG00000097789	93.6396	0.00812481	0.0336795	0.00668387	0.750162	Gm2115	predicted gene 2115 [Source:MGI Symbol;Acc:MGI:3780284]
ENSMUSG00000024727	1956.88	-0.0144689	0.036855	0.00675583	0.753586	Trpm6	transient receptor potential cation channel, subfamily M, member 6 [Source:MGI Symbol;Acc:MGI:2675603]
ENSMUSG00000042043	1134.06	-0.153866	0.215942	0.00680936	0.753732	Tbca	tubulin cofactor A [Source:MGI Symbol;Acc:MGI:107549]
ENSMUSG00000030409	7138.69	0.0206052	0.0422459	0.00684005	0.753732	Dmpk	dystrophia myotonica-protein kinase [Source:MGI Symbol;Acc:MGI:94906]
ENSMUSG00000062997	3655.78	-0.0275892	0.0516031	0.00689124	0.753738	Rpl35	ribosomal protein L35 [Source:MGI Symbol;Acc:MGI:1913739]
ENSMUSG00000095771	90.7583	0.00610427	0.0330624	0.00692301	0.753738	Igkv14-111	immunoglobulin kappa variable 14-111 [Source:MGI Symbol;Acc:MGI:4439863]
ENSMUSG00000089824	201.988	-0.016007	0.0379091	0.00702456	0.760242	Rbm12	RNA binding motif protein 12 [Source:MGI Symbol;Acc:MGI:1922960]
ENSMUSG00000108414	460.076	-0.0276254	0.0508339	0.00732464	0.762307	Snhg1	small nucleolar RNA host gene 1 [Source:MGI Symbol;Acc:MGI:3763743]
ENSMUSG00000034620	598.699	-0.024391	0.0461818	0.00758547	0.762307	Rxylt1	ribitol xylosyltransferase 1 [Source:MGI Symbol;Acc:MGI:2384919]
ENSMUSG00000028081	9317.82	-0.024186	0.0459398	0.00747291	0.762307	Rps3a1	ribosomal protein S3A1 [Source:MGI Symbol;Acc:MGI:1202063]
ENSMUSG00000001663	706.714	-0.0210823	0.0423851	0.00739406	0.762307	Gstt1	glutathione S-transferase, theta 1 [Source:MGI Symbol;Acc:MGI:107379]
ENSMUSG00000074182	269.504	-0.0197191	0.0410165	0.00755974	0.762307	Znhit6	zinc finger, HIT type 6 [Source:MGI Symbol;Acc:MGI:1916996]
ENSMUSG00000079435	3655.5	-0.0172055	0.0388436	0.00710027	0.762307	Rpl36a	ribosomal protein L36A [Source:MGI Symbol;Acc:MGI:1201789]
ENSMUSG00000084416	294.121	-0.0165447	0.0383109	0.00743954	0.762307	Rpl10a-ps1	ribosomal protein L10A, pseudogene 1 [Source:MGI Symbol;Acc:MGI:3705885]
ENSMUSG00000047676	103.022	-0.0125058	0.035648	0.00746843	0.762307	Rpsa-ps10	ribosomal protein SA, pseudogene 10 [Source:MGI Symbol;Acc:MGI:3704228]
ENSMUSG00000042784	520.105	-0.0123689	0.0355743	0.00758869	0.762307	Muc1	mucin 1, transmembrane [Source:MGI Symbol;Acc:MGI:97231]
ENSMUSG00000081855	16.3007	-0.00519168	0.0328398	0.0073171	0.762307	Rpl17-ps5	ribosomal protein L17, pseudogene 5 [Source:MGI Symbol;Acc:MGI:3704246]
ENSMUSG00000030554	3840.36	0.0154928	0.037554	0.00758056	0.762307	Synm	synemin, intermediate filament protein [Source:MGI Symbol;Acc:MGI:2661187]
ENSMUSG00000026463	2159.88	0.0186988	0.04015	0.00742501	0.762307	Atp2b4	ATPase, Ca++ transporting, plasma membrane 4 [Source:MGI Symbol;Acc:MGI:88111]
ENSMUSG00000015647	1476.38	0.0292039	0.0535327	0.00716833	0.762307	Lama5	laminin, alpha 5 [Source:MGI Symbol;Acc:MGI:105382]
ENSMUSG00000062328	10773.6	-0.0188566	0.0402274	0.00765003	0.764246	Rpl17	ribosomal protein L17 [Source:MGI Symbol;Acc:MGI:2448270]
ENSMUSG00000015568	601.2	-0.00902369	0.0340079	0.00785023	0.769736	Lpl	lipoprotein lipase [Source:MGI Symbol;Acc:MGI:96820]
ENSMUSG00000032081	27.0095	-0.00278973	0.0324345	0.00793972	0.769736	Apoc3	apolipoprotein C-III [Source:MGI Symbol;Acc:MGI:88055]
ENSMUSG00000031278	248.421	0.013855	0.0364286	0.00781004	0.769736	Acsl4	acyl-CoA synthetase long-chain family member 4 [Source:MGI Symbol;Acc:MGI:1354713]
ENSMUSG00000042155	514.757	0.0169102	0.0386596	0.00797502	0.769736	Klhl23	kelch-like 23 [Source:MGI Symbol;Acc:MGI:2683536]
ENSMUSG00000032875	762.924	0.0175395	0.0391586	0.00778154	0.769736	Arhgef17	Rho guanine nucleotide exchange factor (GEF) 17 [Source:MGI Symbol;Acc:MGI:2673002]
ENSMUSG00000030867	612.692	0.0216456	0.0429417	0.00800133	0.769736	Plk1	polo like kinase 1 [Source:MGI Symbol;Acc:MGI:97621]
ENSMUSG00000027330	678.78	0.0265546	0.0491619	0.00796098	0.769736	Cdc25b	cell division cycle 25B [Source:MGI Symbol;Acc:MGI:99701]
ENSMUSG00000094559	9658.27	-0.0231443	0.0446139	0.00817238	0.773545	Cyp2d34	cytochrome P450, family 2, subfamily d, polypeptide 34 [Source:MGI Symbol;Acc:MGI:2385022]
ENSMUSG00000063171	716.298	-0.0219286	0.0432365	0.00825364	0.773545	Rps4l	ribosomal protein S4-like [Source:MGI Symbol;Acc:MGI:1913434]
ENSMUSG00000028234	9901.75	-0.0132176	0.035559	0.0082067	0.773545	Rps20	ribosomal protein S20 [Source:MGI Symbol;Acc:MGI:1914677]
ENSMUSG00000111468	124.205	-0.00905799	0.0340167	0.00819866	0.773545	5033425B01Rik	RIKEN cDNA 5033425B01 gene [Source:MGI Symbol;Acc:MGI:1921983]
ENSMUSG00000106636	47.1359	-0.00855447	0.033826	0.00822225	0.773545	Gm43813	predicted gene 43813 [Source:MGI Symbol;Acc:MGI:5663950]
ENSMUSG00000028936	5385.57	-0.0296787	0.0538347	0.00863284	0.774688	Rpl22	ribosomal protein L22 [Source:MGI Symbol;Acc:MGI:99262]
ENSMUSG00000027170	1587.66	-0.0259066	0.0481104	0.00872701	0.774688	Eif3m	eukaryotic translation initiation factor 3, subunit M [Source:MGI Symbol;Acc:MGI:1351744]
ENSMUSG00000008333	573.809	-0.0234492	0.0448409	0.00879	0.774688	Snrpb2	U2 small nuclear ribonucleoprotein B [Source:MGI Symbol;Acc:MGI:104805]
ENSMUSG00000041782	8745.69	-0.0163077	0.0380788	0.0083672	0.774688	Lad1	ladinin [Source:MGI Symbol;Acc:MGI:109343]
ENSMUSG00000039217	1654.52	-0.0117034	0.0352117	0.00897919	0.774688	Il18	interleukin 18 [Source:MGI Symbol;Acc:MGI:107936]
ENSMUSG00000074882	1256.44	-0.00876634	0.0339026	0.00883993	0.774688	Cyp2c68	cytochrome P450, family 2, subfamily c, polypeptide 68 [Source:MGI Symbol;Acc:MGI:3612287]
ENSMUSG00000064358	14.2306	-0.00392941	0.0325946	0.00868346	0.774688	mt-Co3	mitochondrially encoded cytochrome c oxidase III [Source:MGI Symbol;Acc:MGI:102502]
ENSMUSG00000052305	778.27	-0.00338769	0.0325122	0.00891735	0.774688	Hbb-bs	hemoglobin, beta adult s chain [Source:MGI Symbol;Acc:MGI:5474852]
ENSMUSG00000052305	778.27	-0.00338769	0.0325122	0.00891735	0.774688	Hbb-bs	hemoglobin, beta adult s chain [Source:MGI Symbol;Acc:MGI:5474852]
ENSMUSG00000096336	149.779	0.00171885	0.0323324	0.0085054	0.774688	Igkv1-135	immunoglobulin kappa variable 1-135 [Source:MGI Symbol;Acc:MGI:3819952]
ENSMUSG00000096670	7.29114	0.00211629	0.0323643	0.00832571	0.774688	Ighv2-6	immunoglobulin heavy variable 2-6 [Source:MGI Symbol;Acc:MGI:4439518]
ENSMUSG00000043219	64.1552	0.00930552	0.0341121	0.00881753	0.774688	Hoxa6	homeobox A6 [Source:MGI Symbol;Acc:MGI:96178]
ENSMUSG00000018379	277.053	0.0145905	0.0369007	0.00854823	0.774688	Srsf1	serine and arginine-rich splicing factor 1 [Source:MGI Symbol;Acc:MGI:98283]
ENSMUSG00000028385	175.916	0.0148927	0.0370831	0.00880604	0.774688	Snx30	sorting nexin family member 30 [Source:MGI Symbol;Acc:MGI:2443882]
ENSMUSG00000038039	309.883	0.0158134	0.037798	0.00882925	0.774688	Gcc2	GRIP and coiled-coil domain containing 2 [Source:MGI Symbol;Acc:MGI:1917547]
ENSMUSG00000046295	278.079	0.0171063	0.0387079	0.00884882	0.774688	Ankle1	ankyrin repeat and LEM domain containing 1 [Source:MGI Symbol;Acc:MGI:1918775]
ENSMUSG00000037573	1793.84	0.0251675	0.0470469	0.00903278	0.774688	Tob1	transducer of ErbB-2.1 [Source:MGI Symbol;Acc:MGI:1349721]
ENSMUSG00000027513	4126.65	0.029051	0.0529897	0.00902335	0.774688	Pck1	phosphoenolpyruvate carboxykinase 1, cytosolic [Source:MGI Symbol;Acc:MGI:97501]
ENSMUSG00000048154	3115.62	0.0296791	0.0535603	0.0089481	0.774688	Kmt2d	lysine (K)-specific methyltransferase 2D [Source:MGI Symbol;Acc:MGI:2682319]
ENSMUSG00000086290	283.511	-0.0171475	0.0387259	0.00922838	0.78042	Snhg12	small nucleolar RNA host gene 12 [Source:MGI Symbol;Acc:MGI:1916721]
ENSMUSG00000018377	86.54	0.0107139	0.0347181	0.00922468	0.78042	Vezf1	vascular endothelial zinc finger 1 [Source:MGI Symbol;Acc:MGI:1313291]
ENSMUSG00000073434	320.272	0.0179964	0.0394512	0.00920888	0.78042	Wdr90	WD repeat domain 90 [Source:MGI Symbol;Acc:MGI:1921267]
ENSMUSG00000016763	379.178	0.0191431	0.0404151	0.00928116	0.78125	Scube1	signal peptide, CUB domain, EGF-like 1 [Source:MGI Symbol;Acc:MGI:1890616]
ENSMUSG00000097451	151.824	0.0125046	0.0356264	0.00935271	0.783645	Rian	RNA imprinted and accumulated in nucleus [Source:MGI Symbol;Acc:MGI:1922995]
ENSMUSG00000058546	7035.59	-0.0246321	0.0462824	0.00973823	0.787542	Rpl23a	ribosomal protein L23A [Source:MGI Symbol;Acc:MGI:3040672]
ENSMUSG00000058558	5671.69	-0.0221328	0.0433678	0.00962566	0.787542	Rpl5	ribosomal protein L5 [Source:MGI Symbol;Acc:MGI:102854]
ENSMUSG00000113555	93.4467	-0.00935181	0.0341237	0.00971627	0.787542	Gm10095	predicted gene 10095 [Source:MGI Symbol;Acc:MGI:3642130]
ENSMUSG00000040505	187.516	-0.00706115	0.033322	0.00955761	0.787542	Abcg5	ATP binding cassette subfamily G member 5 [Source:MGI Symbol;Acc:MGI:1351659]
ENSMUSG00000094344	17.268	-0.00499655	0.0327935	0.00971924	0.787542	Gm11942	predicted gene 11942 [Source:MGI Symbol;Acc:MGI:3650608]
ENSMUSG00000063388	8.02725	0.00182932	0.03234	0.00982689	0.787542	BC023105	cDNA sequence BC023105 [Source:MGI Symbol;Acc:MGI:2384767]
ENSMUSG00000090254	57.41	0.00611242	0.0330561	0.00983236	0.787542	Gm1965	predicted gene 1965 [Source:MGI Symbol;Acc:MGI:3584270]
ENSMUSG00000066441	538.602	0.0137728	0.0363622	0.00955085	0.787542	Rdh11	retinol dehydrogenase 11 [Source:MGI Symbol;Acc:MGI:102581]
ENSMUSG00000037119	167.268	0.013838	0.0363863	0.00951771	0.787542	Fam91a1	family with sequence similarity 91, member A1 [Source:MGI Symbol;Acc:MGI:1277178]
ENSMUSG00000021567	347.35	0.0187631	0.040082	0.00980127	0.787542	Nkd2	naked cuticle 2 [Source:MGI Symbol;Acc:MGI:1919543]
ENSMUSG00000024503	8829.12	-0.0133915	0.0361241	0.00999851	0.797337	Spink1	serine peptidase inhibitor, Kazal type 1 [Source:MGI Symbol;Acc:MGI:106202]
ENSMUSG00000042249	264.973	0.0129007	0.035839	0.0101564	0.799411	Grk3	G protein-coupled receptor kinase 3 [Source:MGI Symbol;Acc:MGI:87941]
ENSMUSG00000059326	864.86	0.025038	0.0471914	0.0101443	0.799411	Csf2ra	colony stimulating factor 2 receptor, alpha, low-affinity (granulocyte-macrophage) [Source:MGI Symbol;Acc:MGI:1339754]
ENSMUSG00000039477	2805.7	0.0285936	0.0517609	0.0101328	0.799411	Tnrc18	trinucleotide repeat containing 18 [Source:MGI Symbol;Acc:MGI:3648294]
ENSMUSG00000076615	135.752	-0.00595489	0.0330155	0.0102275	0.801533	Ighg3	Immunoglobulin heavy constant gamma 3 [Source:MGI Symbol;Acc:MGI:2144790]
ENSMUSG00000039163	478.454	-0.0182462	0.0395854	0.0104636	0.813031	Cmc1	COX assembly mitochondrial protein 1 [Source:MGI Symbol;Acc:MGI:1915149]
ENSMUSG00000025407	523.071	0.0174169	0.0389021	0.0104444	0.813031	Gli1	GLI-Kruppel family member GLI1 [Source:MGI Symbol;Acc:MGI:95727]
ENSMUSG00000043122	25.0695	-0.00439604	0.0326742	0.0107734	0.831184	A530016L24Rik	RIKEN cDNA A530016L24 gene [Source:MGI Symbol;Acc:MGI:2443020]
ENSMUSG00000056553	712.172	0.00905933	0.0339886	0.0108294	0.831184	Ptprn2	protein tyrosine phosphatase, receptor type, N polypeptide 2 [Source:MGI Symbol;Acc:MGI:107418]
ENSMUSG00000085830	118.186	0.0123821	0.0355425	0.0108884	0.831184	Grin1os	glutamate receptor, ionotropic, NMDA1 (zeta 1), opposite strand [Source:MGI Symbol;Acc:MGI:2443867]
ENSMUSG00000036863	182.683	0.0137394	0.0363138	0.0109258	0.831184	Syde2	synapse defective 1, Rho GTPase, homolog 2 (C. elegans) [Source:MGI Symbol;Acc:MGI:3036264]
ENSMUSG00000066440	501.349	0.0221897	0.0433624	0.0108451	0.831184	Zfyve26	zinc finger, FYVE domain containing 26 [Source:MGI Symbol;Acc:MGI:1924767]
ENSMUSG00000009927	5975.31	-0.0255988	0.0477709	0.0111158	0.833009	Rps25	ribosomal protein S25 [Source:MGI Symbol;Acc:MGI:1922867]
ENSMUSG00000032359	1863.29	-0.0212036	0.0422423	0.0114161	0.833009	Ctsh	cathepsin H [Source:MGI Symbol;Acc:MGI:107285]
ENSMUSG00000090191	178.236	-0.00837855	0.0337468	0.0111325	0.833009	9230105E05Rik	RIKEN cDNA 9230105E05 gene [Source:MGI Symbol;Acc:MGI:2444388]
ENSMUSG00000096464	62.9019	0.00450583	0.0326952	0.0113273	0.833009	Ighv2-2	immunoglobulin heavy variable 2-2 [Source:MGI Symbol;Acc:MGI:4439894]
ENSMUSG00000026114	16.2744	0.00450822	0.0326938	0.0113527	0.833009	Cnga3	cyclic nucleotide gated channel alpha 3 [Source:MGI Symbol;Acc:MGI:1341818]
ENSMUSG00000092586	33.4986	0.00539223	0.0328774	0.011311	0.833009	Ly6g6c	lymphocyte antigen 6 complex, locus G6C [Source:MGI Symbol;Acc:MGI:2148930]
ENSMUSG00000072082	356.85	0.0168358	0.0384192	0.0114943	0.833009	Ccnf	cyclin F [Source:MGI Symbol;Acc:MGI:102551]
ENSMUSG00000028849	1774.66	0.0183514	0.039661	0.0111196	0.833009	Map7d1	MAP7 domain containing 1 [Source:MGI Symbol;Acc:MGI:2384297]
ENSMUSG00000001995	441.71	0.0200276	0.0410905	0.0114237	0.833009	Sipa1l2	signal-induced proliferation-associated 1 like 2 [Source:MGI Symbol;Acc:MGI:2676970]
ENSMUSG00000029309	10220.1	0.02194	0.0435253	0.0115912	0.833009	Sparcl1	SPARC-like 1 [Source:MGI Symbol;Acc:MGI:108110]
ENSMUSG00000026131	3953.16	0.0247337	0.0461096	0.0115591	0.833009	Dst	dystonin [Source:MGI Symbol;Acc:MGI:104627]
ENSMUSG00000024378	2661.27	0.0280325	0.0505939	0.0113811	0.833009	Stard4	StAR-related lipid transfer (START) domain containing 4 [Source:MGI Symbol;Acc:MGI:2156764]
ENSMUSG00000031565	1132.29	0.0282907	0.052111	0.0115862	0.833009	Fgfr1	fibroblast growth factor receptor 1 [Source:MGI Symbol;Acc:MGI:95522]
ENSMUSG00000044783	3200.13	0.0337555	0.0600924	0.0112633	0.833009	Hjurp	Holliday junction recognition protein [Source:MGI Symbol;Acc:MGI:2685821]
ENSMUSG00000044783	3200.13	0.0337555	0.0600924	0.0112633	0.833009	Hjurp	Holliday junction recognition protein [Source:MGI Symbol;Acc:MGI:2685821]
ENSMUSG00000028820	3060.83	-0.0314656	0.0559895	0.0120543	0.848603	Sfpq	splicing factor proline/glutamine rich (polypyrimidine tract binding protein associated) [Source:MGI Symbol;Acc:MGI:1918764]
ENSMUSG00000063273	959.674	-0.0295201	0.053062	0.0118933	0.848603	Naa15	N(alpha)-acetyltransferase 15, NatA auxiliary subunit [Source:MGI Symbol;Acc:MGI:1922088]
ENSMUSG00000090862	5499.37	-0.0205923	0.0416637	0.0120882	0.848603	Rps13	ribosomal protein S13 [Source:MGI Symbol;Acc:MGI:1915302]
ENSMUSG00000030621	127.233	-0.00949952	0.0341666	0.0120274	0.848603	Me3	malic enzyme 3, NADP(+)-dependent, mitochondrial [Source:MGI Symbol;Acc:MGI:1916679]
ENSMUSG00000045281	529.723	0.0155902	0.0375039	0.0120823	0.848603	Gpr20	G protein-coupled receptor 20 [Source:MGI Symbol;Acc:MGI:2441803]
ENSMUSG00000013033	1032.63	0.0321052	0.0573666	0.0120039	0.848603	Adgrl1	adhesion G protein-coupled receptor L1 [Source:MGI Symbol;Acc:MGI:1929461]
ENSMUSG00000022336	2489.11	-0.0365899	0.0673415	0.0123094	0.853974	Eif3e	eukaryotic translation initiation factor 3, subunit E [Source:MGI Symbol;Acc:MGI:99257]
ENSMUSG00000018882	842.735	-0.020782	0.041821	0.0123827	0.853974	Mrpl45	mitochondrial ribosomal protein L45 [Source:MGI Symbol;Acc:MGI:1914286]
ENSMUSG00000053332	2466.4	-0.0202135	0.0412723	0.0124456	0.853974	Gas5	growth arrest specific 5 [Source:MGI Symbol;Acc:MGI:95659]
ENSMUSG00000086841	641.789	-0.0187954	0.0401397	0.0125024	0.853974	2410006H16Rik	RIKEN cDNA 2410006H16 gene [Source:MGI Symbol;Acc:MGI:1916471]
ENSMUSG00000043510	370.798	-0.0184926	0.0396573	0.0125553	0.853974	Hscb	HscB iron-sulfur cluster co-chaperone [Source:MGI Symbol;Acc:MGI:2141135]
ENSMUSG00000052139	964.405	-0.0176754	0.0388021	0.0129969	0.853974	Babam2	BRISC and BRCA1 A complex member 2 [Source:MGI Symbol;Acc:MGI:1333875]
ENSMUSG00000021416	312.921	-0.0169088	0.0384465	0.0126839	0.853974	Eci3	enoyl-Coenzyme A delta isomerase 3 [Source:MGI Symbol;Acc:MGI:1916373]
ENSMUSG00000021018	436.233	-0.0152164	0.0372369	0.0124531	0.853974	Polr2h	polymerase (RNA) II (DNA directed) polypeptide H [Source:MGI Symbol;Acc:MGI:2384309]
ENSMUSG00000023078	207.33	-0.013696	0.0362603	0.0129562	0.853974	Cxcl13	chemokine (C-X-C motif) ligand 13 [Source:MGI Symbol;Acc:MGI:1888499]
ENSMUSG00000032454	865.749	-0.00964942	0.0342247	0.0131932	0.853974	Rbp2	retinol binding protein 2, cellular [Source:MGI Symbol;Acc:MGI:97877]
ENSMUSG00000094433	667.289	-0.0042682	0.0326539	0.0124507	0.853974	Igkv5-43	immunoglobulin kappa chain variable 5-43 [Source:MGI Symbol;Acc:MGI:4943320]
ENSMUSG00000038168	371.397	0.0142631	0.036607	0.0127002	0.853974	P3h2	prolyl 3-hydroxylase 2 [Source:MGI Symbol;Acc:MGI:2146663]
ENSMUSG00000033763	710.484	0.0143523	0.0365095	0.0127577	0.853974	Mtss2	MTSS I-BAR domain containing 2 [Source:MGI Symbol;Acc:MGI:3039591]
ENSMUSG00000022836	15958.4	0.0174646	0.0388811	0.0128498	0.853974	Mylk	myosin, light polypeptide kinase [Source:MGI Symbol;Acc:MGI:894806]
ENSMUSG00000035357	740.403	0.0177765	0.0391217	0.0131227	0.853974	Pdzrn3	PDZ domain containing RING finger 3 [Source:MGI Symbol;Acc:MGI:1933157]
ENSMUSG00000042507	615.368	0.0184552	0.039679	0.0131814	0.853974	Elmsan1	ELM2 and Myb/SANT-like domain containing 1 [Source:MGI Symbol;Acc:MGI:2685106]
ENSMUSG00000024754	481.825	0.0184895	0.0397153	0.0129809	0.853974	Cemip2	cell migration inducing hyaluronidase 2 [Source:MGI Symbol;Acc:MGI:1890373]
ENSMUSG00000050503	762.894	0.0190846	0.0403546	0.013198	0.853974	Fbxl22	F-box and leucine-rich repeat protein 22 [Source:MGI Symbol;Acc:MGI:1921415]
ENSMUSG00000001630	1092.28	0.0214843	0.0424994	0.0129664	0.853974	Stk38l	serine/threonine kinase 38 like [Source:MGI Symbol;Acc:MGI:1922250]
ENSMUSG00000031328	29120.1	0.0260514	0.0477816	0.0131955	0.853974	Flna	filamin, alpha [Source:MGI Symbol;Acc:MGI:95556]
ENSMUSG00000029512	1045.82	0.027849	0.0503622	0.0124923	0.853974	Ulk1	unc-51 like kinase 1 [Source:MGI Symbol;Acc:MGI:1270126]
ENSMUSG00000001424	2273.87	0.0280099	0.0494328	0.0130522	0.853974	Snd1	staphylococcal nuclease and tudor domain containing 1 [Source:MGI Symbol;Acc:MGI:1929266]
ENSMUSG00000030495	17.9924	-0.00346951	0.032518	0.0132485	0.854202	Slc7a10	solute carrier family 7 (cationic amino acid transporter, y+ system), member 10 [Source:MGI Symbol;Acc:MGI:1858261]
ENSMUSG00000031129	123.635	0.0101039	0.034415	0.0132971	0.854302	Slc9a9	solute carrier family 9 (sodium/hydrogen exchanger), member 9 [Source:MGI Symbol;Acc:MGI:2679732]
ENSMUSG00000032540	776.475	-0.0184863	0.0396875	0.0135677	0.854828	Abhd5	abhydrolase domain containing 5 [Source:MGI Symbol;Acc:MGI:1914719]
ENSMUSG00000097162	40.5599	-0.00702909	0.0332974	0.0136776	0.854828	2310010J17Rik	RIKEN cDNA 2310010J17 gene [Source:MGI Symbol;Acc:MGI:1925579]
ENSMUSG00000102602	30.2298	-0.00587054	0.0329842	0.0136552	0.854828	A930004J17Rik	RIKEN cDNA A930004J17 gene [Source:MGI Symbol;Acc:MGI:2442442]
ENSMUSG00000047822	28.4489	-0.00482169	0.0327523	0.013556	0.854828	Angptl8	angiopoietin-like 8 [Source:MGI Symbol;Acc:MGI:3643534]
ENSMUSG00000027559	1071.81	-0.00333702	0.0325014	0.0135424	0.854828	Car3	carbonic anhydrase 3 [Source:MGI Symbol;Acc:MGI:88270]
ENSMUSG00000043300	121.76	0.0126896	0.0356761	0.0136814	0.854828	B3galnt1	UDP-GalNAc:betaGlcNAc beta 1,3-galactosaminyltransferase, polypeptide 1 [Source:MGI Symbol;Acc:MGI:1349405]
ENSMUSG00000029516	394.482	0.0170504	0.0384133	0.013458	0.854828	Cit	citron [Source:MGI Symbol;Acc:MGI:105313]
ENSMUSG00000028803	2085.57	0.0339058	0.0593914	0.0136514	0.854828	Nipal3	NIPA-like domain containing 3 [Source:MGI Symbol;Acc:MGI:1921802]
ENSMUSG00000041453	10005.6	-0.0183415	0.0399165	0.0138062	0.859136	Rpl21	ribosomal protein L21 [Source:MGI Symbol;Acc:MGI:1278340]
ENSMUSG00000046442	104.334	0.0100725	0.0343935	0.0138854	0.859136	Ppm1e	protein phosphatase 1E (PP2C domain containing) [Source:MGI Symbol;Acc:MGI:2444096]
ENSMUSG00000029275	252.83	0.0146706	0.036847	0.0138921	0.859136	Gfi1	growth factor independent 1 transcription repressor [Source:MGI Symbol;Acc:MGI:103170]
ENSMUSG00000042812	620.948	0.0155698	0.0374542	0.0139612	0.860483	Foxf1	forkhead box F1 [Source:MGI Symbol;Acc:MGI:1347470]
ENSMUSG00000045128	11619.2	-0.0156577	0.0375096	0.0140751	0.864575	Rpl18a	ribosomal protein L18A [Source:MGI Symbol;Acc:MGI:1924058]
ENSMUSG00000001134	253.717	-0.0164558	0.0379937	0.014339	0.87052	Uxt	ubiquitously expressed prefoldin like chaperone [Source:MGI Symbol;Acc:MGI:1277988]
ENSMUSG00000046721	262.479	-0.0139155	0.036374	0.0143609	0.87052	Rpl14-ps1	ribosomal protein L14, pseudogene 1 [Source:MGI Symbol;Acc:MGI:3710579]
ENSMUSG00000029134	34.9378	0.00333283	0.0325004	0.0143634	0.87052	Plb1	phospholipase B1 [Source:MGI Symbol;Acc:MGI:1922406]
ENSMUSG00000028059	1643.65	0.0253727	0.0466595	0.0143163	0.87052	Arhgef2	rho/rac guanine nucleotide exchange factor (GEF) 2 [Source:MGI Symbol;Acc:MGI:103264]
ENSMUSG00000094483	2709.56	-0.0287944	0.050688	0.0147258	0.87272	Purb	purine rich element binding protein B [Source:MGI Symbol;Acc:MGI:1338779]
ENSMUSG00000051518	329.175	-0.0166353	0.0382054	0.0144486	0.87272	Rps19bp1	ribosomal protein S19 binding protein 1 [Source:MGI Symbol;Acc:MGI:1913788]
ENSMUSG00000117042	33.1141	-0.00645369	0.0331314	0.0147357	0.87272	2700054A10Rik	RIKEN cDNA 2700054A10 gene [Source:MGI Symbol;Acc:MGI:1919828]
ENSMUSG00000058064	19.301	-0.00548605	0.0328929	0.0145099	0.87272	Gm10036	predicted gene 10036 [Source:MGI Symbol;Acc:MGI:3642334]
ENSMUSG00000029868	127.254	-0.00491007	0.0327696	0.0146442	0.87272	Trpv6	transient receptor potential cation channel, subfamily V, member 6 [Source:MGI Symbol;Acc:MGI:1927259]
ENSMUSG00000068606	12.1734	0.00164424	0.0323256	0.014645	0.87272	Gm4841	predicted gene 4841 [Source:MGI Symbol;Acc:MGI:3643814]
ENSMUSG00000020700	541.513	0.0149858	0.0370504	0.0146032	0.87272	Map3k3	mitogen-activated protein kinase kinase kinase 3 [Source:MGI Symbol;Acc:MGI:1346874]
ENSMUSG00000025185	67.6965	0.00900728	0.0339611	0.0149456	0.88127	Loxl4	lysyl oxidase-like 4 [Source:MGI Symbol;Acc:MGI:1914823]
ENSMUSG00000037239	97.2631	0.0106494	0.0346411	0.0150255	0.88127	Spred3	sprouty-related EVH1 domain containing 3 [Source:MGI Symbol;Acc:MGI:2142186]
ENSMUSG00000020926	447.978	0.019236	0.0403221	0.014985	0.88127	Adam11	a disintegrin and metallopeptidase domain 11 [Source:MGI Symbol;Acc:MGI:1098667]
ENSMUSG00000015879	74.2224	-0.0103243	0.0344966	0.0151268	0.881524	Fam184b	family with sequence similarity 184, member B [Source:MGI Symbol;Acc:MGI:2442958]
ENSMUSG00000069874	557.565	0.00714505	0.0333306	0.0150784	0.881524	Irgm2	immunity-related GTPase family M member 2 [Source:MGI Symbol;Acc:MGI:1926262]
ENSMUSG00000055134	119.96	0.0112157	0.034905	0.0152605	0.886472	9130017K11Rik	RIKEN cDNA 9130017K11 gene [Source:MGI Symbol;Acc:MGI:1926030]
ENSMUSG00000028068	558.302	0.0222432	0.0433995	0.0154103	0.892326	Iqgap3	IQ motif containing GTPase activating protein 3 [Source:MGI Symbol;Acc:MGI:3028642]
ENSMUSG00000022247	629.423	-0.0248498	0.0460313	0.0161308	0.894169	Brix1	BRX1, biogenesis of ribosomes [Source:MGI Symbol;Acc:MGI:1915082]
ENSMUSG00000026234	6510.95	-0.0240982	0.04444	0.0164958	0.894169	Ncl	nucleolin [Source:MGI Symbol;Acc:MGI:97286]
ENSMUSG00000084319	585.755	-0.0231831	0.0440832	0.0165028	0.894169	Tpt1-ps3	tumor protein, translationally-controlled, pseudogene 3 [Source:MGI Symbol;Acc:MGI:2664997]
ENSMUSG00000020485	643.889	-0.0218071	0.0427664	0.0175318	0.894169	Supt4a	SPT4A, DSIF elongation factor subunit [Source:MGI Symbol;Acc:MGI:107416]
ENSMUSG00000008683	5393.61	-0.0207586	0.041745	0.0165701	0.894169	Rps15a	ribosomal protein S15A [Source:MGI Symbol;Acc:MGI:2389091]
ENSMUSG00000021243	681.491	-0.0207087	0.0414846	0.0167201	0.894169	Fcf1	FCF1 rRNA processing protein [Source:MGI Symbol;Acc:MGI:1920986]
ENSMUSG00000040888	899.197	-0.0201407	0.0409971	0.0176687	0.894169	Gfer	growth factor, augmenter of liver regeneration [Source:MGI Symbol;Acc:MGI:107757]
ENSMUSG00000021996	3521.87	-0.0189786	0.0396302	0.0159854	0.894169	Esd	esterase D/formylglutathione hydrolase [Source:MGI Symbol;Acc:MGI:95421]
ENSMUSG00000034473	539.344	-0.0189086	0.0399247	0.0174262	0.894169	Sec22a	SEC22 homolog A, vesicle trafficking protein [Source:MGI Symbol;Acc:MGI:2447876]
ENSMUSG00000026087	1418.59	-0.018867	0.0399052	0.0161441	0.894169	Mrpl30	mitochondrial ribosomal protein L30 [Source:MGI Symbol;Acc:MGI:1333820]
ENSMUSG00000020460	4615.67	-0.0171198	0.0385426	0.0156591	0.894169	Rps27a	ribosomal protein S27A [Source:MGI Symbol;Acc:MGI:1925544]
ENSMUSG00000000805	27191.3	-0.0104376	0.0343784	0.0167746	0.894169	Car4	carbonic anhydrase 4 [Source:MGI Symbol;Acc:MGI:1096574]
ENSMUSG00000040592	414.601	-0.0100134	0.0343594	0.0158495	0.894169	Cd79b	CD79B antigen [Source:MGI Symbol;Acc:MGI:96431]
ENSMUSG00000096852	1730.12	-0.00889731	0.0339116	0.016636	0.894169	Cyp2d12	cytochrome P450, family 2, subfamily d, polypeptide 12 [Source:MGI Symbol;Acc:MGI:88604]
ENSMUSG00000022579	83.614	-0.0079161	0.0335627	0.0174075	0.894169	Gpihbp1	GPI-anchored HDL-binding protein 1 [Source:MGI Symbol;Acc:MGI:1915703]
ENSMUSG00000037738	42.647	-0.00771789	0.033502	0.0160158	0.894169	Nek5	NIMA (never in mitosis gene a)-related expressed kinase 5 [Source:MGI Symbol;Acc:MGI:2142824]
ENSMUSG00000027487	378.714	-0.00720748	0.0333434	0.0163683	0.894169	Cdk5rap1	CDK5 regulatory subunit associated protein 1 [Source:MGI Symbol;Acc:MGI:1914221]
ENSMUSG00000072688	97.4671	-0.00688054	0.0332447	0.0175361	0.894169	Gm10399	predicted gene 10399 [Source:MGI Symbol;Acc:MGI:3704255]
ENSMUSG00000036395	27.1178	-0.00487712	0.0327592	0.0167769	0.894169	Glb1l2	galactosidase, beta 1-like 2 [Source:MGI Symbol;Acc:MGI:2388283]
ENSMUSG00000092014	14.1517	-0.00441766	0.0326697	0.0175757	0.894169	Gm4468	predicted gene 4468 [Source:MGI Symbol;Acc:MGI:3782652]
ENSMUSG00000076934	1381.57	-0.00371816	0.032556	0.0155073	0.894169	Iglv1	immunoglobulin lambda variable 1 [Source:MGI Symbol;Acc:MGI:96530]
ENSMUSG00000087367	8.86486	-0.00304594	0.0324596	0.0173424	0.894169	Gm15491	predicted gene 15491 [Source:MGI Symbol;Acc:MGI:3782937]
ENSMUSG00000076580	132.766	-0.00234352	0.0323829	0.0176029	0.894169	Igkv8-27	immunoglobulin kappa chain variable 8-27 [Source:MGI Symbol;Acc:MGI:4439868]
ENSMUSG00000076541	11.1462	0.00230756	0.0323789	0.0174975	0.894169	Igkv4-79	immunoglobulin kappa variable 4-79 [Source:MGI Symbol;Acc:MGI:2685040]
ENSMUSG00000034161	46.9252	0.00650025	0.0331406	0.01722	0.894169	Scx	scleraxis [Source:MGI Symbol;Acc:MGI:102934]
ENSMUSG00000032649	46.0844	0.00760416	0.033463	0.0167491	0.894169	Colgalt2	collagen beta(1-O)galactosyltransferase 2 [Source:MGI Symbol;Acc:MGI:2138232]
ENSMUSG00000019831	46.088	0.00799072	0.0335902	0.0168638	0.894169	Wasf1	WAS protein family, member 1 [Source:MGI Symbol;Acc:MGI:1890563]
ENSMUSG00000055493	50.1696	0.00822952	0.0336682	0.0171994	0.894169	Epm2a	epilepsy, progressive myoclonic epilepsy, type 2 gene alpha [Source:MGI Symbol;Acc:MGI:1341085]
ENSMUSG00000021260	84.6528	0.010566	0.0345969	0.0157004	0.894169	Hhipl1	hedgehog interacting protein-like 1 [Source:MGI Symbol;Acc:MGI:1919265]
ENSMUSG00000049191	81.8511	0.0109317	0.034763	0.0157032	0.894169	Rtl5	retrotransposon Gag like 5 [Source:MGI Symbol;Acc:MGI:3045324]
ENSMUSG00000037709	704.494	0.0114538	0.0350309	0.0176655	0.894169	Fam13a	family with sequence similarity 13, member A [Source:MGI Symbol;Acc:MGI:1889842]
ENSMUSG00000079355	250.124	0.0127801	0.0356206	0.0166796	0.894169	Ackr4	atypical chemokine receptor 4 [Source:MGI Symbol;Acc:MGI:2181676]
ENSMUSG00000025738	132.469	0.0128652	0.0357455	0.0161076	0.894169	Fbxl16	F-box and leucine-rich repeat protein 16 [Source:MGI Symbol;Acc:MGI:2448488]
ENSMUSG00000001228	435.034	0.0154829	0.0373295	0.0175632	0.894169	Uhrf1	ubiquitin-like, containing PHD and RING finger domains, 1 [Source:MGI Symbol;Acc:MGI:1338889]
ENSMUSG00000041939	915.151	0.0160878	0.037741	0.0175855	0.894169	Mvk	mevalonate kinase [Source:MGI Symbol;Acc:MGI:107624]
ENSMUSG00000038065	324.216	0.0161523	0.0378121	0.0163786	0.894169	Mturn	maturin, neural progenitor differentiation regulator homolog (Xenopus) [Source:MGI Symbol;Acc:MGI:1915485]
ENSMUSG00000049807	359.848	0.0168253	0.0382812	0.0172342	0.894169	Arhgap23	Rho GTPase activating protein 23 [Source:MGI Symbol;Acc:MGI:3697726]
ENSMUSG00000020900	473.436	0.0169028	0.0383574	0.0168603	0.894169	Myh10	myosin, heavy polypeptide 10, non-muscle [Source:MGI Symbol;Acc:MGI:1930780]
ENSMUSG00000035356	560.393	0.0178863	0.0391042	0.0171045	0.894169	Nfkbiz	nuclear factor of kappa light polypeptide gene enhancer in B cells inhibitor, zeta [Source:MGI Symbol;Acc:MGI:1931595]
ENSMUSG00000049493	2989.07	0.0187202	0.0398809	0.0164168	0.894169	Pls1	plastin 1 (I-isoform) [Source:MGI Symbol;Acc:MGI:104809]
ENSMUSG00000032782	358.969	0.020376	0.0412871	0.0160119	0.894169	Cntrob	centrobin, centrosomal BRCA2 interacting protein [Source:MGI Symbol;Acc:MGI:2443290]
ENSMUSG00000035735	515.141	0.0207603	0.0413546	0.0167777	0.894169	Dagla	diacylglycerol lipase, alpha [Source:MGI Symbol;Acc:MGI:2677061]
ENSMUSG00000031386	1960.11	0.0224845	0.0433667	0.0157323	0.894169	Hcfc1	host cell factor C1 [Source:MGI Symbol;Acc:MGI:105942]
ENSMUSG00000032855	2026.86	0.0293077	0.0517933	0.0172904	0.894169	Pkd1	polycystin 1, transient receptor poteintial channel interacting [Source:MGI Symbol;Acc:MGI:97603]
ENSMUSG00000029547	1674.09	0.0327745	0.0575945	0.0163704	0.894169	Ints1	integrator complex subunit 1 [Source:MGI Symbol;Acc:MGI:1915760]
ENSMUSG00000006932	13975.5	0.0333315	0.0582093	0.0177044	0.894169	Ctnnb1	catenin (cadherin associated protein), beta 1 [Source:MGI Symbol;Acc:MGI:88276]
ENSMUSG00000075010	1338.23	-0.0241735	0.045182	0.0178688	0.89592	AW112010	expressed sequence AW112010 [Source:MGI Symbol;Acc:MGI:2147706]
ENSMUSG00000024248	3032.62	-0.0198543	0.0409734	0.0182799	0.89592	Cox7a2l	cytochrome c oxidase subunit 7A2 like [Source:MGI Symbol;Acc:MGI:106015]
ENSMUSG00000104436	25.6093	-0.00484084	0.0327498	0.0182811	0.89592	Gm37423	predicted gene, 37423 [Source:MGI Symbol;Acc:MGI:5610651]
ENSMUSG00000097615	19.2131	-0.00342382	0.0325099	0.0181146	0.89592	Gm2061	predicted gene 2061 [Source:MGI Symbol;Acc:MGI:3780228]
ENSMUSG00000015533	487.148	0.00706432	0.0332987	0.0179772	0.89592	Itga2	integrin alpha 2 [Source:MGI Symbol;Acc:MGI:96600]
ENSMUSG00000039942	627.979	0.0111738	0.0348636	0.0181958	0.89592	Ptger4	prostaglandin E receptor 4 (subtype EP4) [Source:MGI Symbol;Acc:MGI:104311]
ENSMUSG00000102918	369.601	0.0120449	0.0352936	0.0181808	0.89592	Pcdhgc3	protocadherin gamma subfamily C, 3 [Source:MGI Symbol;Acc:MGI:1935201]
ENSMUSG00000034949	214.209	0.0140587	0.036414	0.017996	0.89592	Zfr2	zinc finger RNA binding protein 2 [Source:MGI Symbol;Acc:MGI:2143792]
ENSMUSG00000015305	1258.23	0.0142861	0.0365529	0.0180469	0.89592	Sash1	SAM and SH3 domain containing 1 [Source:MGI Symbol;Acc:MGI:1917347]
ENSMUSG00000022803	523.768	0.0143058	0.0365651	0.0180308	0.89592	Popdc2	popeye domain containing 2 [Source:MGI Symbol;Acc:MGI:1930150]
ENSMUSG00000032911	659.89	0.014542	0.036727	0.0181896	0.89592	Cspg4	chondroitin sulfate proteoglycan 4 [Source:MGI Symbol;Acc:MGI:2153093]
ENSMUSG00000041841	6351.71	-0.0149484	0.0368497	0.0184637	0.898005	Rpl37	ribosomal protein L37 [Source:MGI Symbol;Acc:MGI:1914531]
ENSMUSG00000041841	6351.71	-0.0149484	0.0368497	0.0184637	0.898005	Rpl37	ribosomal protein L37 [Source:MGI Symbol;Acc:MGI:1914531]
ENSMUSG00000034462	759.554	0.014483	0.0366656	0.0184718	0.898005	Pkd2	polycystin 2, transient receptor potential cation channel [Source:MGI Symbol;Acc:MGI:1099818]
ENSMUSG00000022272	1601.93	0.0208888	0.041693	0.0184544	0.898005	Myo10	myosin X [Source:MGI Symbol;Acc:MGI:107716]
ENSMUSG00000017404	5307.11	-0.0171249	0.0384736	0.0186197	0.900382	Rpl19	ribosomal protein L19 [Source:MGI Symbol;Acc:MGI:98020]
ENSMUSG00000039196	15.4789	-0.0027863	0.0324288	0.0186121	0.900382	Orm1	orosomucoid 1 [Source:MGI Symbol;Acc:MGI:97443]
ENSMUSG00000002944	399.443	-0.0103922	0.0345032	0.0186713	0.90048	Cd36	CD36 molecule [Source:MGI Symbol;Acc:MGI:107899]
ENSMUSG00000030315	924.352	0.0234477	0.0442389	0.0187521	0.901987	Vgll4	vestigial like family member 4 [Source:MGI Symbol;Acc:MGI:2652840]
ENSMUSG00000057531	571.994	-0.0149874	0.0369806	0.0188496	0.903268	Dtnbp1	dystrobrevin binding protein 1 [Source:MGI Symbol;Acc:MGI:2137586]
ENSMUSG00000018001	736.264	0.0185326	0.0395721	0.0188781	0.903268	Cyth3	cytohesin 3 [Source:MGI Symbol;Acc:MGI:1335107]
ENSMUSG00000028788	7520.65	-0.0230691	0.0438172	0.0189934	0.904367	Ptp4a2	protein tyrosine phosphatase 4a2 [Source:MGI Symbol;Acc:MGI:1277117]
ENSMUSG00000060739	1207.25	-0.022595	0.0433205	0.0190006	0.904367	Nsa2	NSA2 ribosome biogenesis homolog [Source:MGI Symbol;Acc:MGI:1913883]
ENSMUSG00000022887	124.446	0.00933387	0.034064	0.0192384	0.906196	Masp1	mannan-binding lectin serine peptidase 1 [Source:MGI Symbol;Acc:MGI:88492]
ENSMUSG00000018378	269.01	0.0135549	0.036099	0.0192125	0.906196	Cuedc1	CUE domain containing 1 [Source:MGI Symbol;Acc:MGI:2144281]
ENSMUSG00000032849	401.893	0.0146381	0.0367579	0.019108	0.906196	Abcc4	ATP-binding cassette, sub-family C (CFTR/MRP), member 4 [Source:MGI Symbol;Acc:MGI:2443111]
ENSMUSG00000042439	344.197	0.0153313	0.0372047	0.0191956	0.906196	Zfp532	zinc finger protein 532 [Source:MGI Symbol;Acc:MGI:3036282]
ENSMUSG00000022111	371.881	-0.0150758	0.0370262	0.019613	0.913441	Uchl3	ubiquitin carboxyl-terminal esterase L3 (ubiquitin thiolesterase) [Source:MGI Symbol;Acc:MGI:1355274]
ENSMUSG00000032892	395.808	-0.0139862	0.0363413	0.0195831	0.913441	Rangrf	RAN guanine nucleotide release factor [Source:MGI Symbol;Acc:MGI:1889073]
ENSMUSG00000060019	136.508	-0.0105116	0.0345498	0.0194917	0.913441	Gm10073	predicted pseudogene 10073 [Source:MGI Symbol;Acc:MGI:3641908]
ENSMUSG00000094930	26.3768	-0.00518278	0.0328181	0.0196434	0.913441	Igkv6-25	immunoglobulin kappa chain variable 6-25 [Source:MGI Symbol;Acc:MGI:4439867]
ENSMUSG00000035283	64.0631	0.00828811	0.0336824	0.019493	0.913441	Adrb1	adrenergic receptor, beta 1 [Source:MGI Symbol;Acc:MGI:87937]
ENSMUSG00000042729	552.033	-0.0165942	0.0380578	0.0198007	0.915831	Wdr74	WD repeat domain 74 [Source:MGI Symbol;Acc:MGI:2147427]
ENSMUSG00000000486	293.858	-0.0163629	0.03793	0.0198184	0.915831	Septin1	septin 1 [Source:MGI Symbol;Acc:MGI:1858916]
ENSMUSG00000009356	151.12	0.00813567	0.0336284	0.0198459	0.915831	Lpo	lactoperoxidase [Source:MGI Symbol;Acc:MGI:1923363]
ENSMUSG00000027254	482.66	0.0137169	0.036187	0.0199531	0.91845	Map1a	microtubule-associated protein 1 A [Source:MGI Symbol;Acc:MGI:1306776]
ENSMUSG00000032239	1358	-0.0213701	0.0420444	0.0202755	0.922366	Rp9	retinitis pigmentosa 9 (human) [Source:MGI Symbol;Acc:MGI:2157166]
ENSMUSG00000064368	447.852	-0.0183753	0.0393946	0.0205962	0.922366	mt-Nd6	mitochondrially encoded NADH dehydrogenase 6 [Source:MGI Symbol;Acc:MGI:102495]
ENSMUSG00000029614	8421.05	-0.0180612	0.0391497	0.0204756	0.922366	Rpl6	ribosomal protein L6 [Source:MGI Symbol;Acc:MGI:108057]
ENSMUSG00000071078	389.845	-0.0169395	0.0382967	0.0203899	0.922366	Nr2c2ap	nuclear receptor 2C2-associated protein [Source:MGI Symbol;Acc:MGI:1922942]
ENSMUSG00000072692	345.051	-0.0126451	0.0355837	0.0201241	0.922366	Rpl37rt	ribosomal protein L37, retrotransposed [Source:MGI Symbol;Acc:MGI:3651519]
ENSMUSG00000087590	227.351	-0.0114892	0.0349943	0.020181	0.922366	Epb41l4aos	erythrocyte membrane protein band 4.1 like 4a, opposite strand [Source:MGI Symbol;Acc:MGI:1916999]
ENSMUSG00000104213	468.002	-0.00757928	0.0334463	0.0205711	0.922366	Ighd	immunoglobulin heavy constant delta [Source:MGI Symbol;Acc:MGI:96447]
ENSMUSG00000029821	191.163	0.00792866	0.0335586	0.0204217	0.922366	Gsdme	gasdermin E [Source:MGI Symbol;Acc:MGI:1889850]
ENSMUSG00000012443	146.97	0.00967757	0.0341903	0.0205295	0.922366	Kif11	kinesin family member 11 [Source:MGI Symbol;Acc:MGI:1098231]
ENSMUSG00000025870	183.049	0.0110352	0.0346545	0.0204377	0.922366	Arl10	ADP-ribosylation factor-like 10 [Source:MGI Symbol;Acc:MGI:1930788]
ENSMUSG00000010663	894.443	0.018074	0.0392028	0.0204265	0.922366	Fads1	fatty acid desaturase 1 [Source:MGI Symbol;Acc:MGI:1923517]
ENSMUSG00000060938	8022.93	-0.0168493	0.0382254	0.0207101	0.922918	Rpl26	ribosomal protein L26 [Source:MGI Symbol;Acc:MGI:106022]
ENSMUSG00000022197	361.491	0.012613	0.0355646	0.0206948	0.922918	Pdzd2	PDZ domain containing 2 [Source:MGI Symbol;Acc:MGI:1922394]
ENSMUSG00000022040	716.043	-0.011183	0.0348423	0.0210961	0.932091	Ephx2	epoxide hydrolase 2, cytoplasmic [Source:MGI Symbol;Acc:MGI:99500]
ENSMUSG00000107838	44.0931	-0.00745993	0.0334068	0.021121	0.932091	Gm45769	predicted gene 45769 [Source:MGI Symbol;Acc:MGI:5804884]
ENSMUSG00000034871	6.9469	0.00206495	0.0323566	0.0209822	0.932091	Fam151a	family with sequence simliarity 151, member A [Source:MGI Symbol;Acc:MGI:2657115]
ENSMUSG00000045039	1296.81	0.0251901	0.0461074	0.0210975	0.932091	Megf8	multiple EGF-like-domains 8 [Source:MGI Symbol;Acc:MGI:2446294]
ENSMUSG00000105199	10.1058	-0.00372477	0.0325511	0.0212538	0.932824	Gm43581	predicted gene 43581 [Source:MGI Symbol;Acc:MGI:5663718]
ENSMUSG00000026069	77.4506	0.00591416	0.0329835	0.0214323	0.932824	Il1rl1	interleukin 1 receptor-like 1 [Source:MGI Symbol;Acc:MGI:98427]
ENSMUSG00000038210	212.935	0.0108283	0.0346815	0.0215454	0.932824	Hoxa11	homeobox A11 [Source:MGI Symbol;Acc:MGI:96172]
ENSMUSG00000046410	927.453	0.0116491	0.03506	0.0214568	0.932824	Kcnk6	potassium inwardly-rectifying channel, subfamily K, member 6 [Source:MGI Symbol;Acc:MGI:1891291]
ENSMUSG00000071317	184.85	0.0123526	0.0354197	0.0215394	0.932824	Bves	blood vessel epicardial substance [Source:MGI Symbol;Acc:MGI:1346013]
ENSMUSG00000029468	271.128	0.0127305	0.0356195	0.021548	0.932824	P2rx7	purinergic receptor P2X, ligand-gated ion channel, 7 [Source:MGI Symbol;Acc:MGI:1339957]
ENSMUSG00000071176	340.688	0.01438	0.0365639	0.0215164	0.932824	Arhgef10	Rho guanine nucleotide exchange factor (GEF) 10 [Source:MGI Symbol;Acc:MGI:2444453]
ENSMUSG00000035873	663.447	0.0165371	0.0380249	0.0214669	0.932824	Pawr	PRKC, apoptosis, WT1, regulator [Source:MGI Symbol;Acc:MGI:2149961]
ENSMUSG00000005580	141.04	0.0129681	0.0357436	0.0217085	0.937541	Adcy9	adenylate cyclase 9 [Source:MGI Symbol;Acc:MGI:108450]
ENSMUSG00000049517	4724.1	-0.015451	0.037099	0.02183	0.93833	Rps23	ribosomal protein S23 [Source:MGI Symbol;Acc:MGI:1913725]
ENSMUSG00000032531	440.558	0.00908714	0.0339286	0.0218299	0.93833	Amotl2	angiomotin-like 2 [Source:MGI Symbol;Acc:MGI:1929286]
ENSMUSG00000032602	3509.56	-0.0180968	0.0391345	0.0220721	0.938454	Slc25a20	solute carrier family 25 (mitochondrial carnitine/acylcarnitine translocase), member 20 [Source:MGI Symbol;Acc:MGI:1928738]
ENSMUSG00000095633	60.0313	0.00195232	0.0323476	0.0221426	0.938454	Igkv4-58	immunoglobulin kappa variable 4-58 [Source:MGI Symbol;Acc:MGI:2685923]
ENSMUSG00000081303	42.973	0.00737451	0.0333775	0.0221316	0.938454	Gm16011	predicted gene 16011 [Source:MGI Symbol;Acc:MGI:3801796]
ENSMUSG00000060227	228.794	0.00756948	0.0334395	0.0221144	0.938454	Casc4	cancer susceptibility candidate 4 [Source:MGI Symbol;Acc:MGI:2443129]
ENSMUSG00000020848	54.49	0.00848645	0.03374	0.0219861	0.938454	Doc2b	double C2, beta [Source:MGI Symbol;Acc:MGI:1100497]
ENSMUSG00000034621	1108.45	0.0157063	0.0374162	0.0221396	0.938454	Gpatch8	G patch domain containing 8 [Source:MGI Symbol;Acc:MGI:1918667]
ENSMUSG00000023176	43.0102	-0.00289439	0.0324401	0.0222229	0.939666	Cpn2	carboxypeptidase N, polypeptide 2 [Source:MGI Symbol;Acc:MGI:1919006]
ENSMUSG00000038900	9039.07	-0.0175648	0.0389439	0.0225054	0.940675	Rpl12	ribosomal protein L12 [Source:MGI Symbol;Acc:MGI:98002]
ENSMUSG00000023089	1496.74	-0.0152328	0.0370836	0.0224824	0.940675	Ndufa5	NADH:ubiquinone oxidoreductase subunit A5 [Source:MGI Symbol;Acc:MGI:1915452]
ENSMUSG00000058056	2893.12	0.0135015	0.0360314	0.0223652	0.940675	Palld	palladin, cytoskeletal associated protein [Source:MGI Symbol;Acc:MGI:1919583]
ENSMUSG00000036560	291.586	0.0157065	0.0373934	0.0224706	0.940675	Lgi4	leucine-rich repeat LGI family, member 4 [Source:MGI Symbol;Acc:MGI:2180197]
ENSMUSG00000027007	1936.77	0.0202717	0.0403262	0.0223804	0.940675	Itprid2	ITPR interacting domain containing 2 [Source:MGI Symbol;Acc:MGI:1917849]
ENSMUSG00000095210	7.87592	-0.00241783	0.0323876	0.0226747	0.941259	Ighv5-9-1	immunoglobulin heavy variable 5-9-1 [Source:MGI Symbol;Acc:MGI:4439810]
ENSMUSG00000023905	208.269	0.011253	0.0348681	0.0226315	0.941259	Tnfrsf12a	tumor necrosis factor receptor superfamily, member 12a [Source:MGI Symbol;Acc:MGI:1351484]
ENSMUSG00000086968	528.27	0.0174071	0.0385998	0.0226268	0.941259	4933431E20Rik	RIKEN cDNA 4933431E20 gene [Source:MGI Symbol;Acc:MGI:3584041]
ENSMUSG00000020720	1192.28	-0.0248315	0.0452798	0.026146	0.946152	Psmd12	proteasome (prosome, macropain) 26S subunit, non-ATPase, 12 [Source:MGI Symbol;Acc:MGI:1914247]
ENSMUSG00000020923	3700.72	-0.0240251	0.0442573	0.0287249	0.946152	Ubtf	upstream binding transcription factor, RNA polymerase I [Source:MGI Symbol;Acc:MGI:98512]
ENSMUSG00000022024	1161.91	-0.0236474	0.0442633	0.0234451	0.946152	Sugt1	SGT1, suppressor of G2 allele of SKP1 (S. cerevisiae) [Source:MGI Symbol;Acc:MGI:1915205]
ENSMUSG00000024477	864.978	-0.021714	0.0423139	0.022949	0.946152	Pggt1b	protein geranylgeranyltransferase type I, beta subunit [Source:MGI Symbol;Acc:MGI:1917514]
ENSMUSG00000032399	29517	-0.0199499	0.040486	0.0243984	0.946152	Rpl4	ribosomal protein L4 [Source:MGI Symbol;Acc:MGI:1915141]
ENSMUSG00000109685	903.147	-0.0193958	0.0400214	0.028268	0.946152	Gm45912	predicted gene 45912 [Source:MGI Symbol;Acc:MGI:5805027]
ENSMUSG00000024146	987.103	-0.0185325	0.0393159	0.0287081	0.946152	Cript	cysteine-rich PDZ-binding protein [Source:MGI Symbol;Acc:MGI:1929655]
ENSMUSG00000021428	382.461	-0.0180502	0.0390055	0.0262704	0.946152	Riok1	RIO kinase 1 [Source:MGI Symbol;Acc:MGI:1918590]
ENSMUSG00000019763	435.105	-0.0172993	0.0384467	0.0256457	0.946152	Rmnd1	required for meiotic nuclear division 1 homolog [Source:MGI Symbol;Acc:MGI:1913334]
ENSMUSG00000015656	18040.8	-0.0162551	0.037699	0.0264892	0.946152	Hspa8	heat shock protein 8 [Source:MGI Symbol;Acc:MGI:105384]
ENSMUSG00000025362	10968.8	-0.0155901	0.0372738	0.0252557	0.946152	Rps26	ribosomal protein S26 [Source:MGI Symbol;Acc:MGI:1351628]
ENSMUSG00000057841	11138.5	-0.0149825	0.0369133	0.0231436	0.946152	Rpl32	ribosomal protein L32 [Source:MGI Symbol;Acc:MGI:98038]
ENSMUSG00000014313	5838.48	-0.0149032	0.0368203	0.0273312	0.946152	Cox6c	cytochrome c oxidase subunit 6C [Source:MGI Symbol;Acc:MGI:104614]
ENSMUSG00000027673	2684.67	-0.0148596	0.0365603	0.0282311	0.946152	Ndufb5	NADH:ubiquinone oxidoreductase subunit B5 [Source:MGI Symbol;Acc:MGI:1913296]
ENSMUSG00000022354	2082.26	-0.014549	0.0366299	0.0253512	0.946152	Ndufb9	NADH:ubiquinone oxidoreductase subunit B9 [Source:MGI Symbol;Acc:MGI:1913468]
ENSMUSG00000022554	249.518	-0.0144595	0.0365383	0.0265635	0.946152	Hgh1	HGH1 homolog [Source:MGI Symbol;Acc:MGI:1930628]
ENSMUSG00000019797	631.712	-0.0143589	0.0365164	0.0238745	0.946152	Mtres1	mitochondrial transcription rescue factor 1 [Source:MGI Symbol;Acc:MGI:1915101]
ENSMUSG00000062198	178.91	-0.0137804	0.0361949	0.024145	0.946152	2700097O09Rik	RIKEN cDNA 2700097O09 gene [Source:MGI Symbol;Acc:MGI:1919908]
ENSMUSG00000059291	5145.38	-0.0137719	0.0361384	0.0273559	0.946152	Rpl11	ribosomal protein L11 [Source:MGI Symbol;Acc:MGI:1914275]
ENSMUSG00000021079	308.8	-0.0136529	0.0360593	0.027661	0.946152	Timm9	translocase of inner mitochondrial membrane 9 [Source:MGI Symbol;Acc:MGI:1353436]
ENSMUSG00000031320	16204.6	-0.0131131	0.0353561	0.0236917	0.946152	Rps4x	ribosomal protein S4, X-linked [Source:MGI Symbol;Acc:MGI:98158]
ENSMUSG00000079507	166.452	-0.0130672	0.0357489	0.0265849	0.946152	H2-Q1	histocompatibility 2, Q region locus 1 [Source:MGI Symbol;Acc:MGI:95928]
ENSMUSG00000016833	249.463	-0.0130355	0.0357244	0.0273221	0.946152	Mrps18c	mitochondrial ribosomal protein S18C [Source:MGI Symbol;Acc:MGI:1915985]
ENSMUSG00000060419	332.216	-0.0121754	0.0352971	0.0243397	0.946152	Rps16-ps2	ribosomal protein S16, pseudogene 2 [Source:MGI Symbol;Acc:MGI:3704259]
ENSMUSG00000022820	220.311	-0.0119633	0.0351743	0.0271048	0.946152	Ndufb4	NADH:ubiquinone oxidoreductase subunit B4 [Source:MGI Symbol;Acc:MGI:1915444]
ENSMUSG00000022820	220.311	-0.0119633	0.0351743	0.0271048	0.946152	Ndufb4	NADH:ubiquinone oxidoreductase subunit B4 [Source:MGI Symbol;Acc:MGI:1915444]
ENSMUSG00000022820	220.311	-0.0119633	0.0351743	0.0271048	0.946152	Ndufb4	NADH:ubiquinone oxidoreductase subunit B4 [Source:MGI Symbol;Acc:MGI:1915444]
ENSMUSG00000033213	2401.32	-0.0118084	0.0350867	0.0275762	0.946152	AA467197	expressed sequence AA467197 [Source:MGI Symbol;Acc:MGI:3034182]
ENSMUSG00000107383	123.503	-0.0116894	0.035045	0.0273545	0.946152	Gm4366	predicted gene 4366 [Source:MGI Symbol;Acc:MGI:3782551]
ENSMUSG00000029276	125.6	-0.0113572	0.0349086	0.0251936	0.946152	Glmn	glomulin, FKBP associated protein [Source:MGI Symbol;Acc:MGI:2141180]
ENSMUSG00000036278	531.866	-0.0112498	0.0348333	0.0265159	0.946152	Macrod1	mono-ADP ribosylhydrolase 1 [Source:MGI Symbol;Acc:MGI:2147583]
ENSMUSG00000102373	119.137	-0.0111412	0.0347883	0.0266866	0.946152	9530018H14Rik	RIKEN cDNA 9530018H14 gene [Source:MGI Symbol;Acc:MGI:1924645]
ENSMUSG00000025408	456.181	-0.0110062	0.0347287	0.0259748	0.946152	Ddit3	DNA-damage inducible transcript 3 [Source:MGI Symbol;Acc:MGI:109247]
ENSMUSG00000029865	7722.89	-0.0108691	0.0346682	0.0270968	0.946152	Sval1	seminal vesicle antigen-like 1 [Source:MGI Symbol;Acc:MGI:1918828]
ENSMUSG00000074682	117.357	-0.0107544	0.0346097	0.0263776	0.946152	Zcchc3	zinc finger, CCHC domain containing 3 [Source:MGI Symbol;Acc:MGI:1915167]
ENSMUSG00000080848	116.072	-0.0102691	0.0344262	0.0228593	0.946152	Gm9385	predicted pseudogene 9385 [Source:MGI Symbol;Acc:MGI:3646182]
ENSMUSG00000003379	359.557	-0.00926664	0.0340146	0.0247164	0.946152	Cd79a	CD79A antigen (immunoglobulin-associated alpha) [Source:MGI Symbol;Acc:MGI:101774]
ENSMUSG00000024747	331.256	-0.00910928	0.0339586	0.0242134	0.946152	Aldh1a7	aldehyde dehydrogenase family 1, subfamily A7 [Source:MGI Symbol;Acc:MGI:1347050]
ENSMUSG00000116802	71.3319	-0.00822547	0.033639	0.0249337	0.946152	Gm5165	predicted gene 5165 [Source:MGI Symbol;Acc:MGI:3646034]
ENSMUSG00000037254	455.701	-0.0080008	0.03356	0.0247863	0.946152	Itih2	inter-alpha trypsin inhibitor, heavy chain 2 [Source:MGI Symbol;Acc:MGI:96619]
ENSMUSG00000066724	70.6396	-0.00765677	0.0334492	0.0265946	0.946152	Gm10175	predicted gene 10175 [Source:MGI Symbol;Acc:MGI:3704287]
ENSMUSG00000022947	631.013	-0.00751191	0.033411	0.0246341	0.946152	Cbr3	carbonyl reductase 3 [Source:MGI Symbol;Acc:MGI:1309992]
ENSMUSG00000058905	34.4206	-0.00660353	0.0331523	0.023987	0.946152	Gm10051	predicted pseudogene 10051 [Source:MGI Symbol;Acc:MGI:3641791]
ENSMUSG00000057265	38.4628	-0.0061687	0.0330333	0.0276272	0.946152	Bbof1	basal body orientation factor 1 [Source:MGI Symbol;Acc:MGI:1920123]
ENSMUSG00000053173	24.9593	-0.00555368	0.0328922	0.024532	0.946152	Rpl18-ps2	ribosomal protein L18, pseudogene 2 [Source:MGI Symbol;Acc:MGI:3646997]
ENSMUSG00000058216	76.3572	-0.00511033	0.0327967	0.0252058	0.946152	Gstp3	glutathione S-transferase pi 3 [Source:MGI Symbol;Acc:MGI:2385078]
[truncated: 17,735 more rows]

## Sheet: Co-IP MS 
Mass spectrometric analysis of Mul1A interacting proteins
[truncated: 146 more rows]

## Sheet: Primers
Primer and adaptor sequences
[truncated: 42 more rows]
